# Supplementary material for: One-pot synthesis of tri- and di-fluoromethylated bis(indolyl)methanols via Friedel–Crafts-type acylation and alkylation
Source: Royal Society of Chemistry journal article supplement (doi:10.1039/d2ob01281b), 2022-01-01

## Supplementary Information

### **Copies of NMR Spectra**

<sup>1</sup>H NMR (400 MHz, acetone-d<sub>6</sub>)

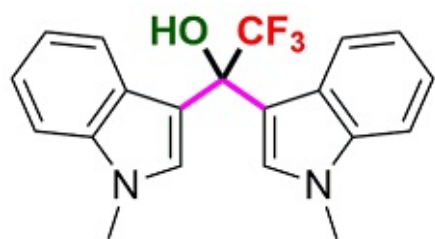

**3aa**

7.439  
7.419  
7.358  
7.337  
7.101  
7.081  
7.063  
6.849  
6.829  
6.811

5.468

3.850

2.880

2.061  
2.055  
2.050  
2.044  
2.039

-0.002

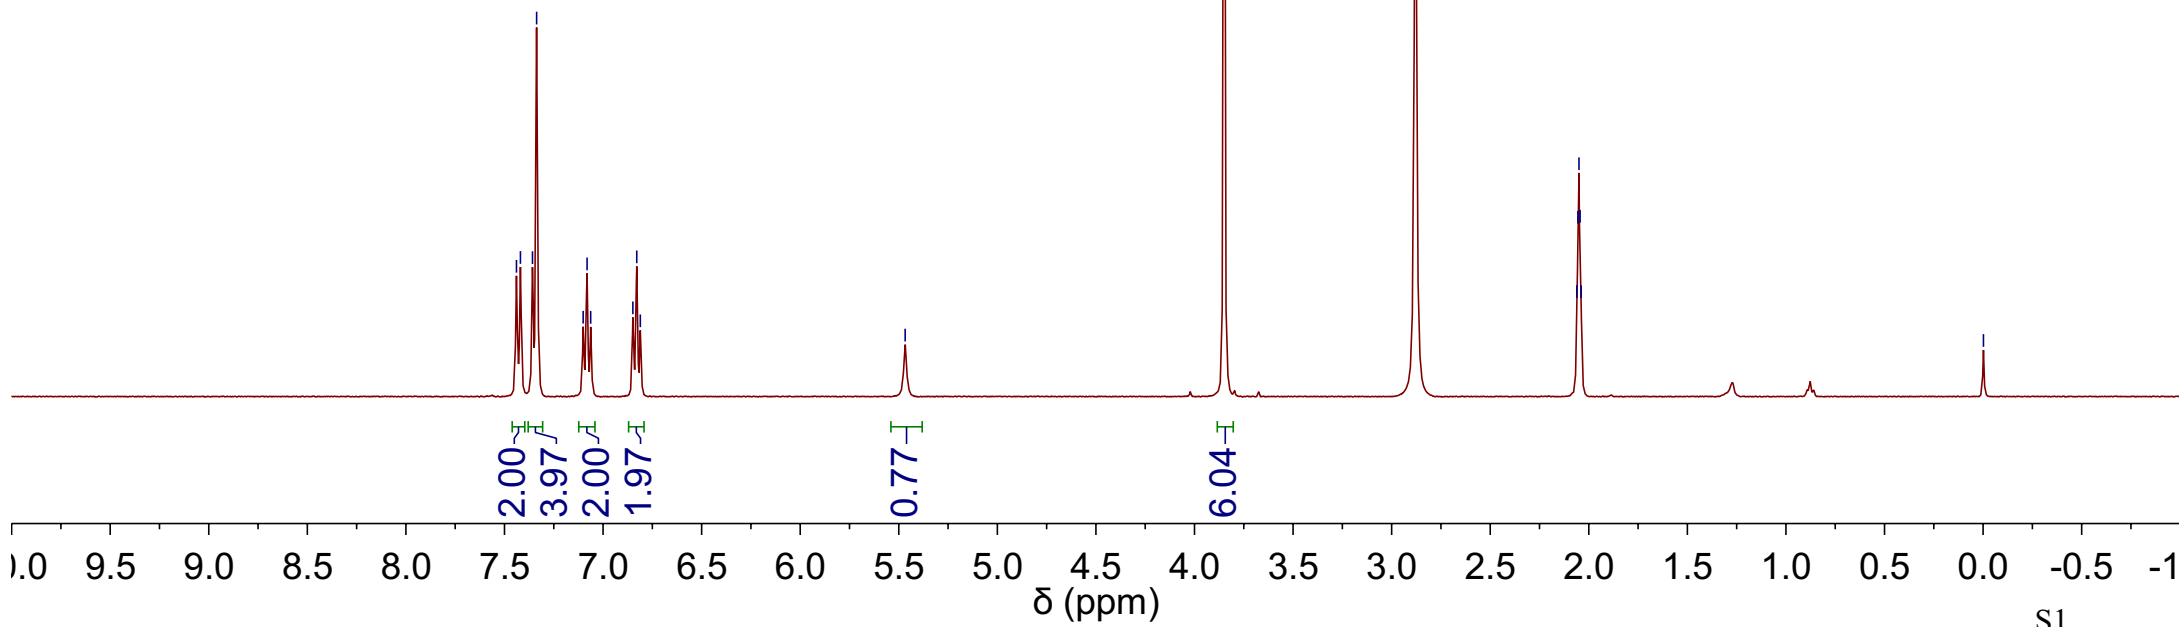

<sup>13</sup>C NMR (126 MHz, acetone-d<sub>6</sub>)

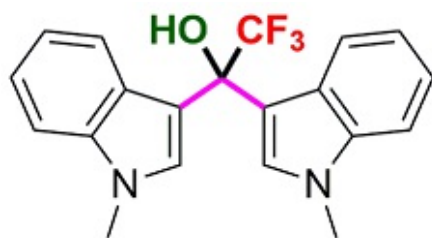

3aa

206.42

138.27  
130.91  
129.15  
128.63  
127.62  
126.35  
124.08  
122.36  
122.17  
119.72  
113.96  
110.17

76.06  
75.82  
75.58  
75.33

32.90  
30.30  
30.15  
29.99  
29.84  
29.69  
29.53  
29.38

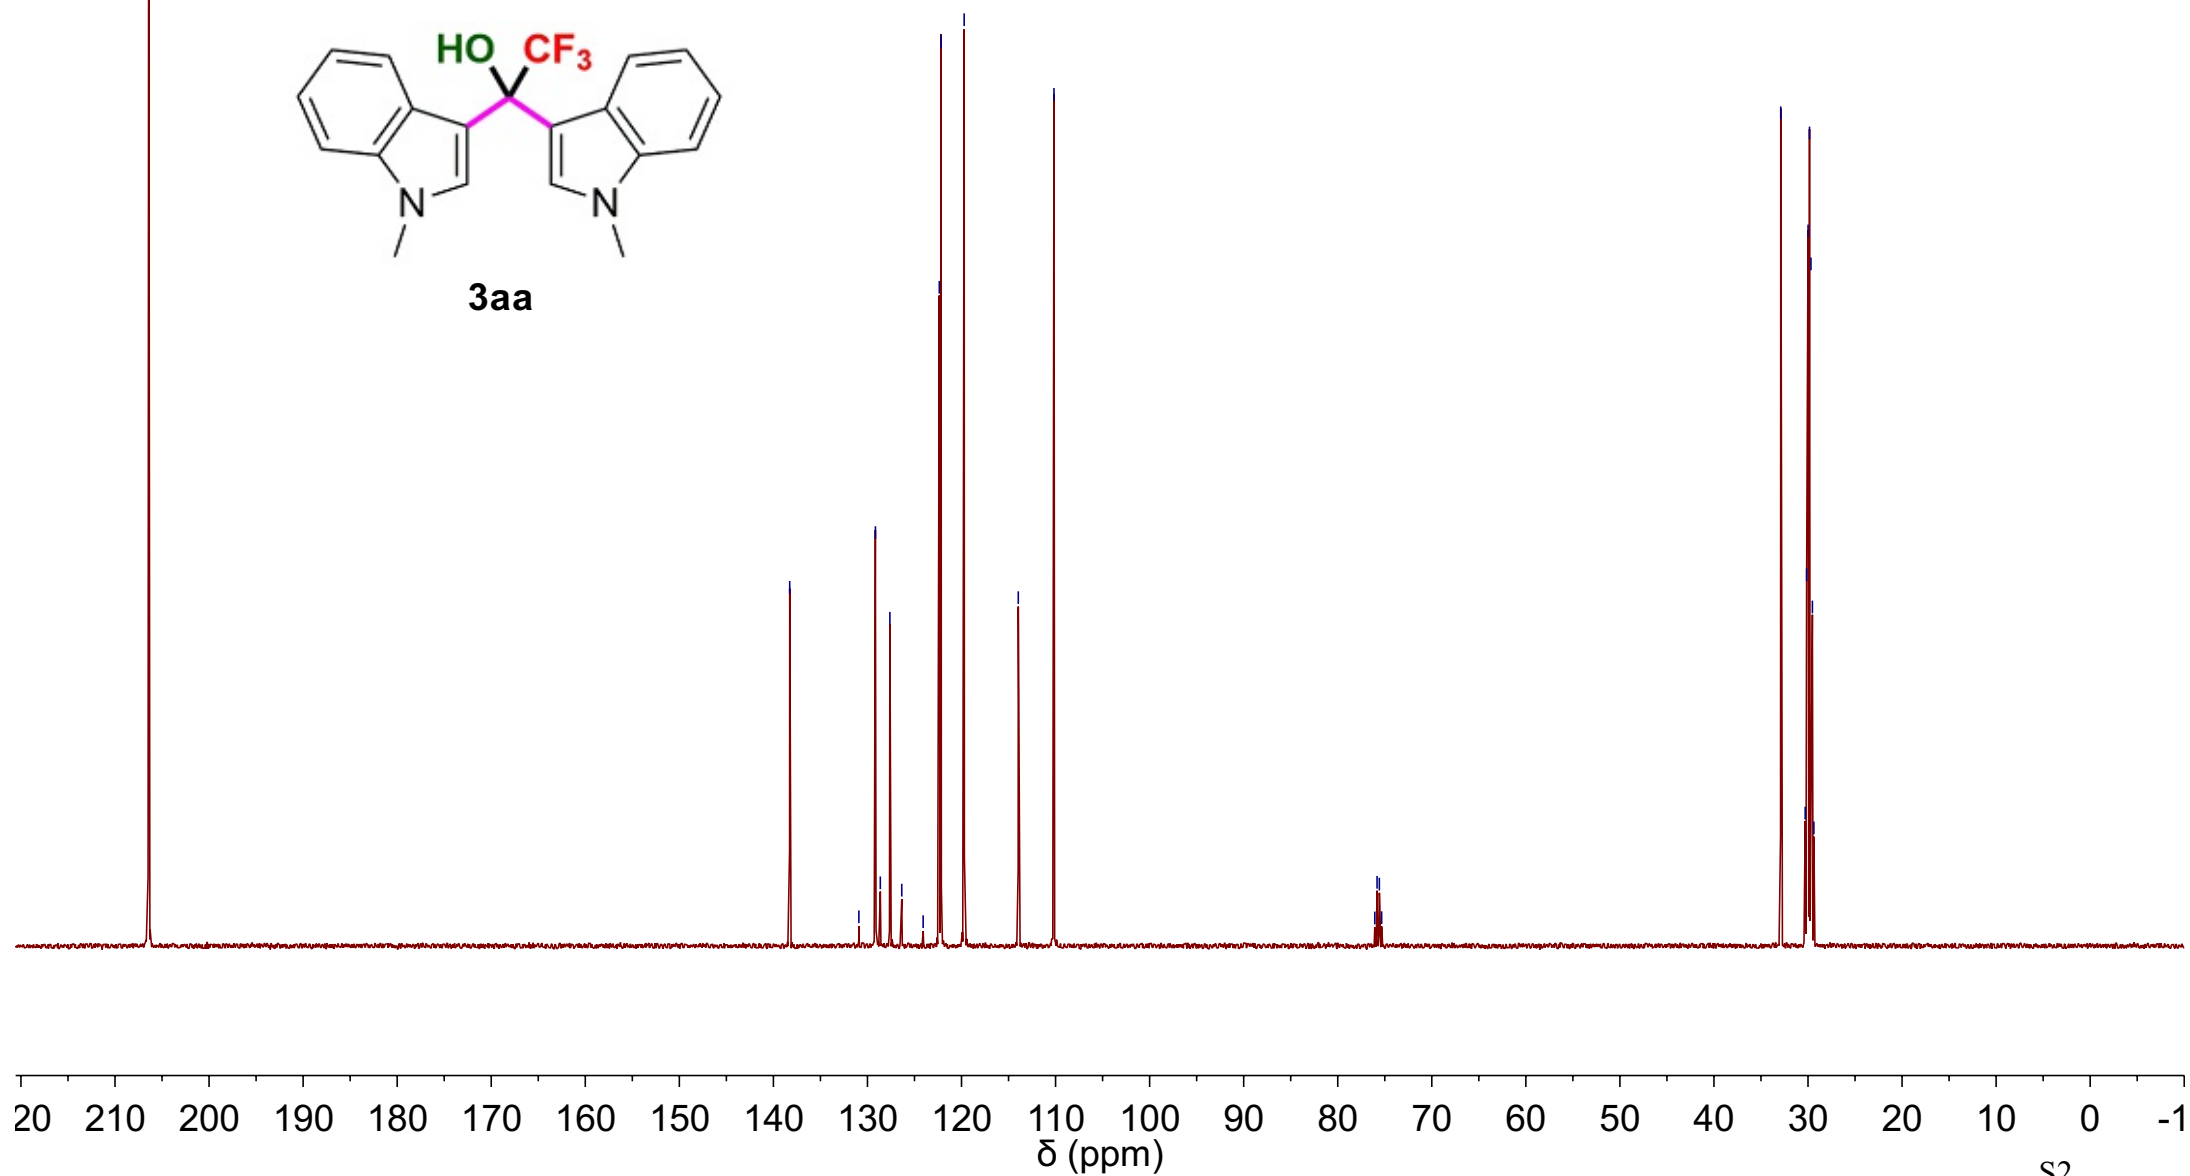

$^{19}\text{F}$  NMR (471 MHz, acetone- $d_6$ )

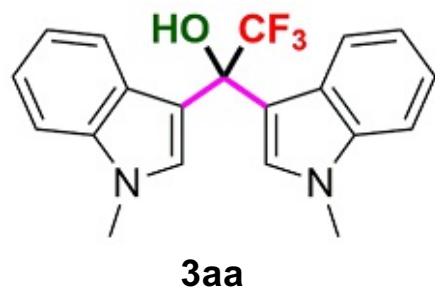

--77.31

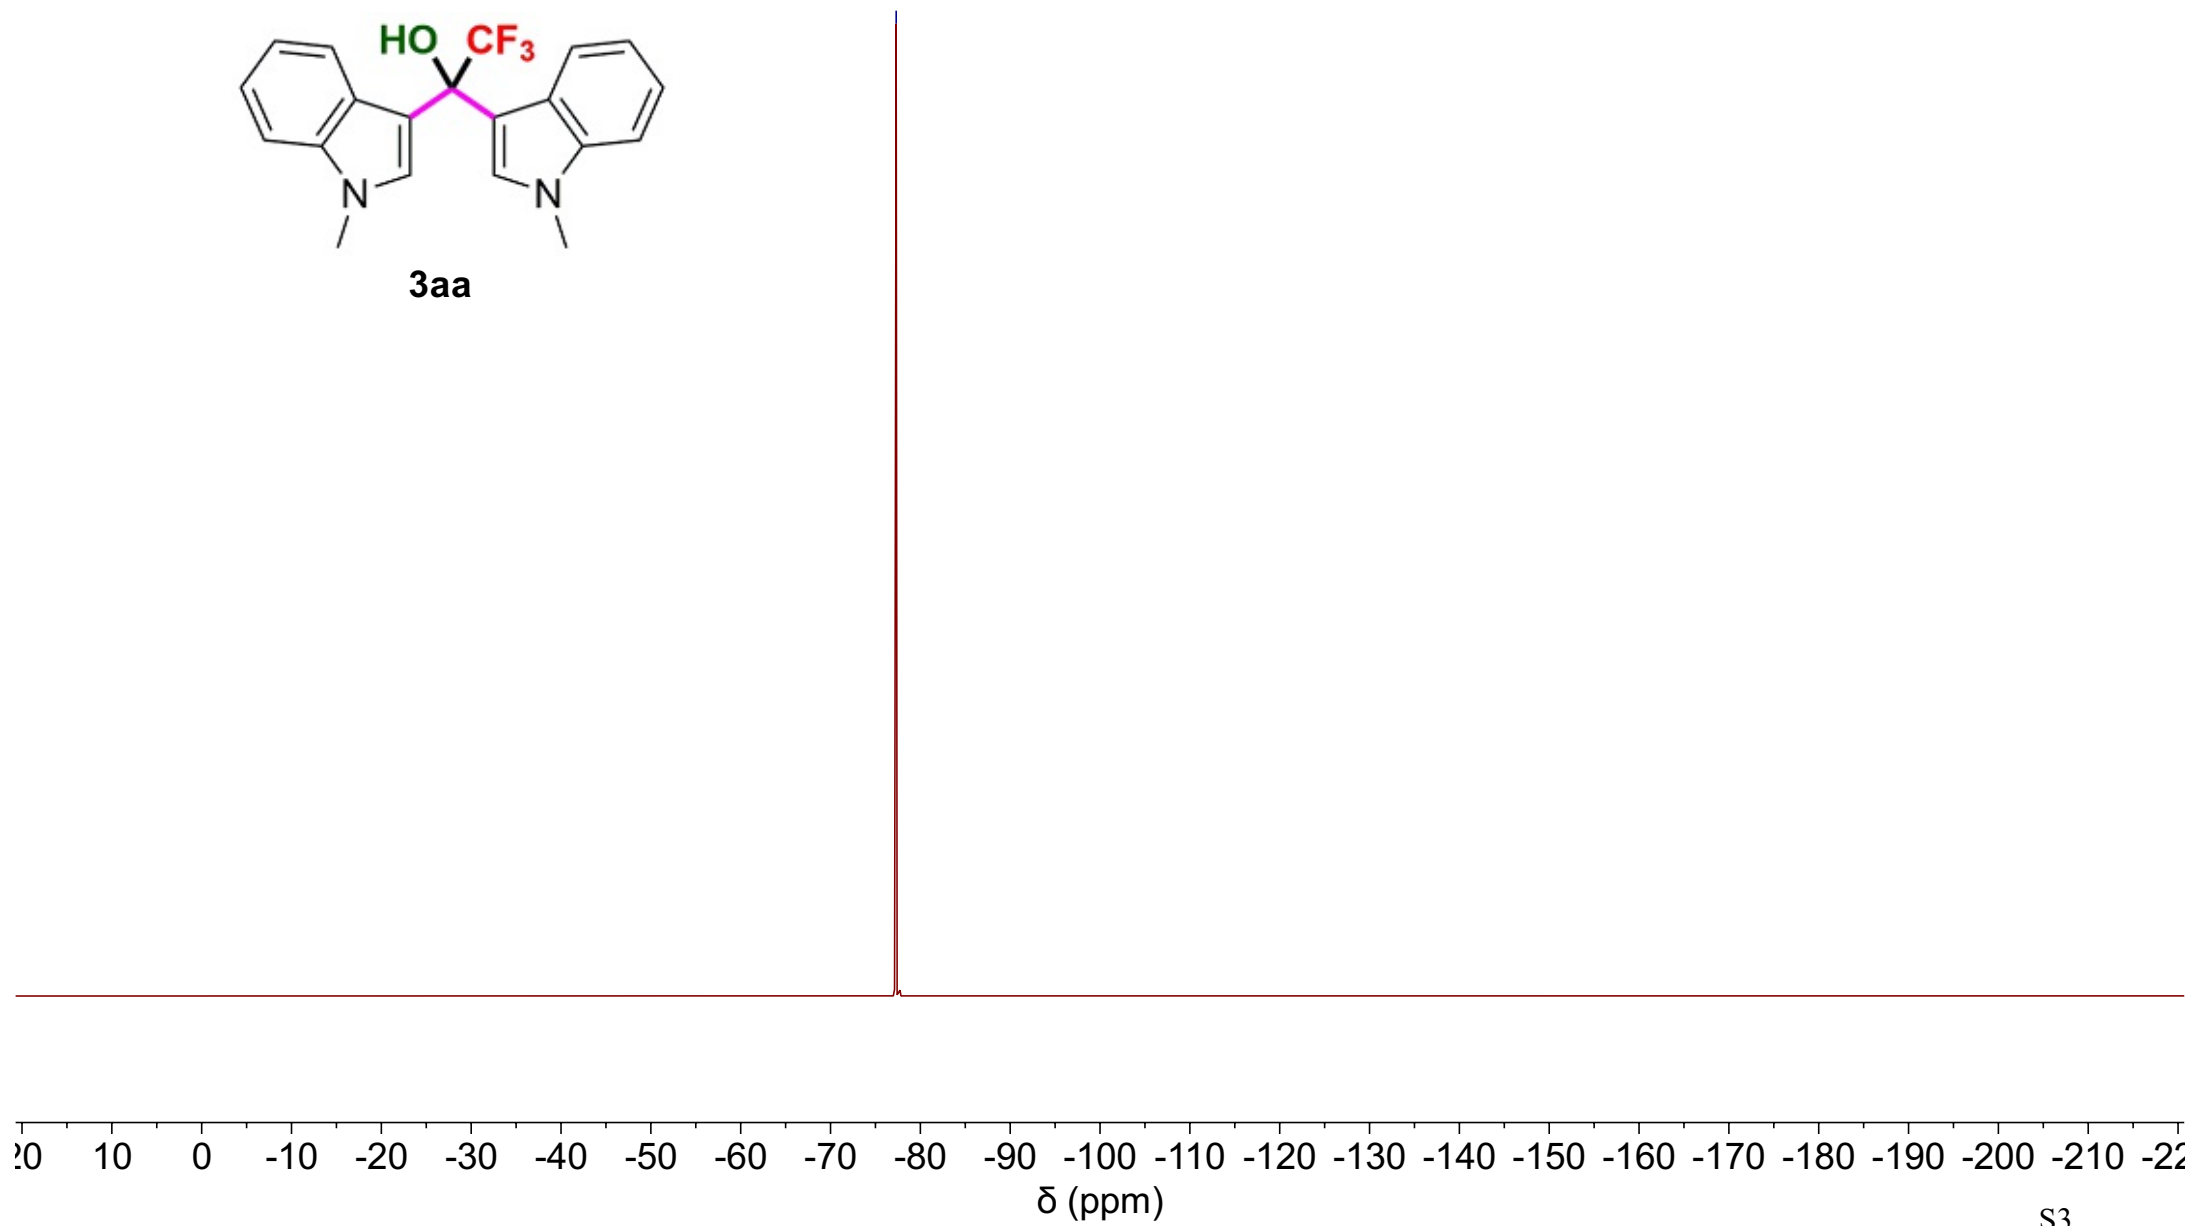

7.710 7.689 7.412 7.391 7.364 7.345 7.327 7.300 7.281 7.264 7.199 7.181 7.161 6.983 6.964 6.945 6.751 6.733 6.552 5.017 3.664 3.657 3.646 3.640 3.628 3.622 3.610 3.605 ~3.128 2.060 2.055 2.050 2.044 2.039 1.005 0.988 0.970 -0.015

<sup>1</sup>H NMR (400 MHz, acetone-d<sub>6</sub>)

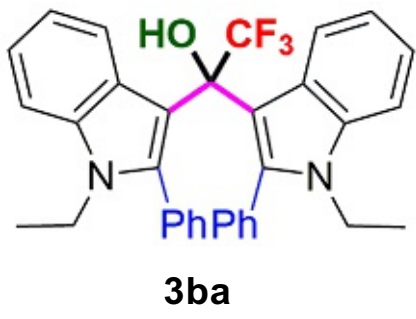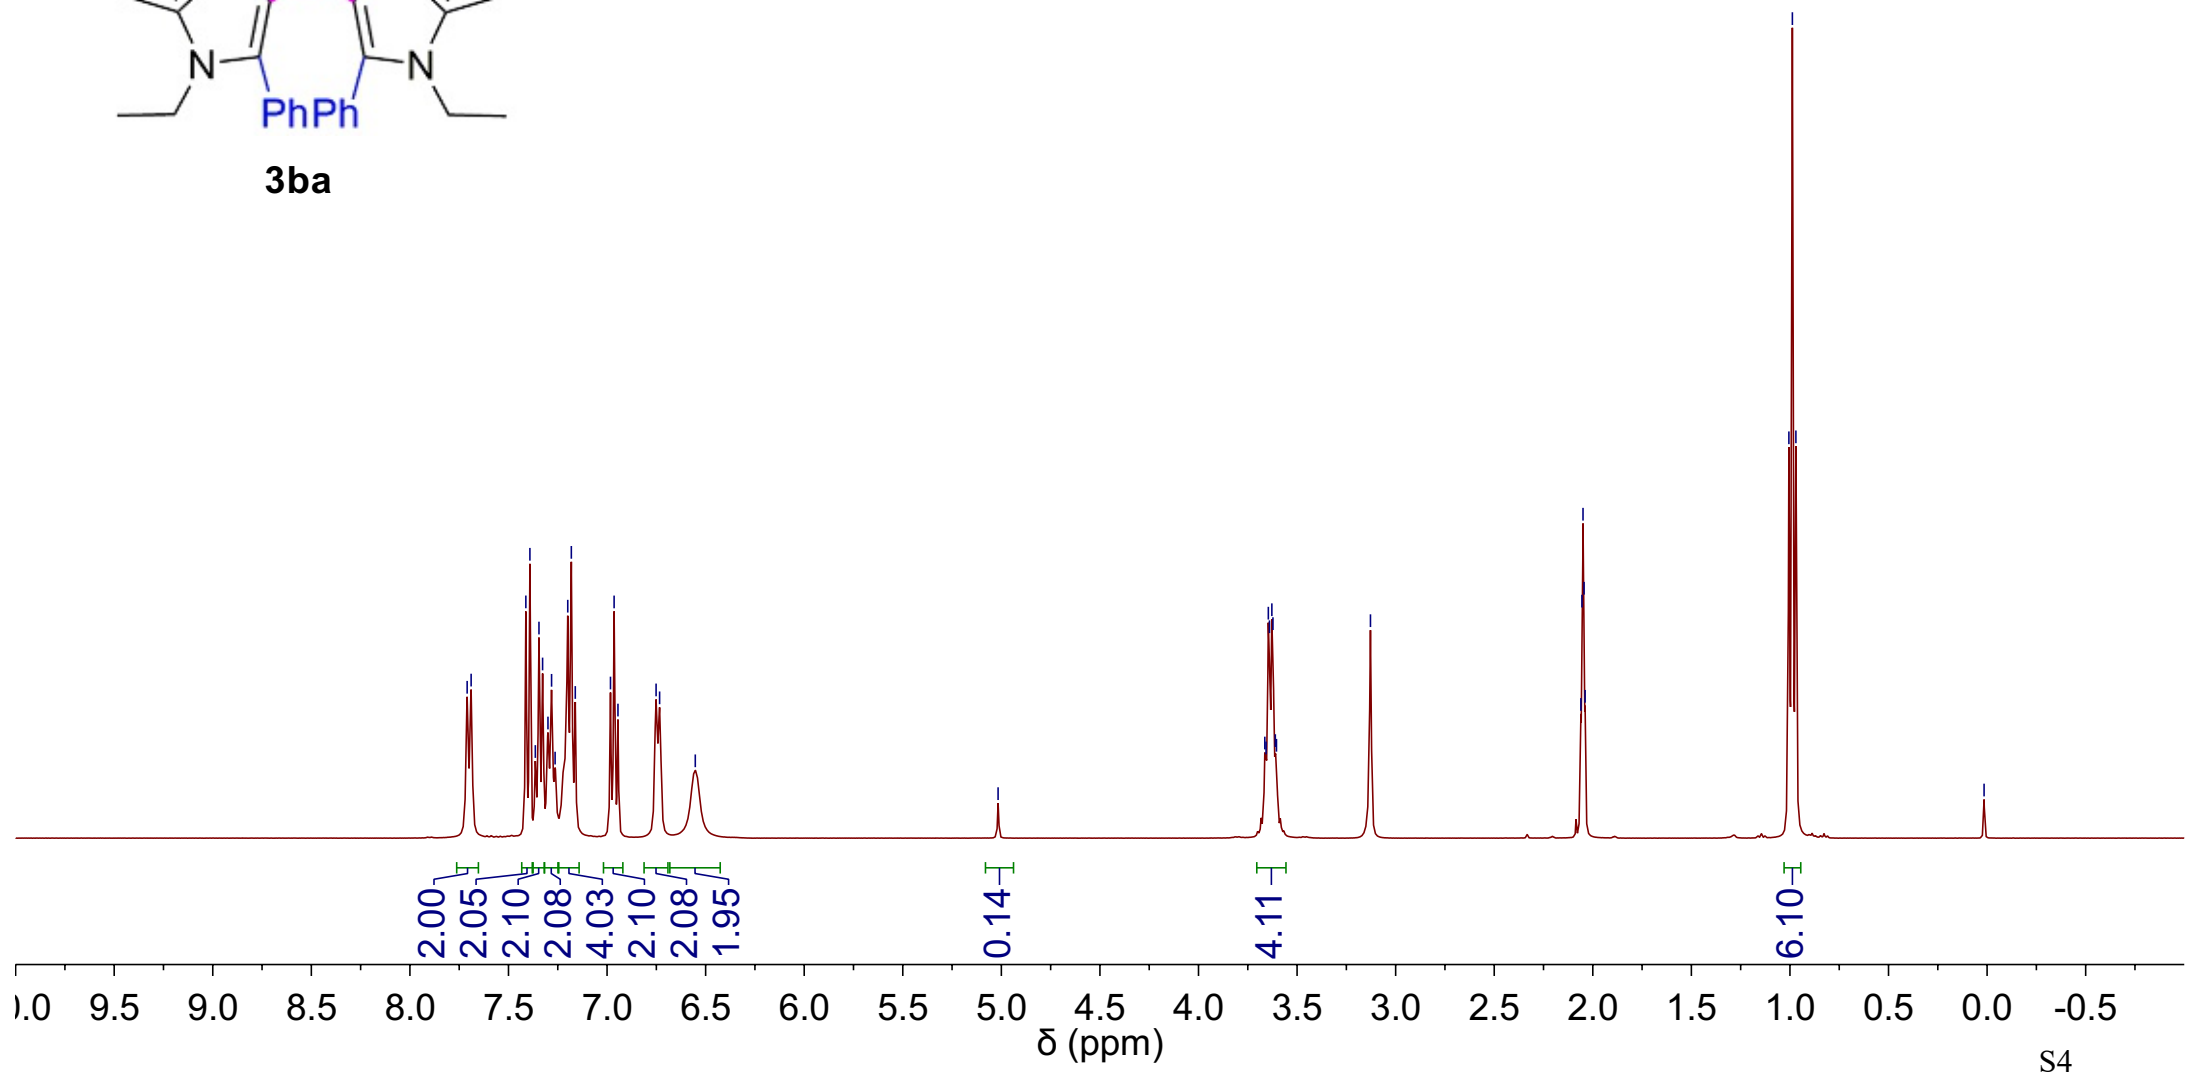

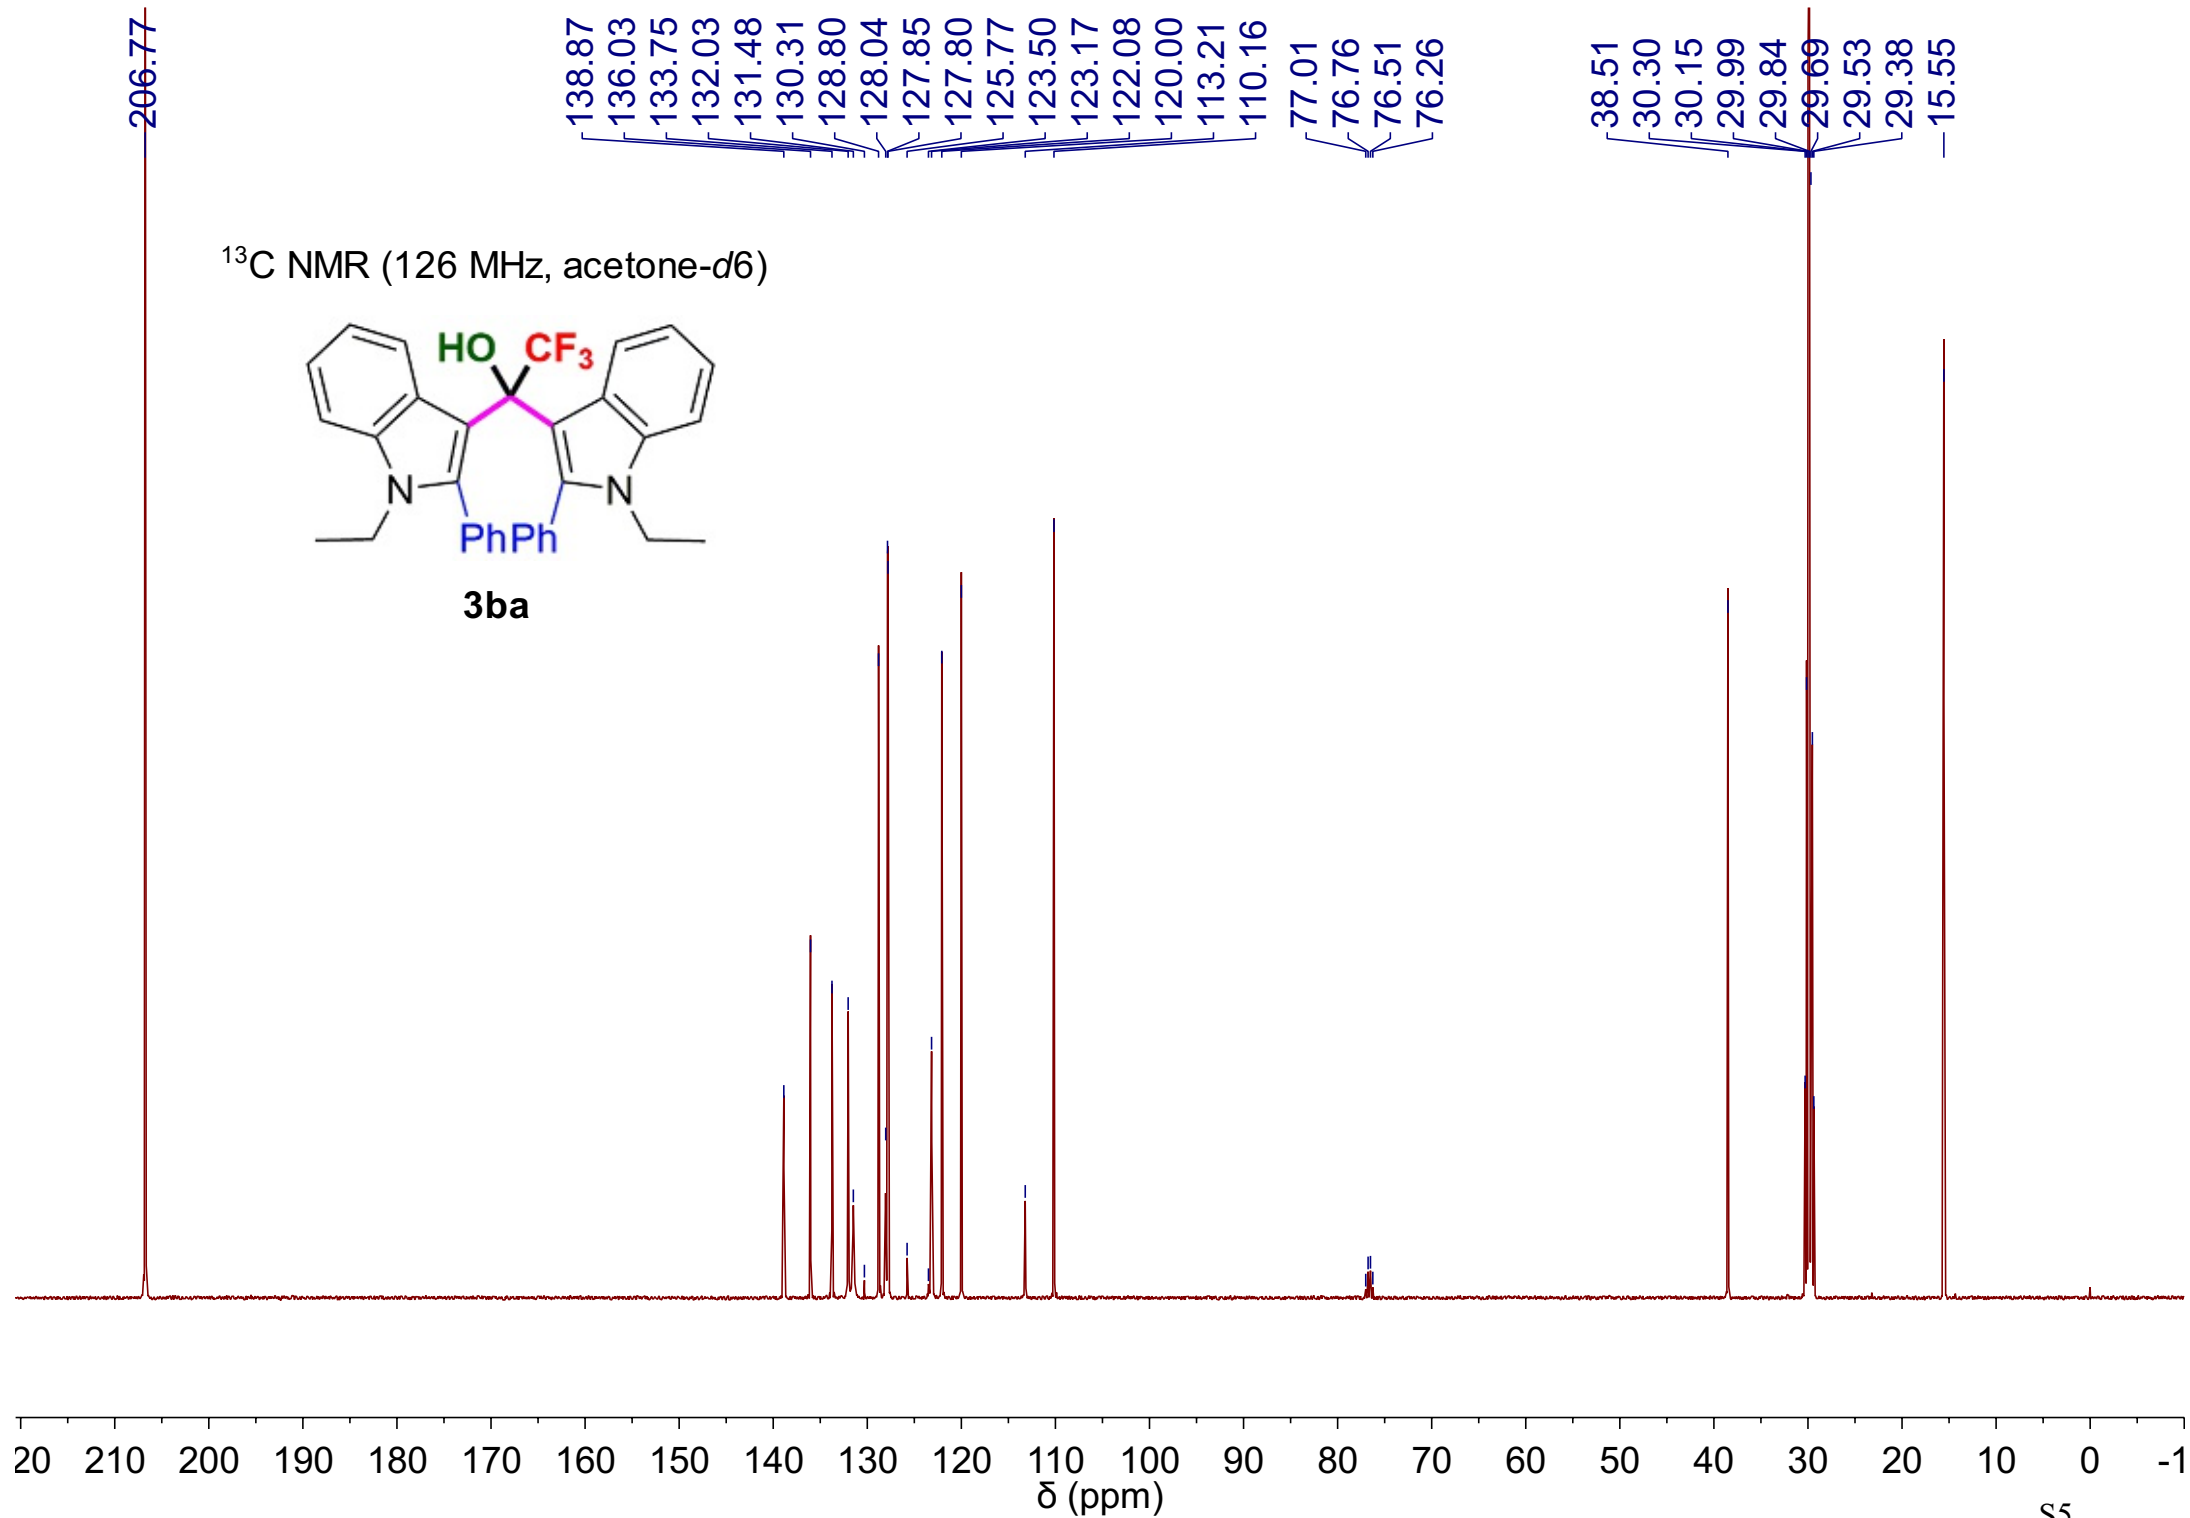

$^{19}\text{F}$  NMR (471 MHz, acetone- $d_6$ )

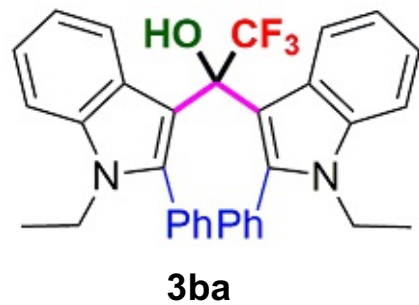

--74.35

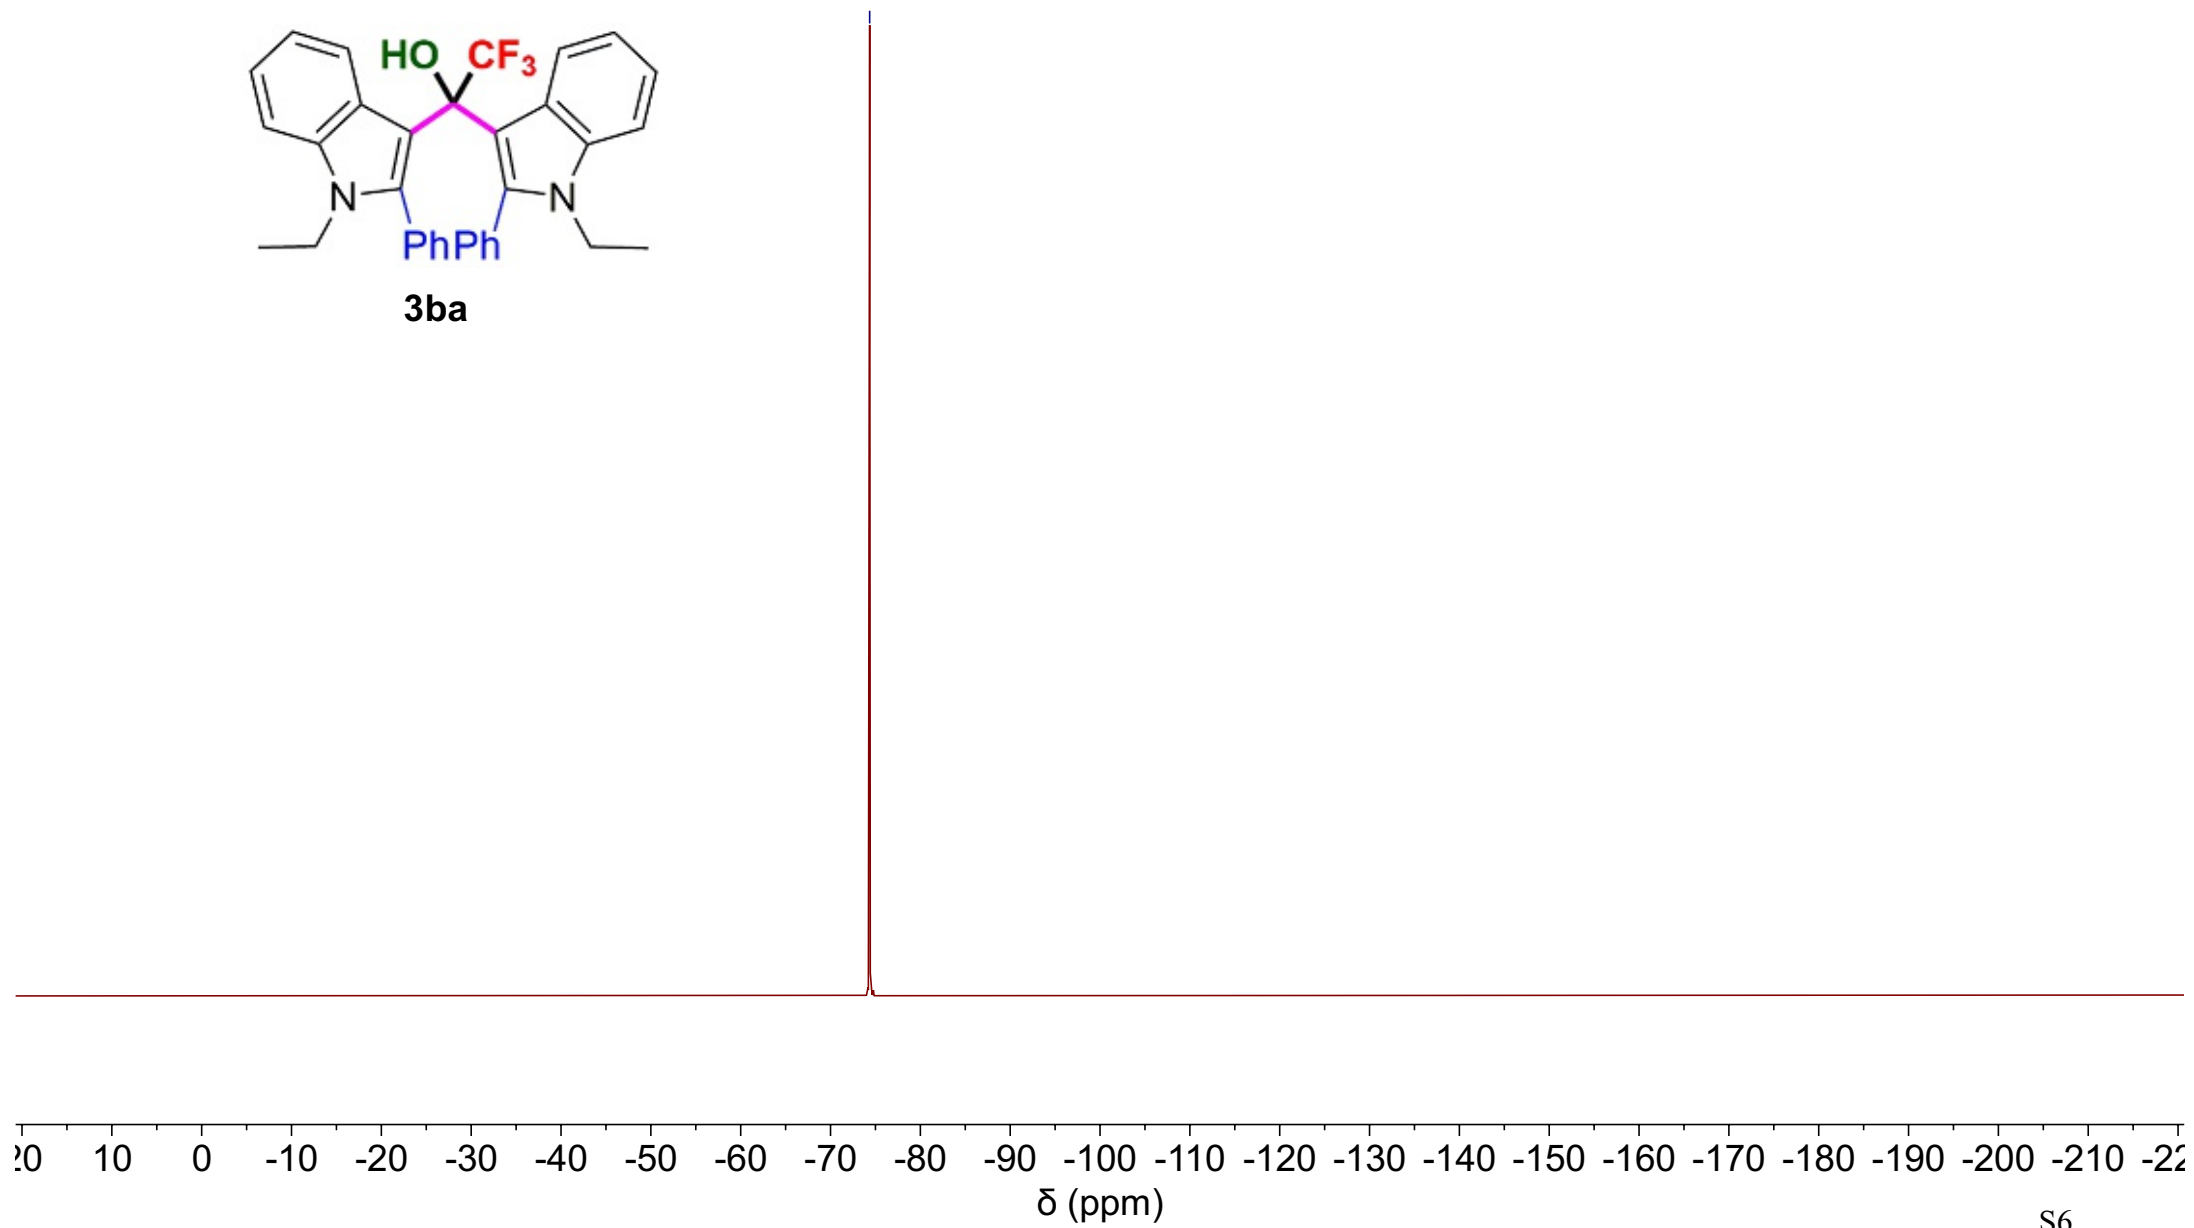

7.354  
7.247  
7.227  
7.202  
6.948  
6.927

-3.801

-2.840

-2.242

-2.050

-0.005

<sup>1</sup>H NMR (400 MHz, acetone-*d*<sub>6</sub>)

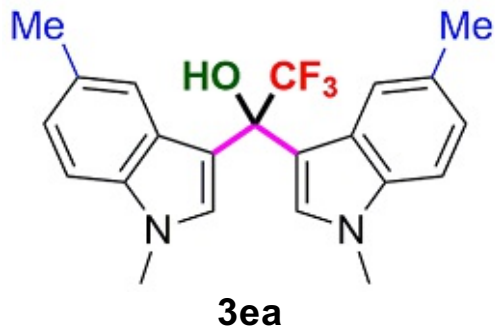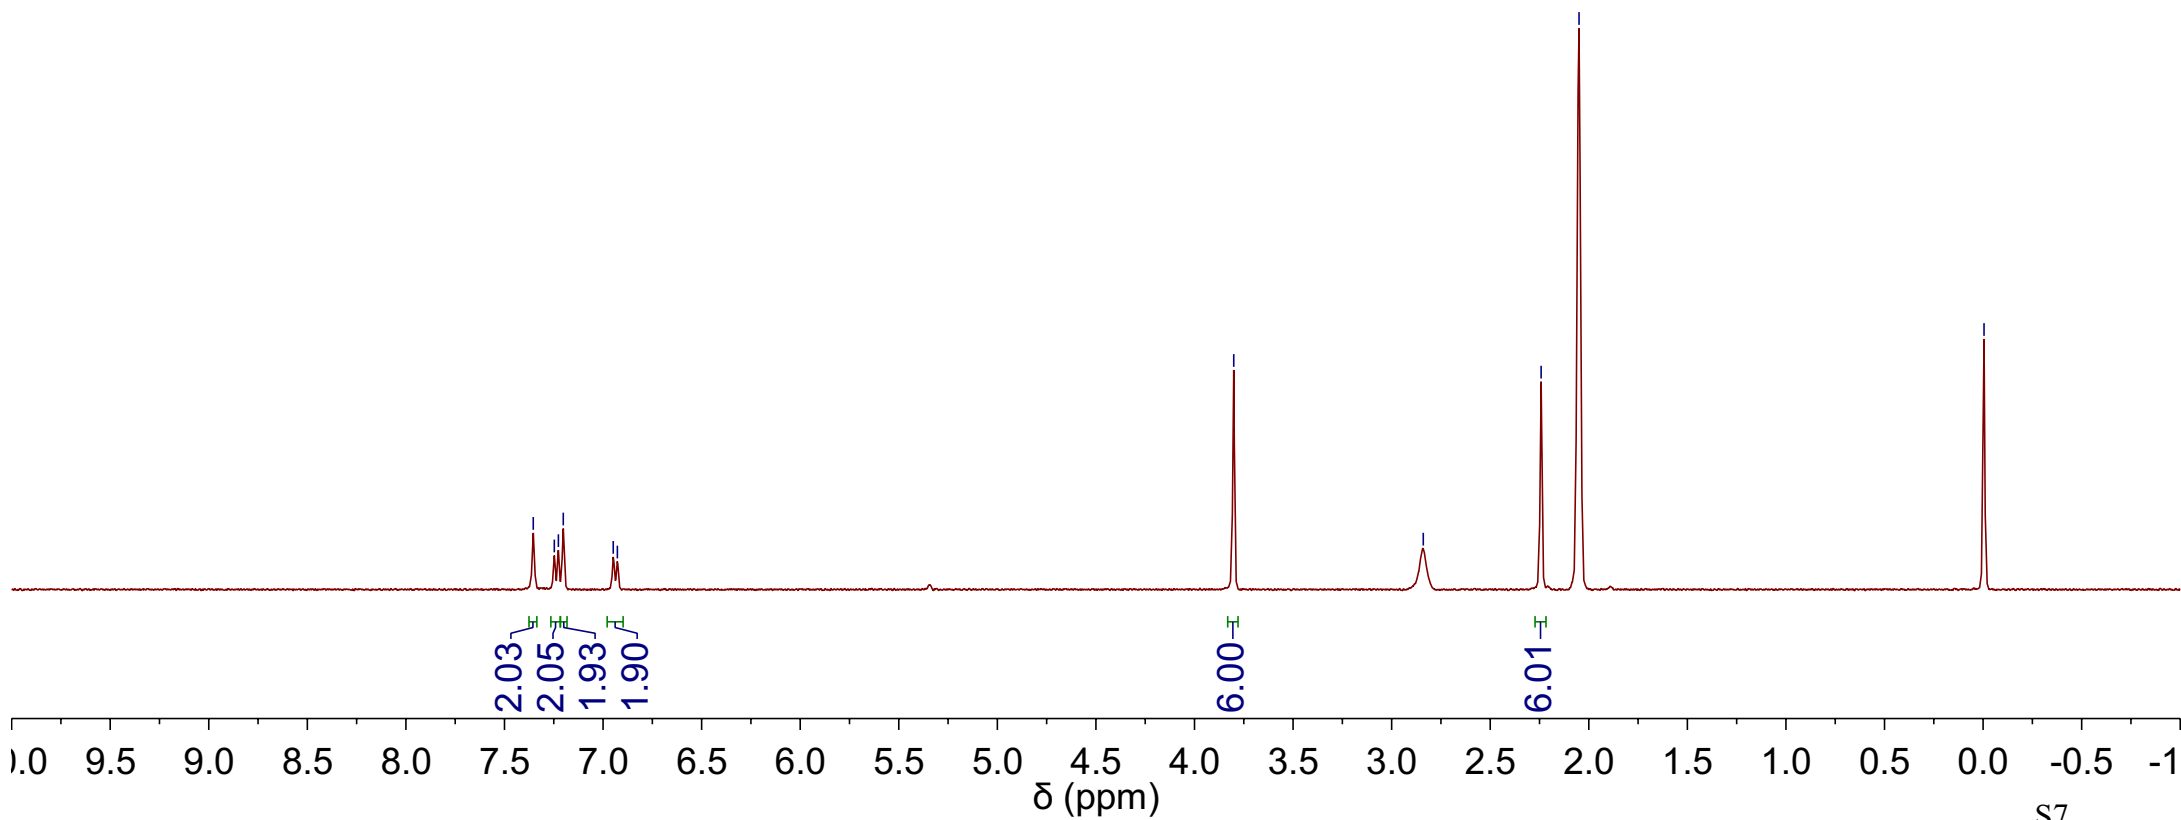



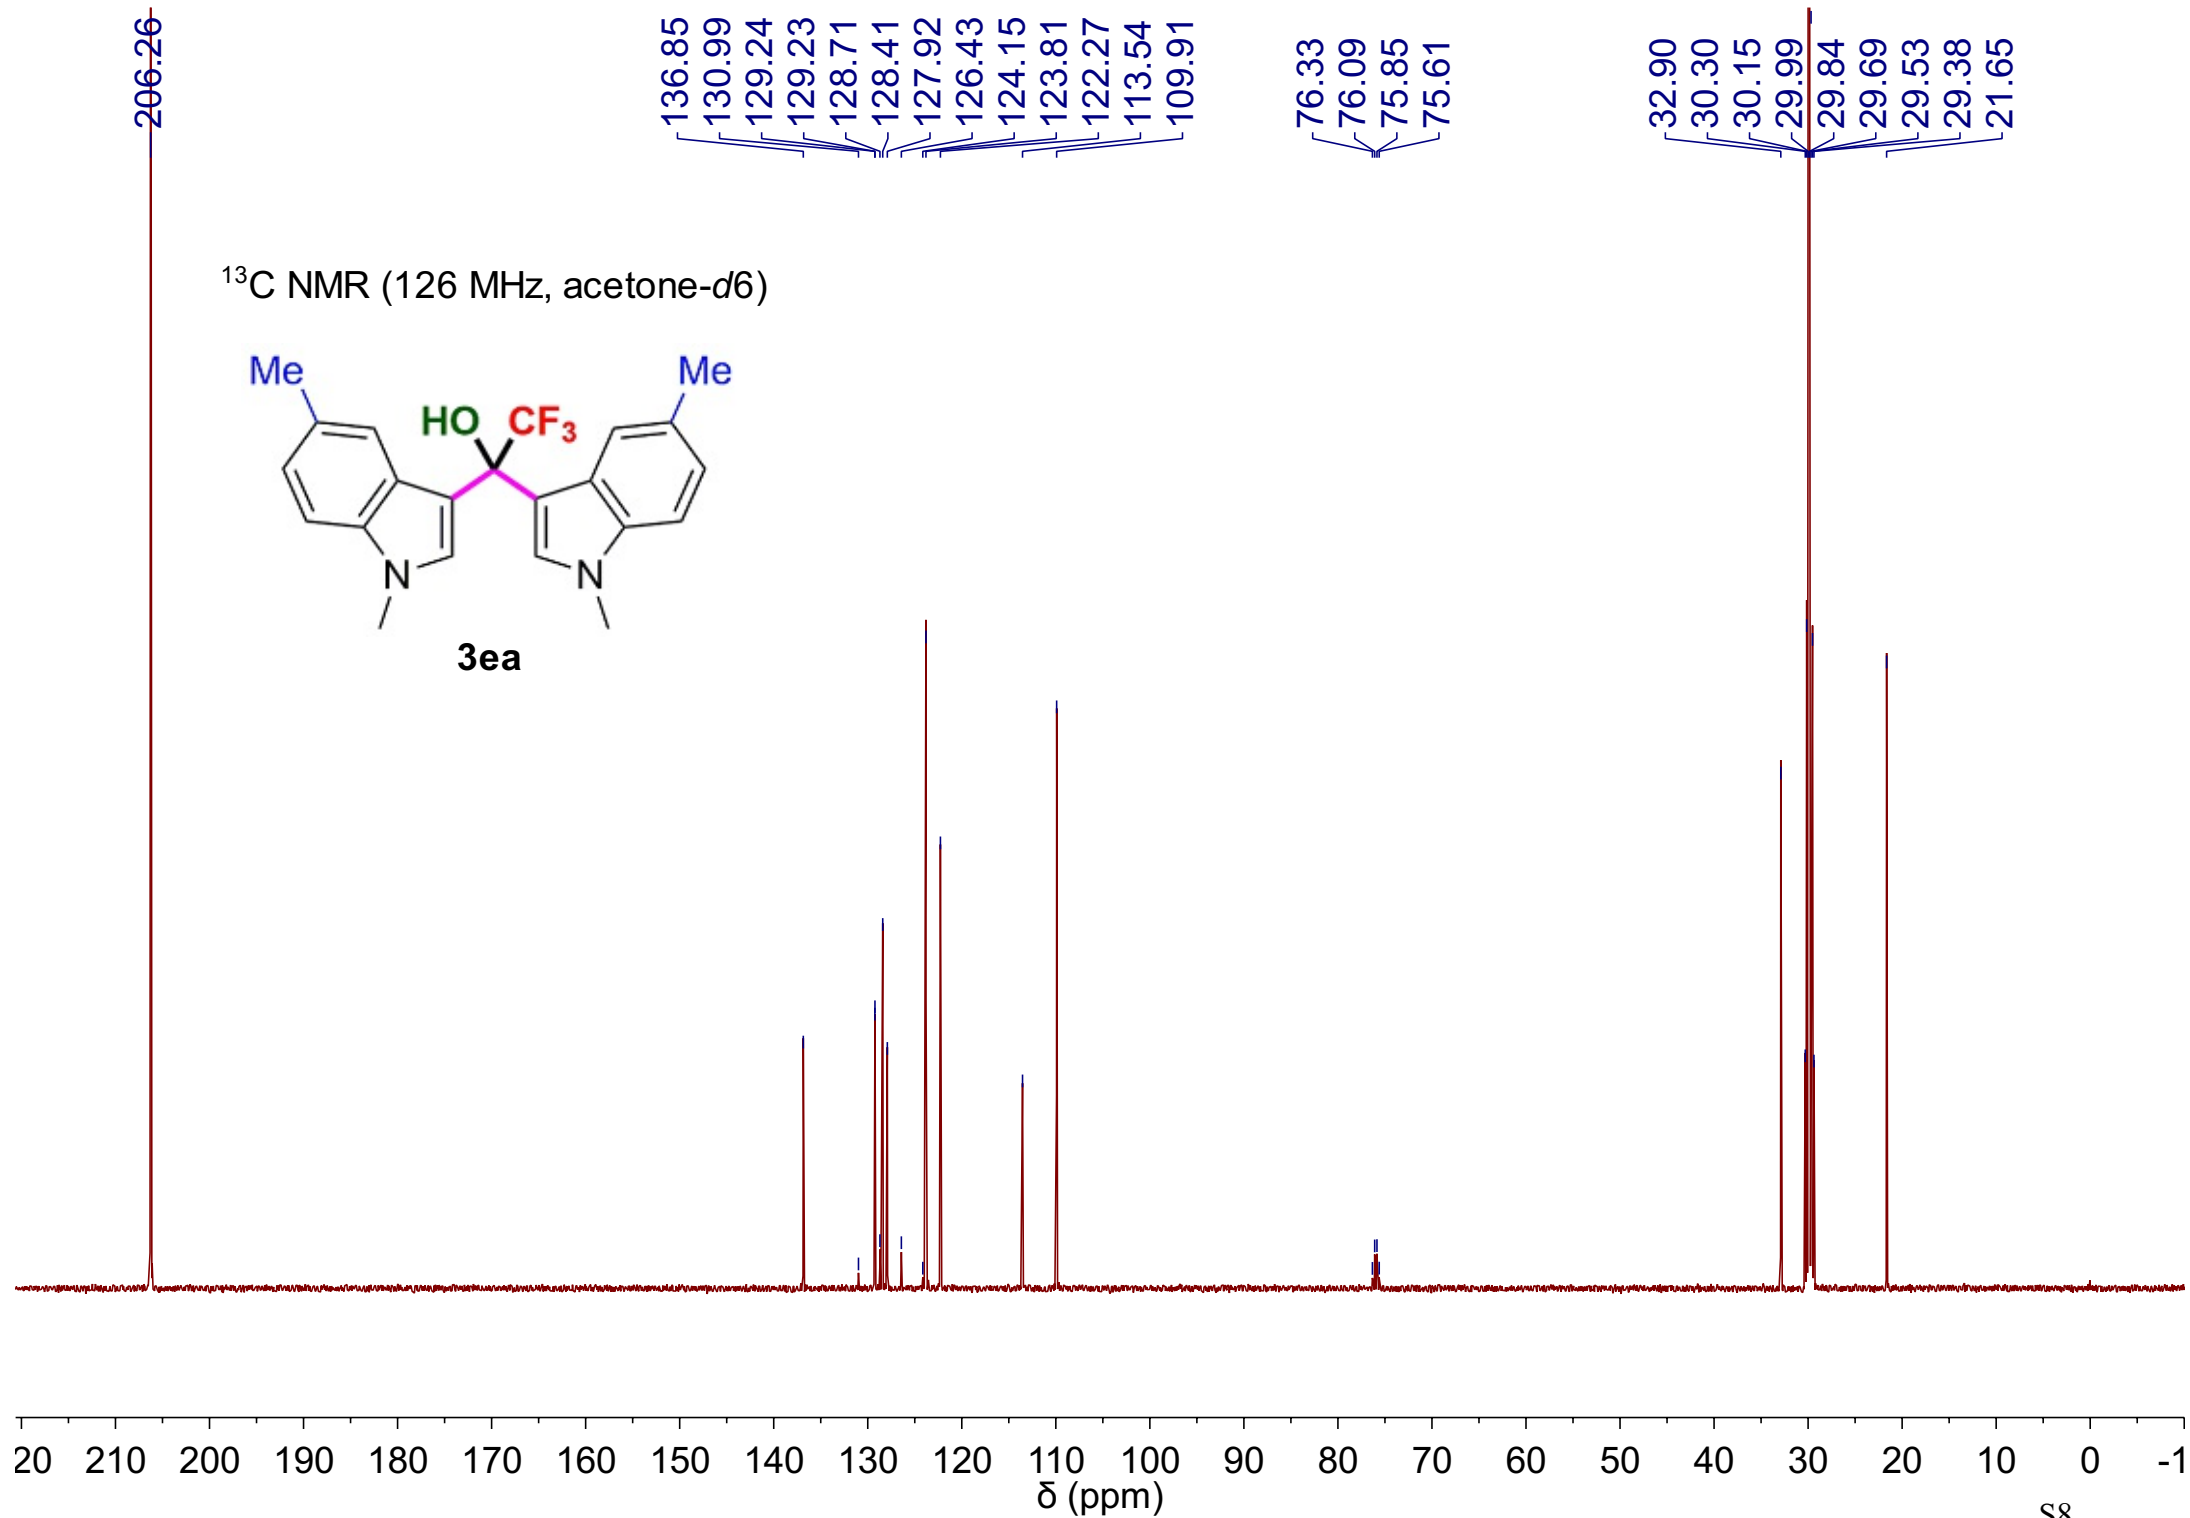

$^{19}\text{F}$  NMR (471 MHz, acetone- $d_6$ )

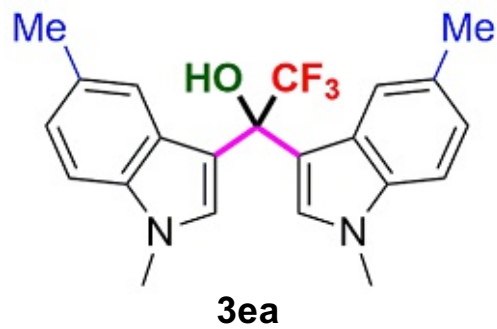

--77.31

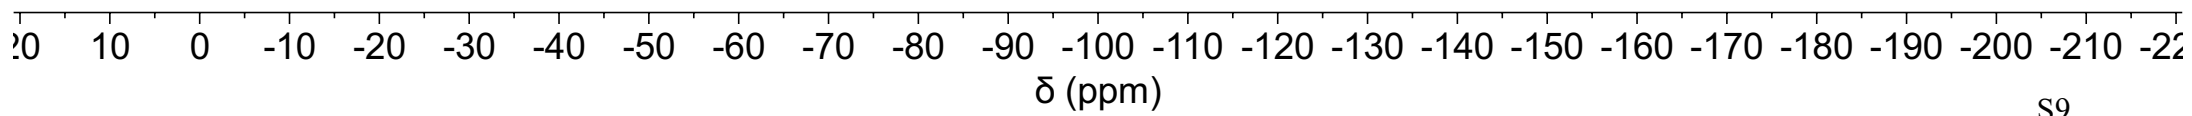

<sup>1</sup>H NMR (500 MHz, acetone-*d*<sub>6</sub>)

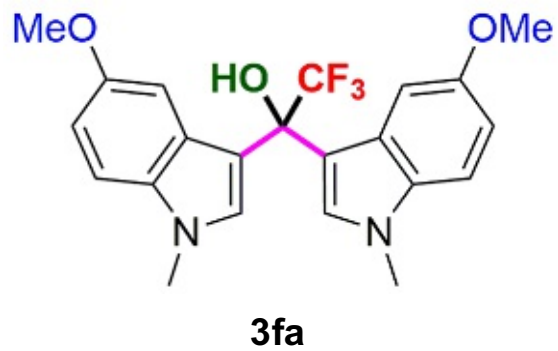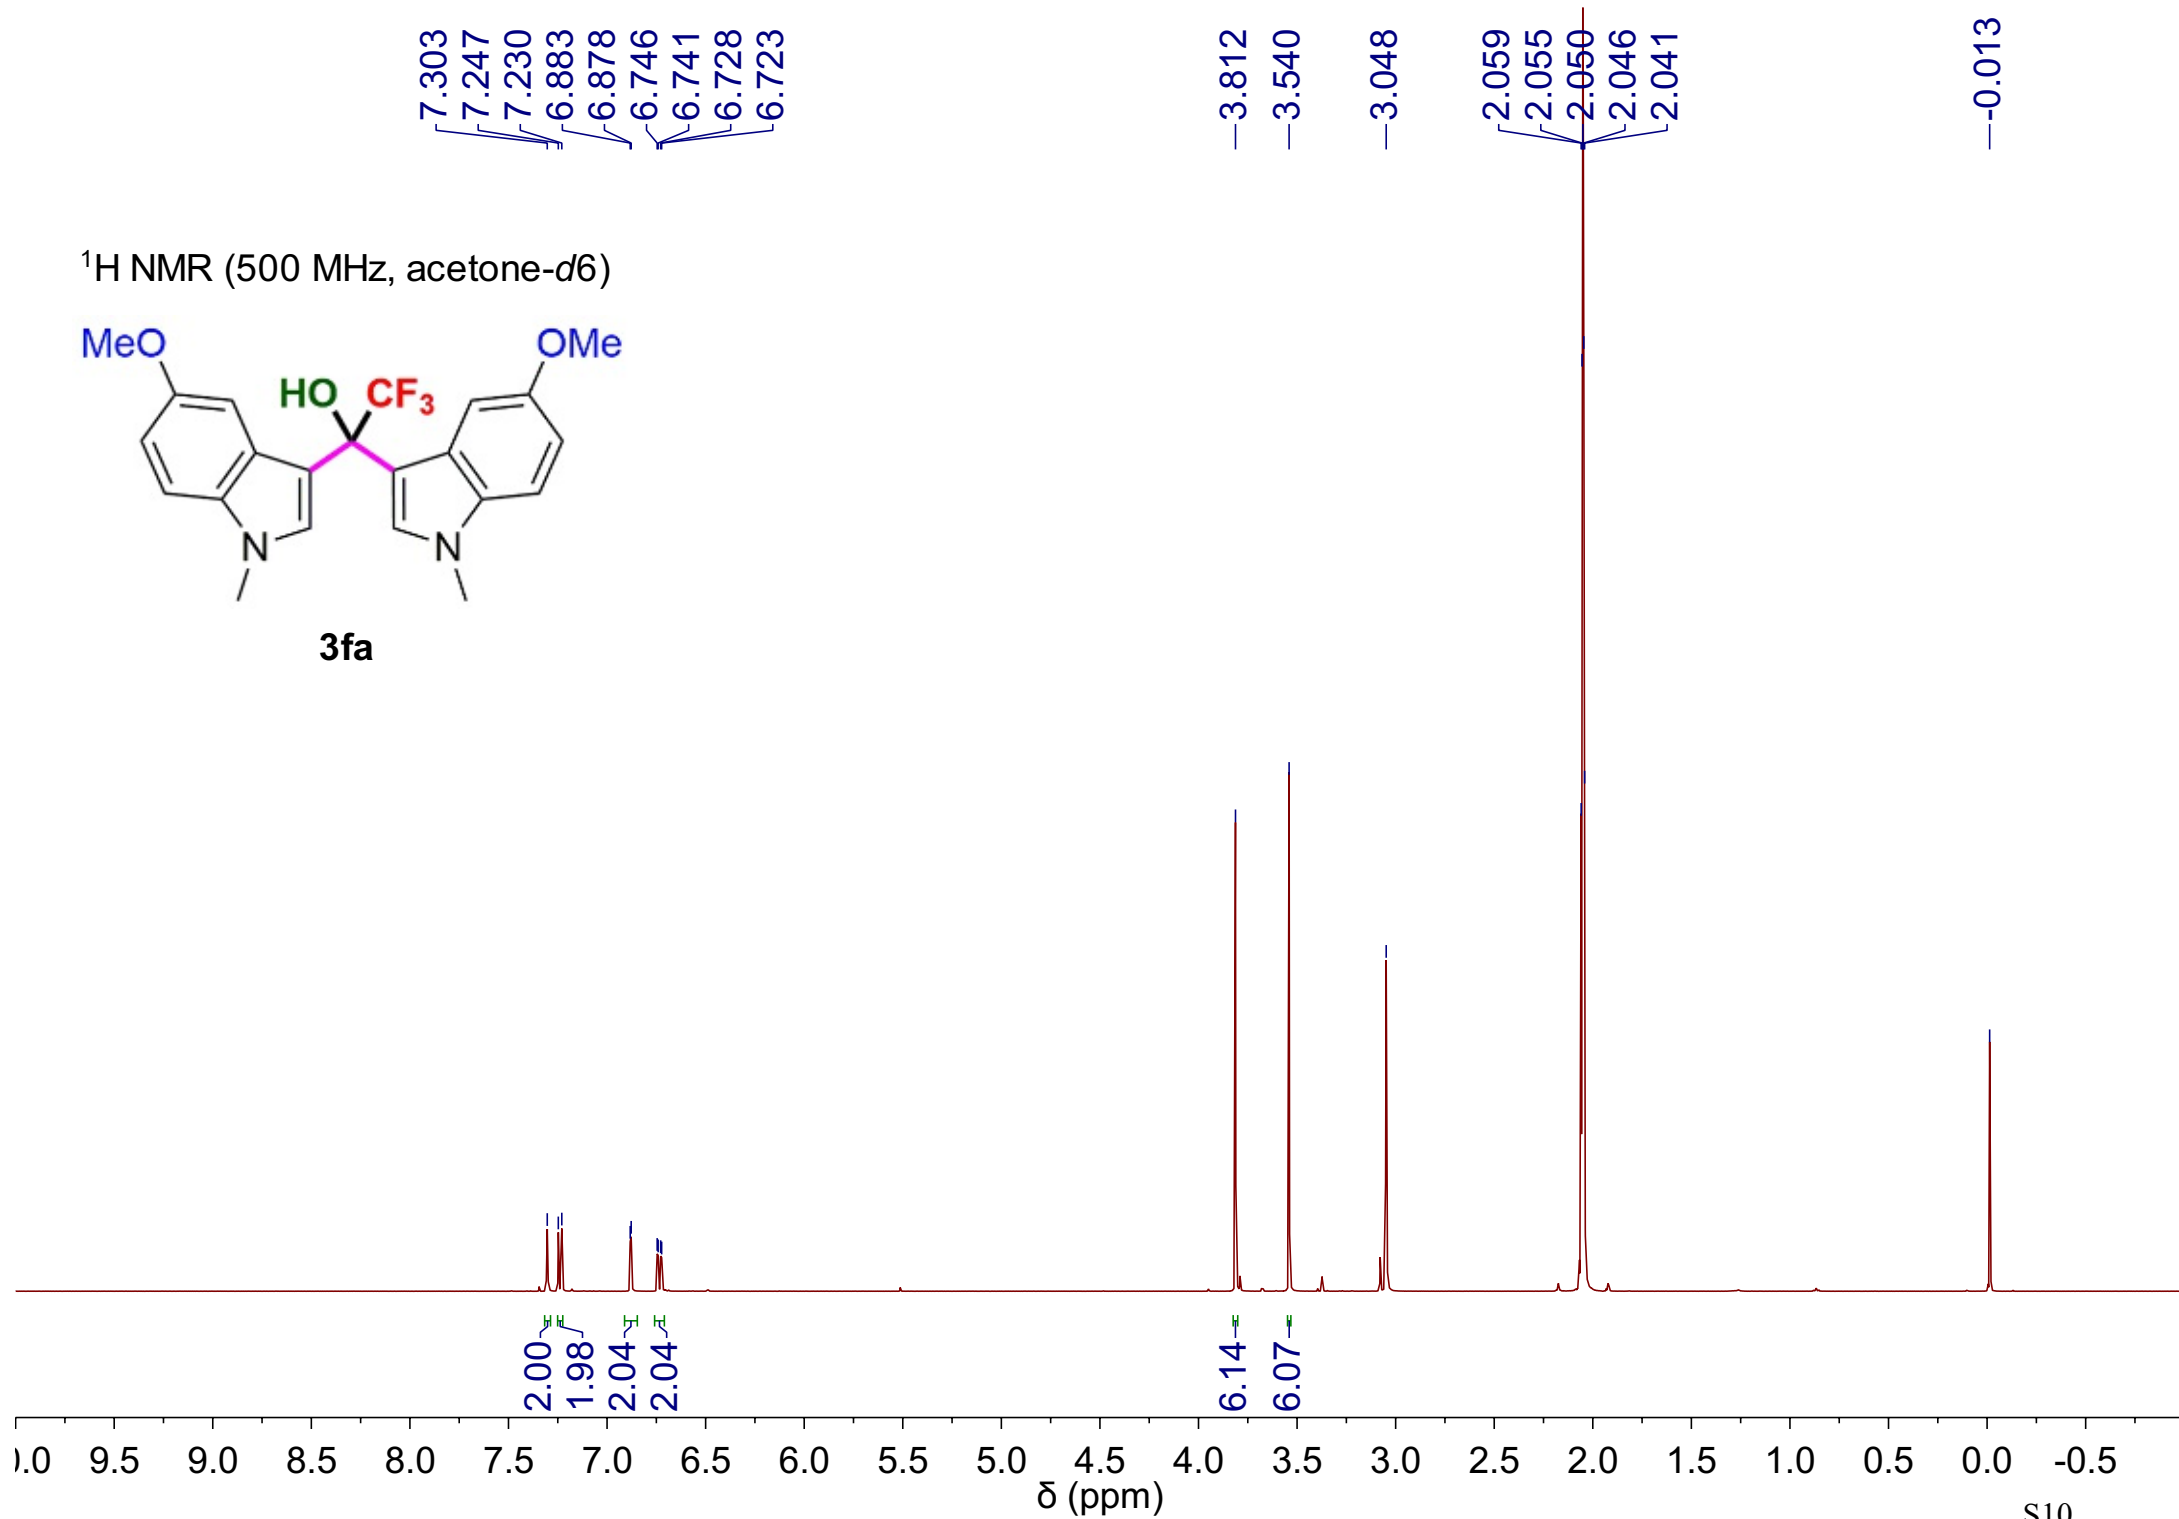

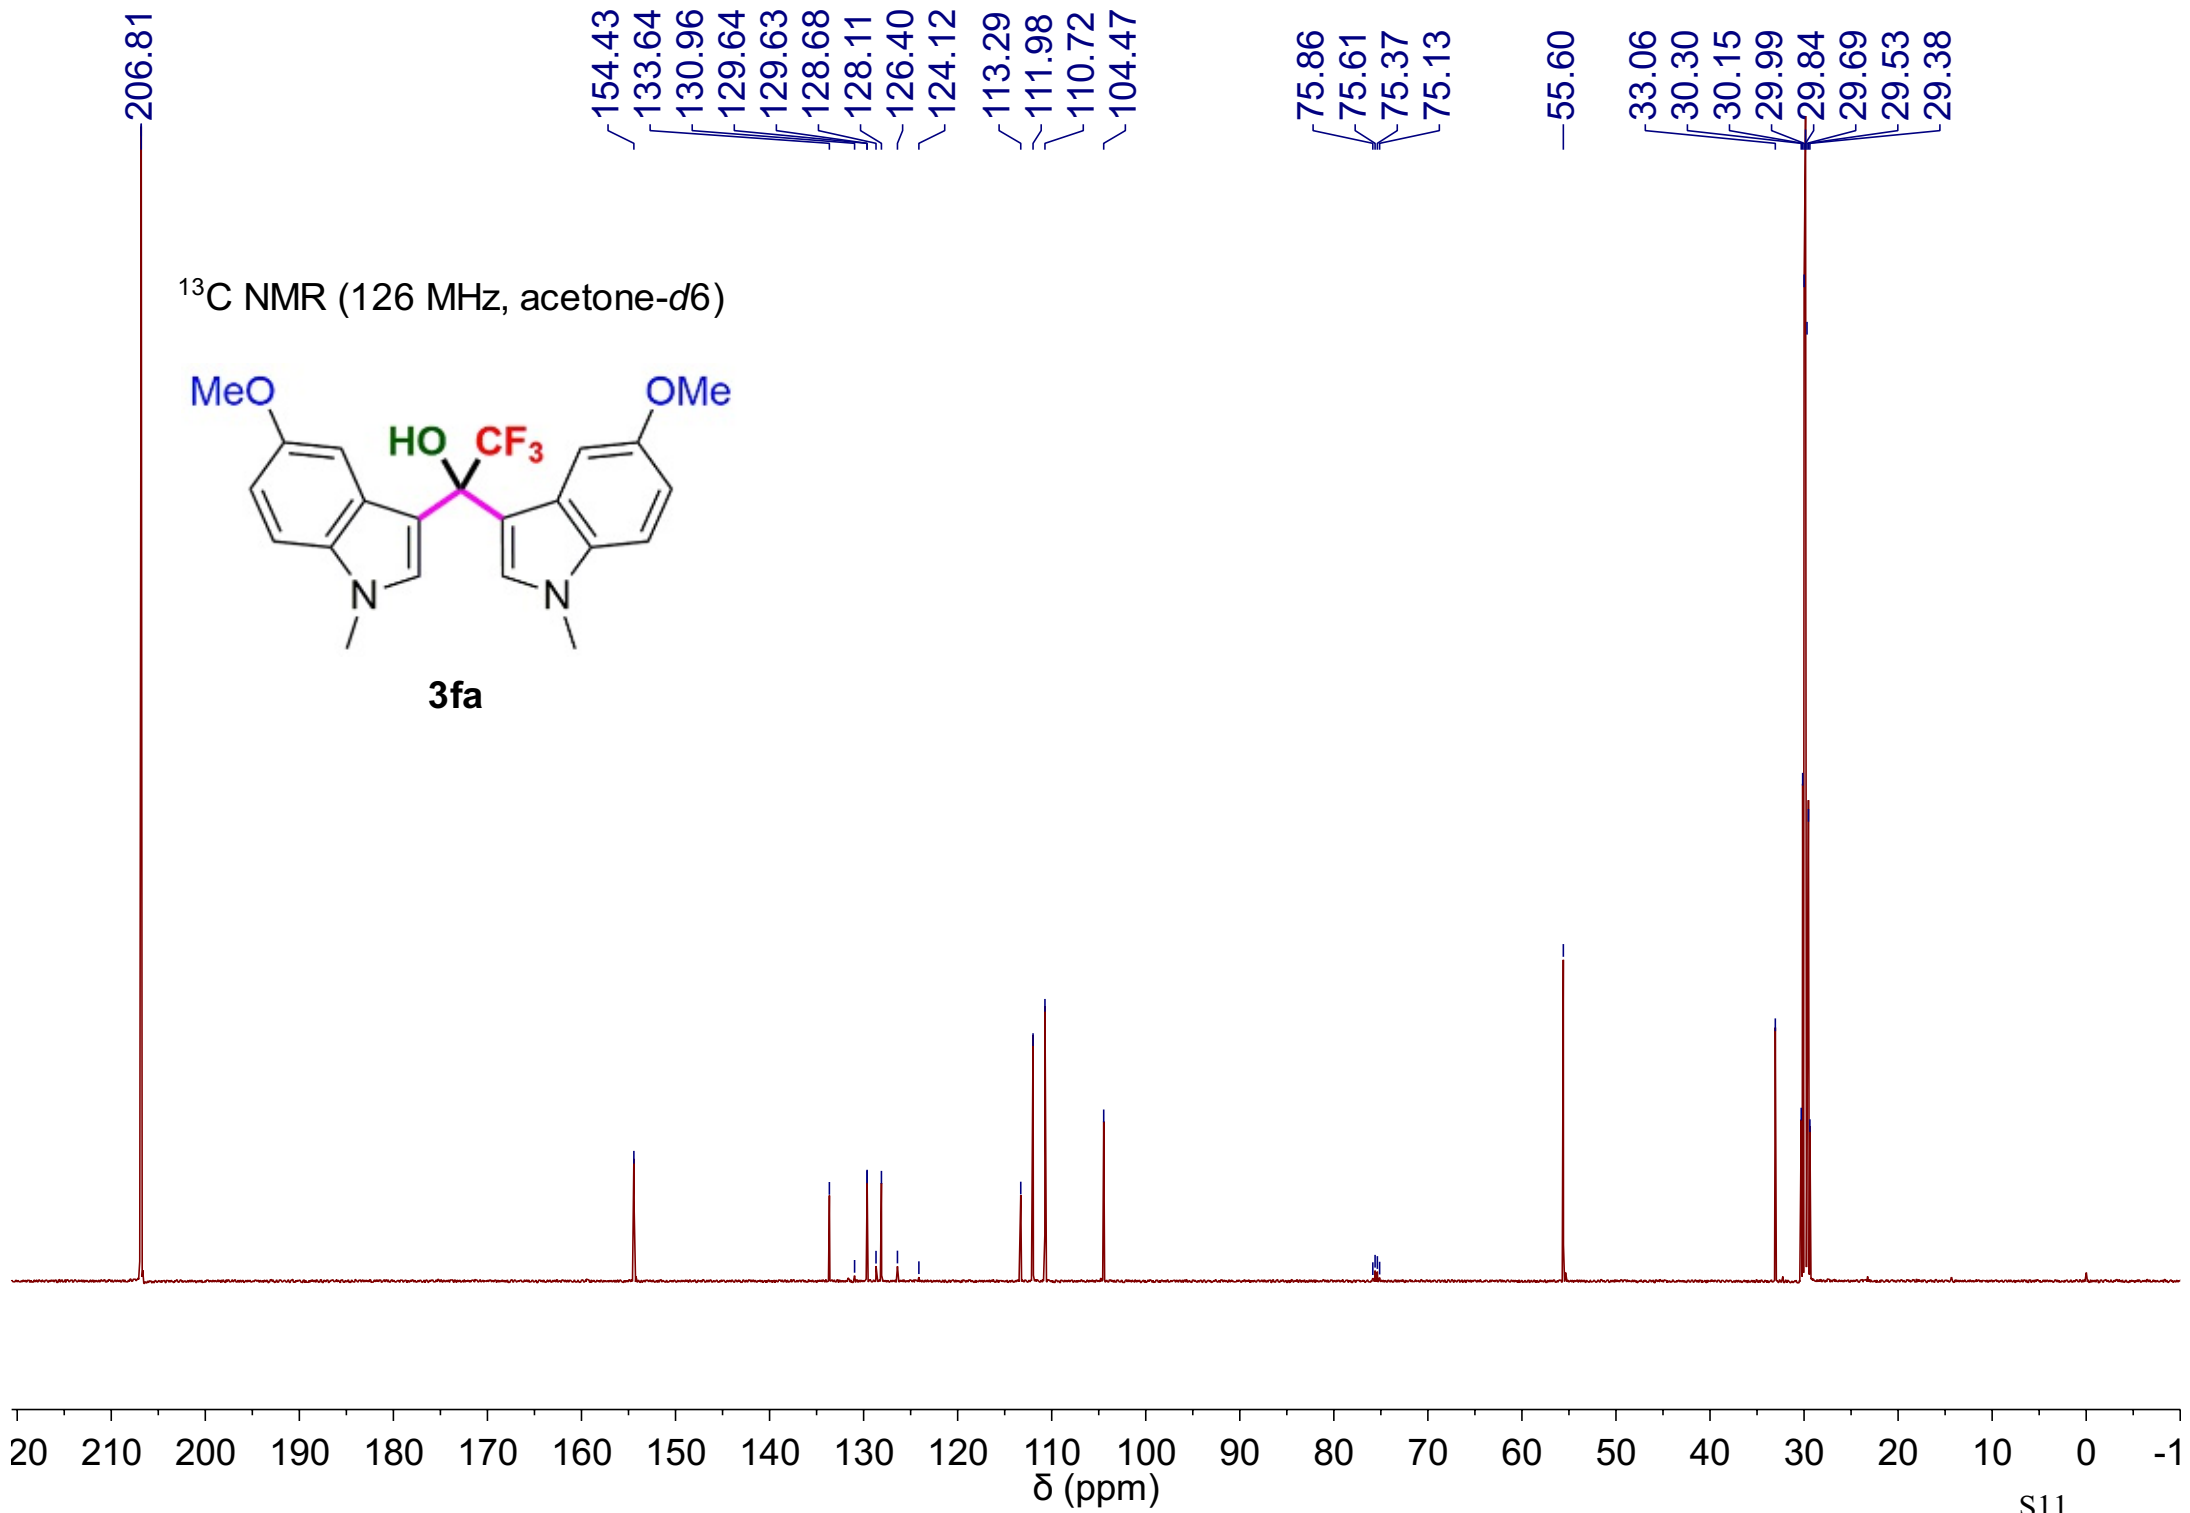

$^{19}\text{F}$  NMR (471 MHz, acetone- $d_6$ )

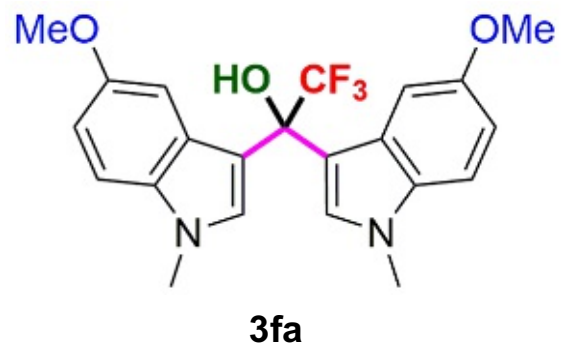

--77.36

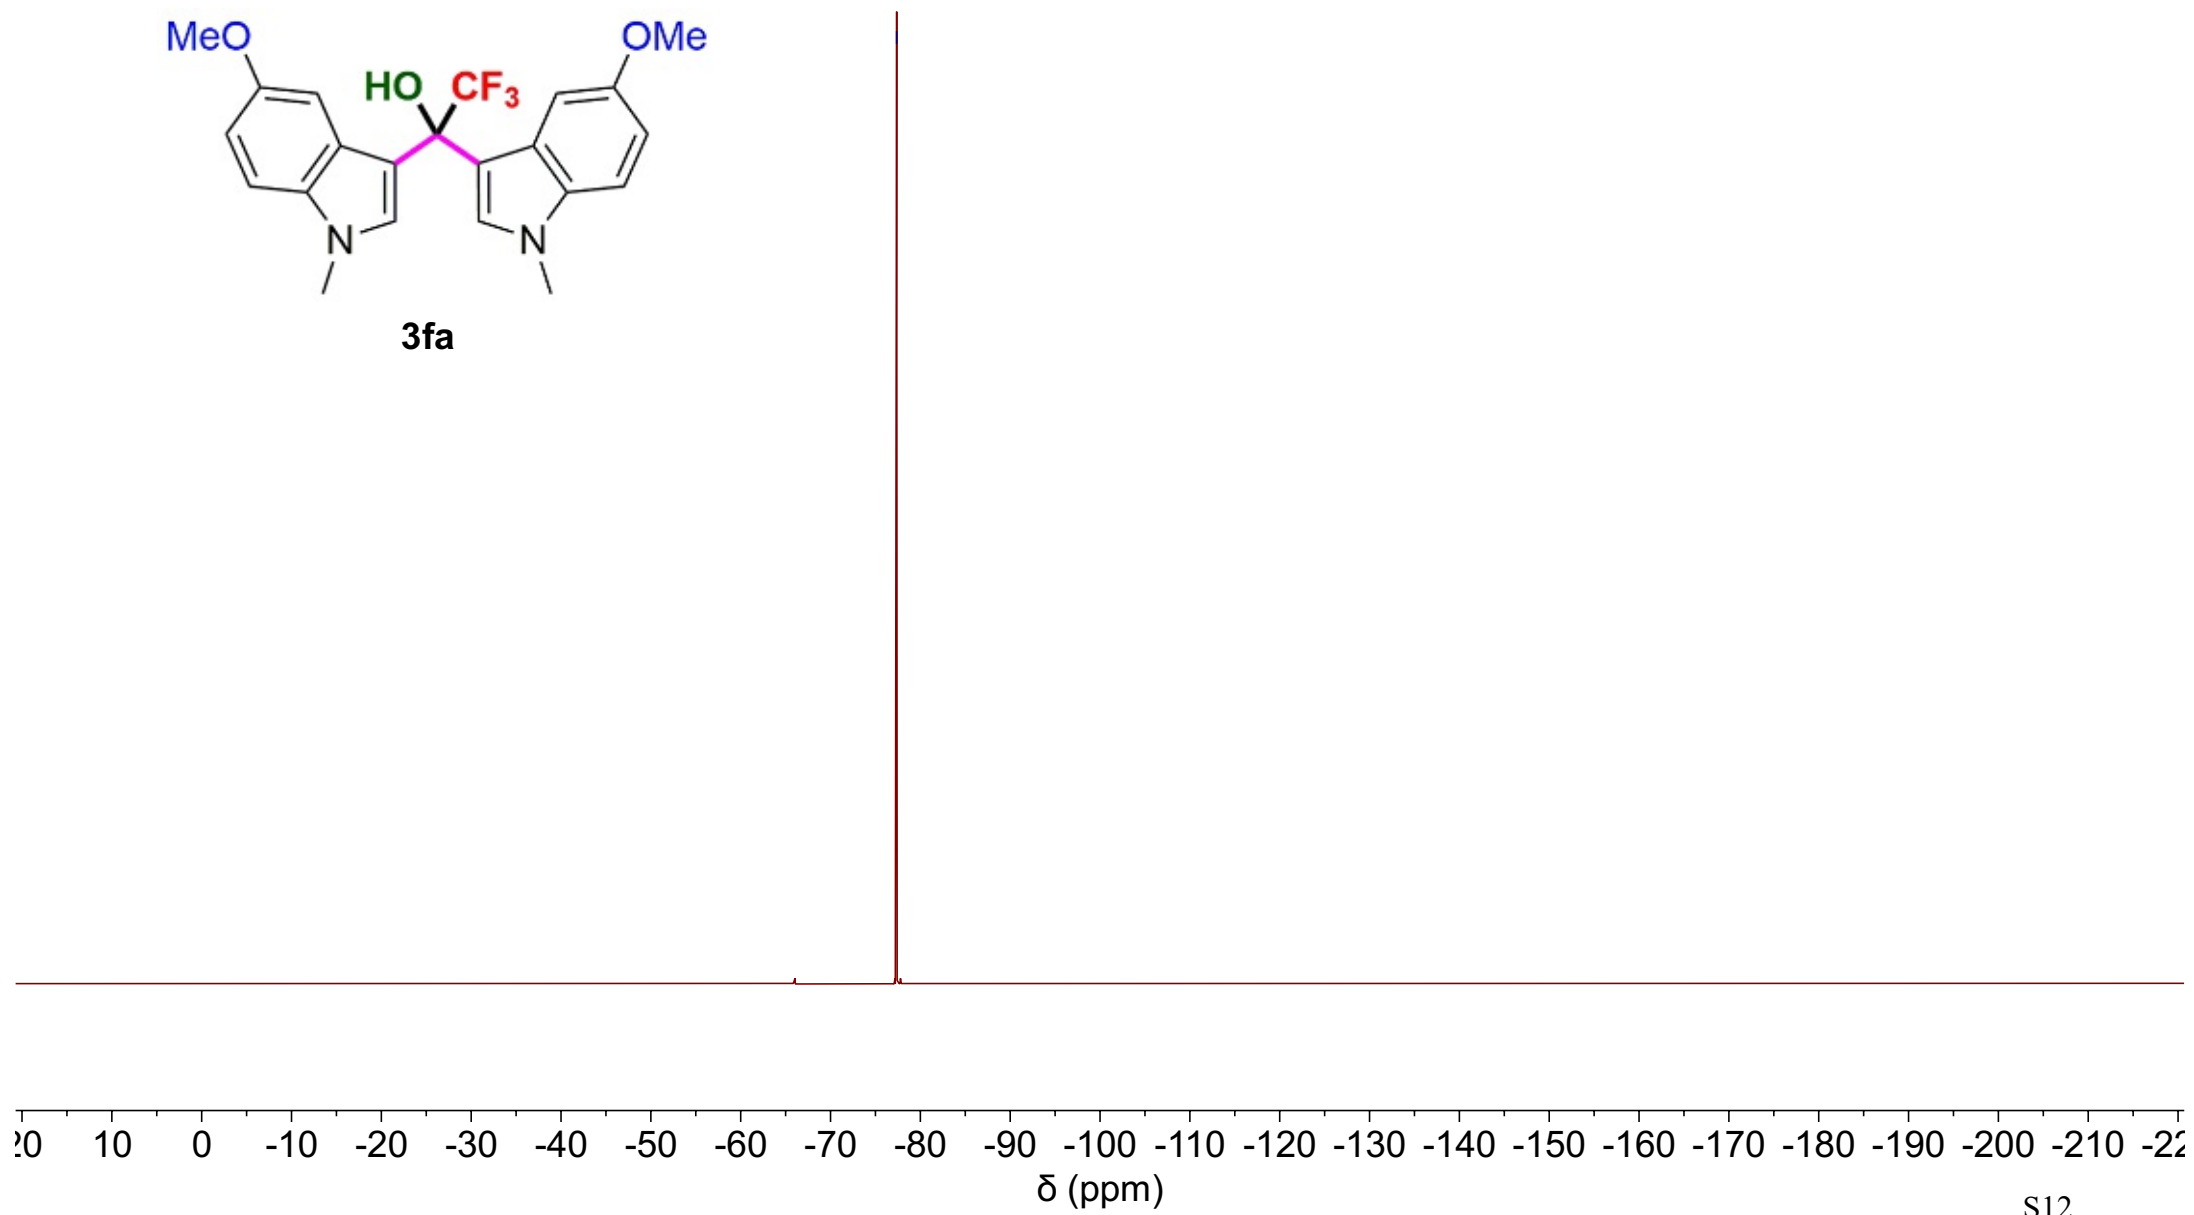

7.286  
7.266  
7.231  
7.132  
6.677  
6.657

-5.342

-3.803

2.851  
2.818  
2.363  
2.061  
2.055  
2.050  
2.044  
2.039

-0.003

<sup>1</sup>H NMR (400 MHz, acetone-*d*<sub>6</sub>)

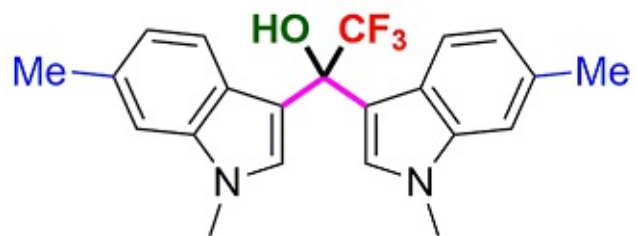

**3ga**

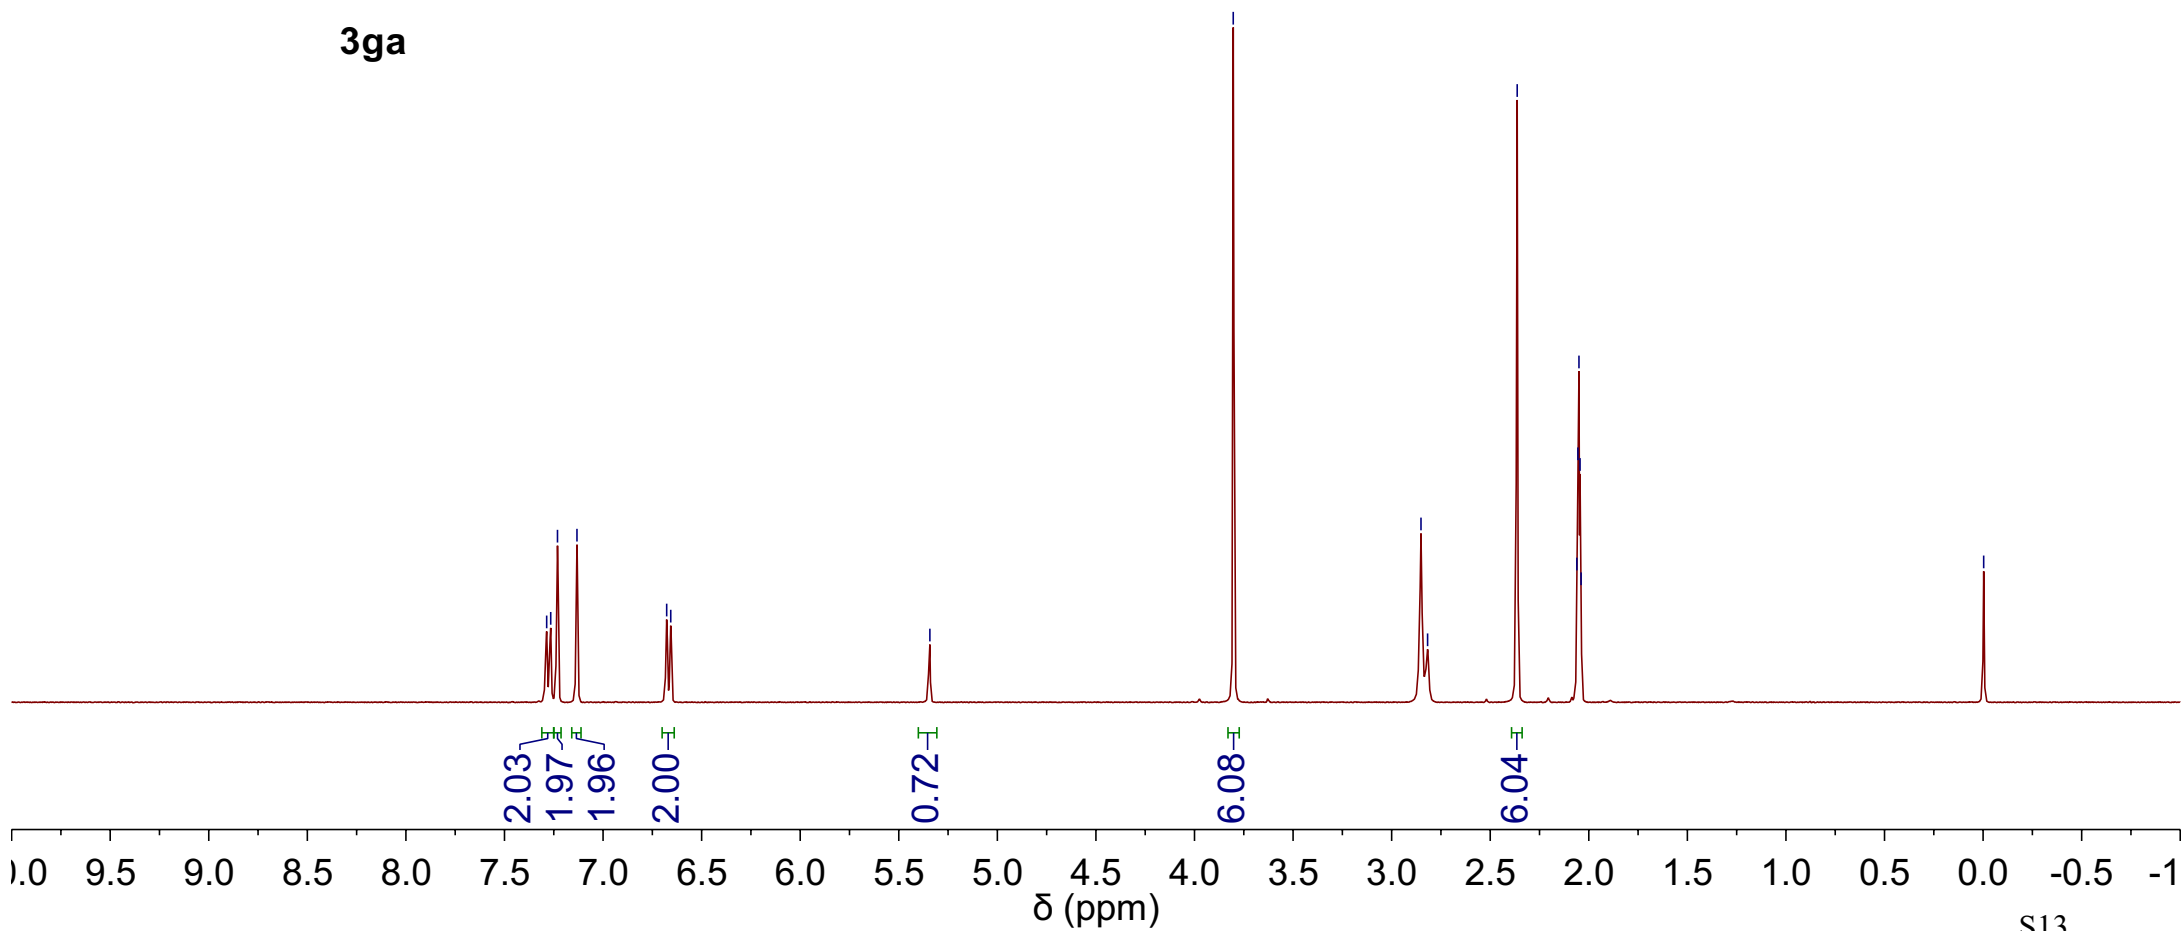

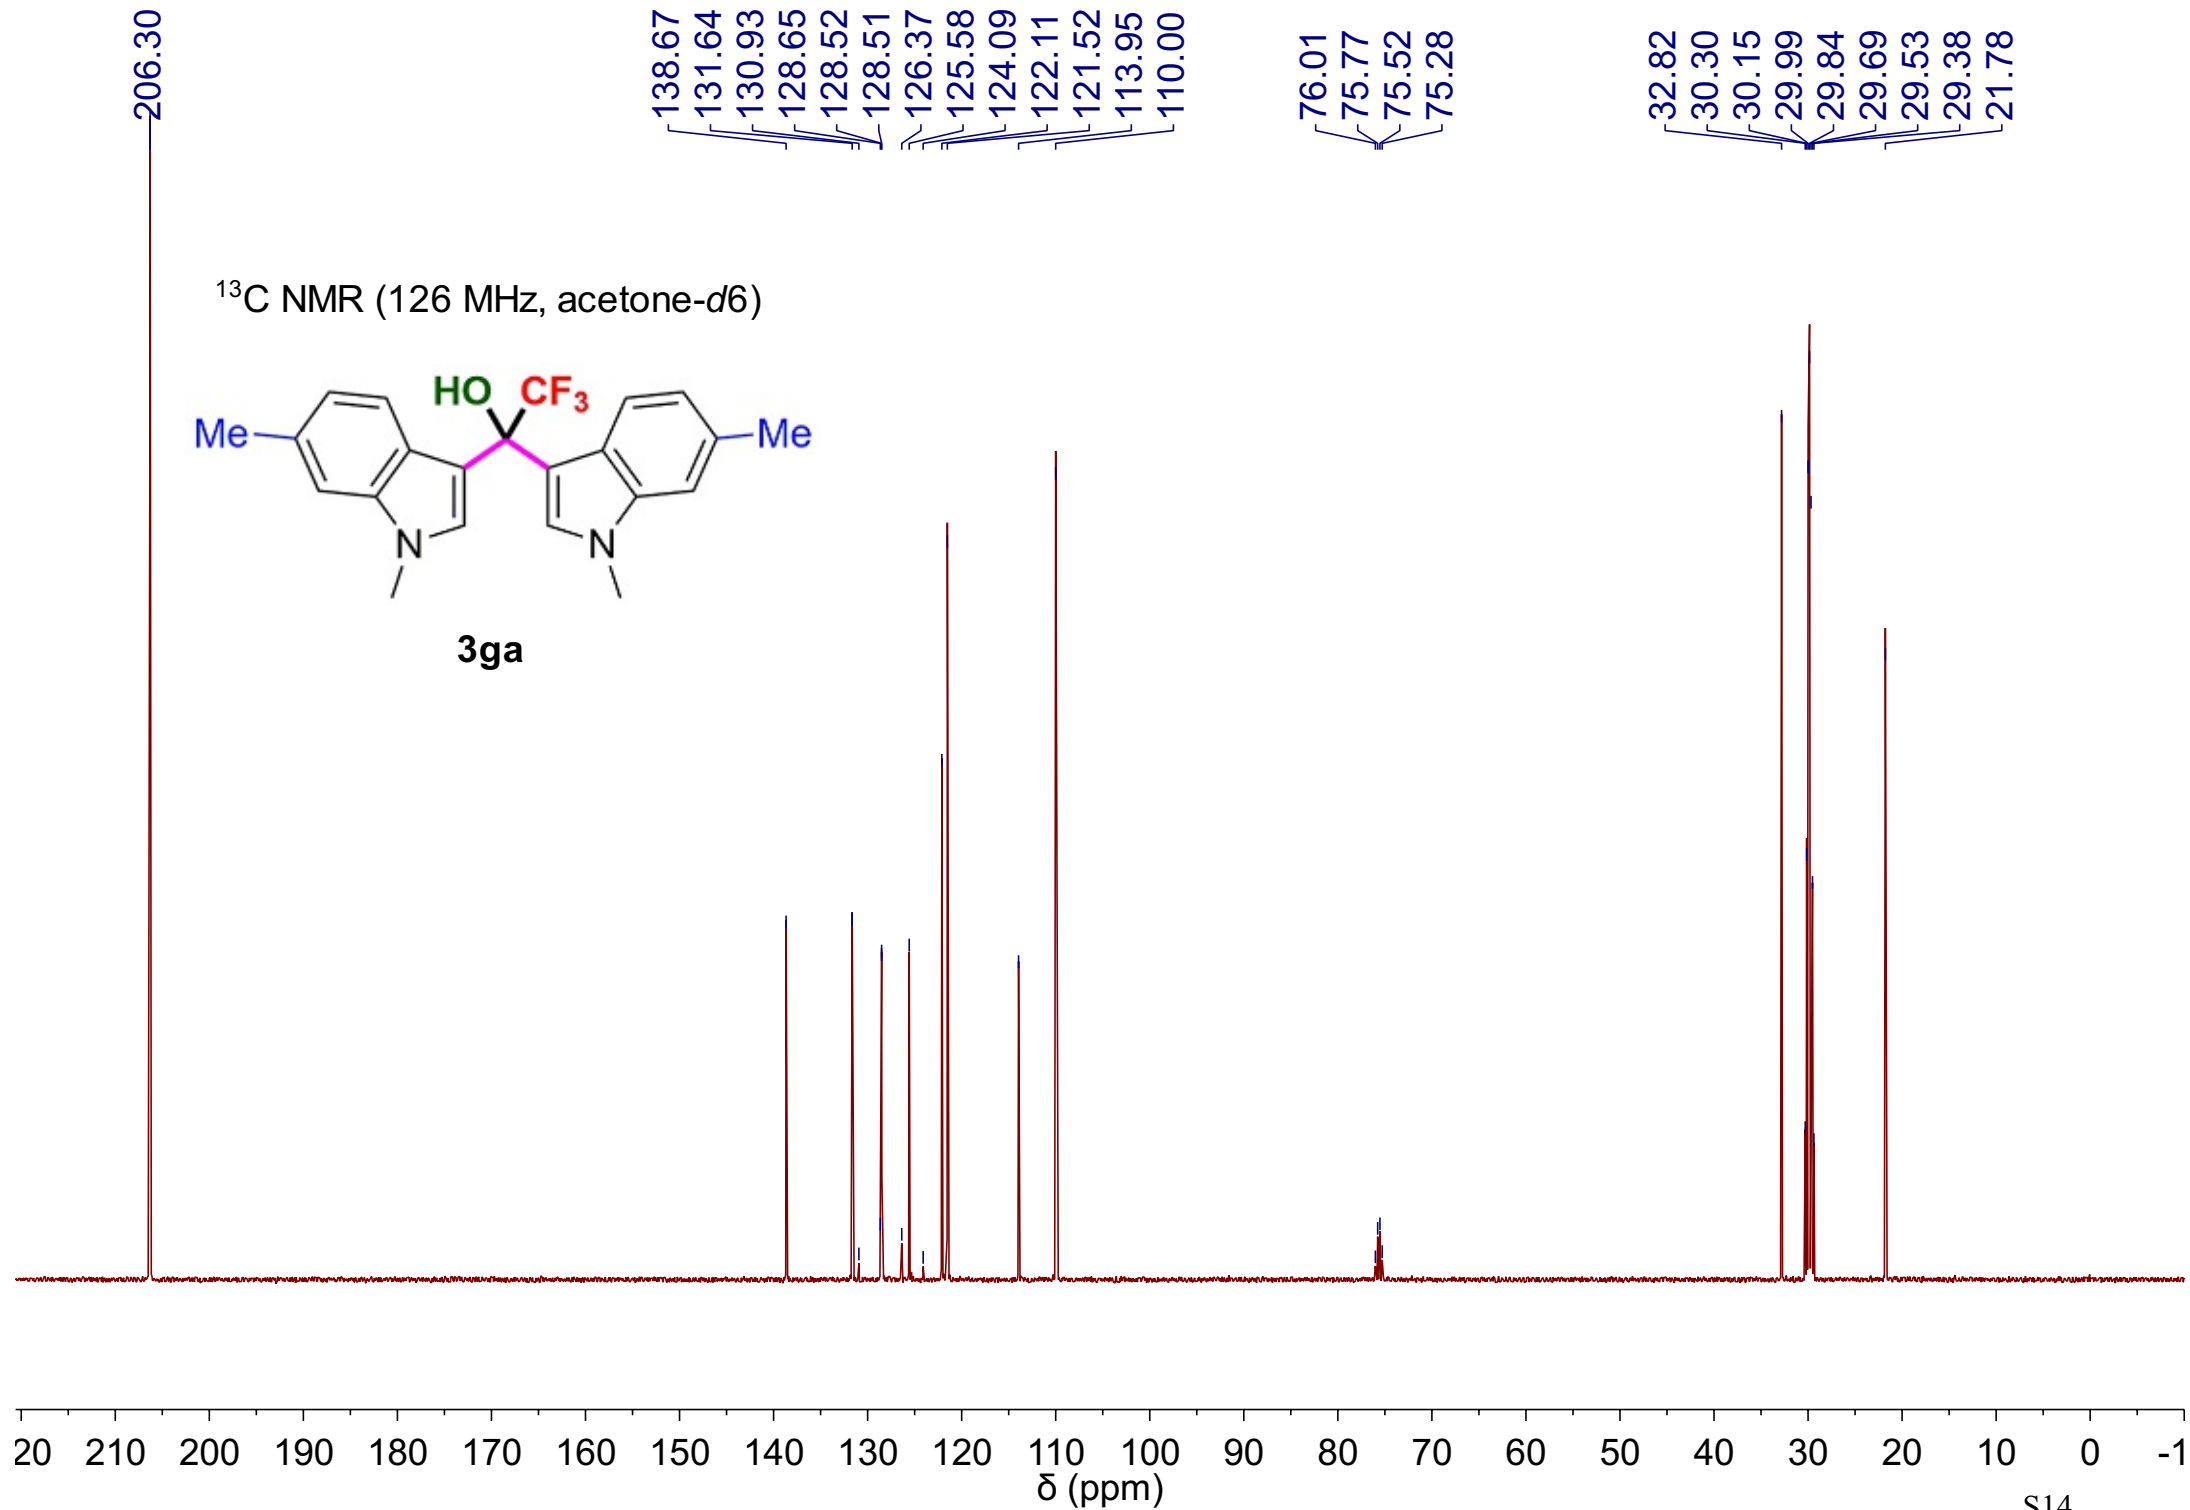

$^{19}\text{F}$  NMR (471 MHz, acetone- $d_6$ )

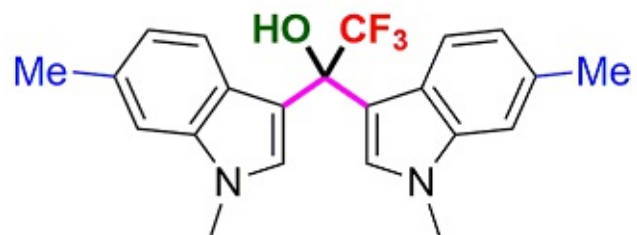

**3ga**

--77.32

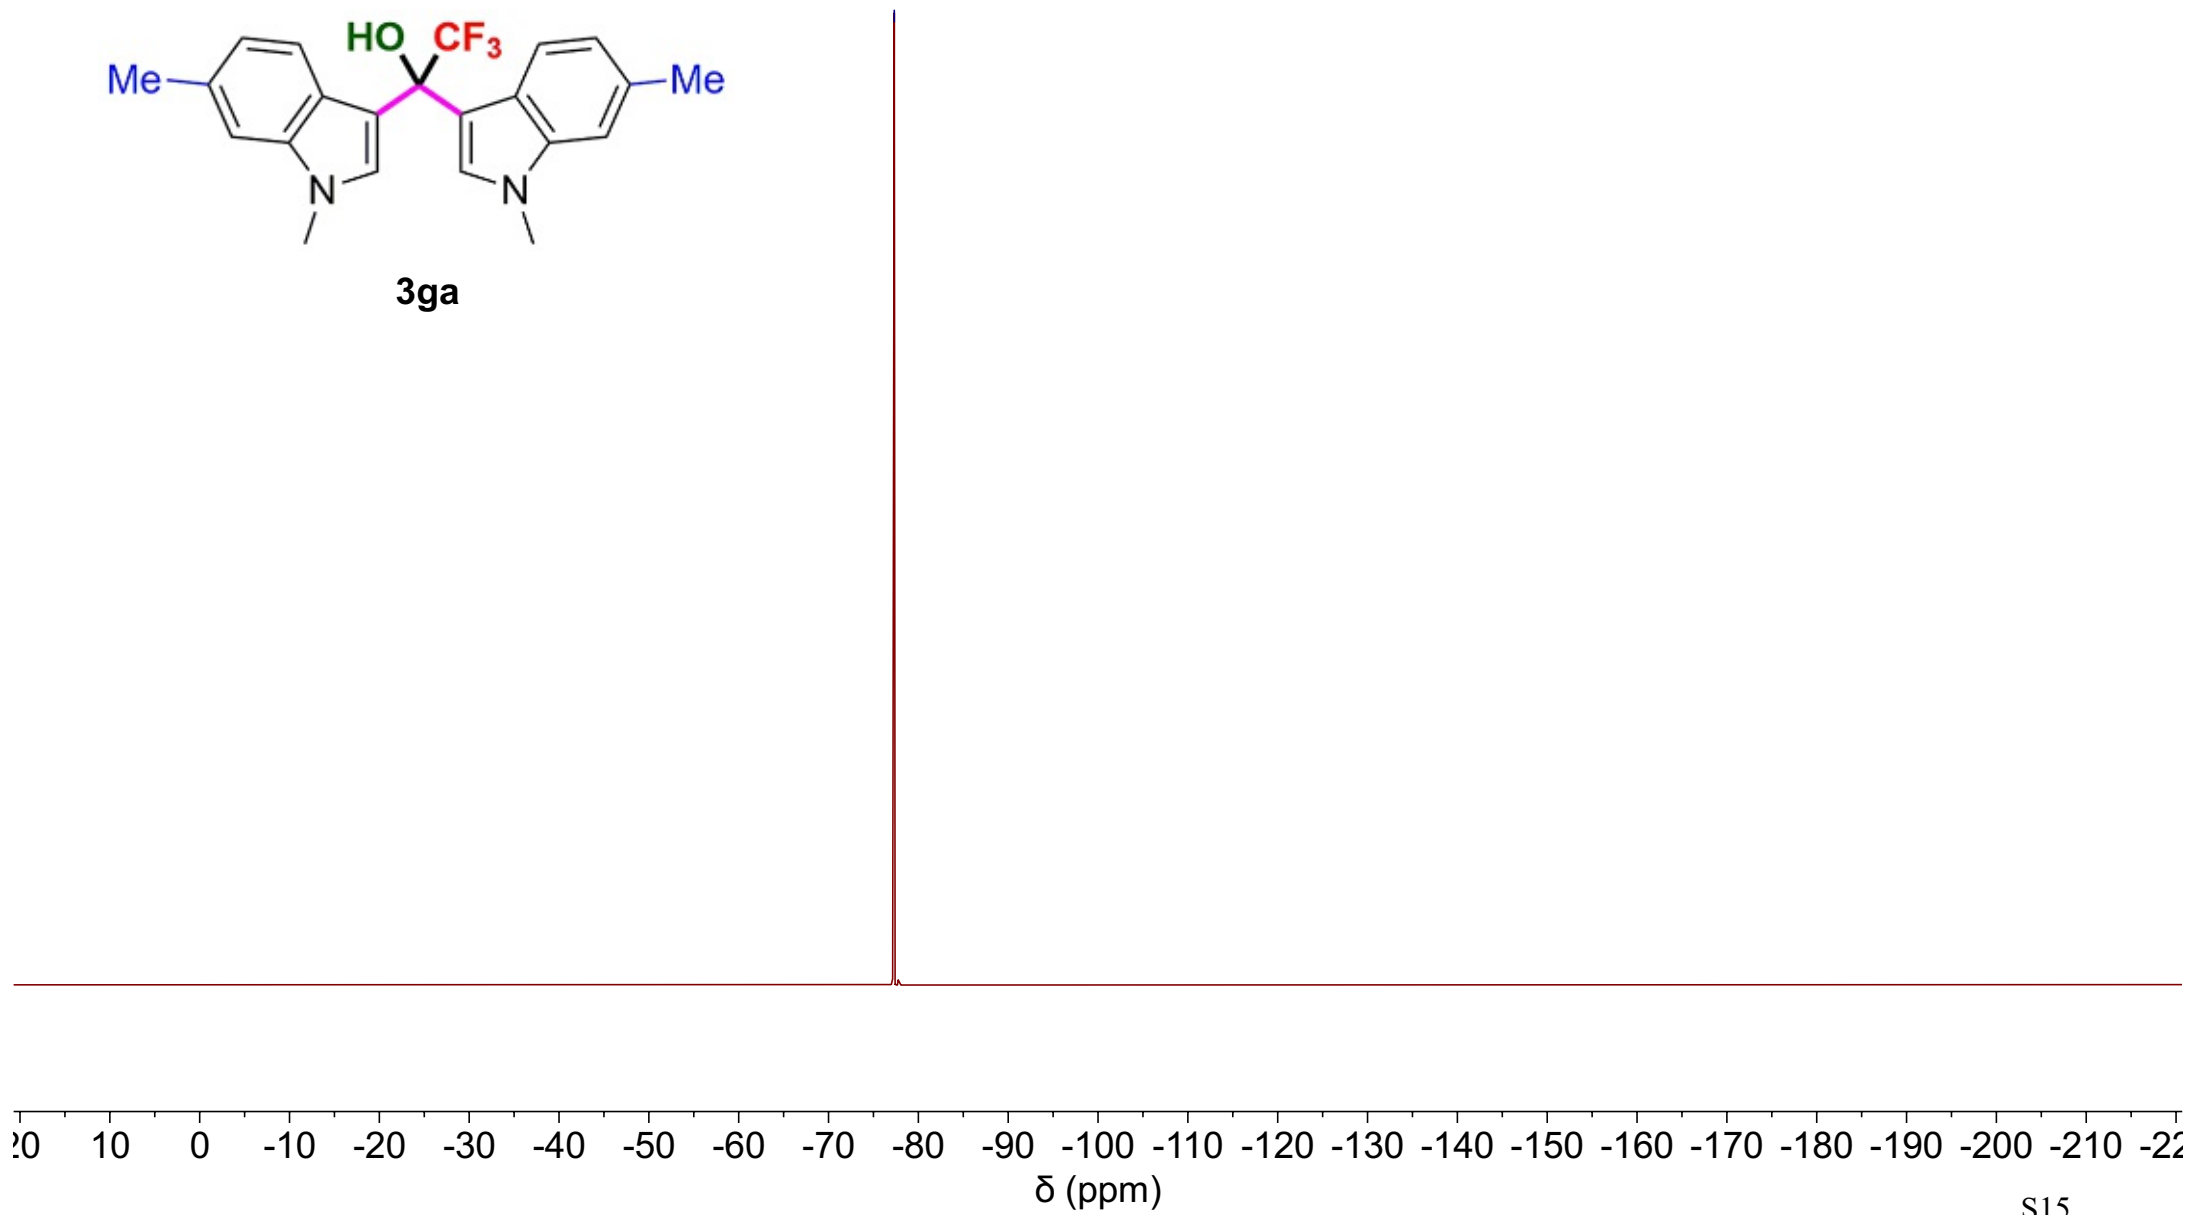



<sup>1</sup>H NMR (400 MHz, acetone-d<sub>6</sub>)

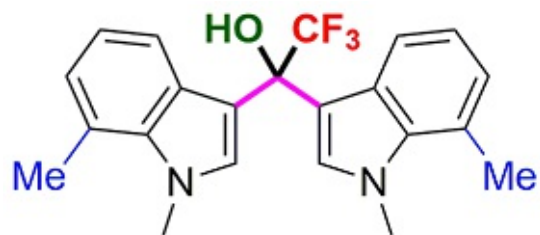

**3ha**

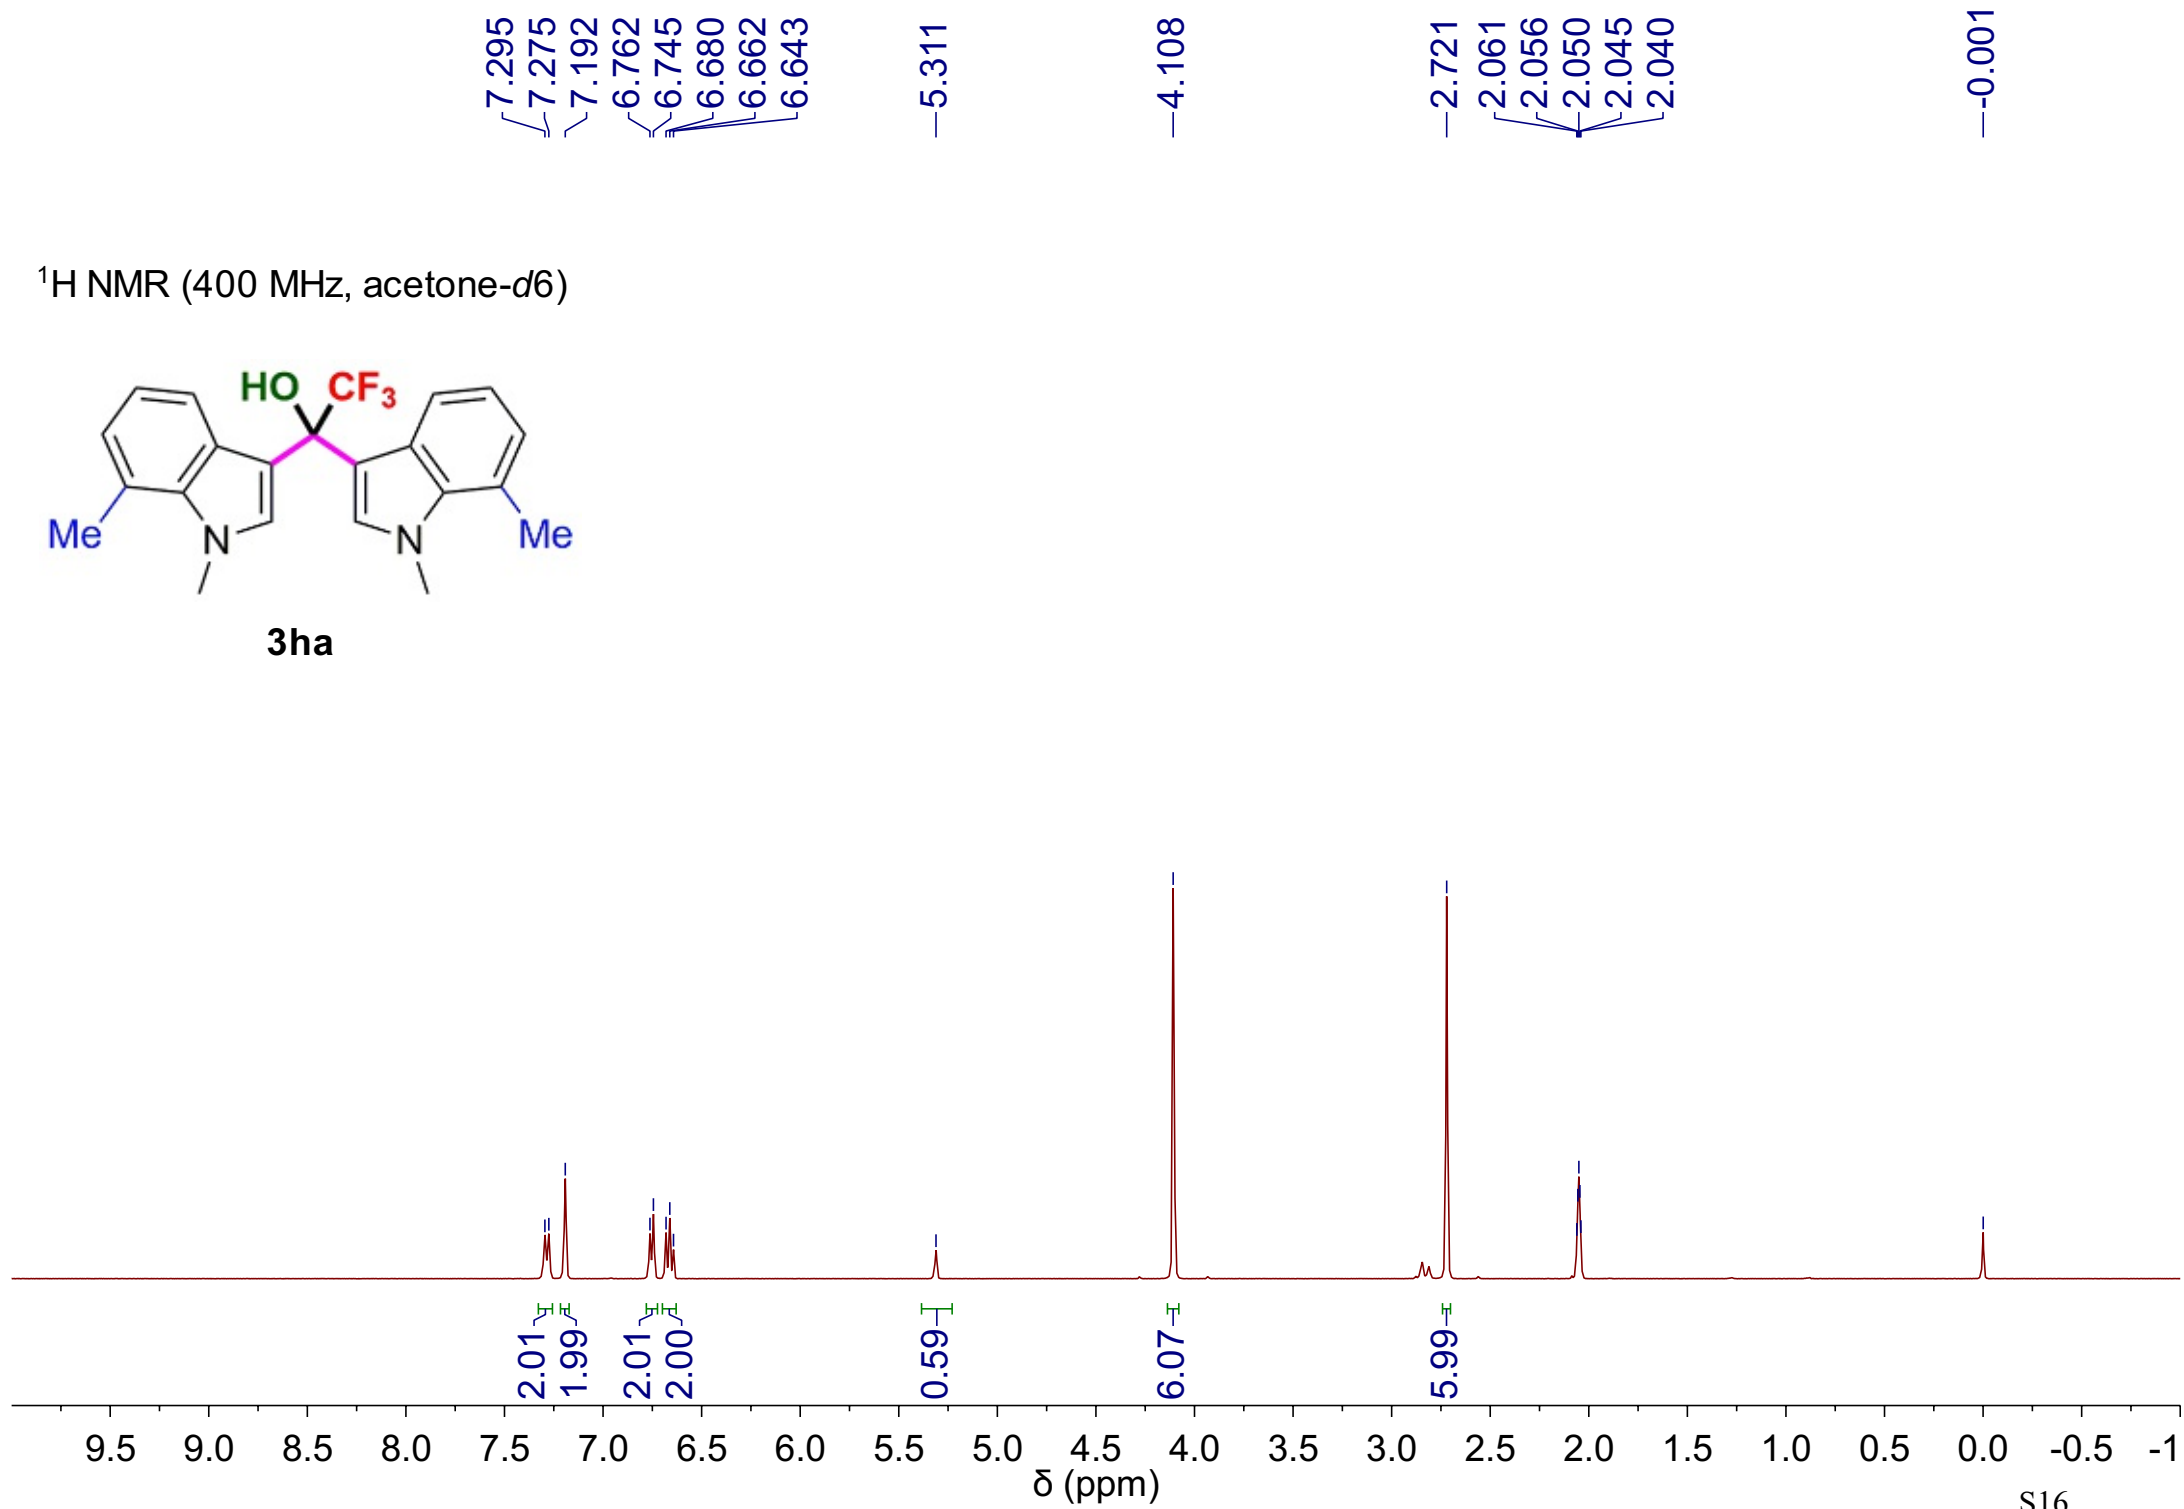

-206.30

136.92  
130.89  
130.71  
130.70  
128.76  
128.61  
126.33  
124.75  
124.05  
121.88  
120.61  
119.88  
113.41

75.99  
75.74  
75.50  
75.26

37.05  
30.30  
30.15  
29.99  
29.84  
29.69  
29.53  
29.38  
-19.75

<sup>13</sup>C NMR (126 MHz, acetone-*d*<sub>6</sub>)

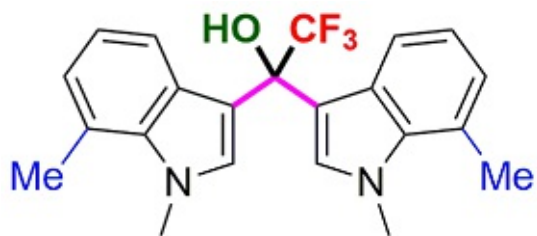

**3ha**

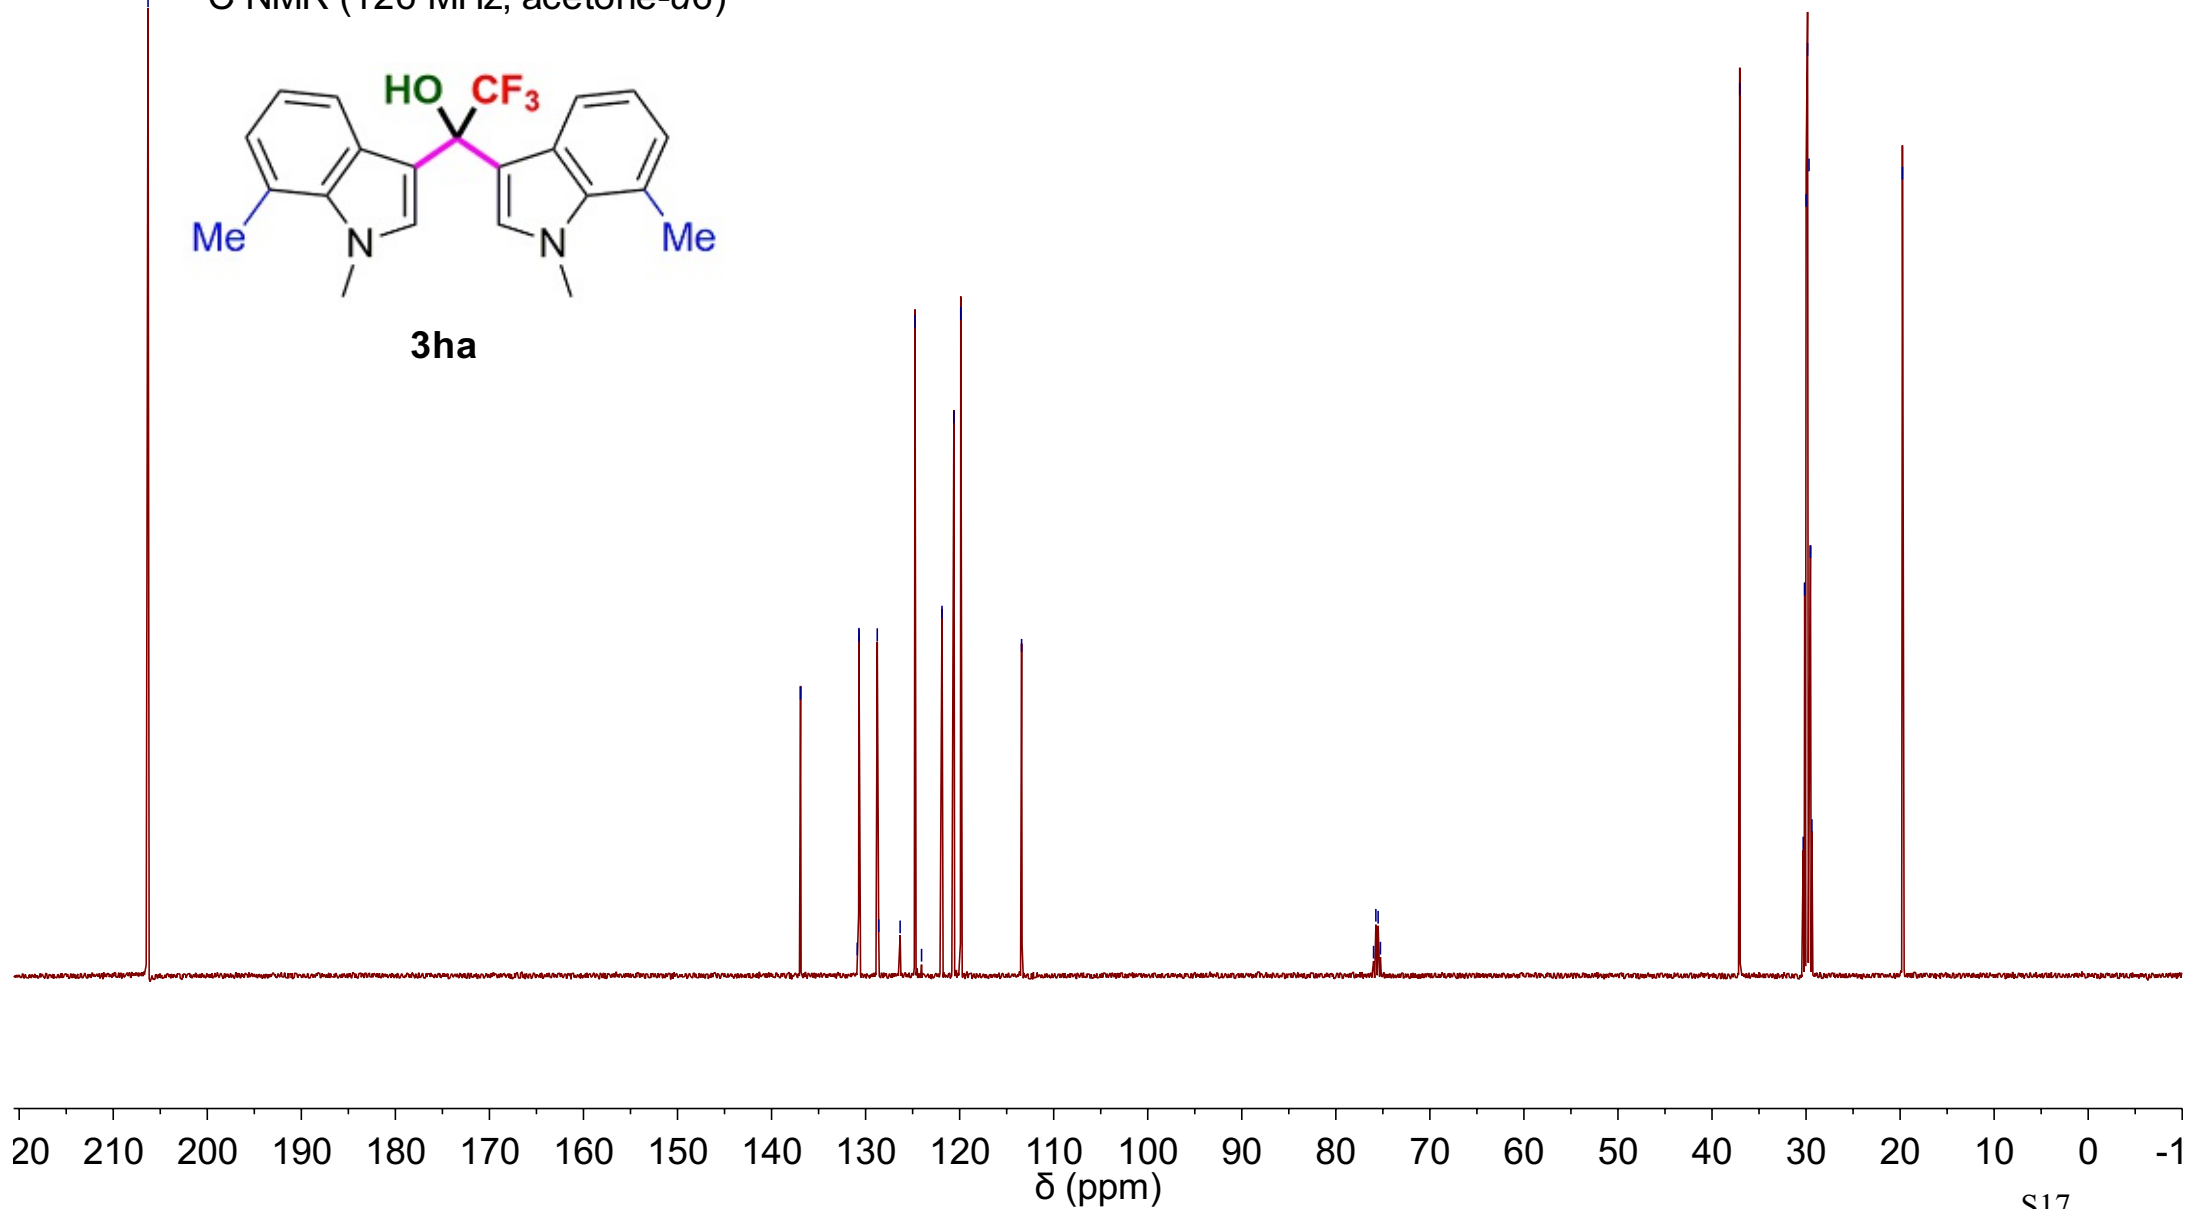

$^{19}\text{F}$  NMR (471 MHz, acetone- $d_6$ )

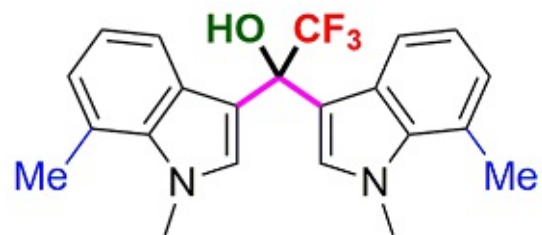

3ha

--77.27

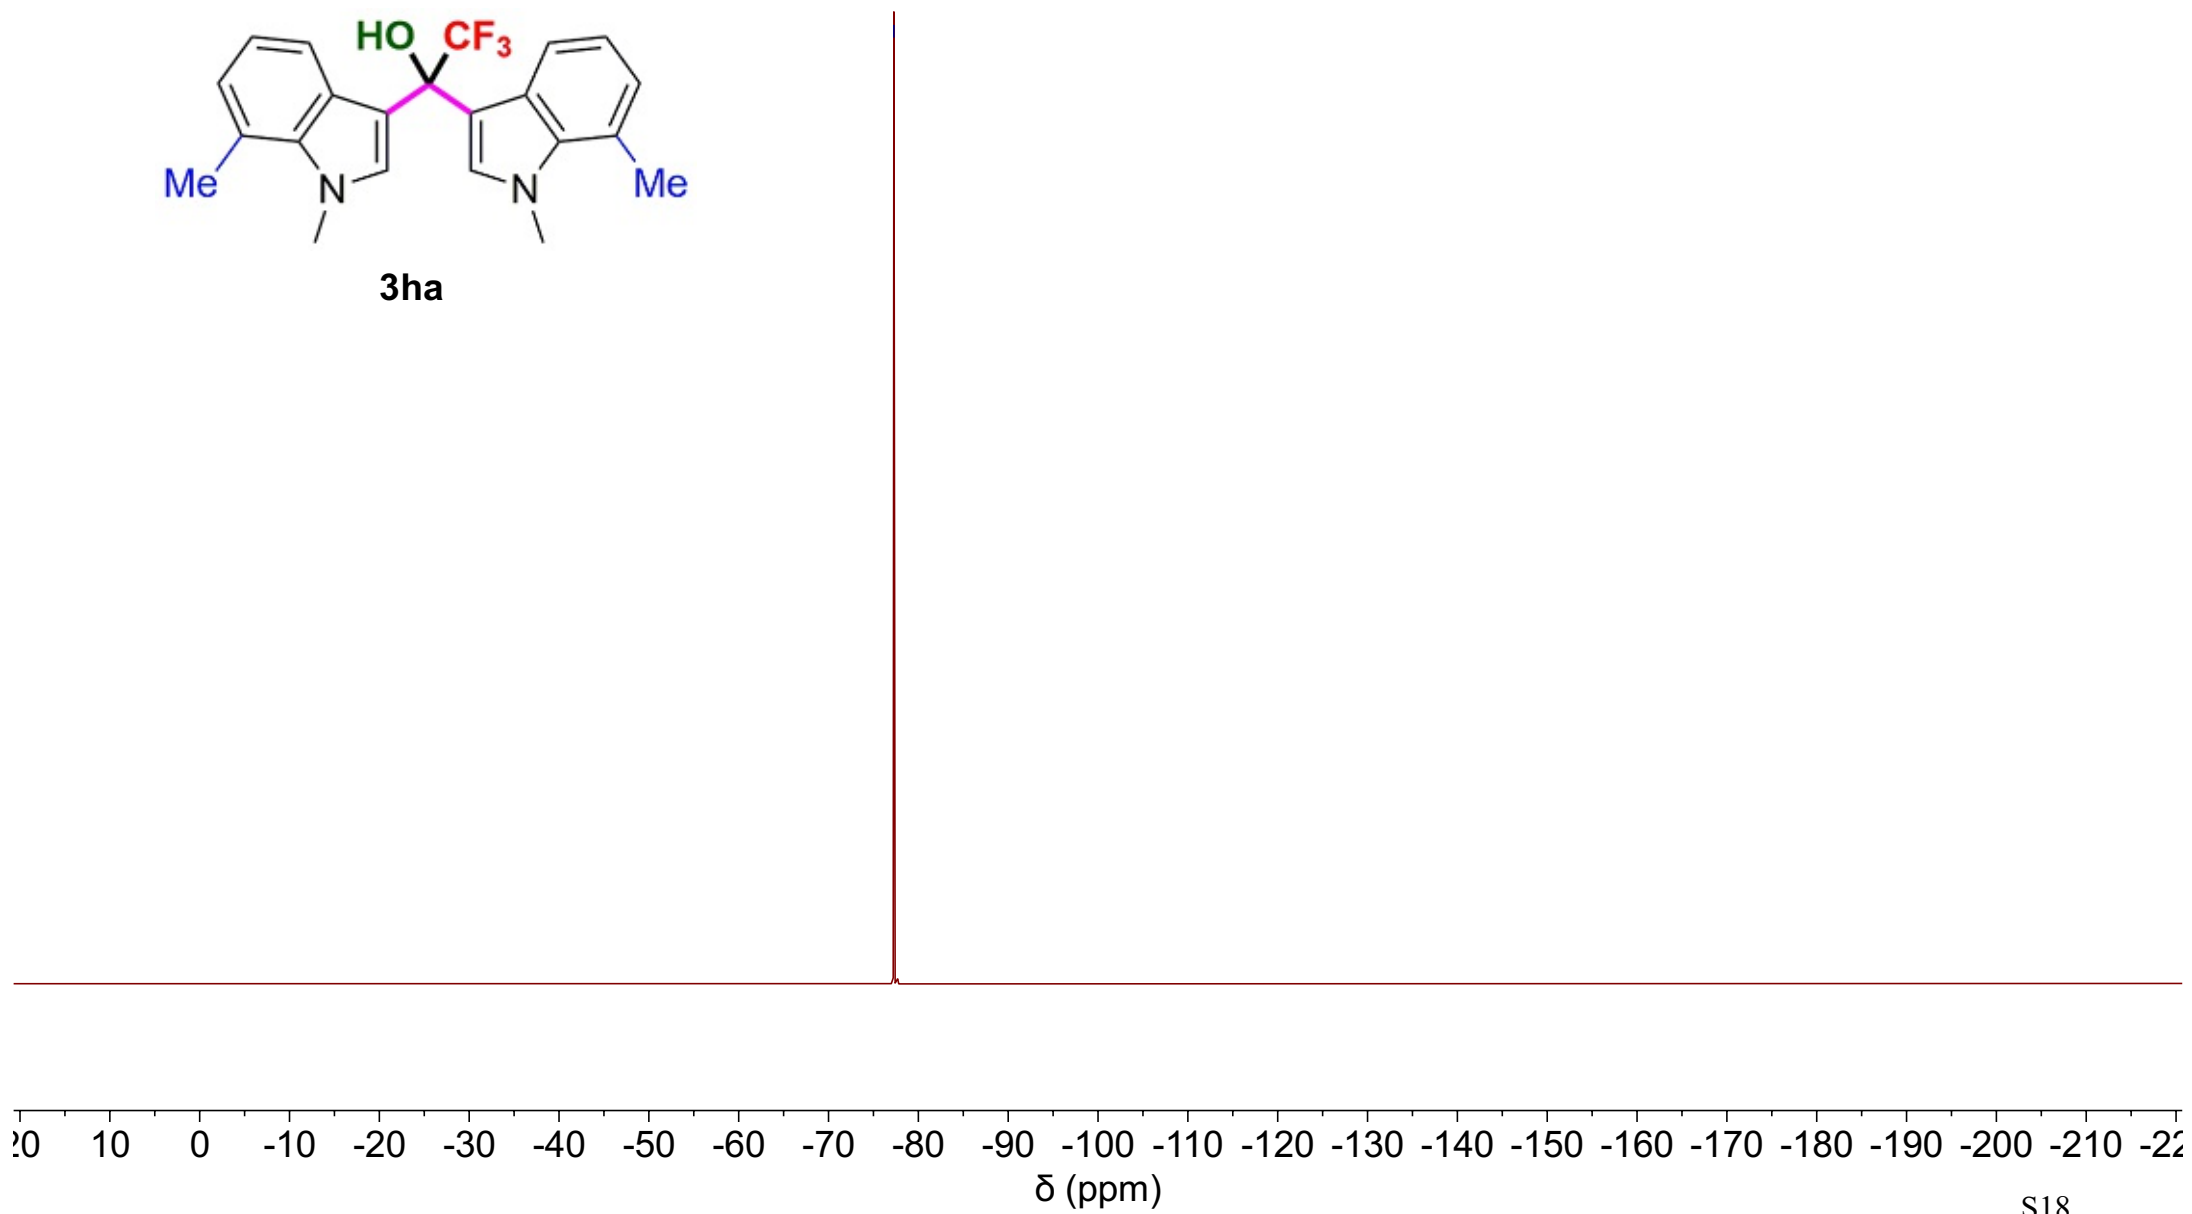

$^1\text{H}$  NMR (500 MHz, acetone- $d_6$ )

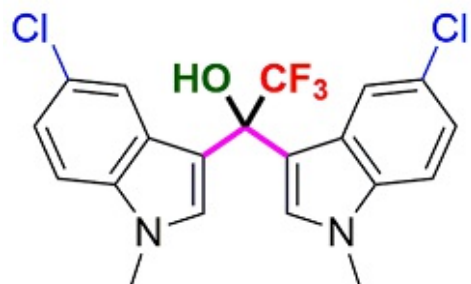

**3ia**

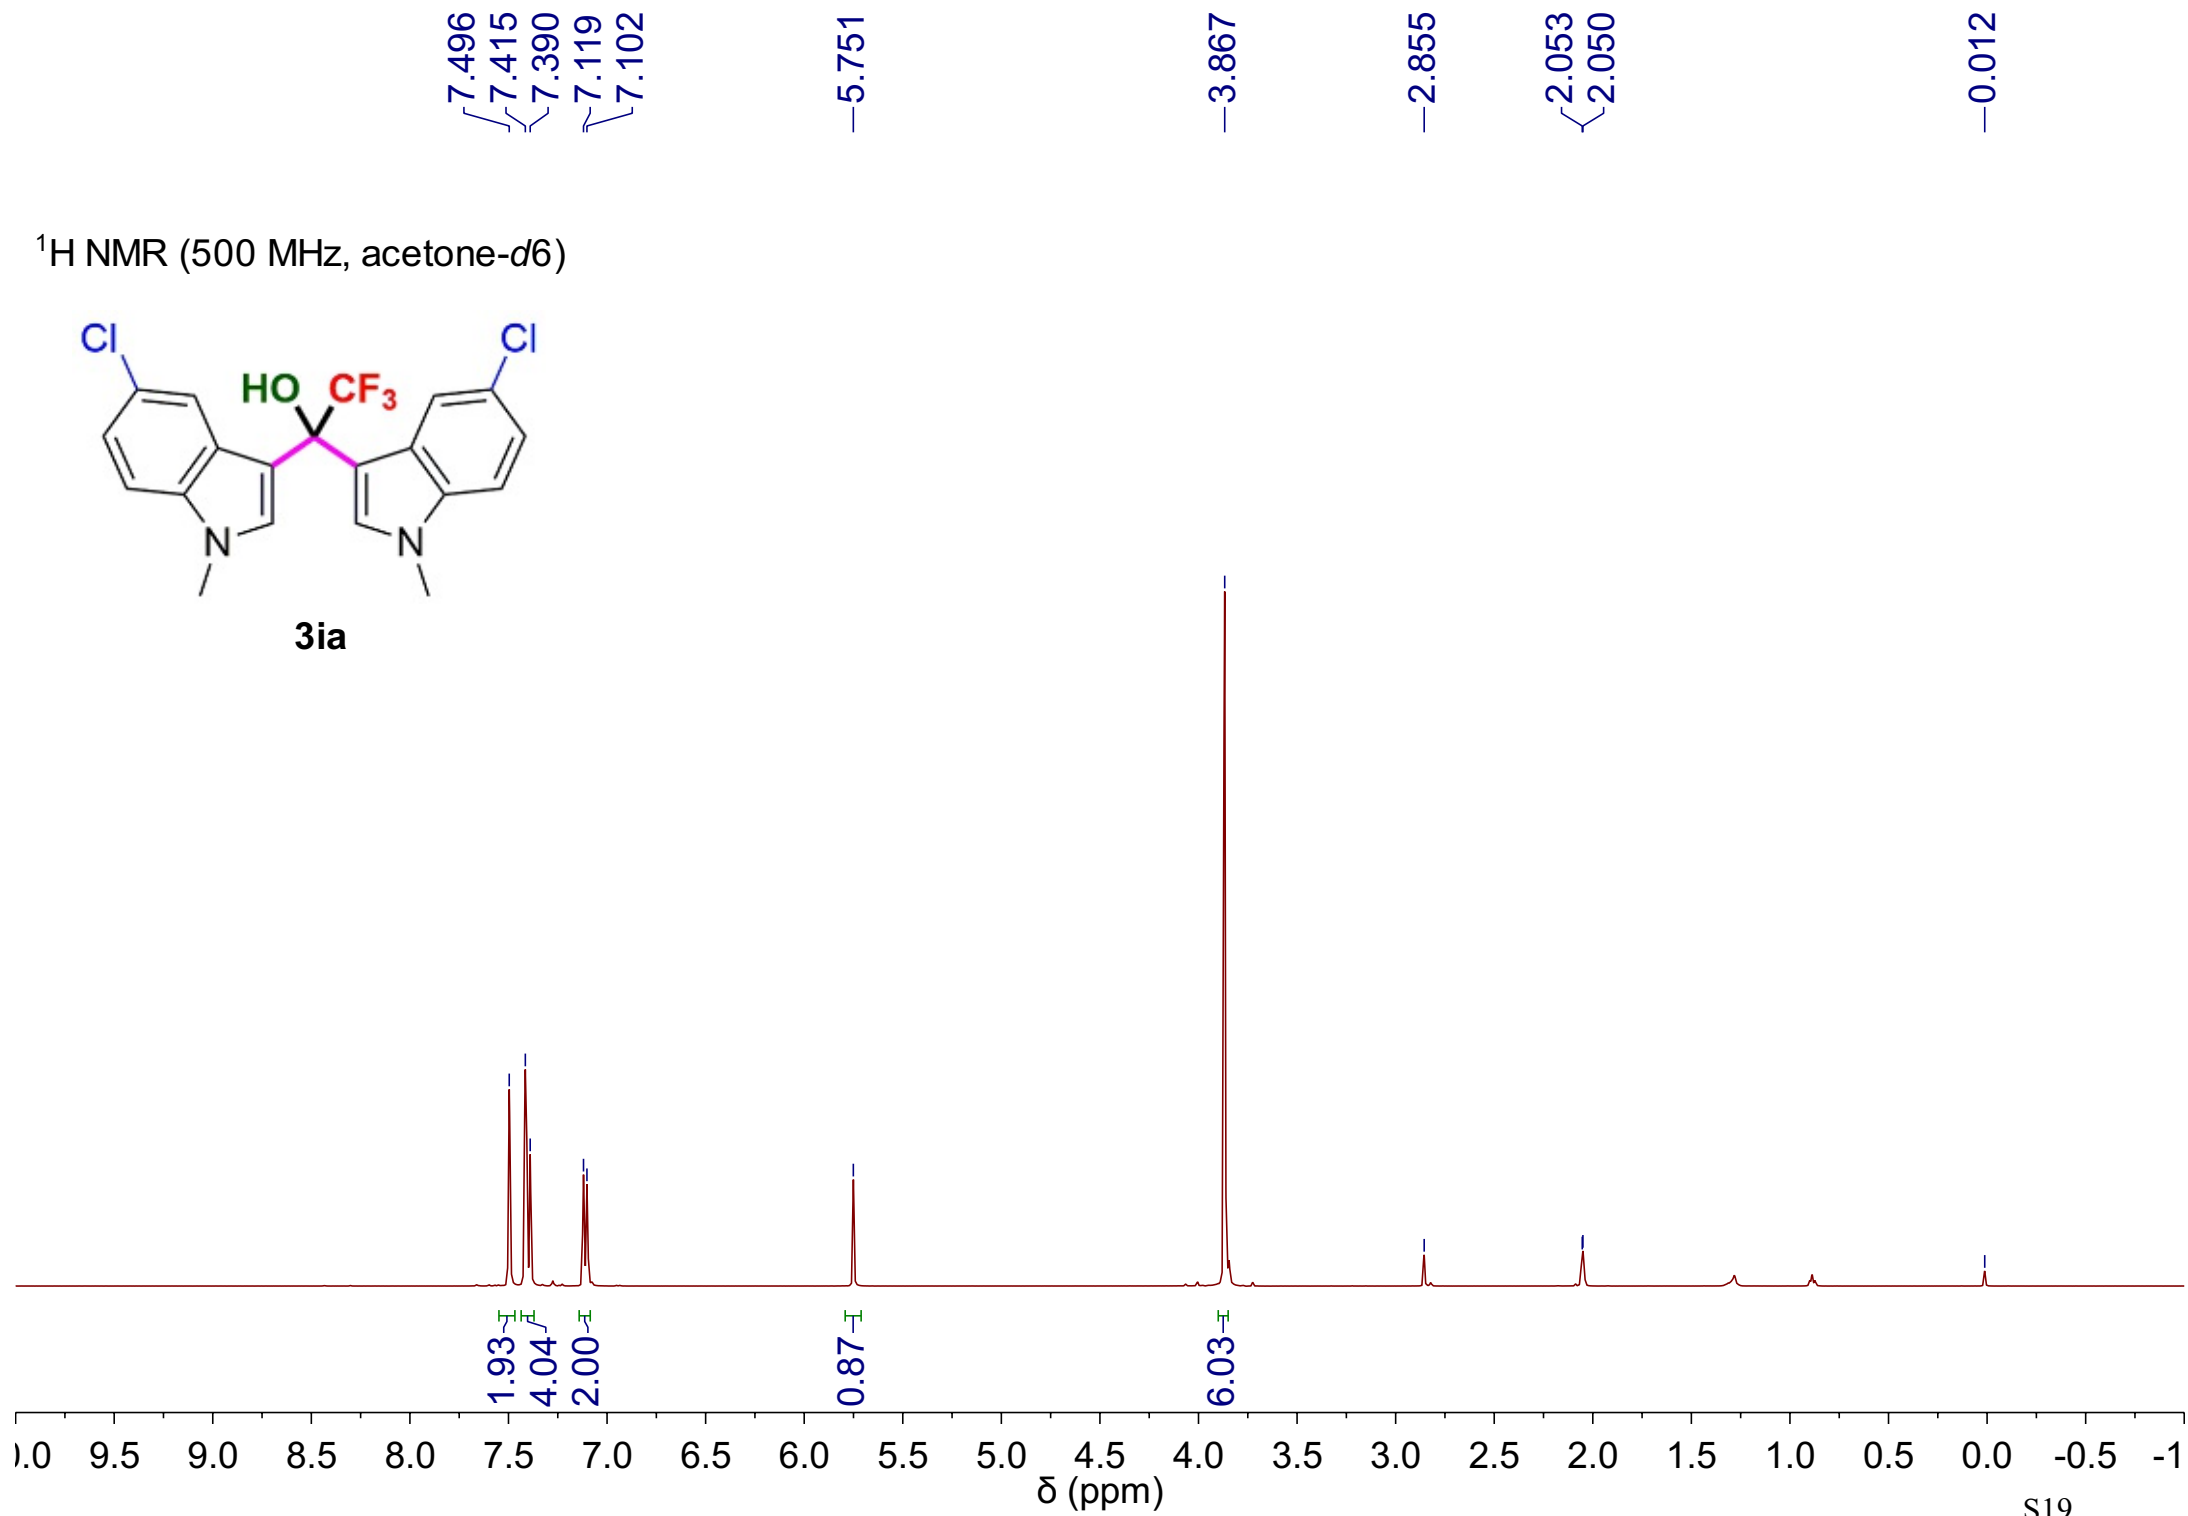

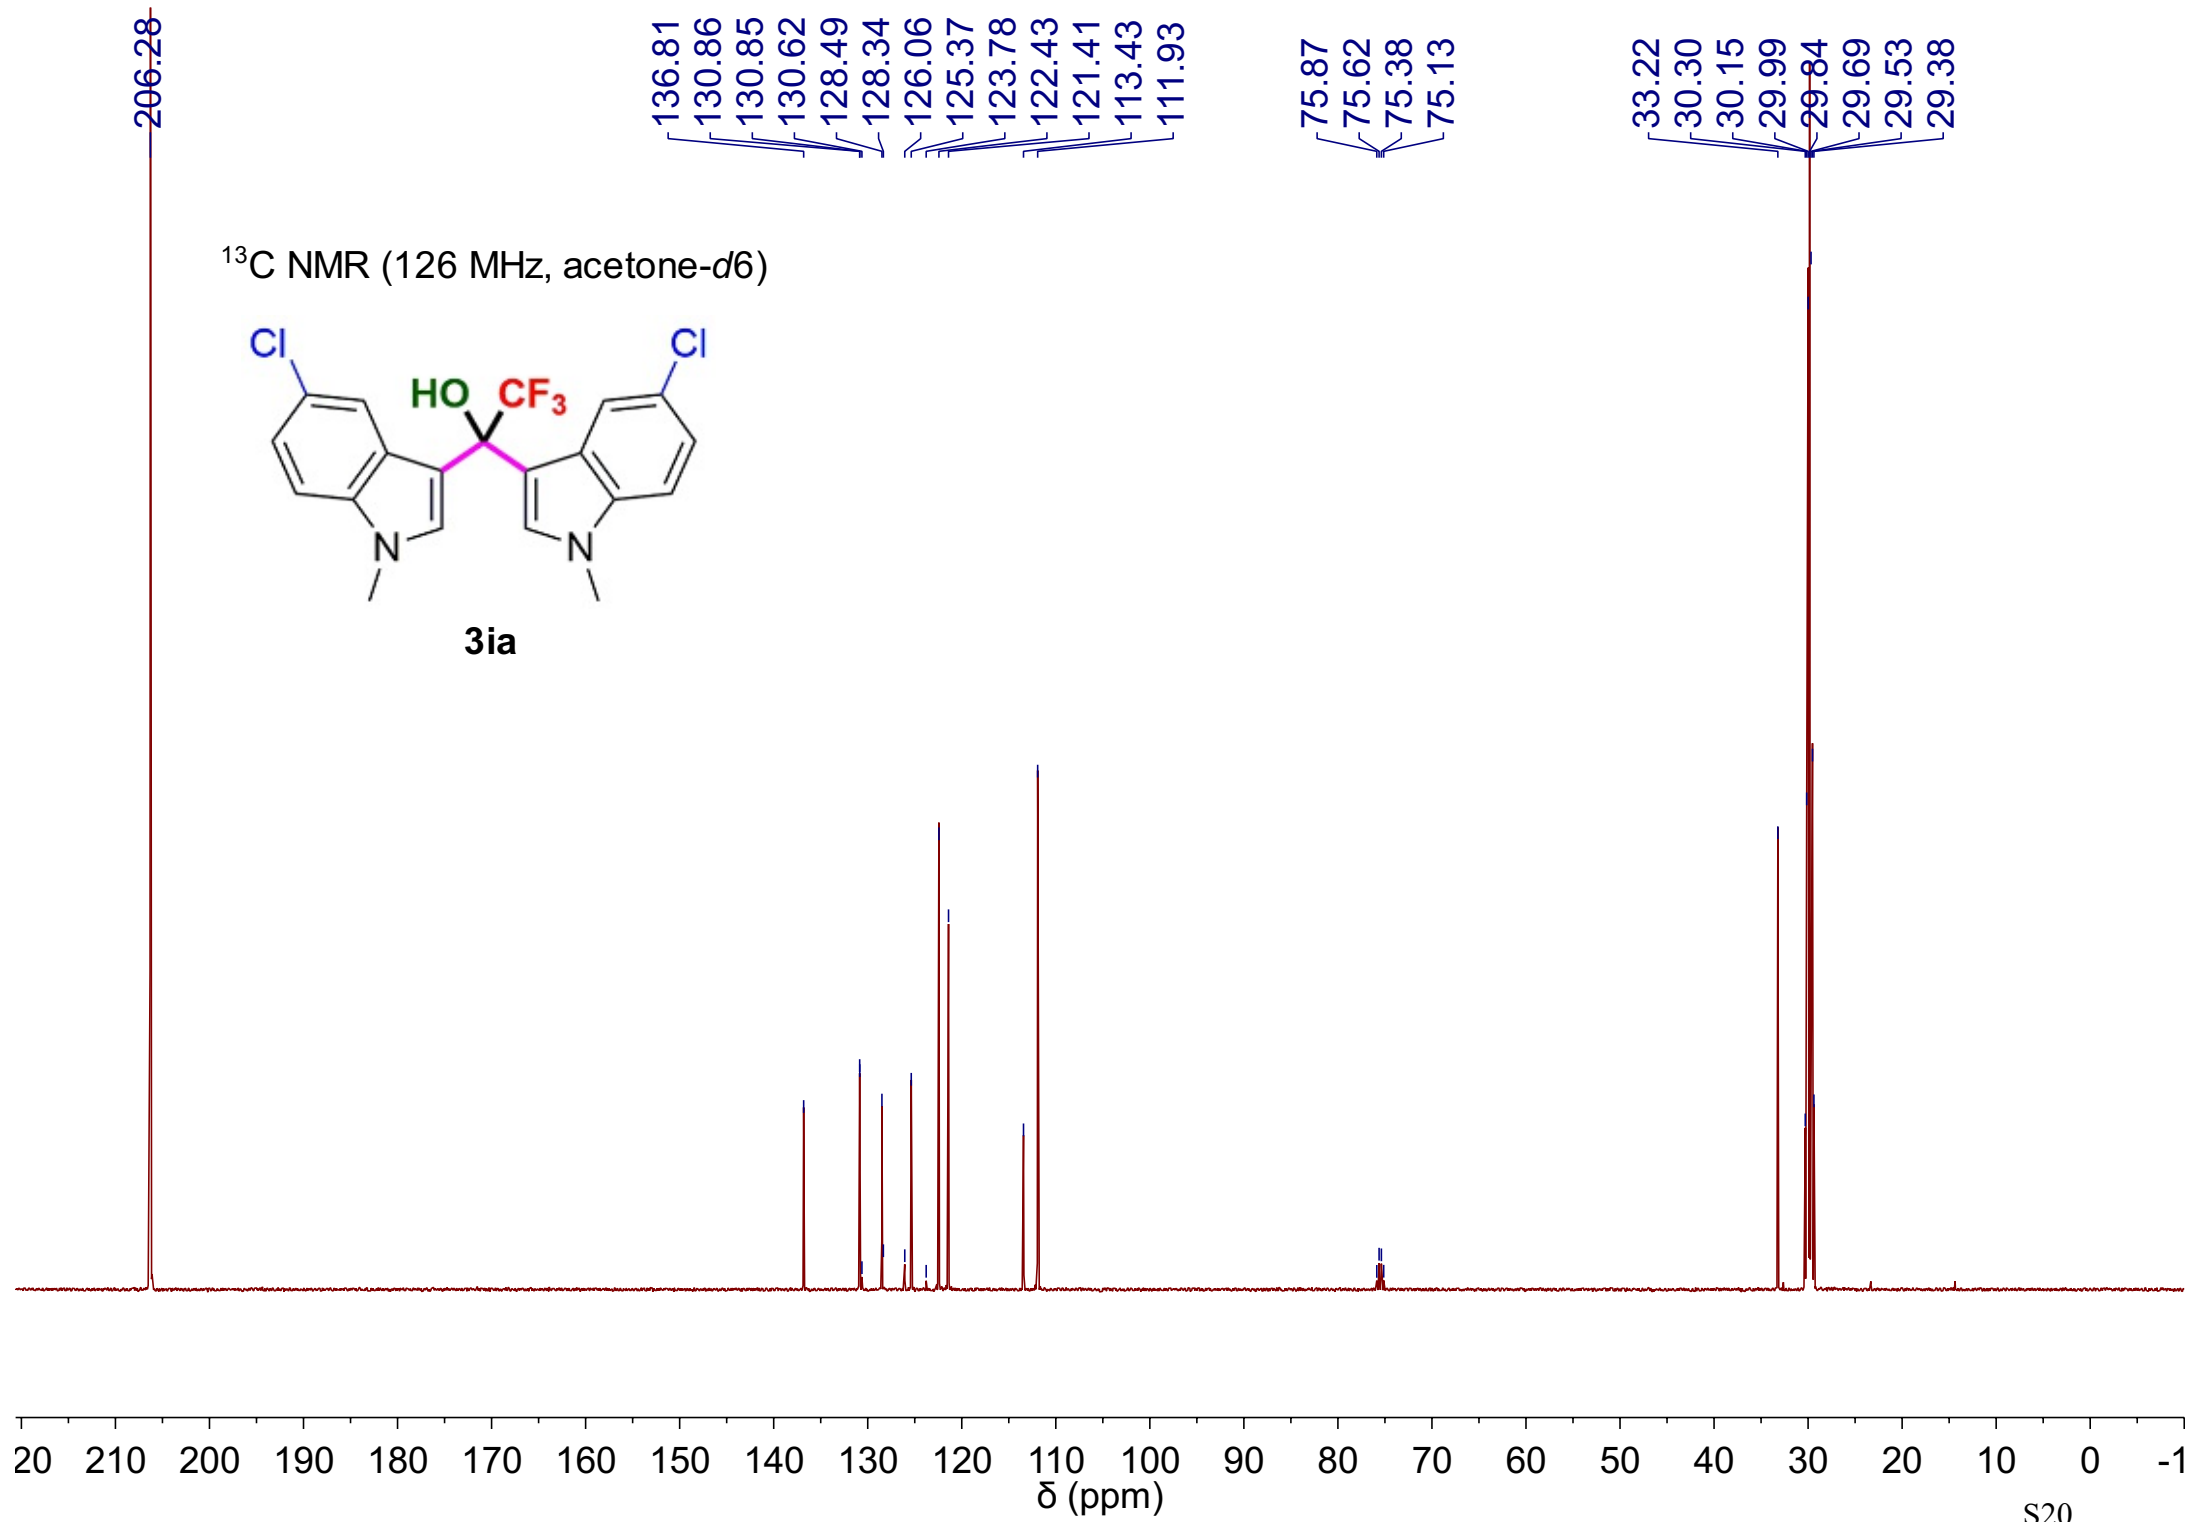

$^{19}\text{F}$  NMR (471 MHz, acetone- $d_6$ )

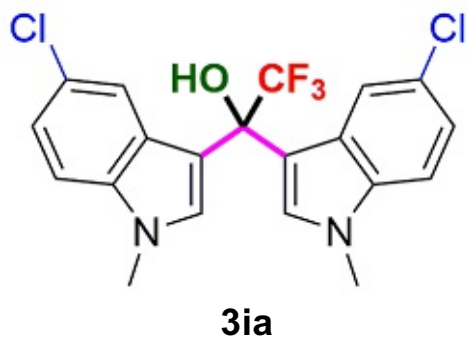

---77.77

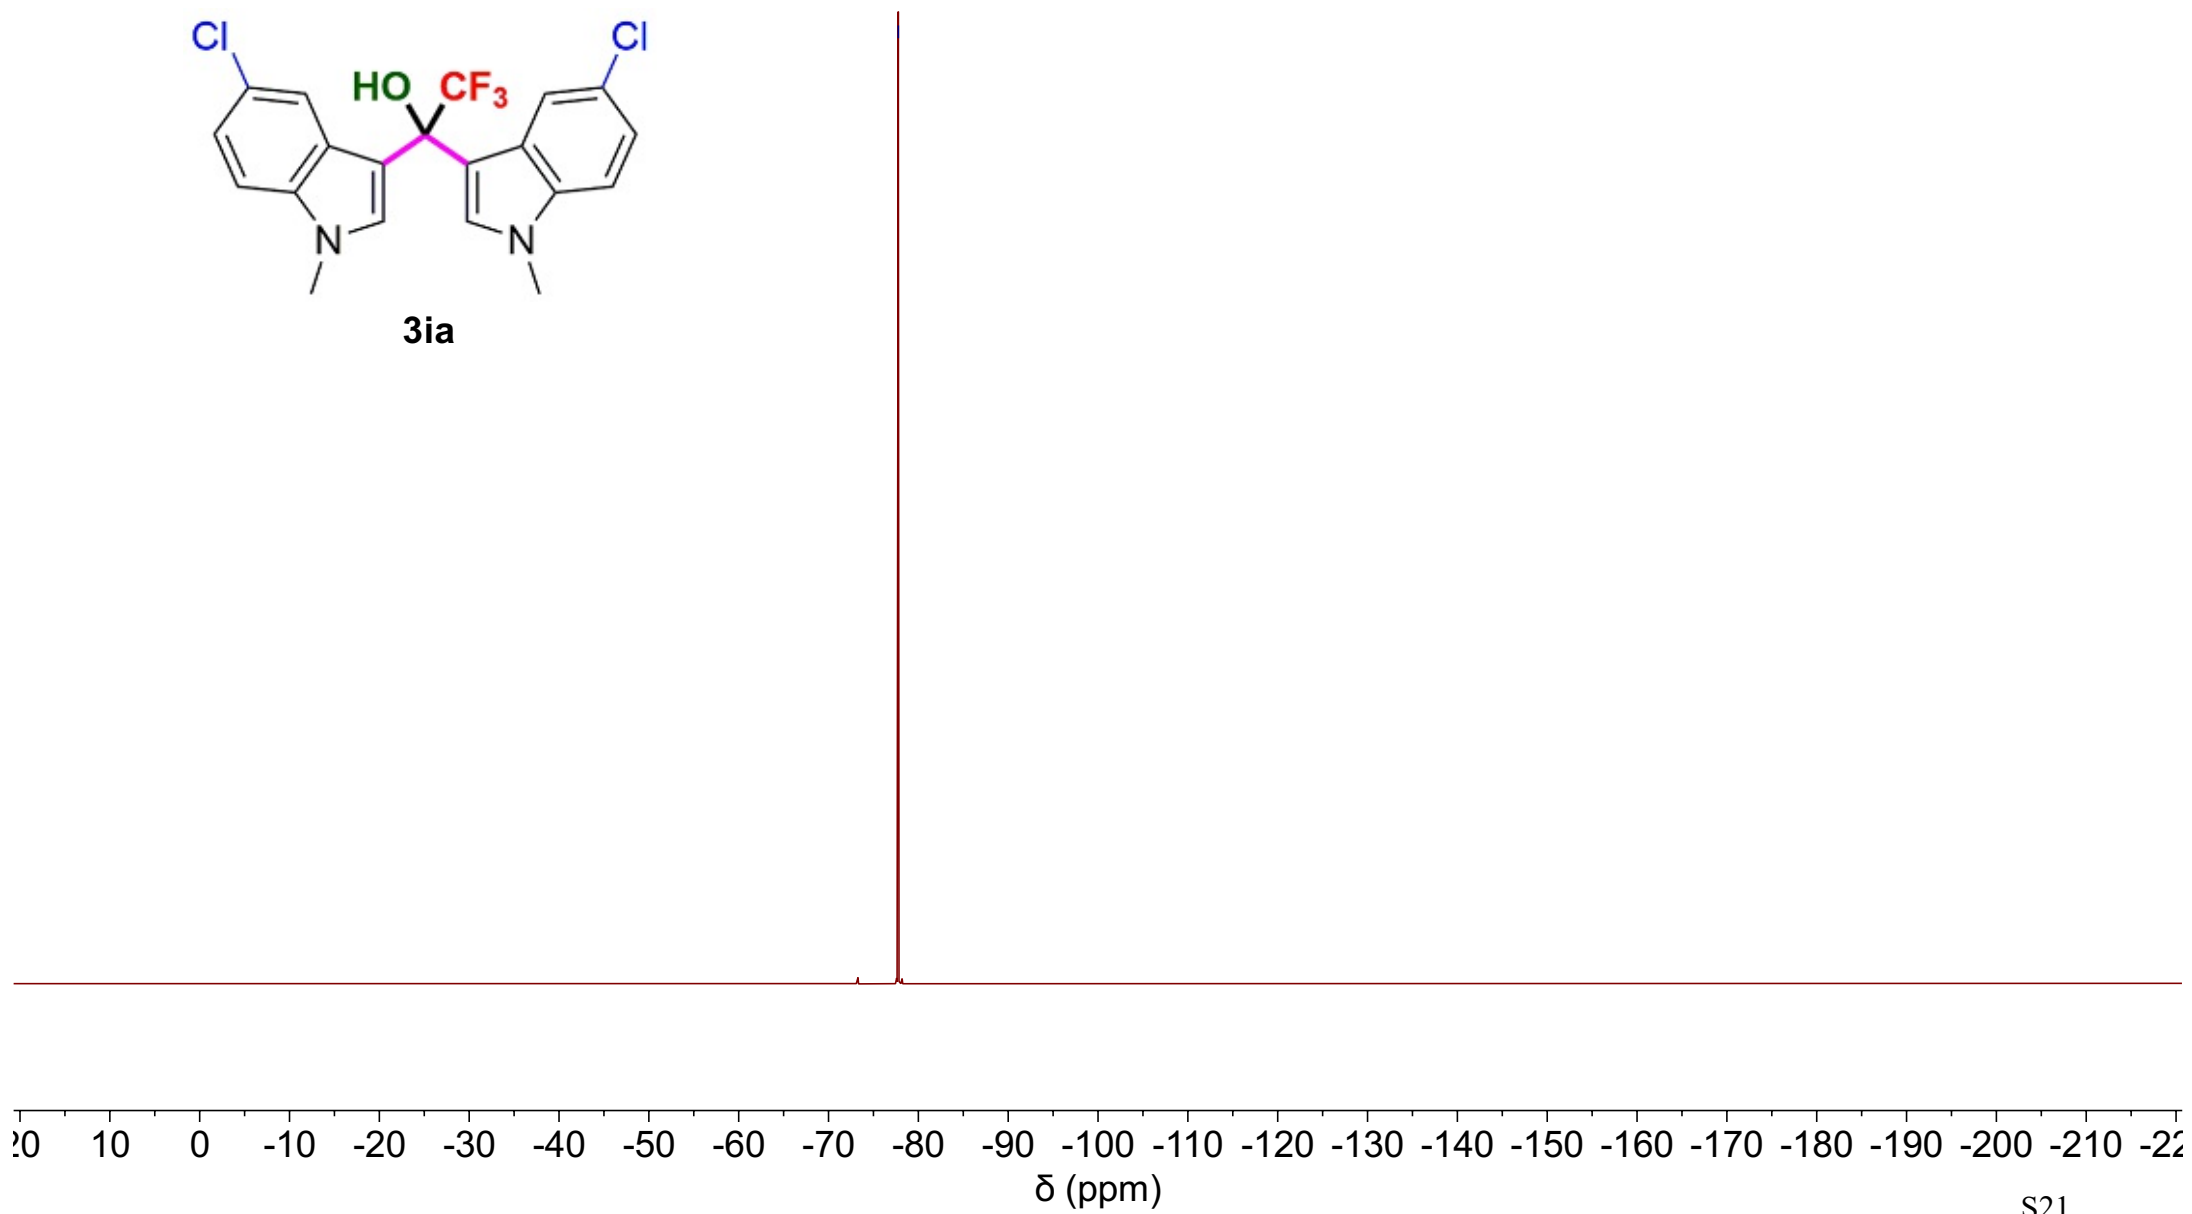

7.667  
7.664  
7.386  
7.365  
7.250  
7.245  
7.228  
7.223

5.783

3.871

2.845  
2.812  
2.061  
2.056  
2.050  
2.045  
2.040

0.003

<sup>1</sup>H NMR (400 MHz, acetone-*d*<sub>6</sub>)

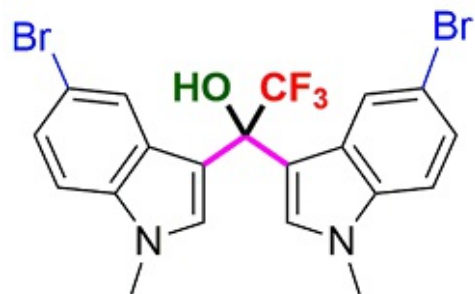

**3ja**

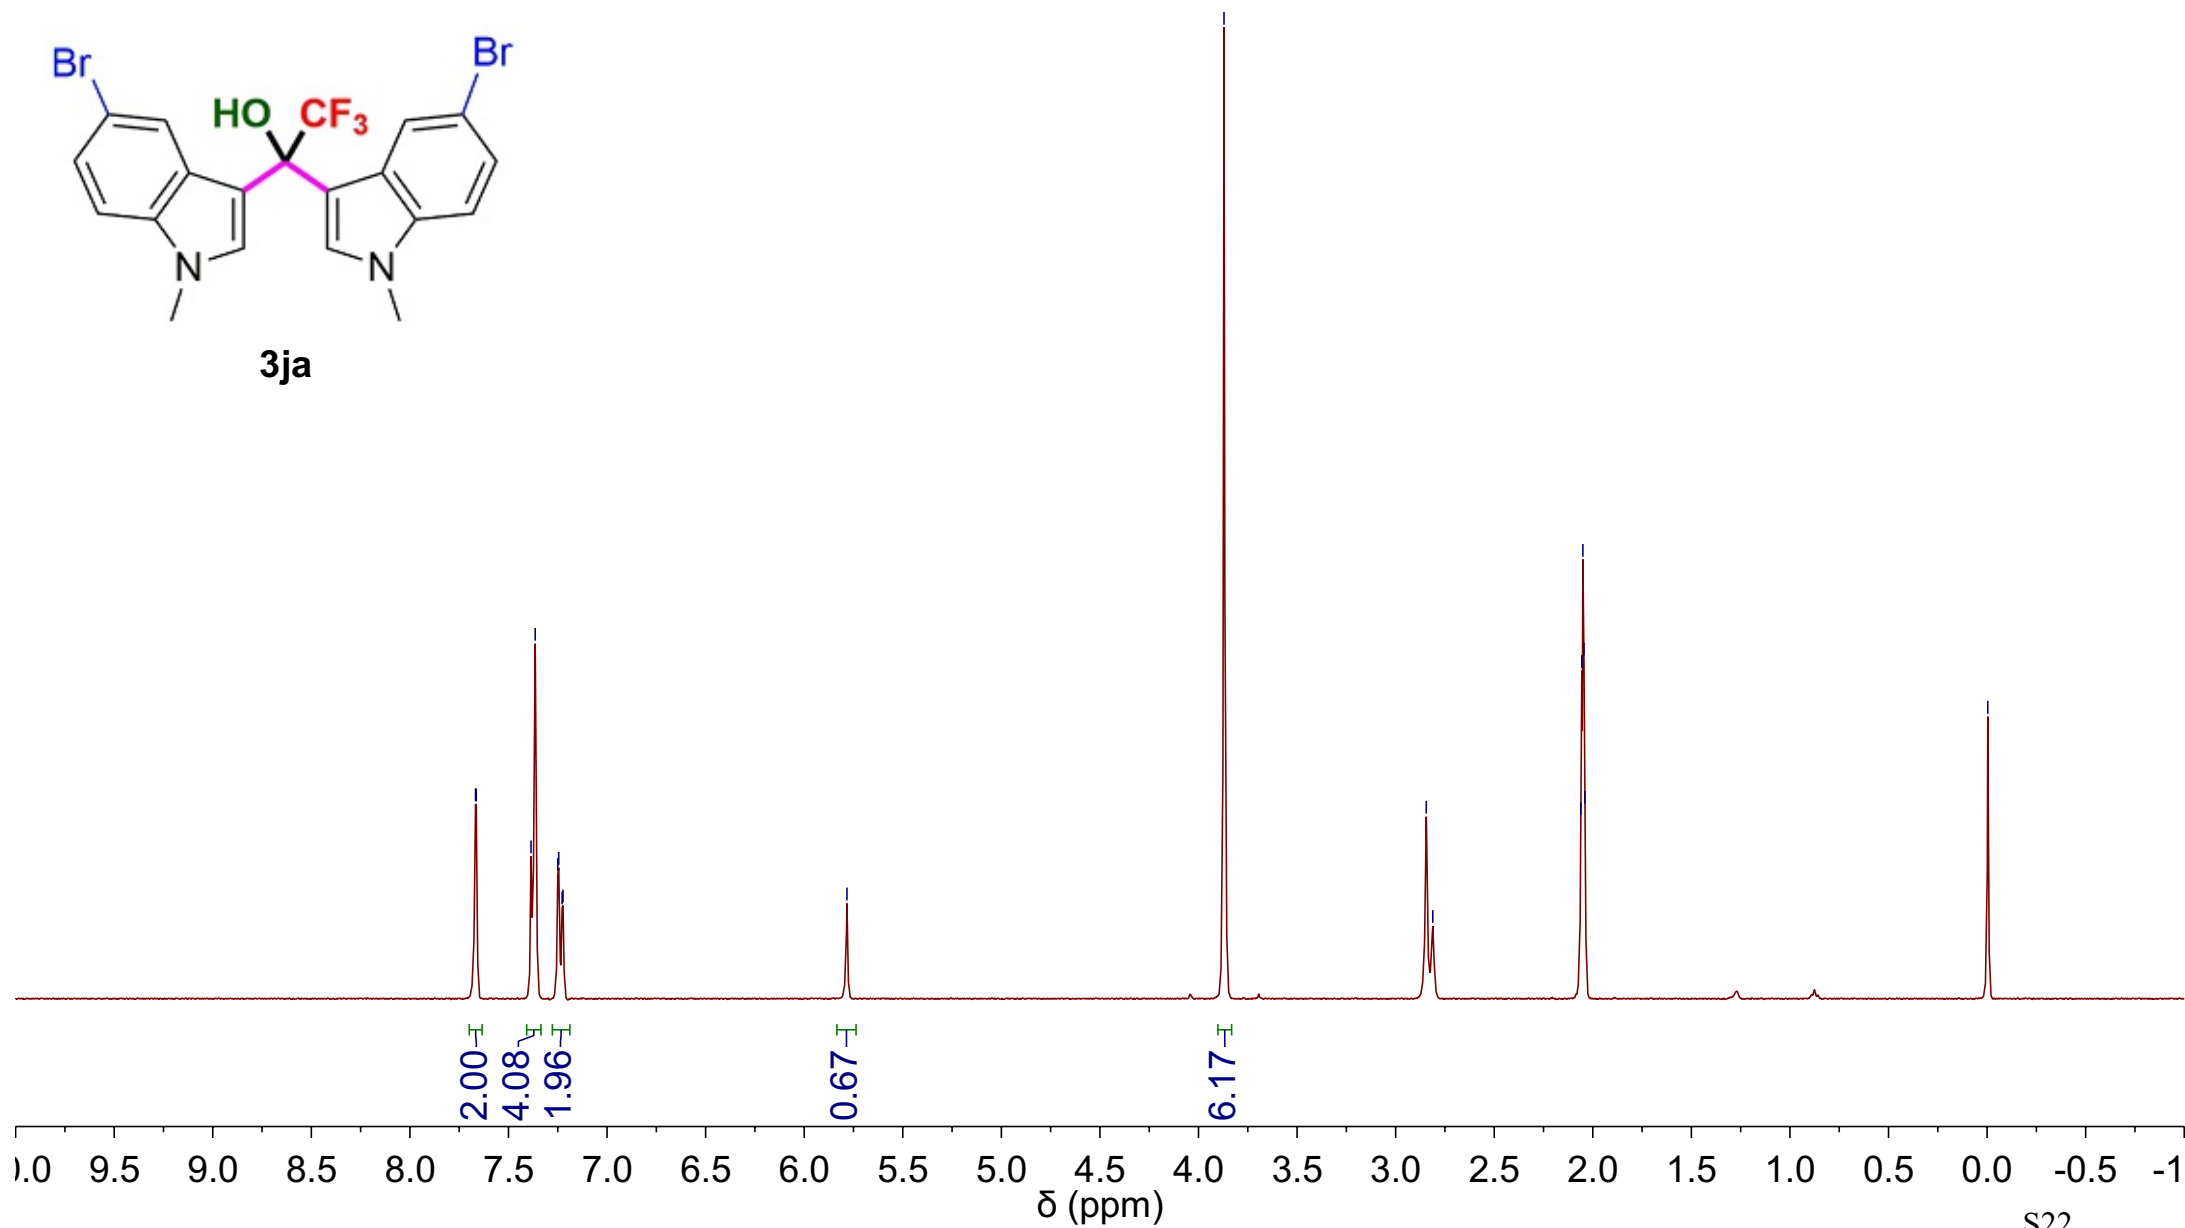

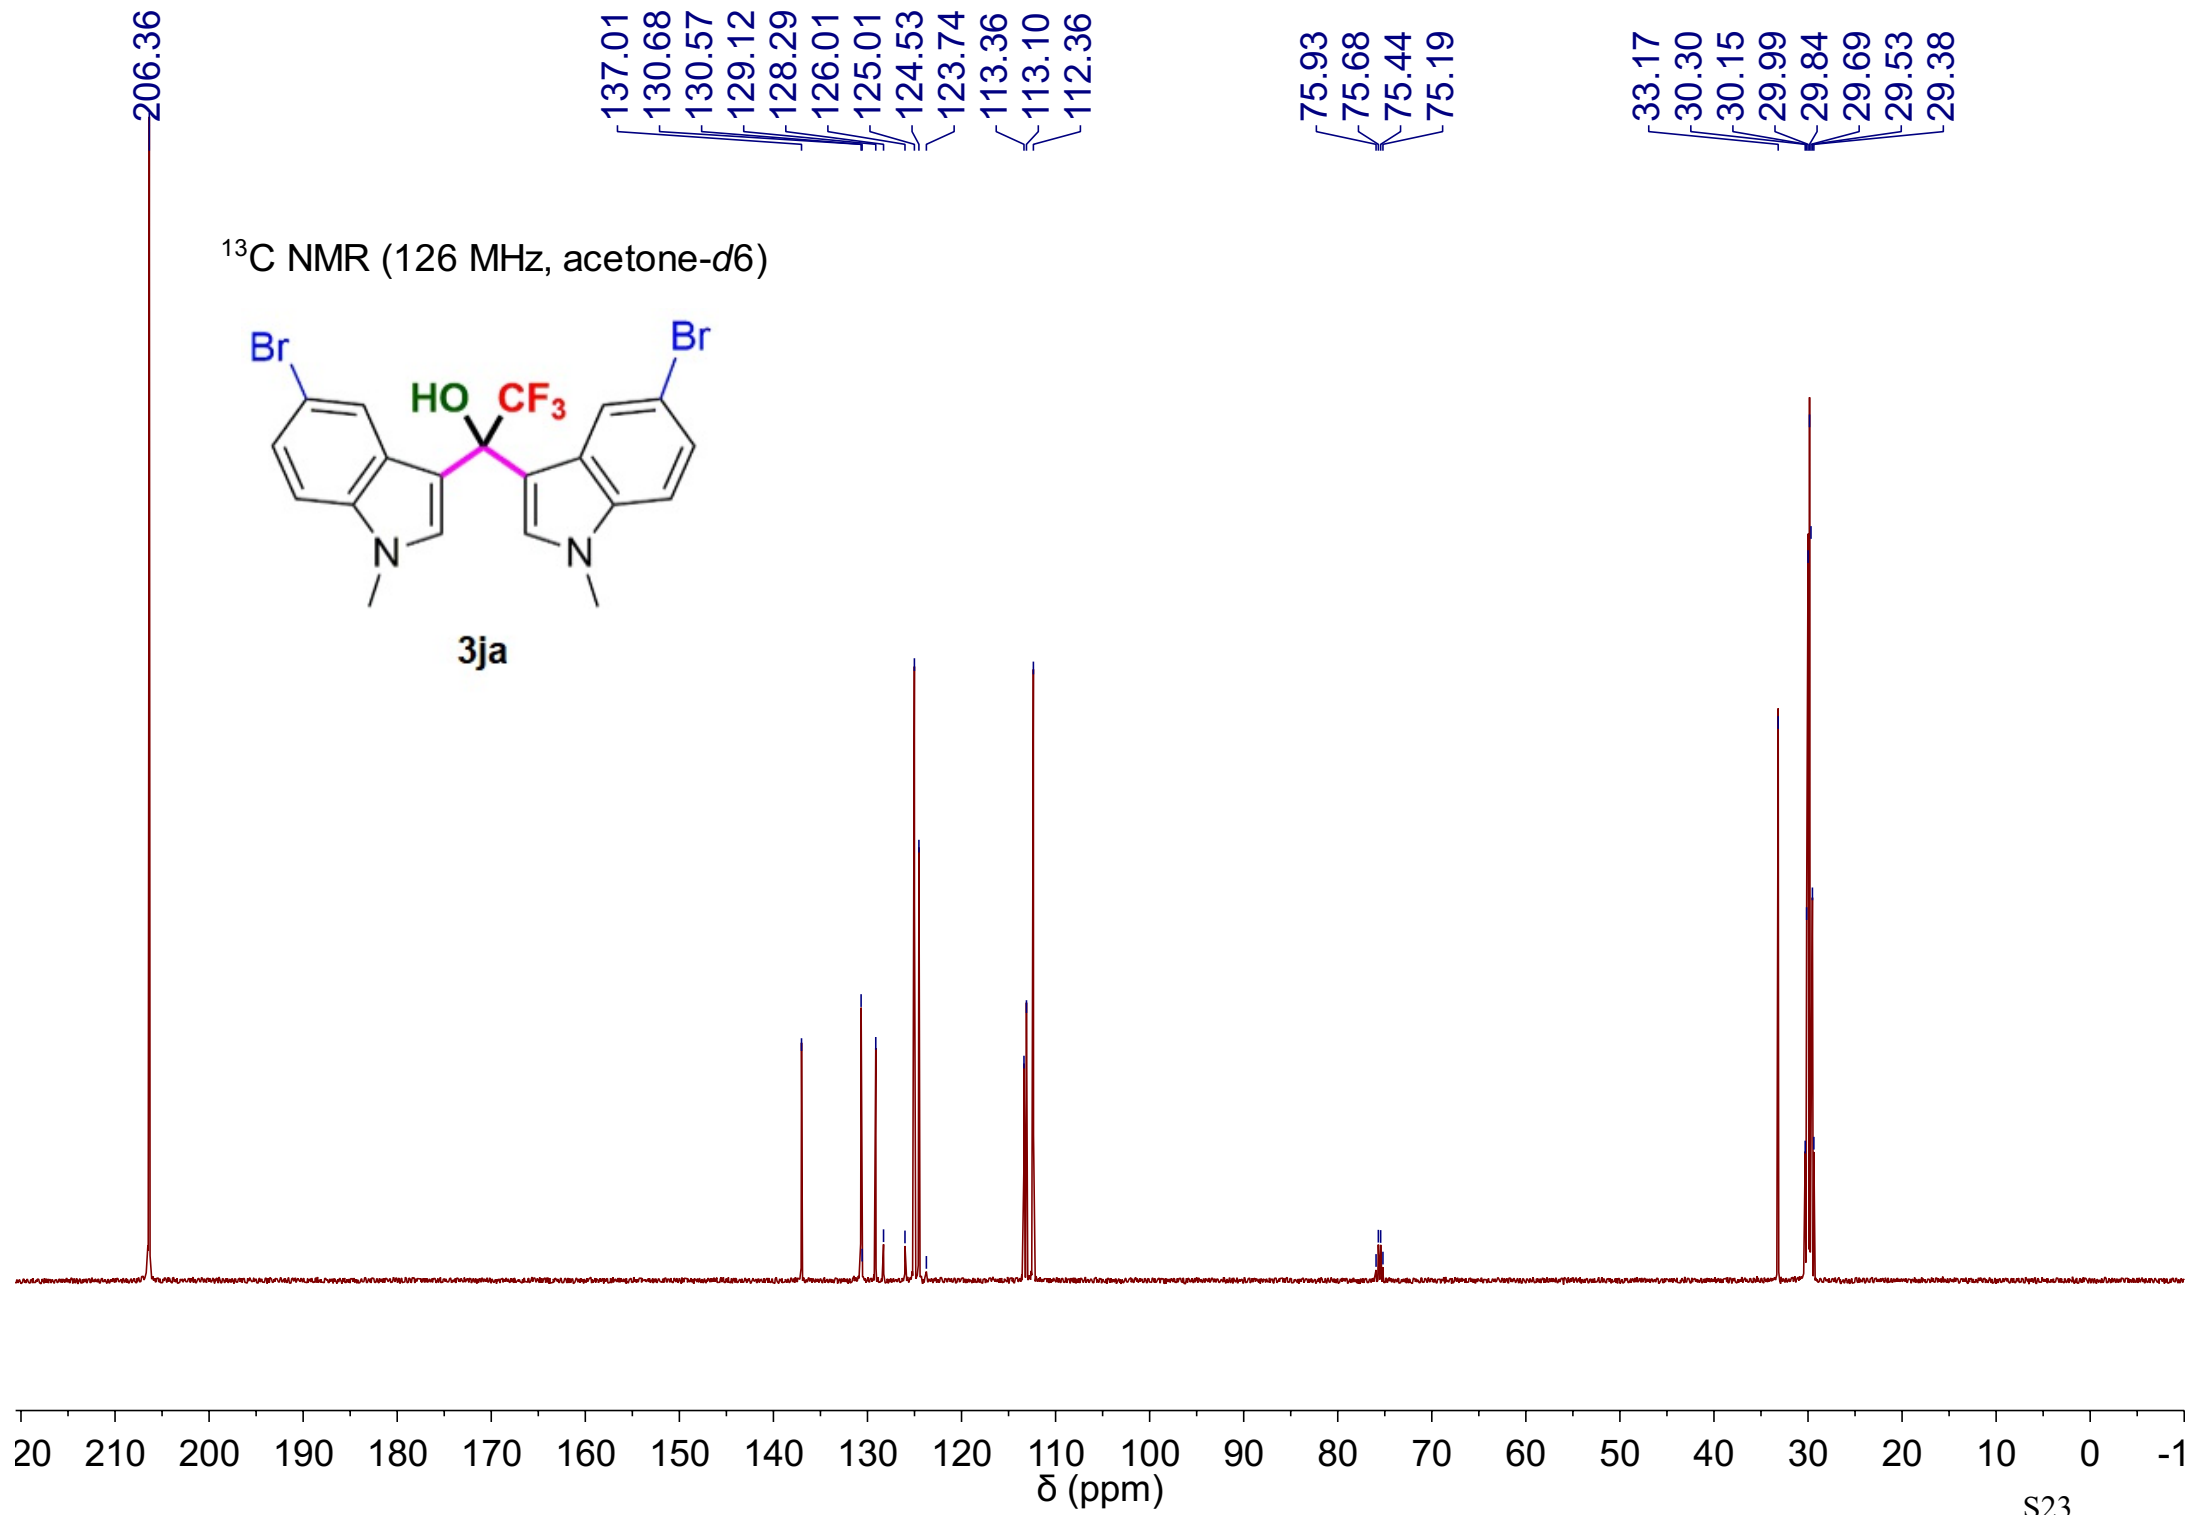



$^{19}\text{F}$  NMR (471 MHz, acetone- $d_6$ )

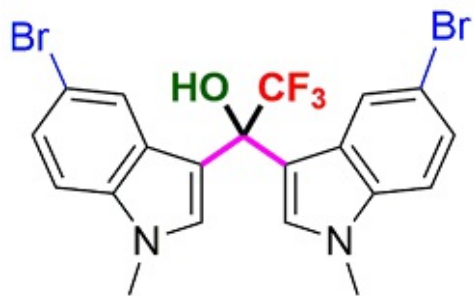

**3ja**

---77.71

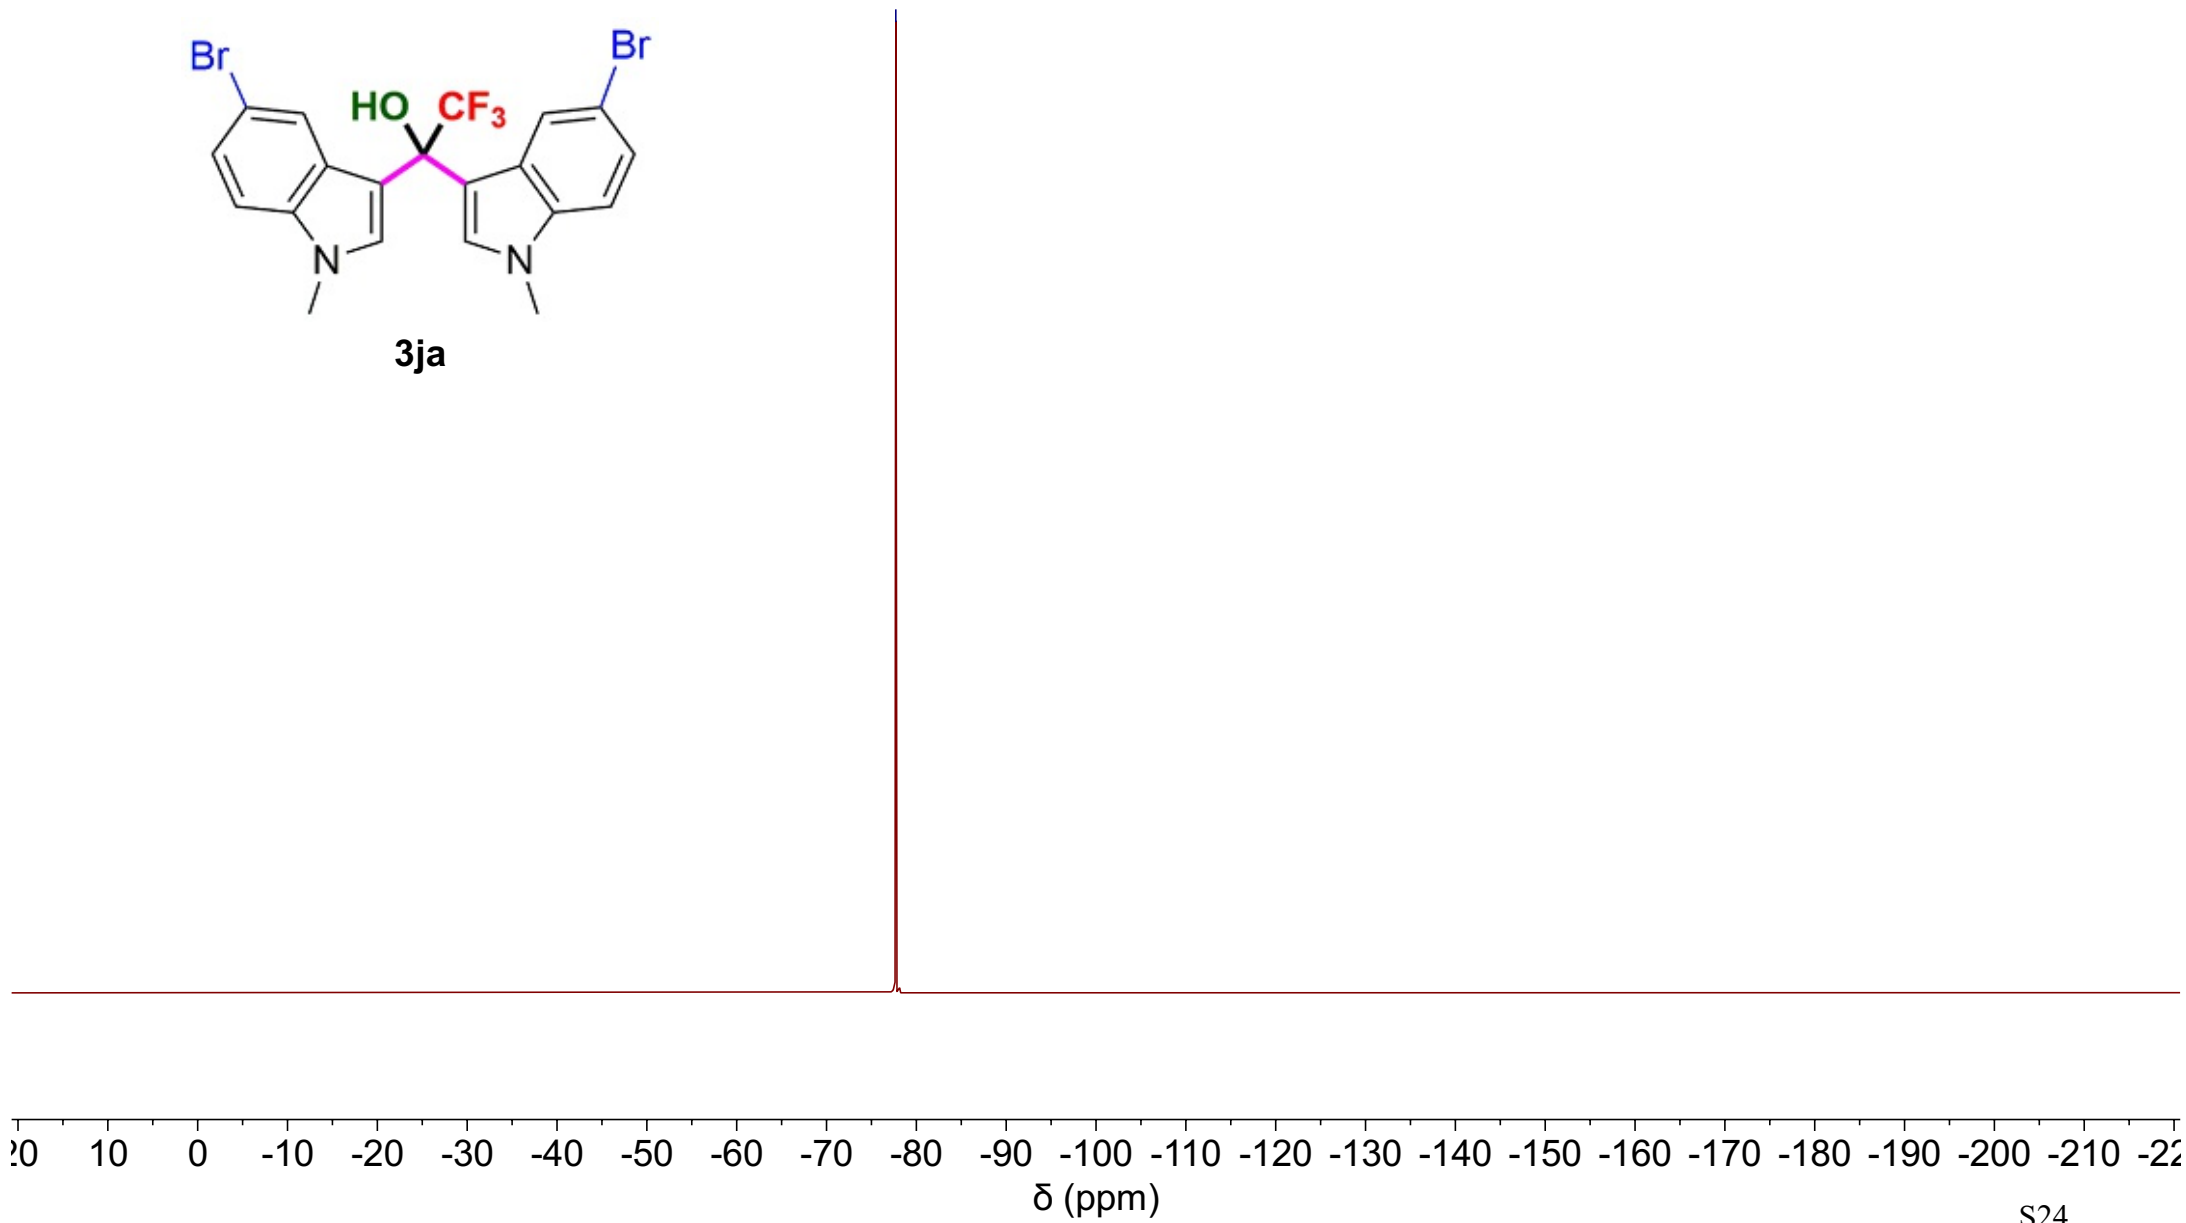

7.922  
7.419  
7.402  
7.291  
7.276  
7.259

5.773  
5.621

3.852

2.845

2.053  
2.050

0.000

<sup>1</sup>H NMR (500 MHz, acetone-*d*<sub>6</sub>)

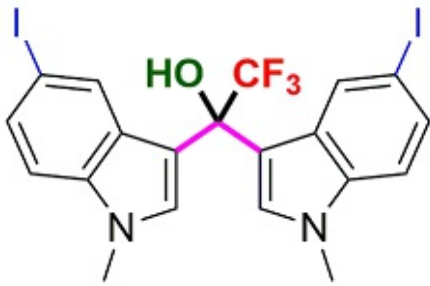

3ka

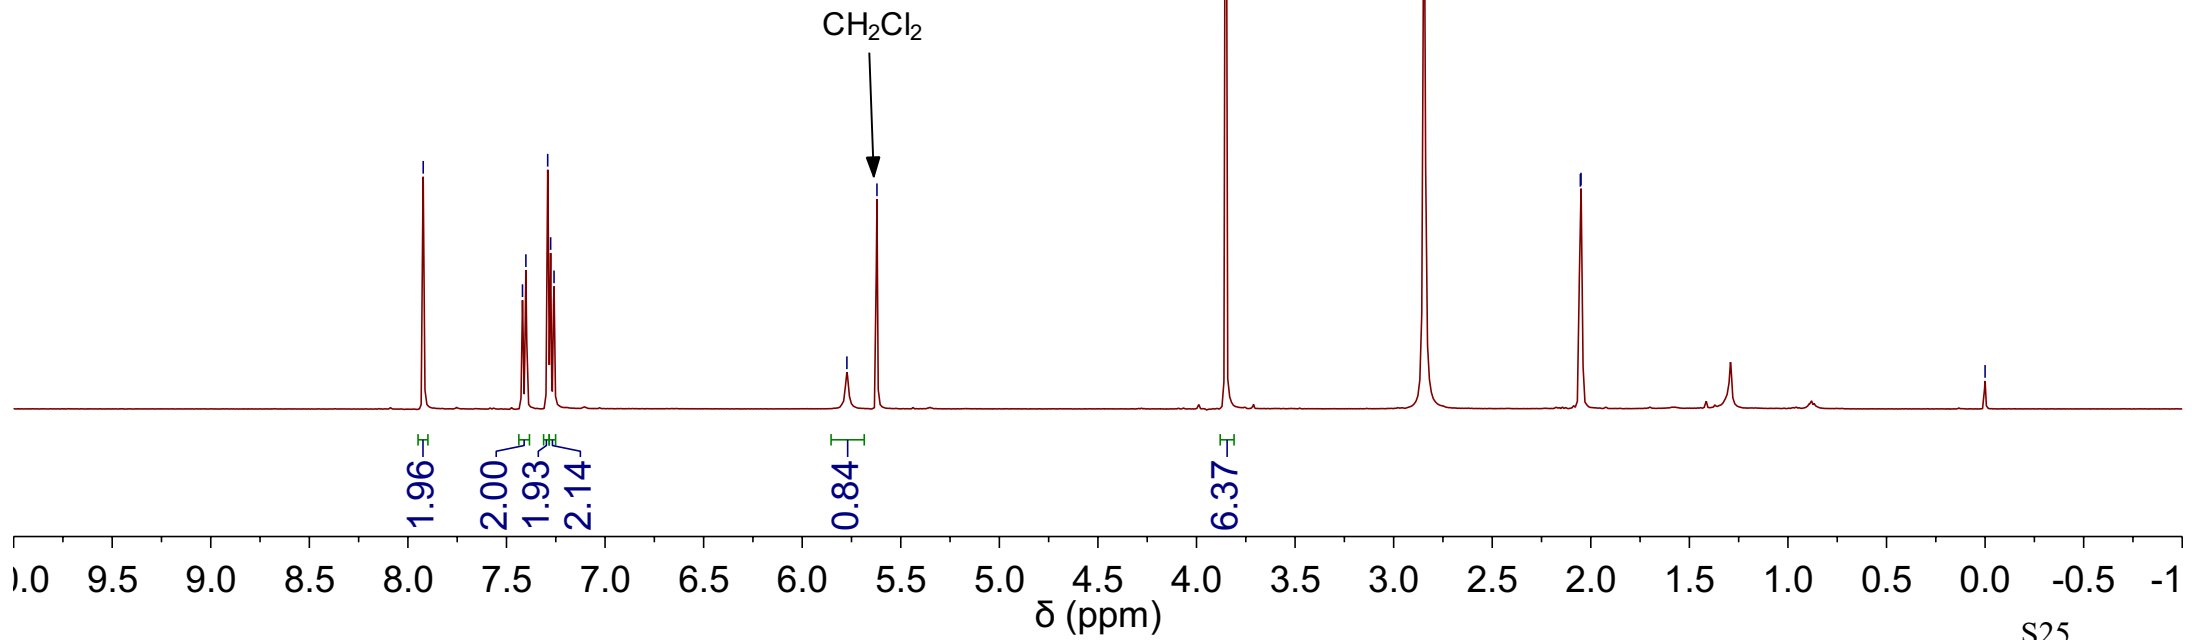

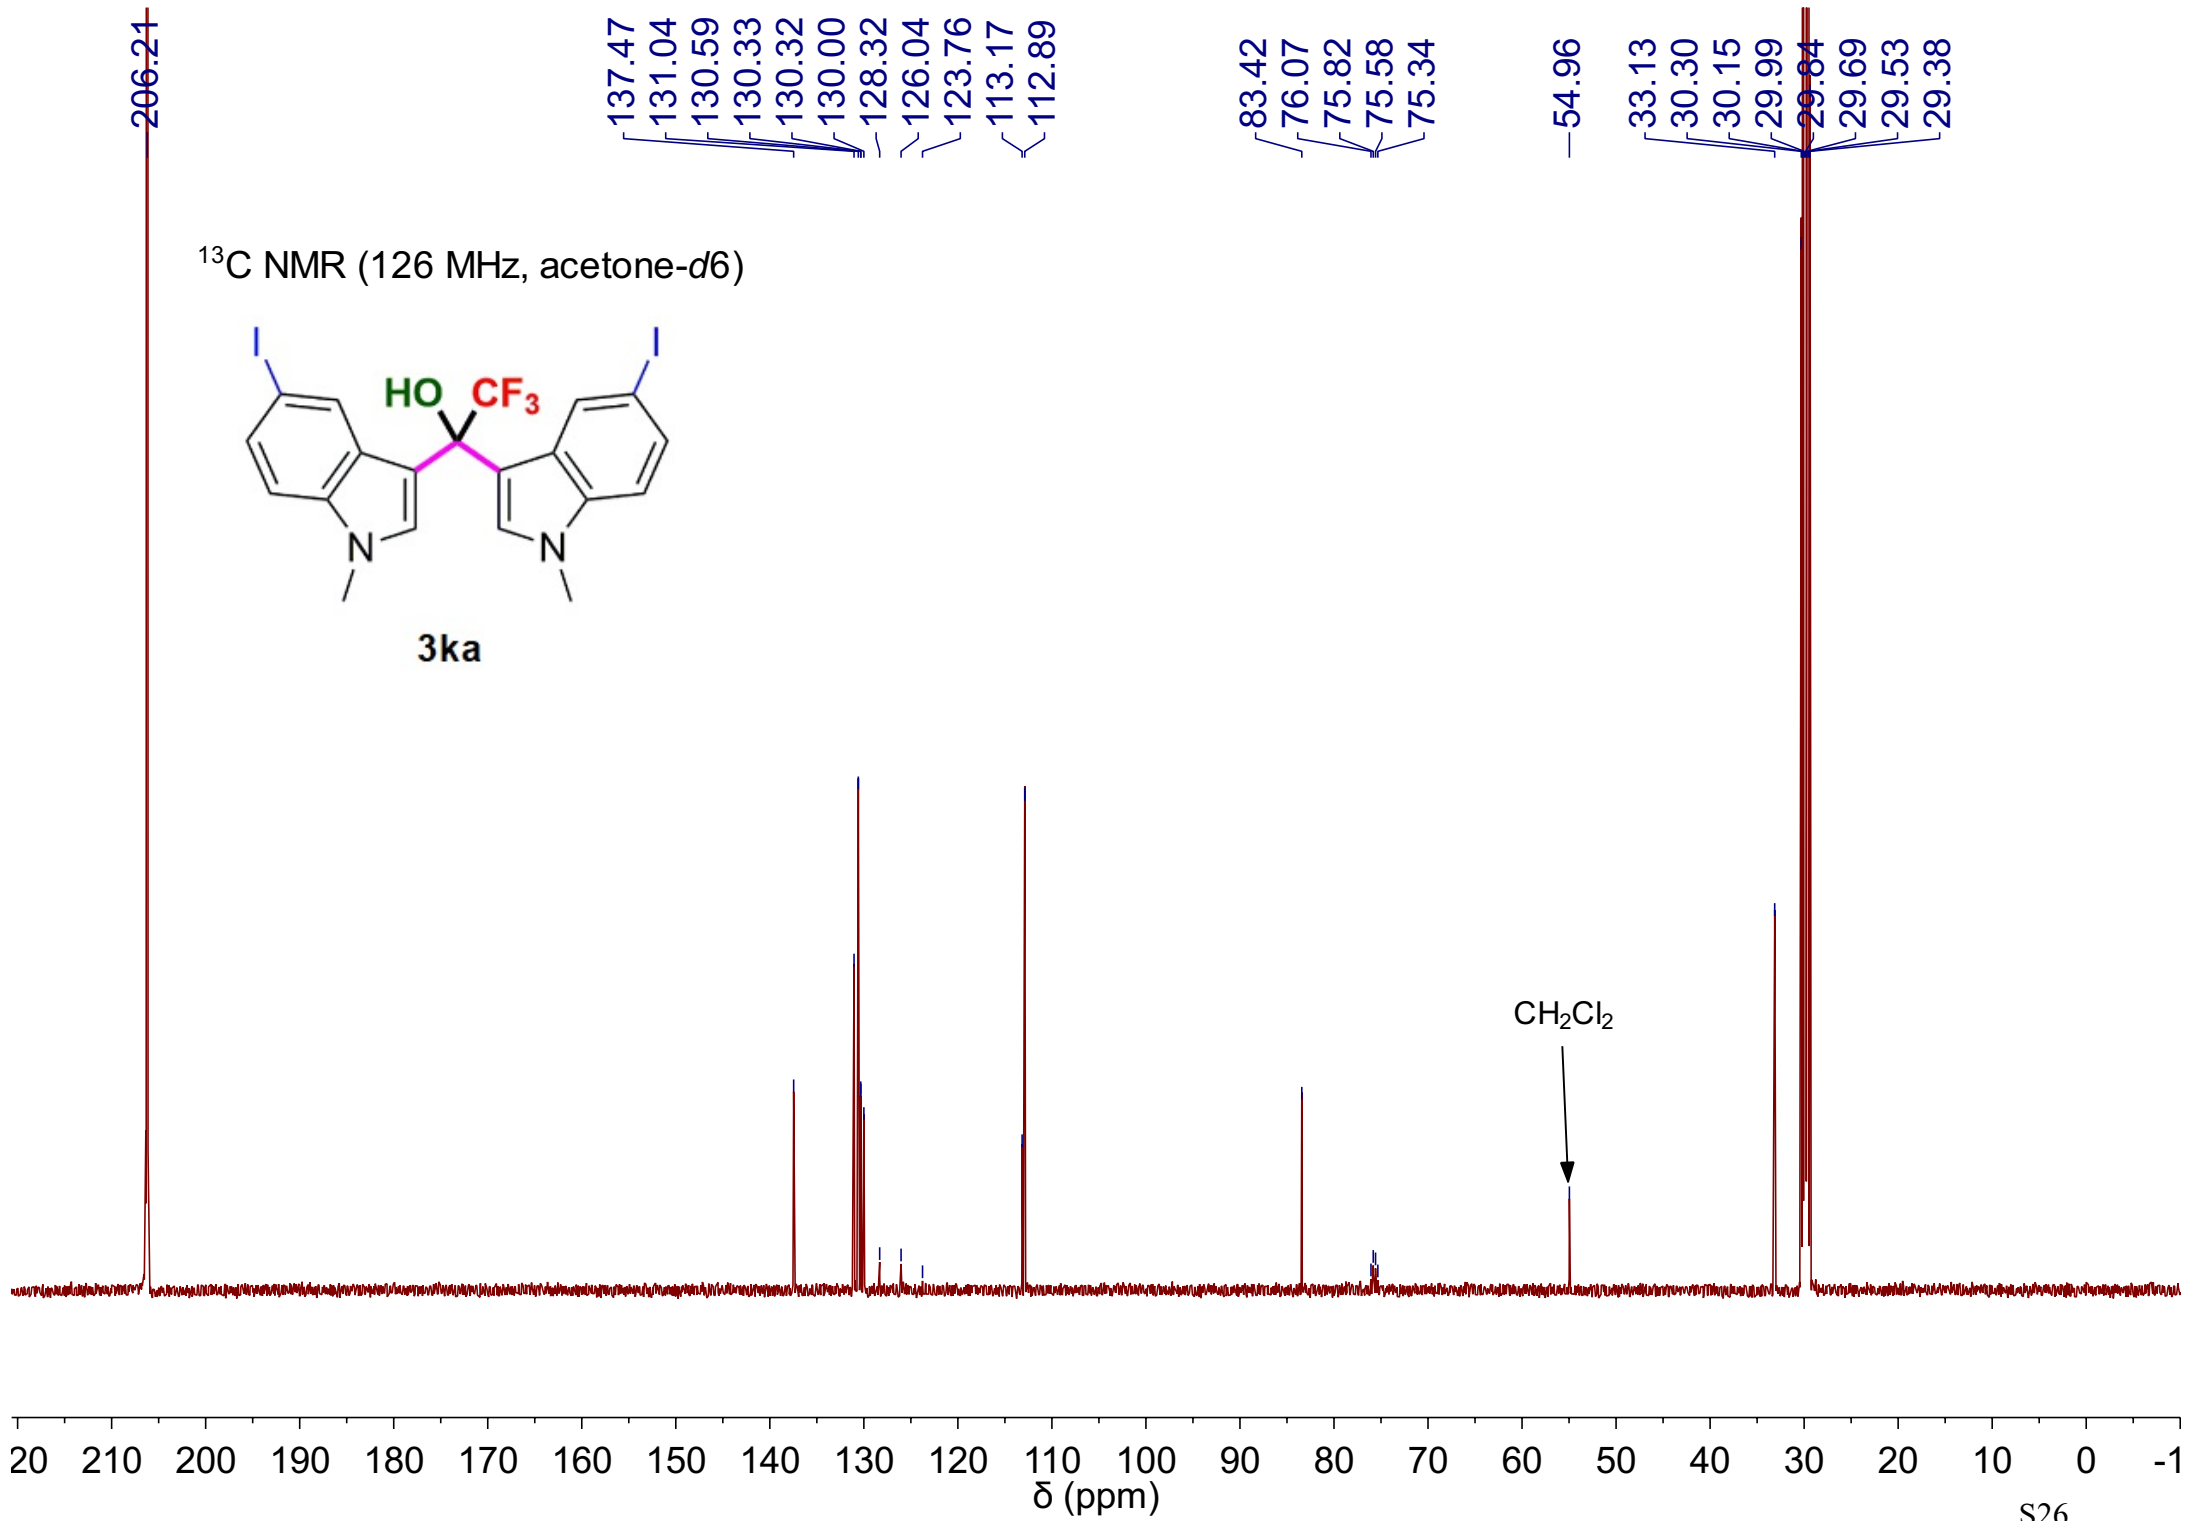

$^{19}\text{F}$  NMR (471 MHz, acetone- $d_6$ )

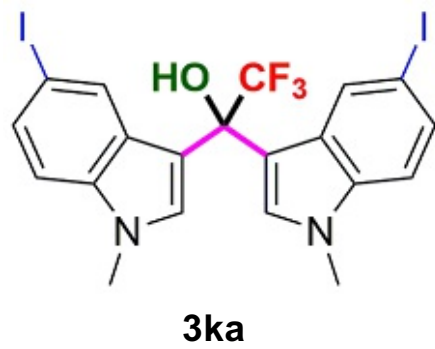

---77.81

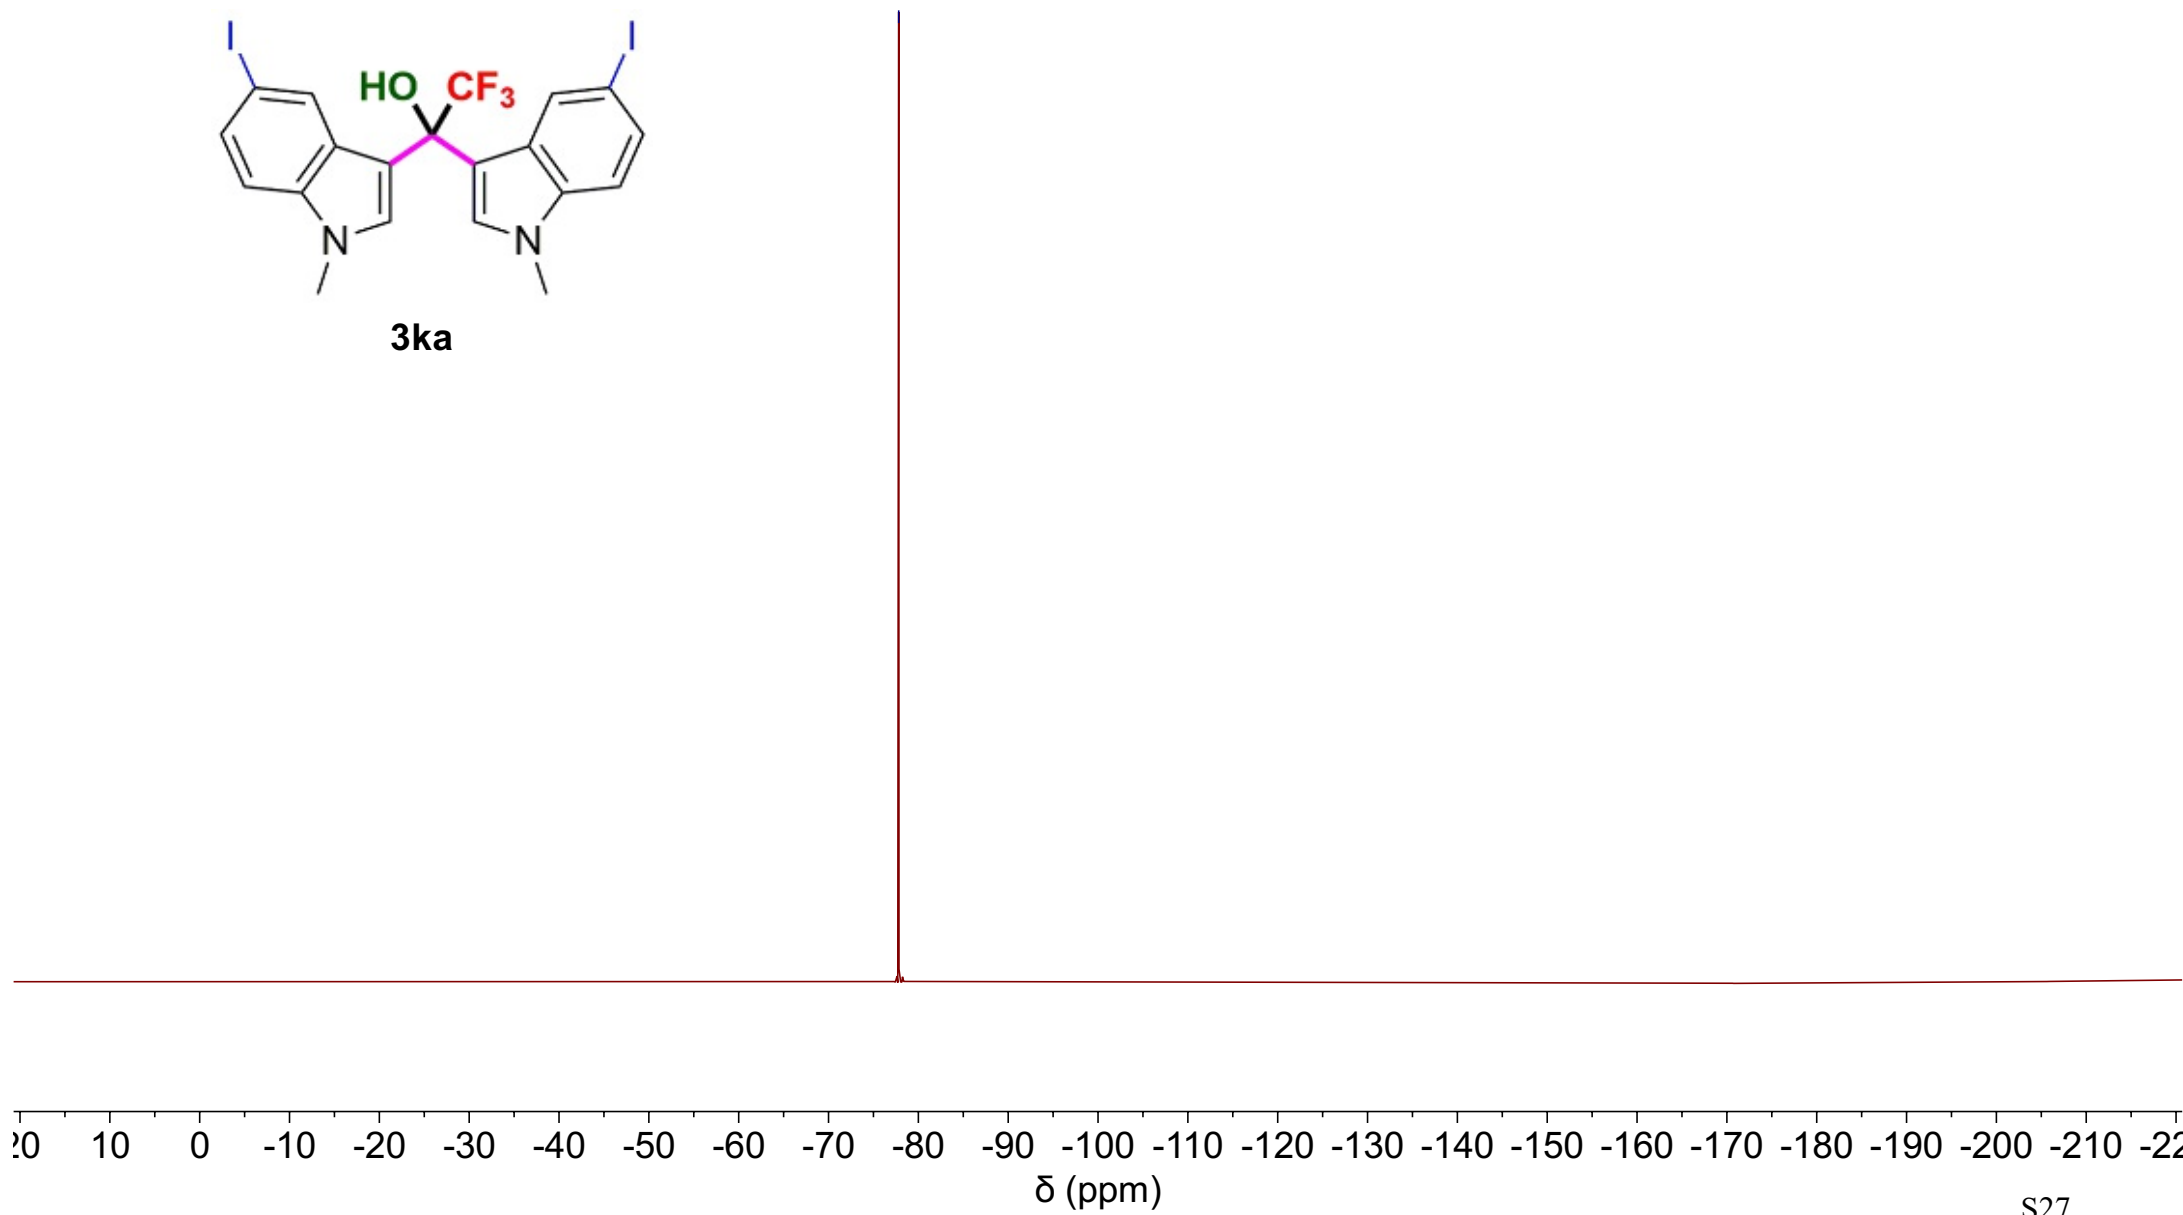

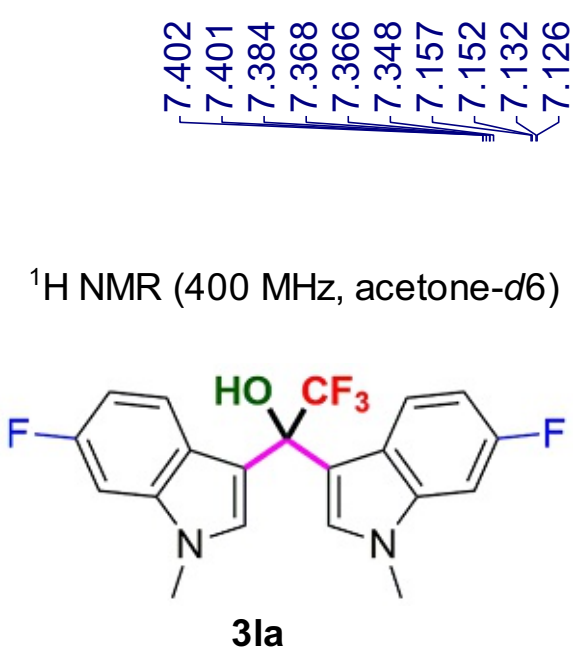

7.402  
7.401  
7.384  
7.368  
7.366  
7.348  
7.157  
7.152  
7.132  
7.126  
6.694  
6.692  
6.671  
6.670  
6.648  
6.645  
5.632

3.838

2.844  
2.811  
2.061  
2.056  
2.050  
2.045  
2.039

-0.002

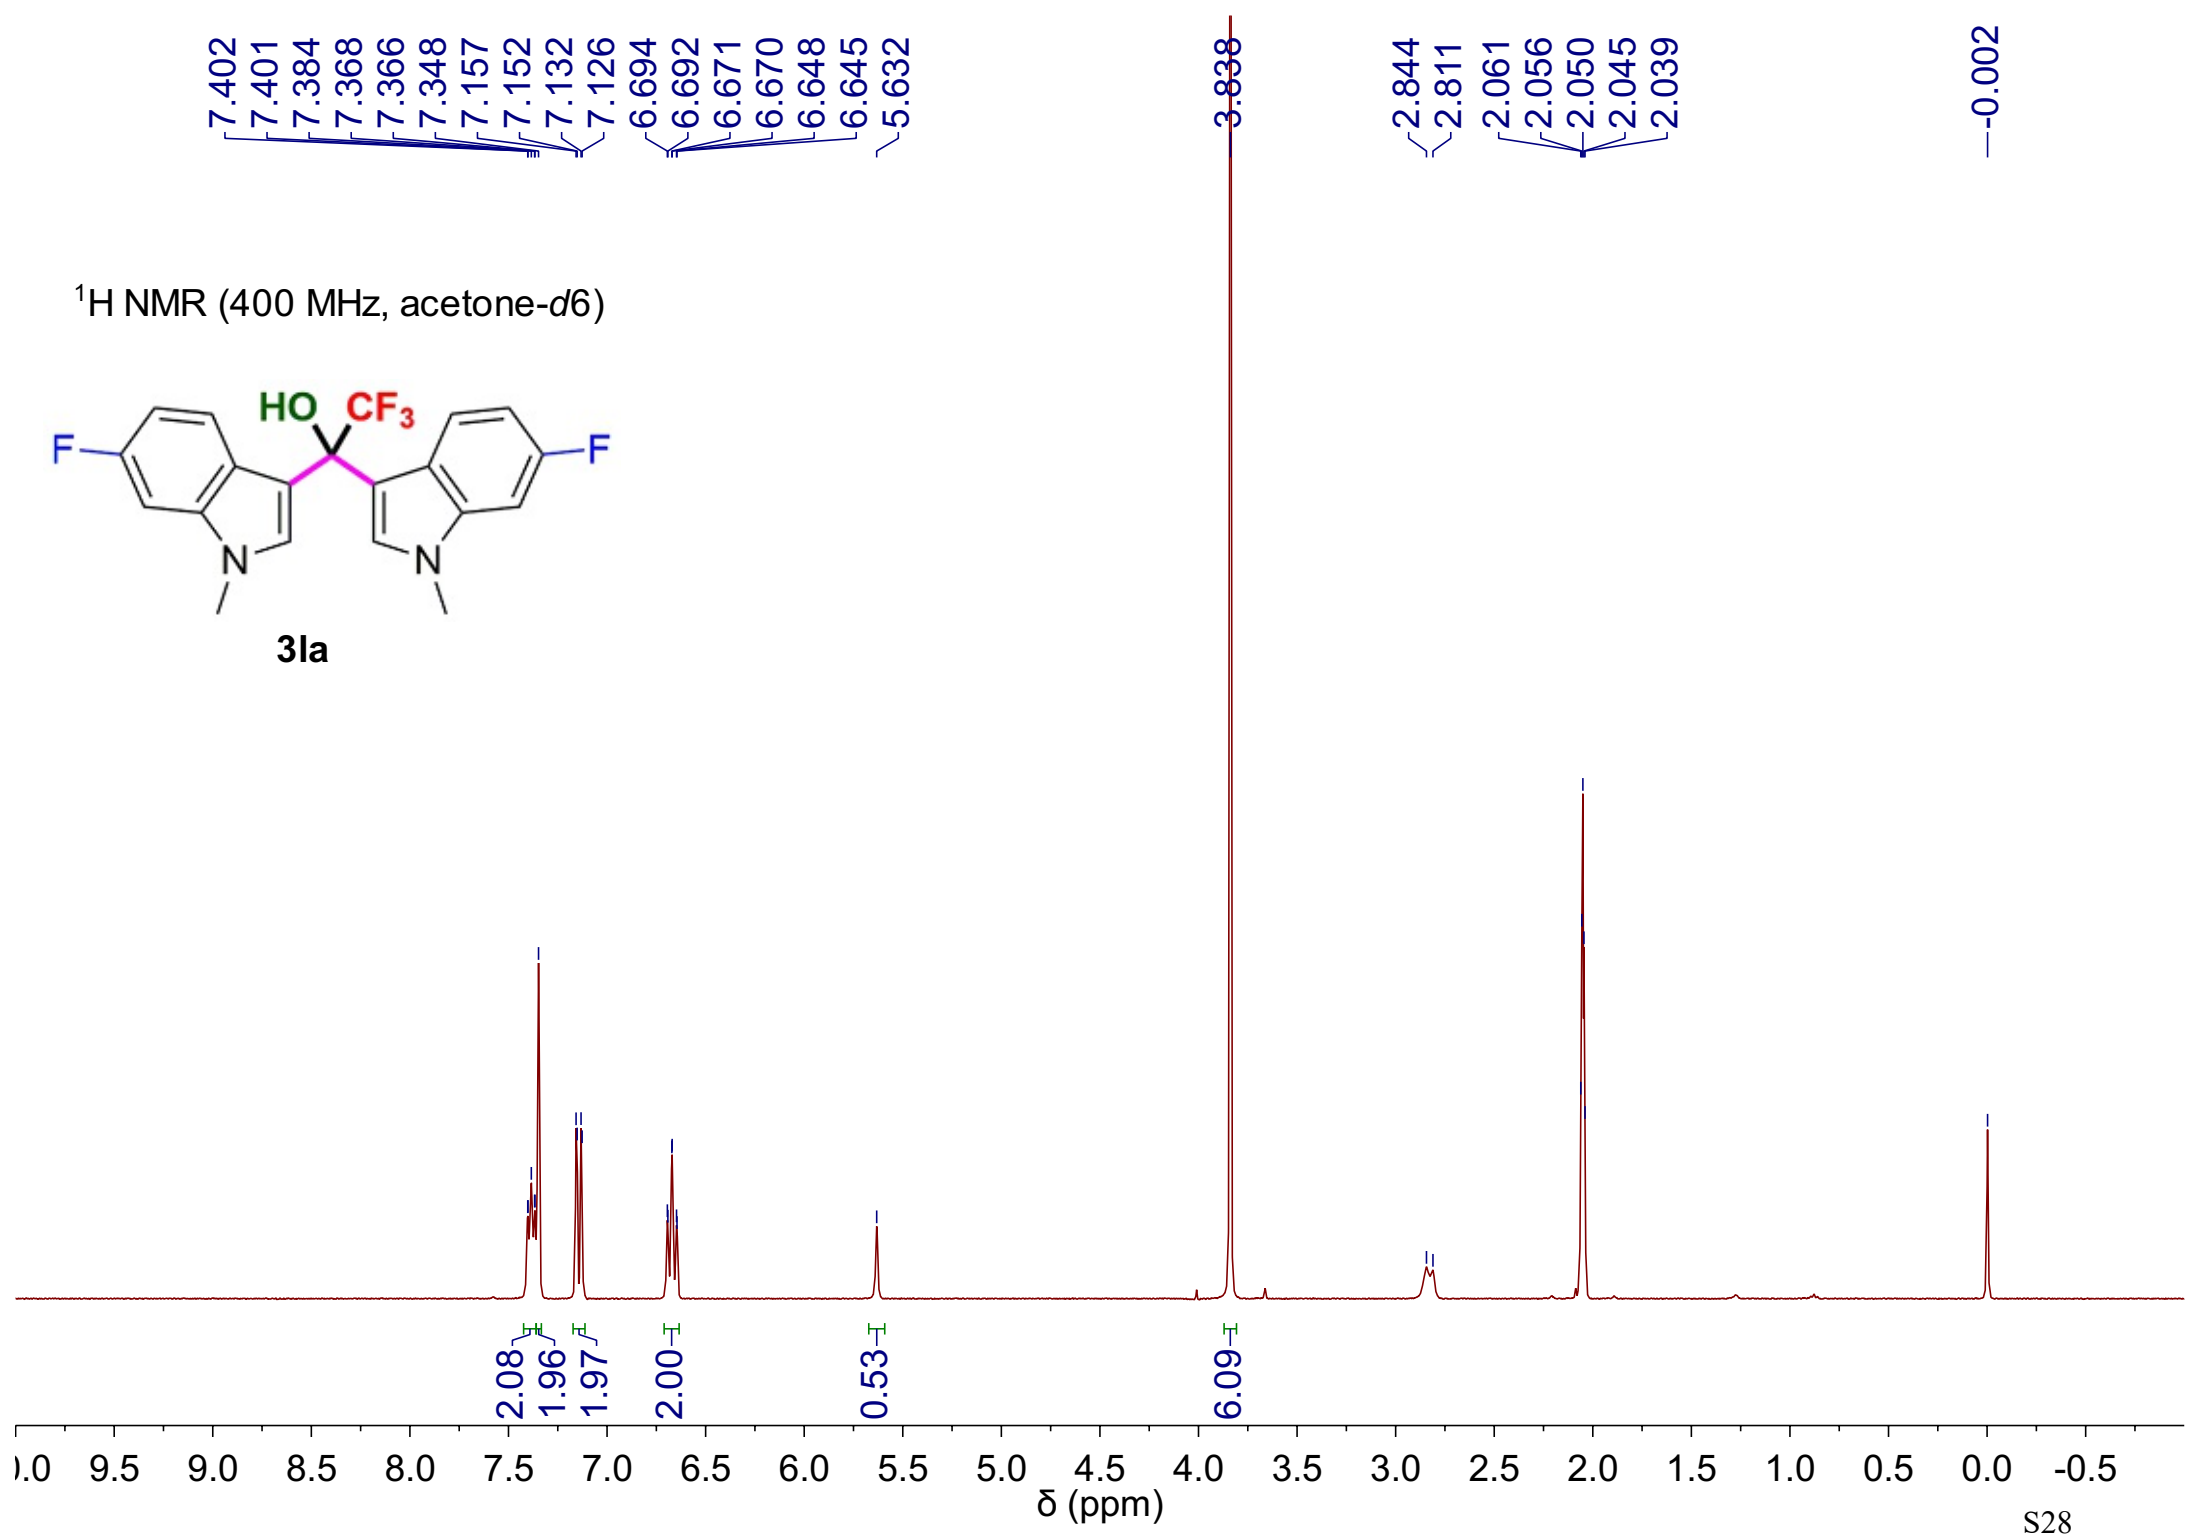

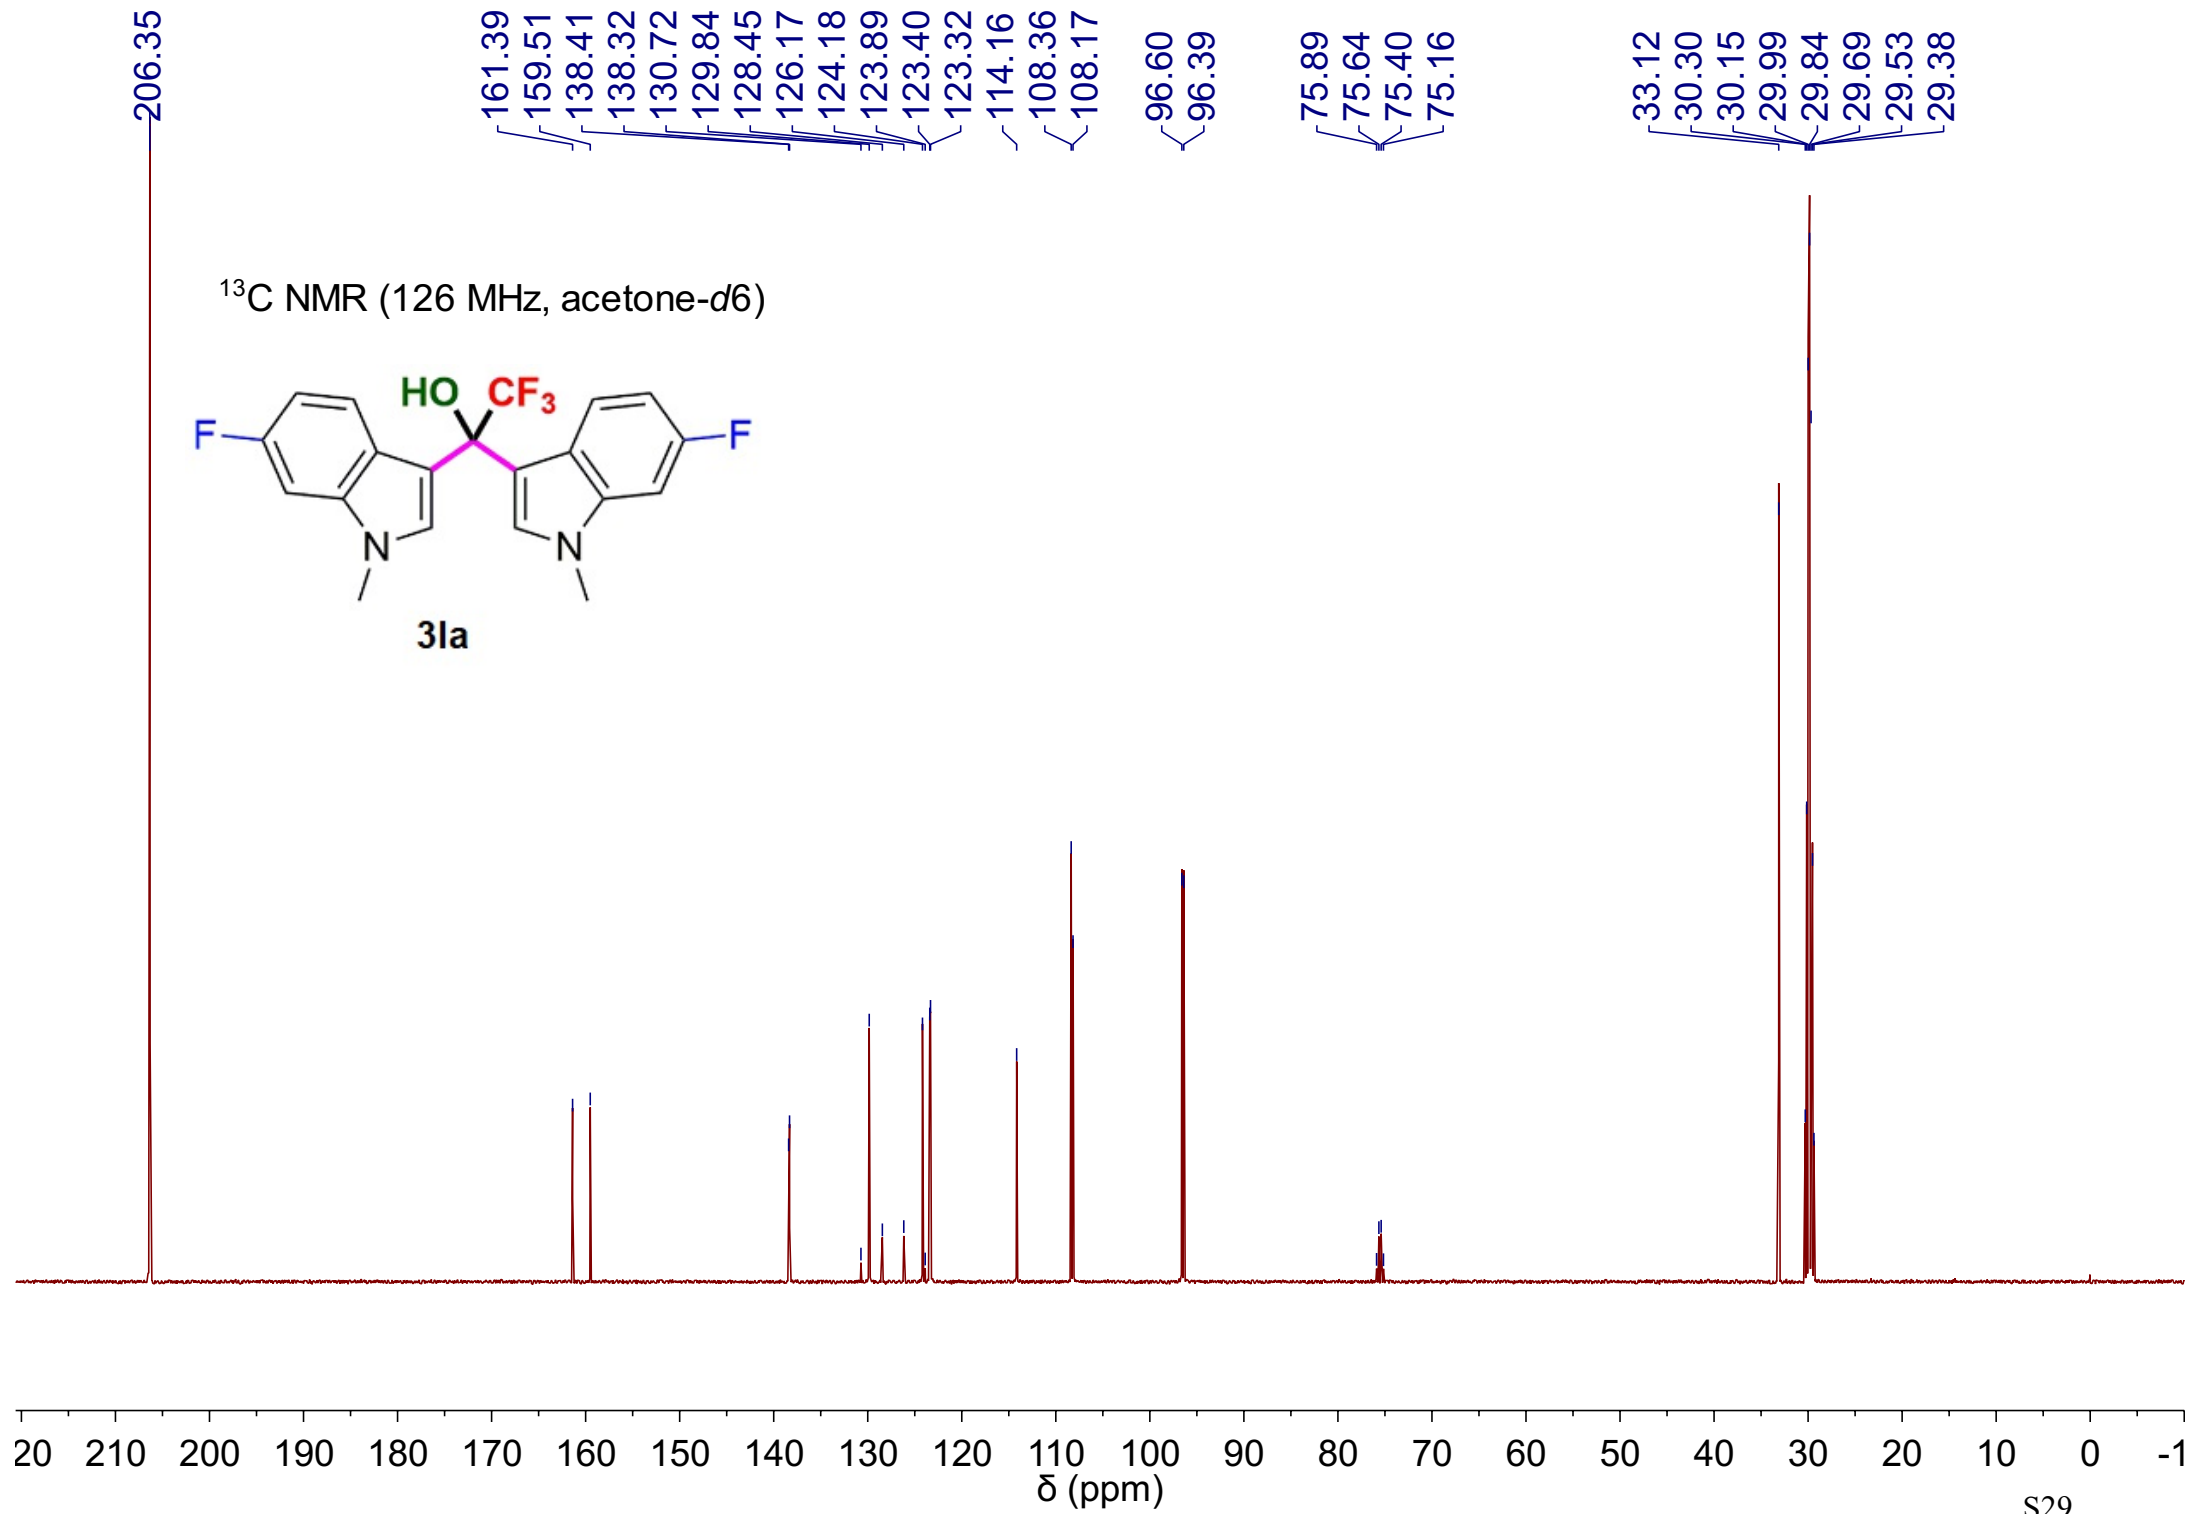

$^{19}\text{F}$  NMR (471 MHz, acetone- $d_6$ )

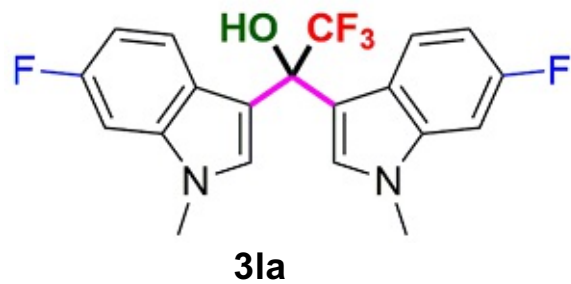

--77.58

--122.54

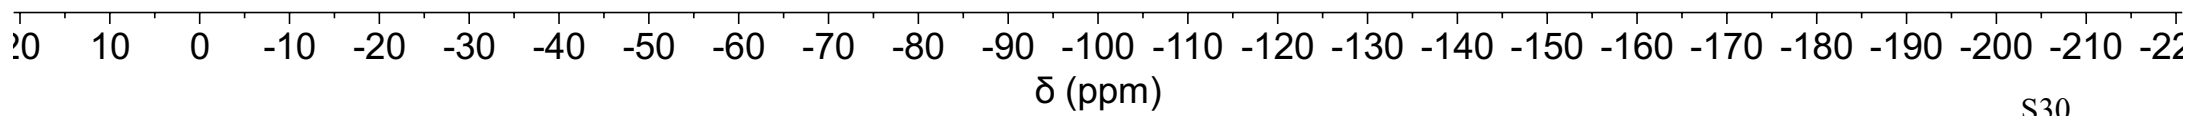

<sup>1</sup>H NMR (400 MHz, acetone-*d*<sub>6</sub>)

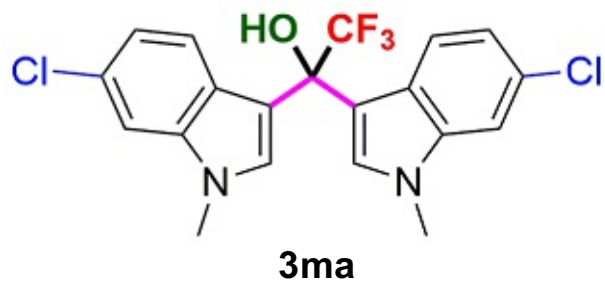

7.447  
7.423  
6.902  
6.881

5.787

3.844

3.030

2.050

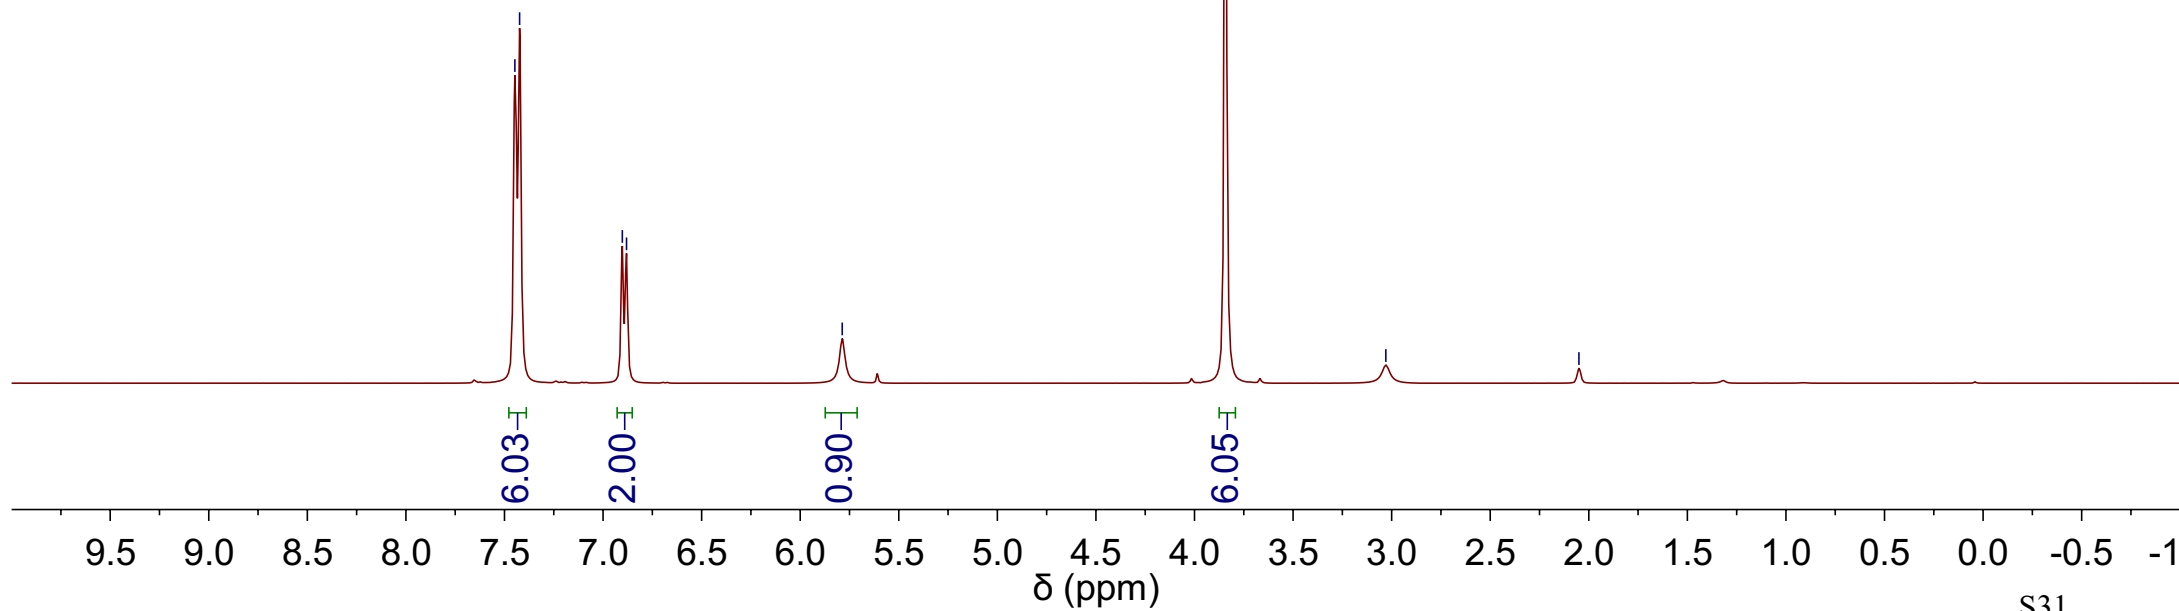



-206.48

138.67  
130.63  
130.24  
128.35  
127.95  
126.18  
126.07  
123.80  
123.36  
120.31  
114.07  
110.31

75.72  
75.48  
75.23  
74.99

33.11  
30.30  
30.15  
29.99  
29.84  
29.69  
29.53  
29.38

<sup>13</sup>C NMR (126 MHz, acetone-d<sub>6</sub>)

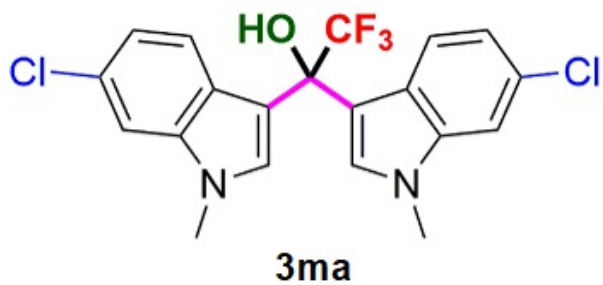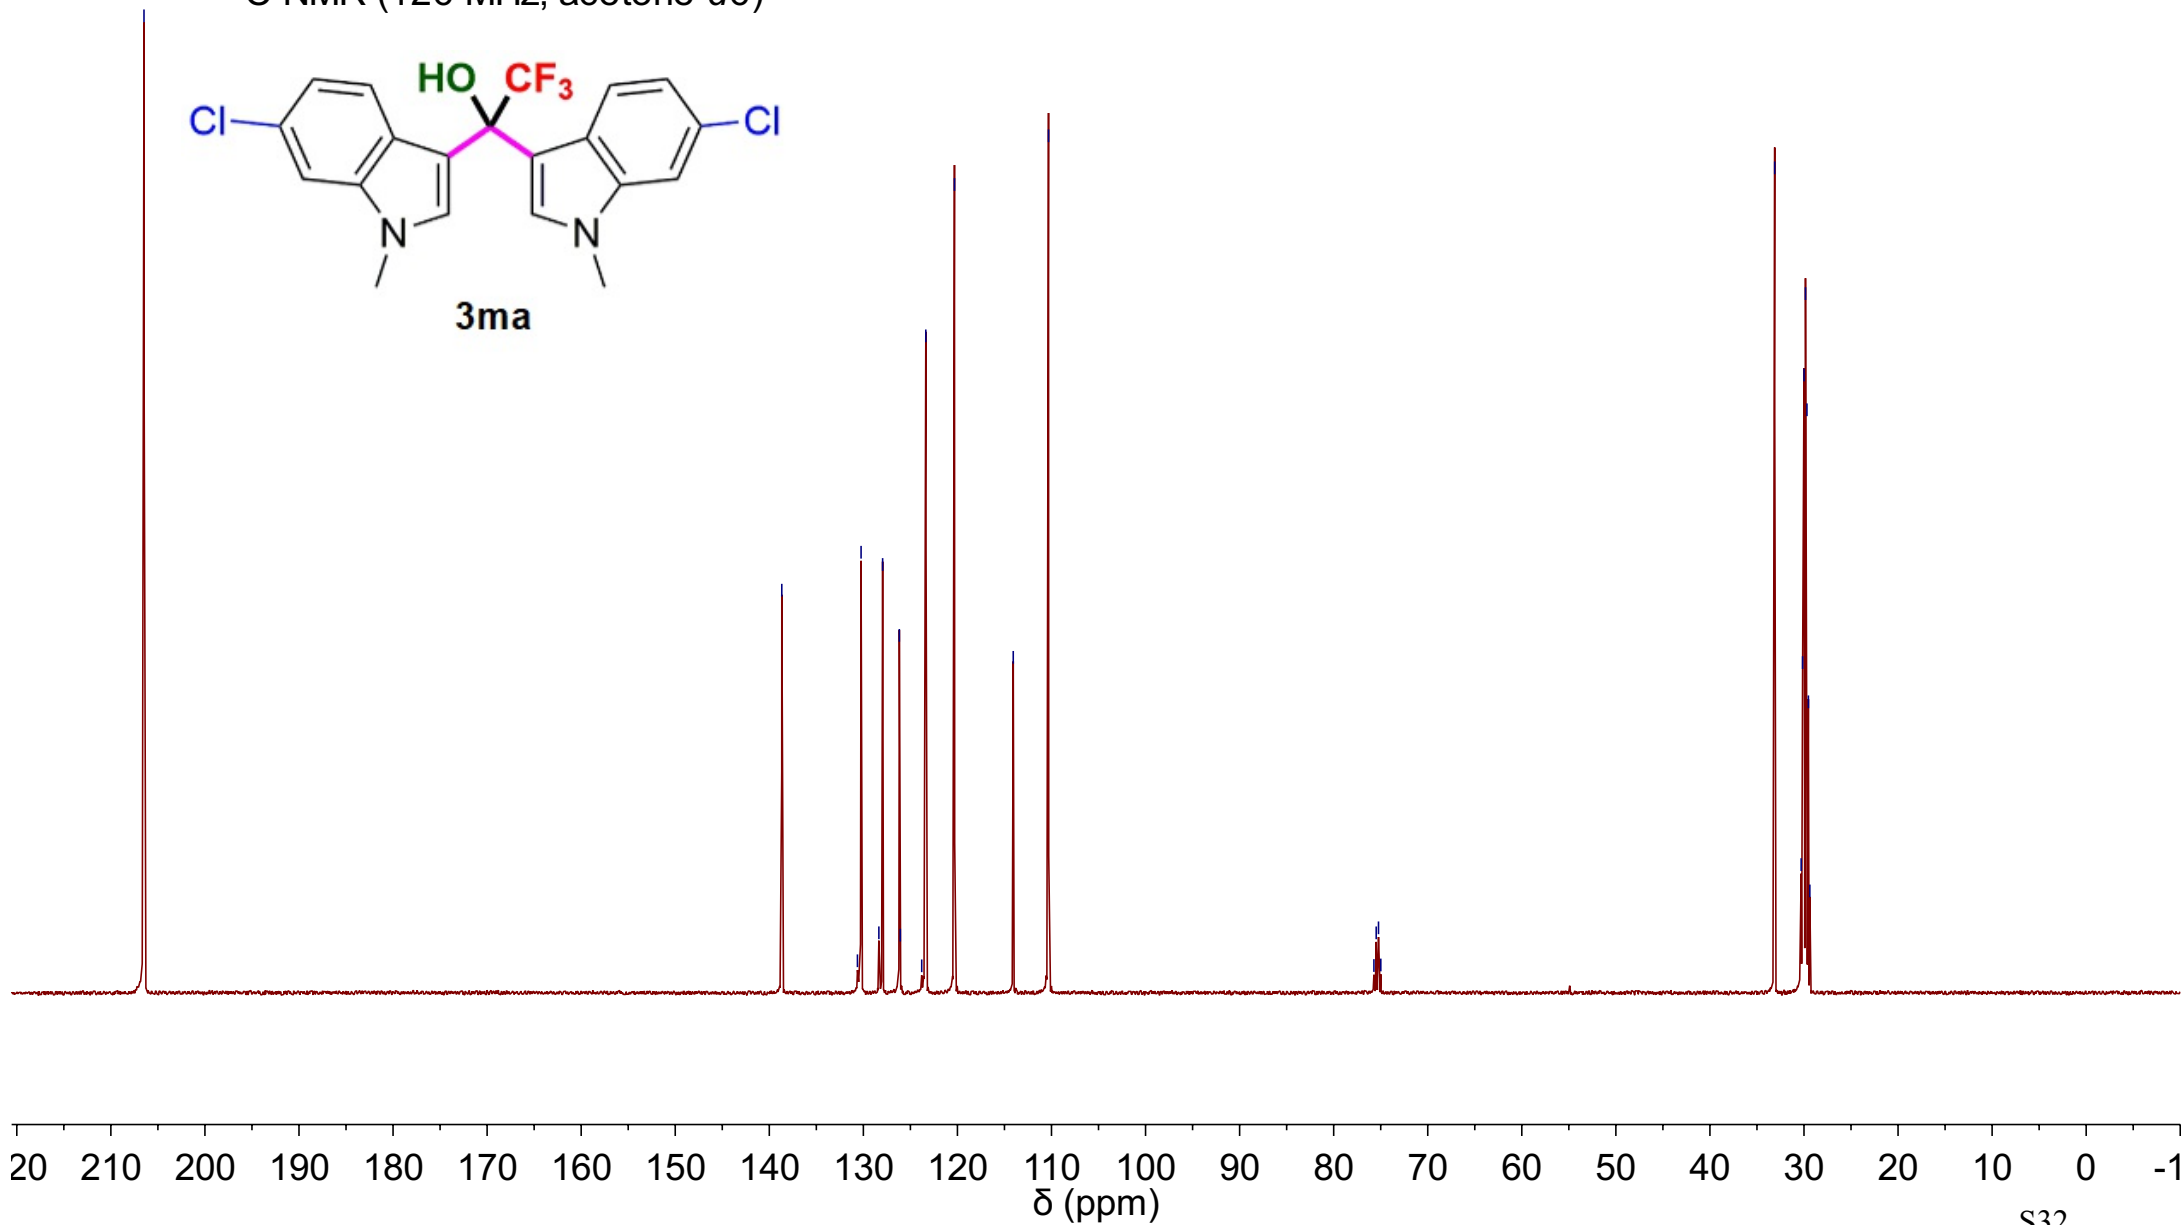

$^{19}\text{F}$  NMR (471 MHz, acetone- $d_6$ )

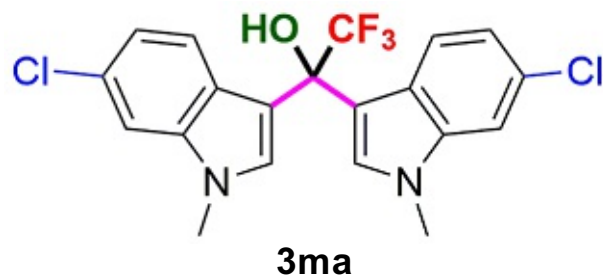

--77.53

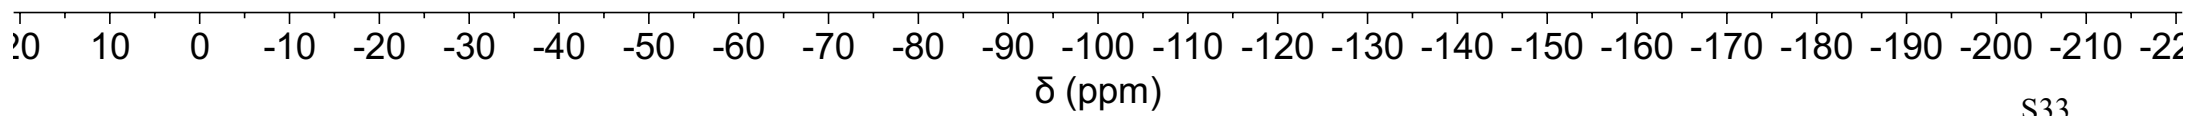

7.590  
7.586  
7.369  
7.320  
7.298  
6.989  
6.984  
6.967  
6.963

5.700

3.873

2.845  
2.812  
2.061  
2.055  
2.050  
2.044  
2.039

-0.005

<sup>1</sup>H NMR (400 MHz, acetone-*d*<sub>6</sub>)

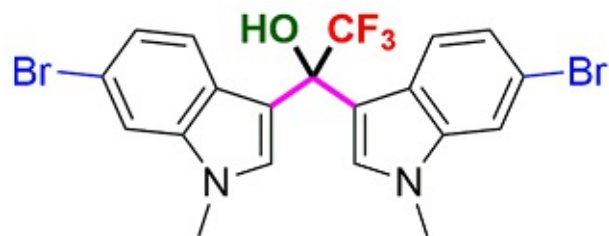

3na

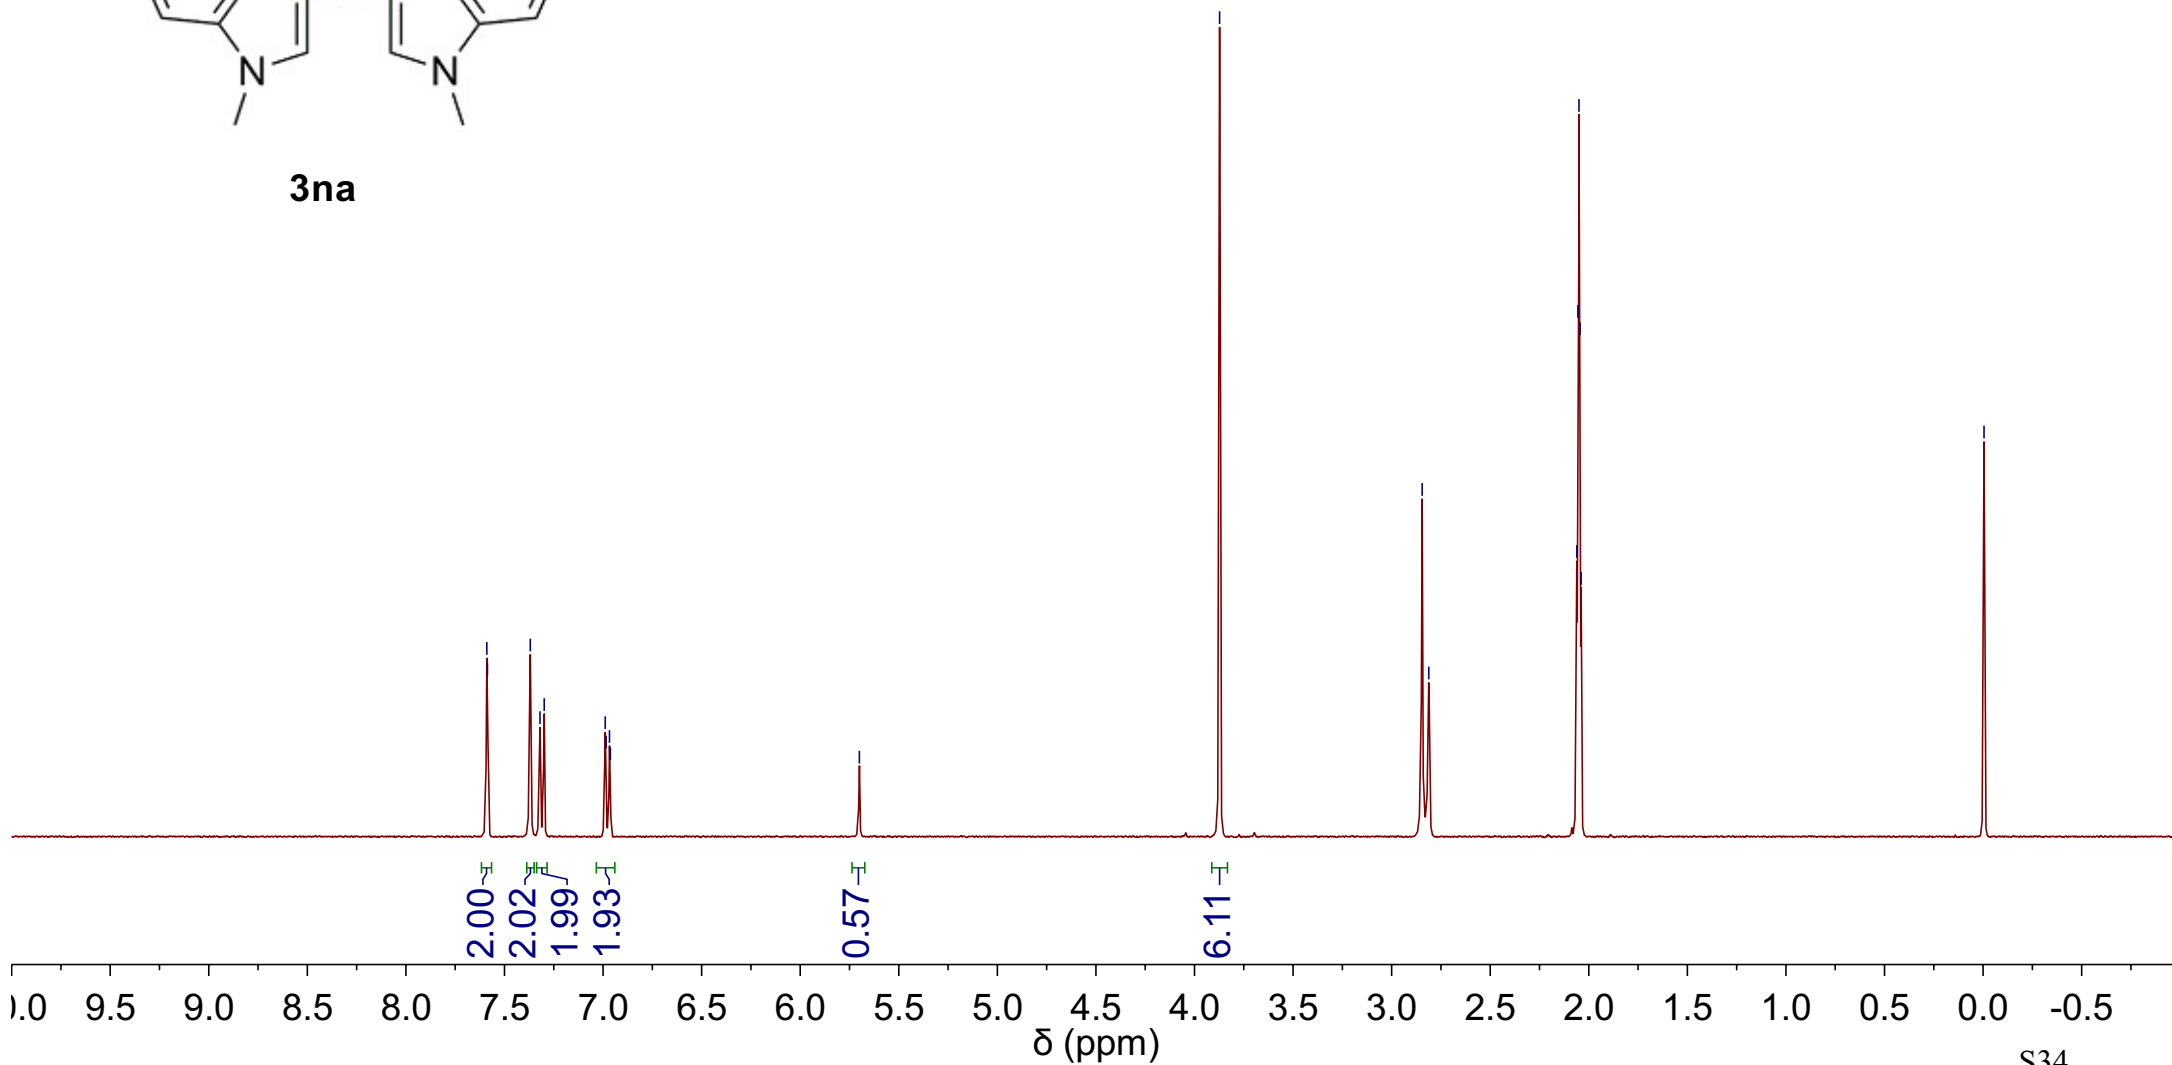

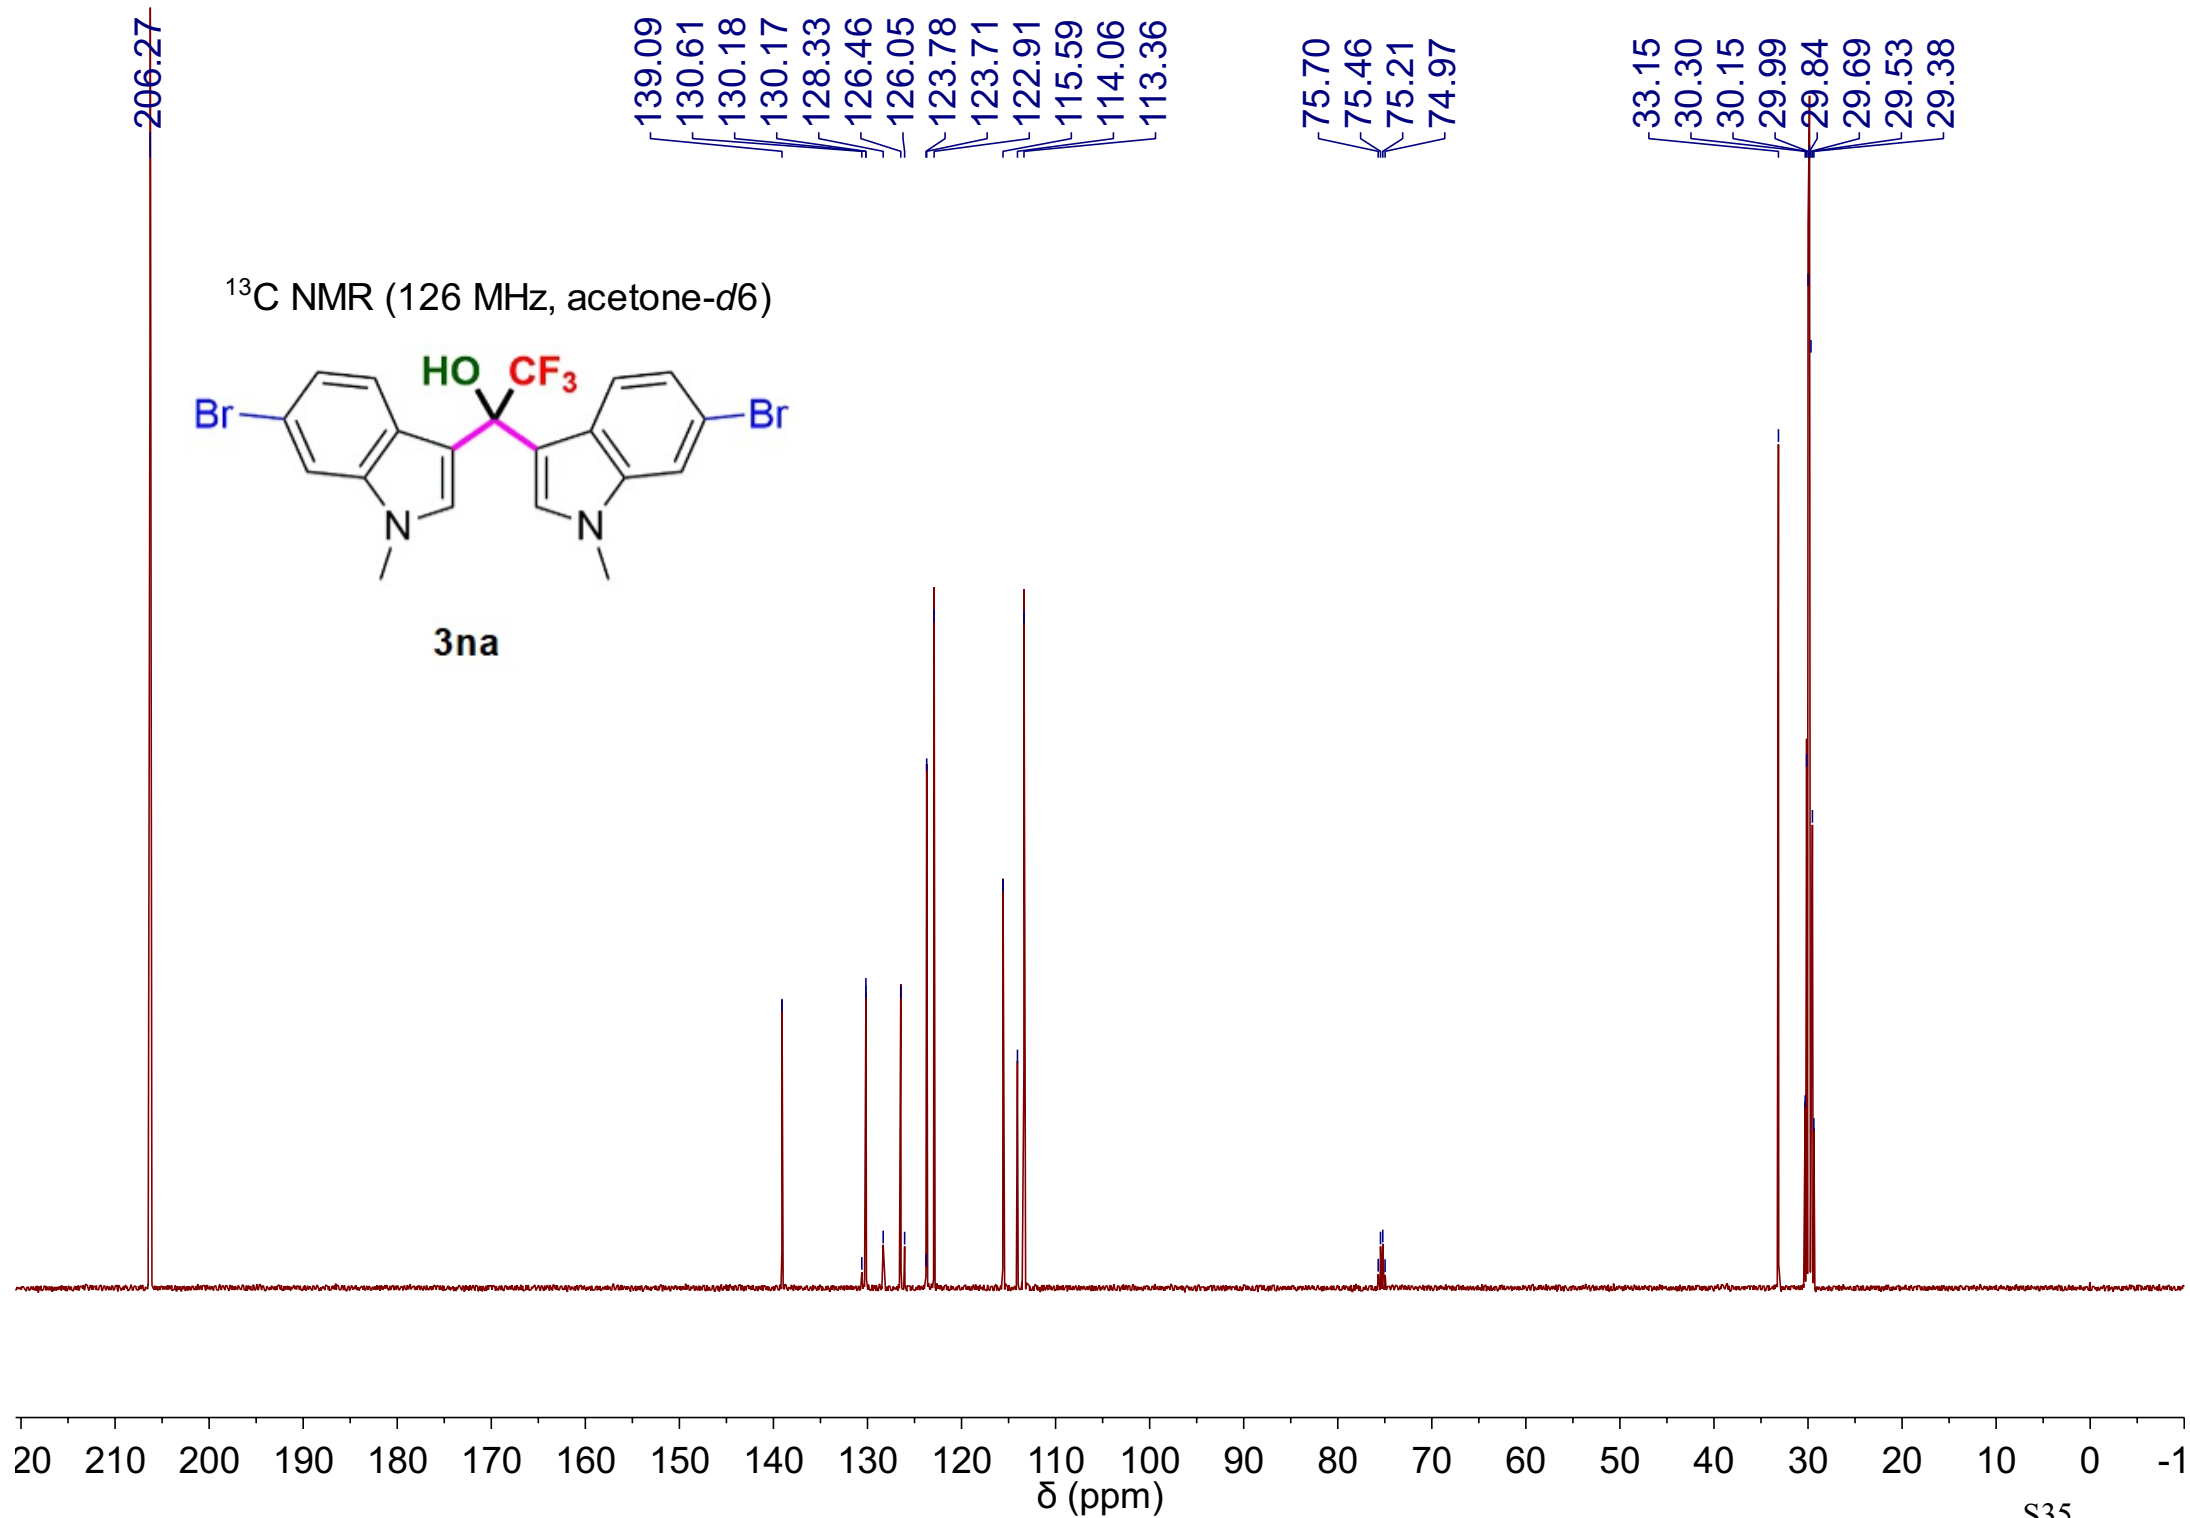

$^{19}\text{F}$  NMR (471 MHz, acetone- $d_6$ )

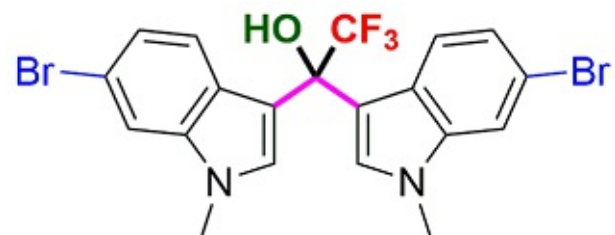

3na

---77.63

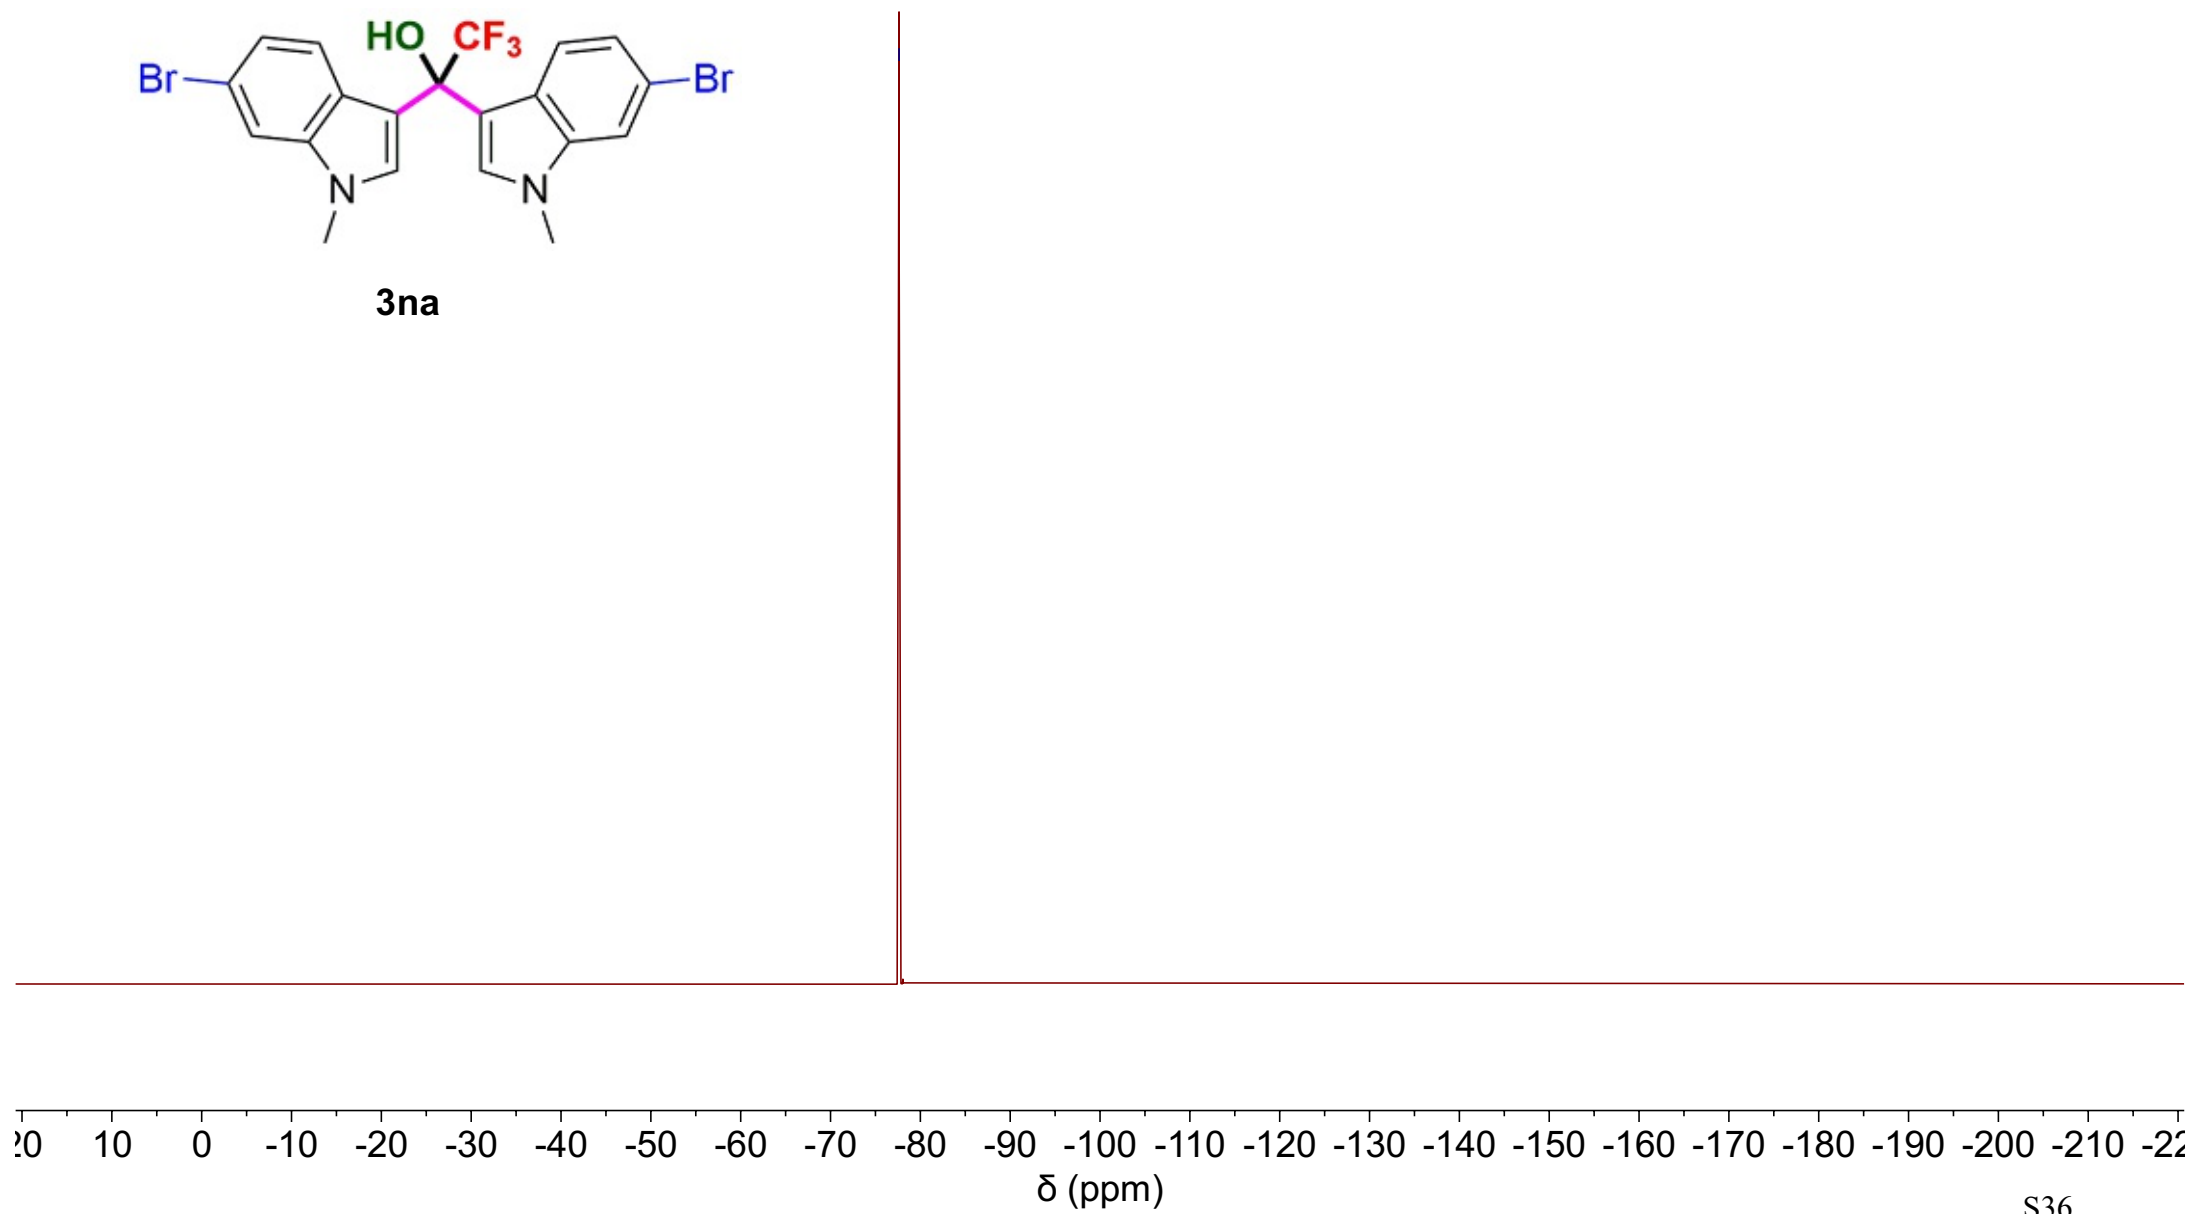

<sup>1</sup>H NMR (400 MHz, acetone-*d*<sub>6</sub>)

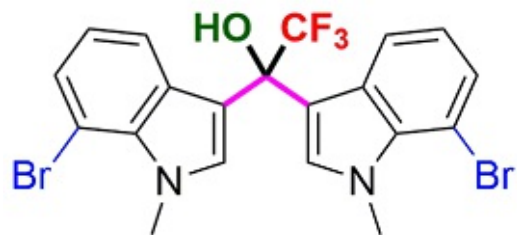

**3oa**

7.459  
7.439  
7.388  
7.267  
7.249  
6.743  
6.724  
6.704

5.751  
5.619

4.194

2.914

2.050

0.012

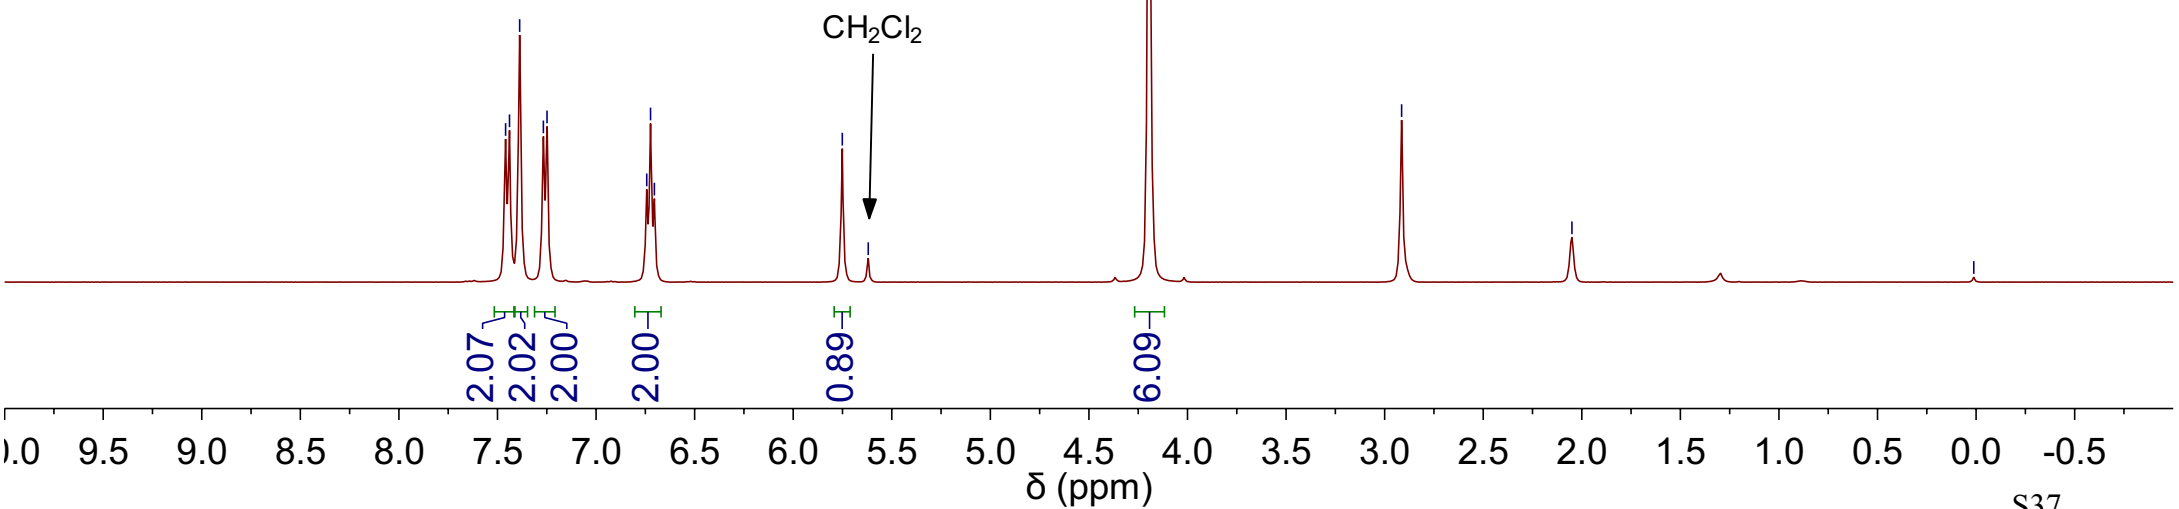

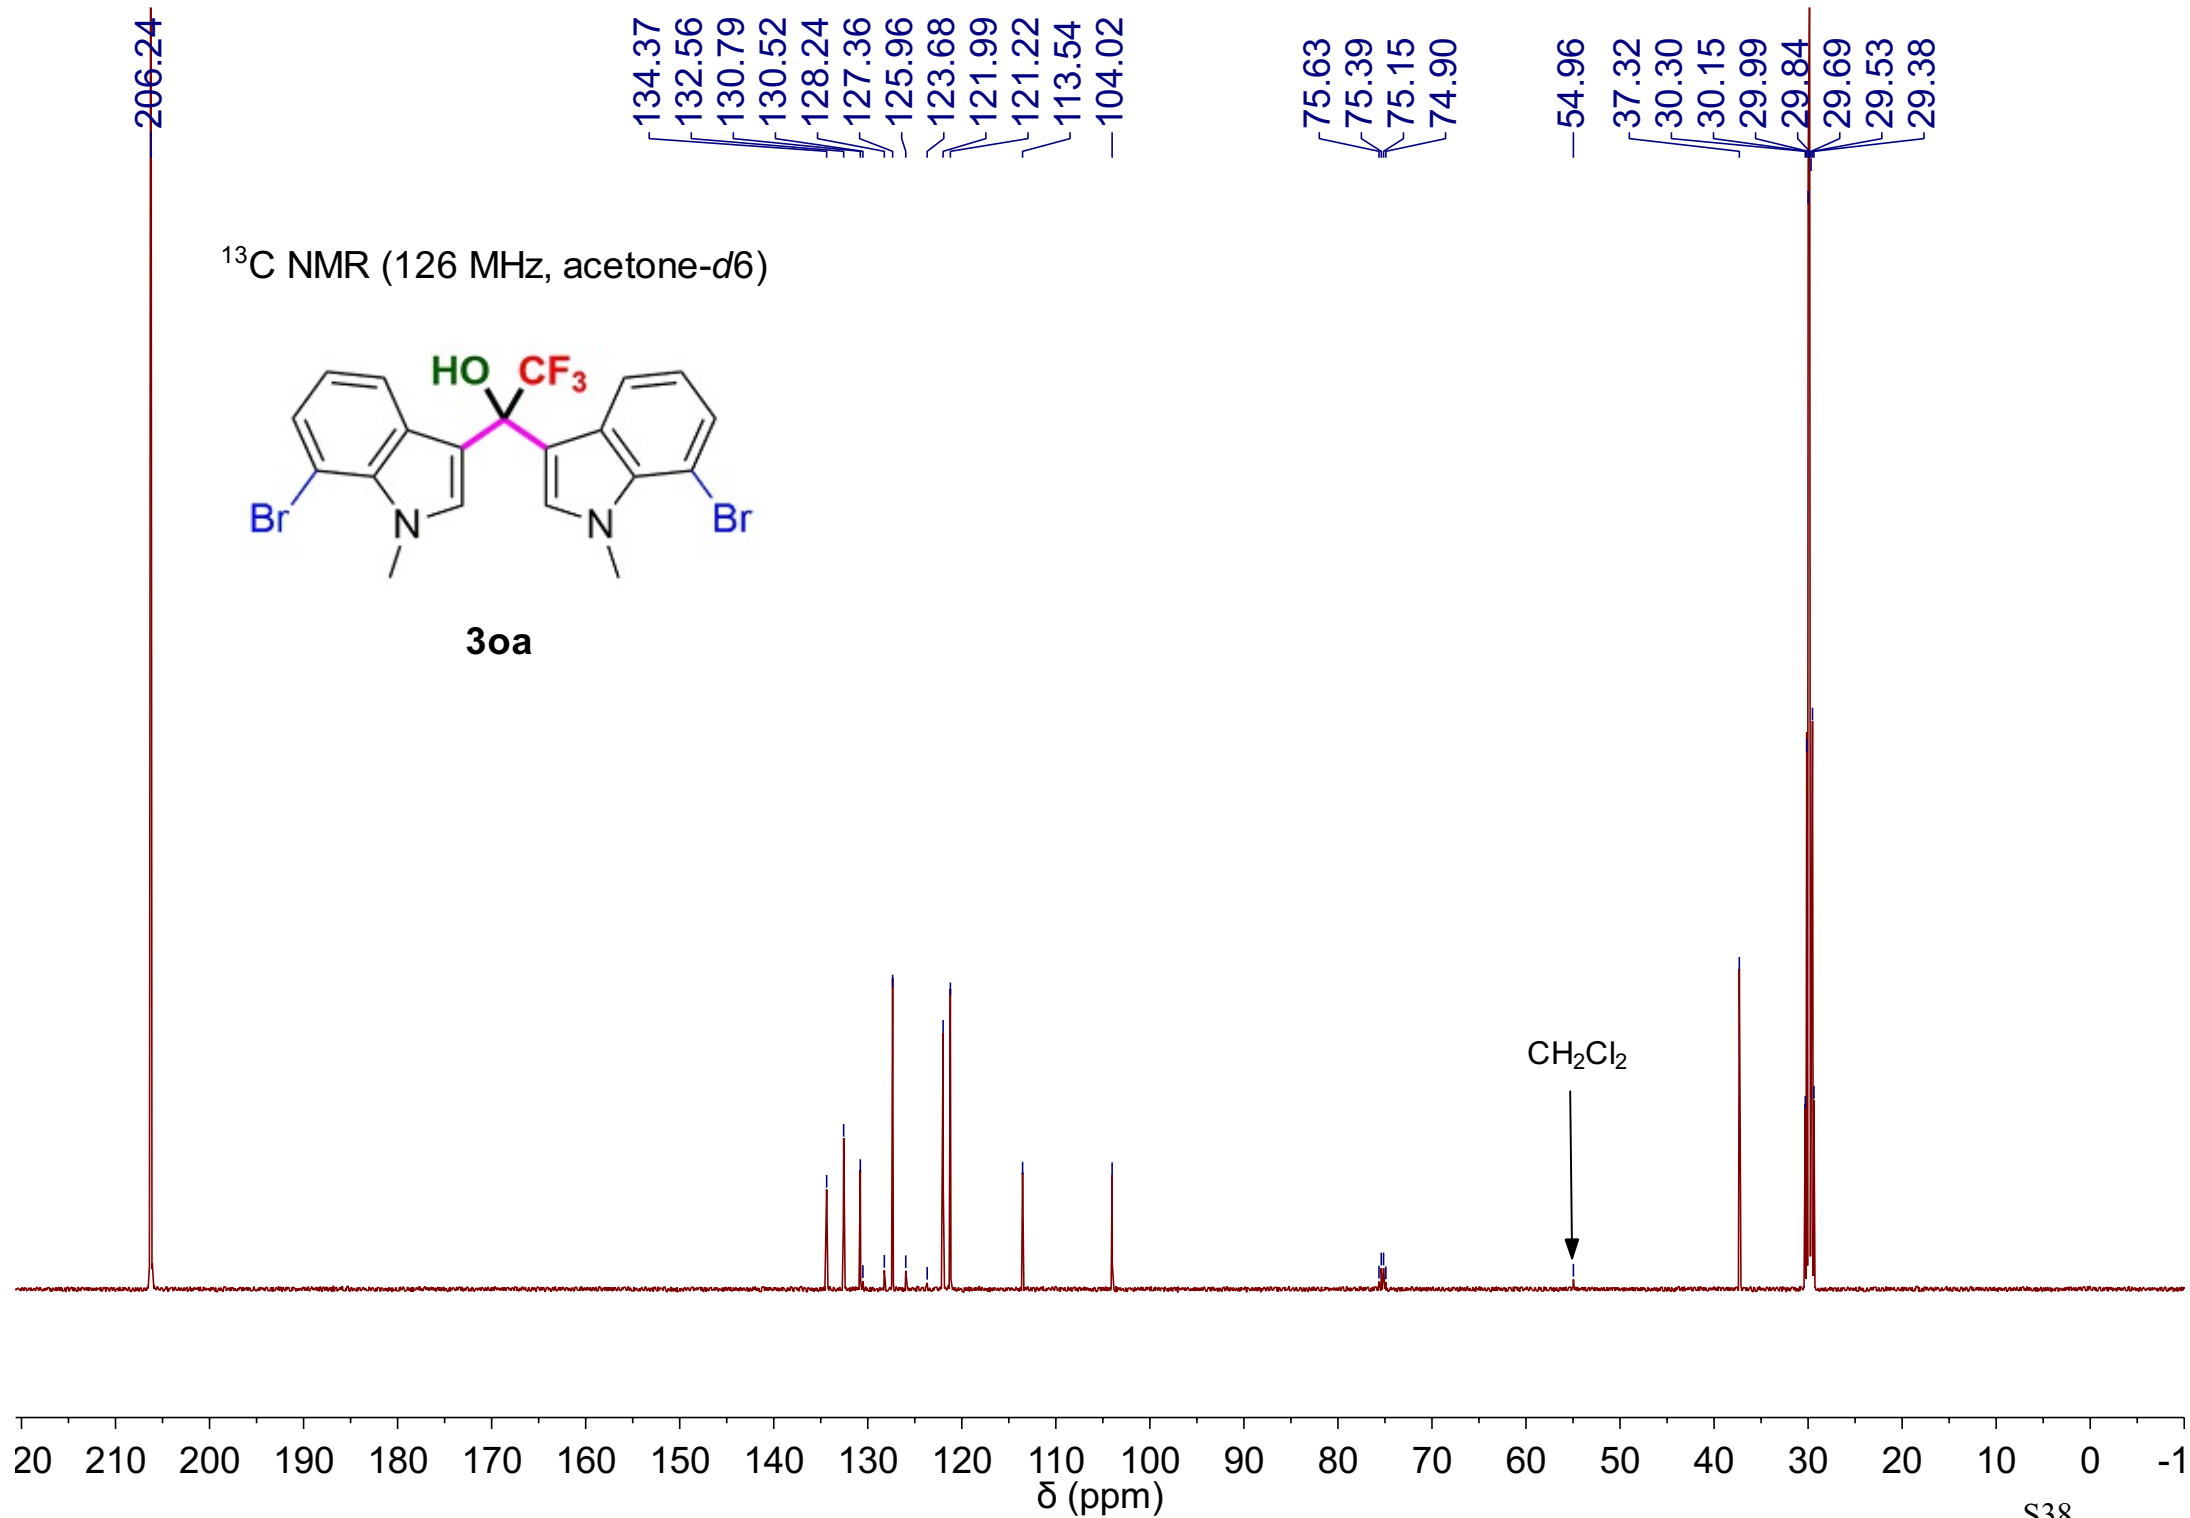

$^{19}\text{F}$  NMR (471 MHz, acetone- $d_6$ )

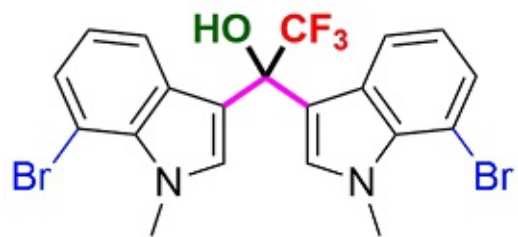

**30a**

---77.65

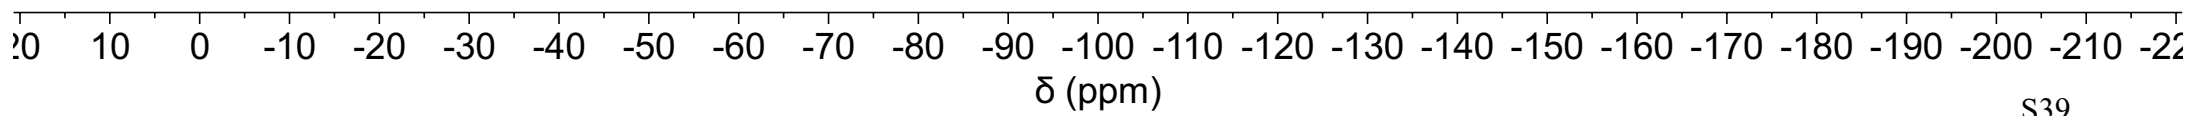



8.059  
7.590  
7.511  
7.507  
7.489  
7.486  
7.441  
7.419

3.956  
3.838

3.098

2.060  
2.055  
2.050  
2.044  
2.039

-0.015

<sup>1</sup>H NMR (400 MHz, acetone-*d*<sub>6</sub>)

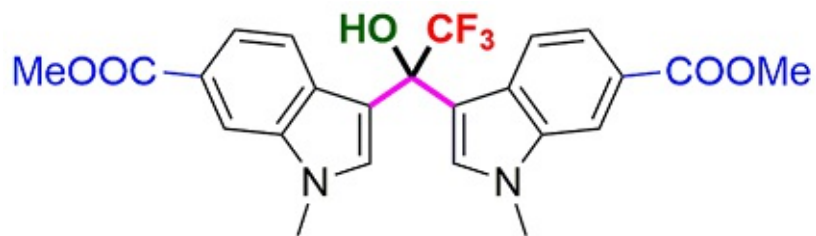

**3pa**

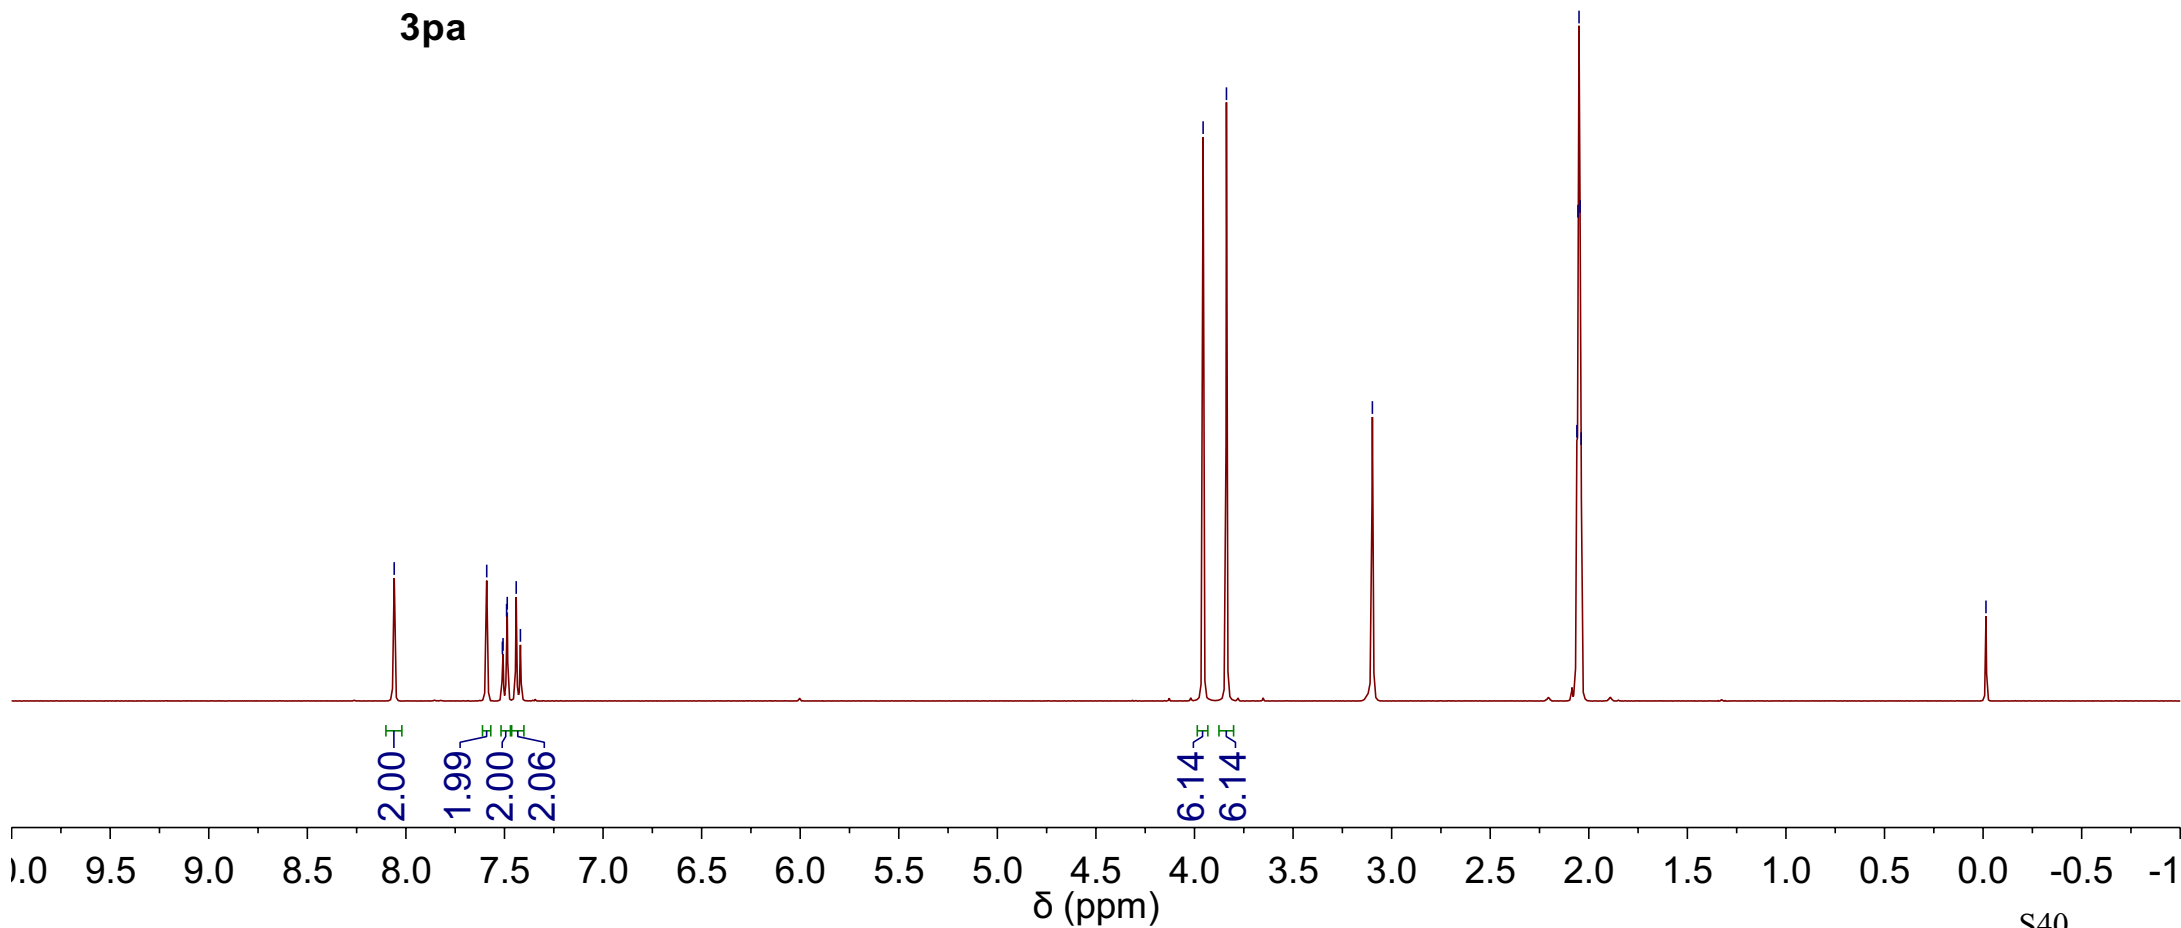

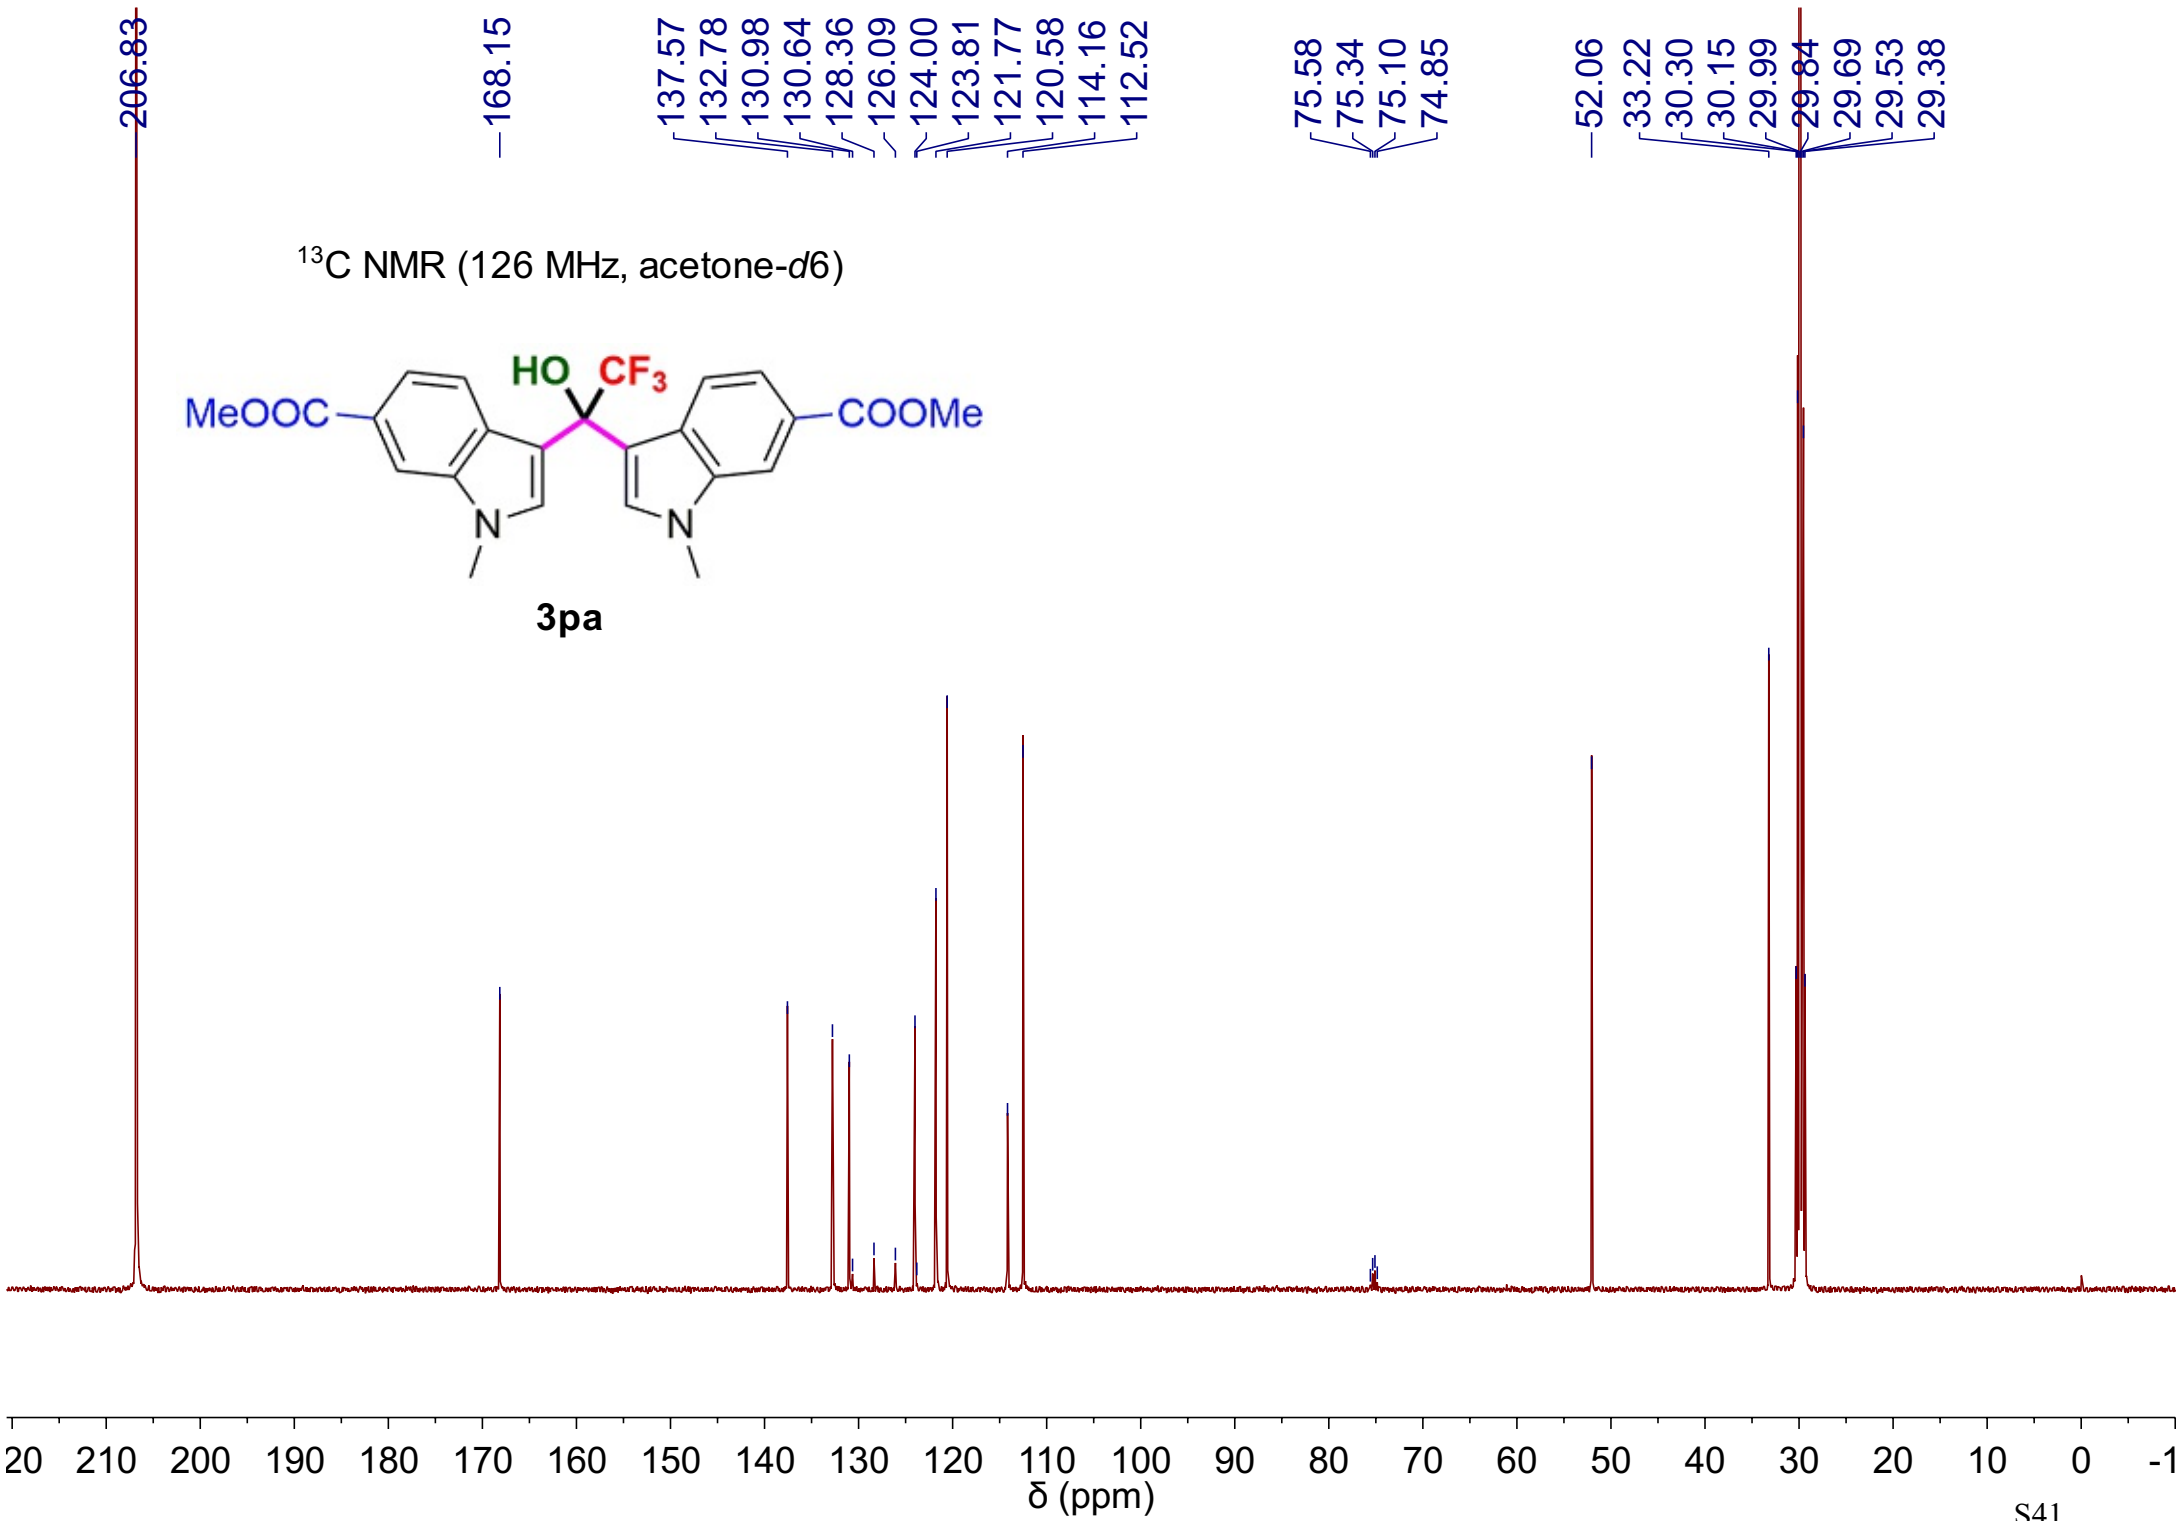

$^{19}\text{F}$  NMR (471 MHz, acetone- $d_6$ )

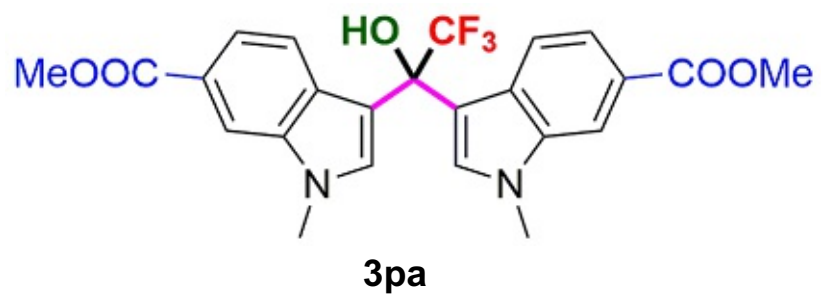

---77.60

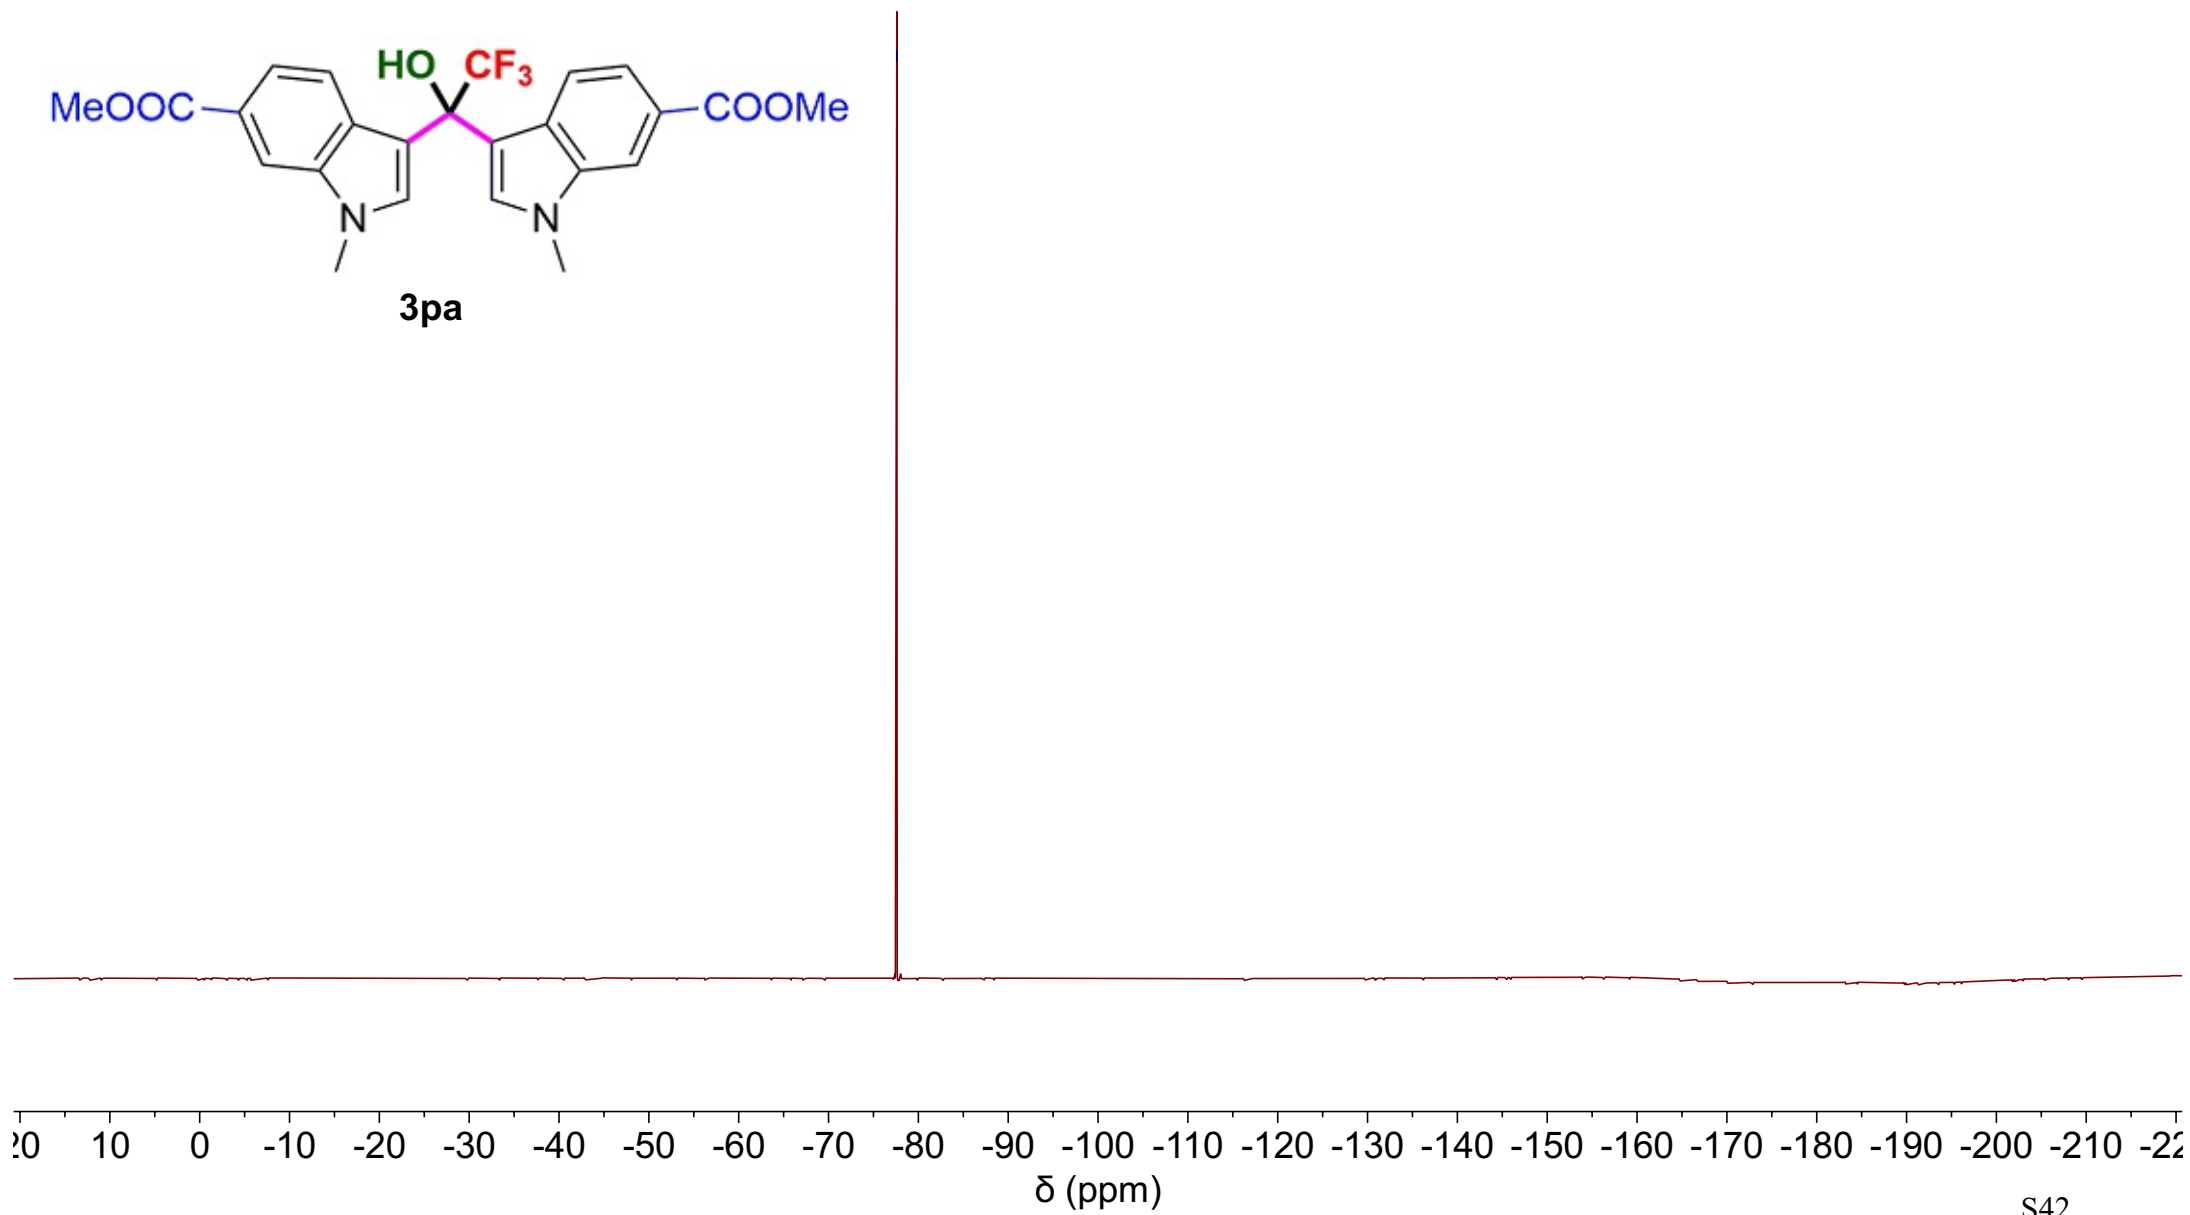

7.412  
7.393  
7.073  
7.056  
7.039  
6.826  
6.807  
6.790

-5.466

4.309  
4.293  
4.275  
4.258

-2.839

2.055  
2.050  
2.044  
1.442  
1.425  
1.407

-0.004

<sup>1</sup>H NMR (400 MHz, acetone-*d*<sub>6</sub>)

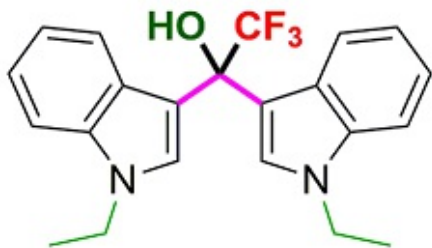

3qa

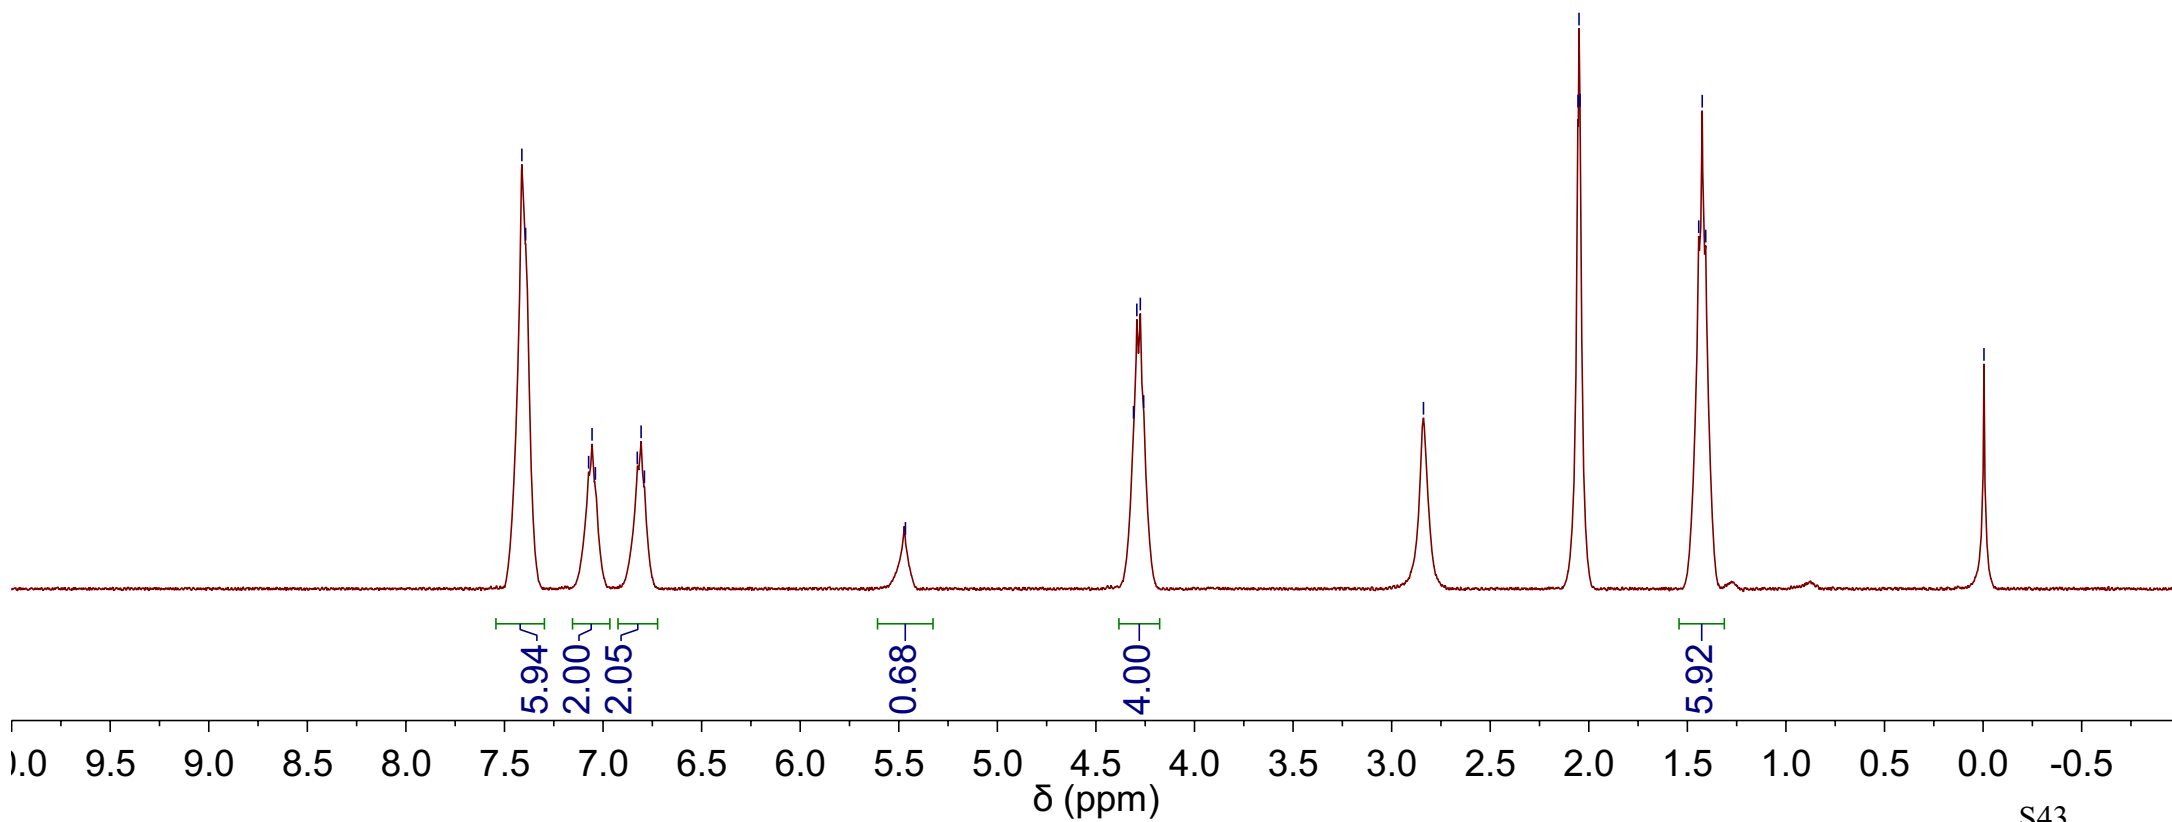

-206.29

137.25  
130.93  
128.65  
127.82  
127.61  
127.60  
126.37  
124.09  
122.48  
122.07  
119.65  
114.13  
110.24

76.04  
75.80  
75.56  
75.32

41.48  
30.30  
30.15  
29.99  
29.84  
29.69  
29.53  
29.38  
-15.90

<sup>13</sup>C NMR (126 MHz, acetone-d<sub>6</sub>)

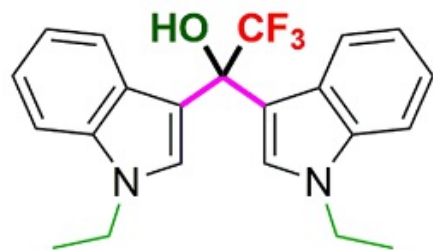

3qa

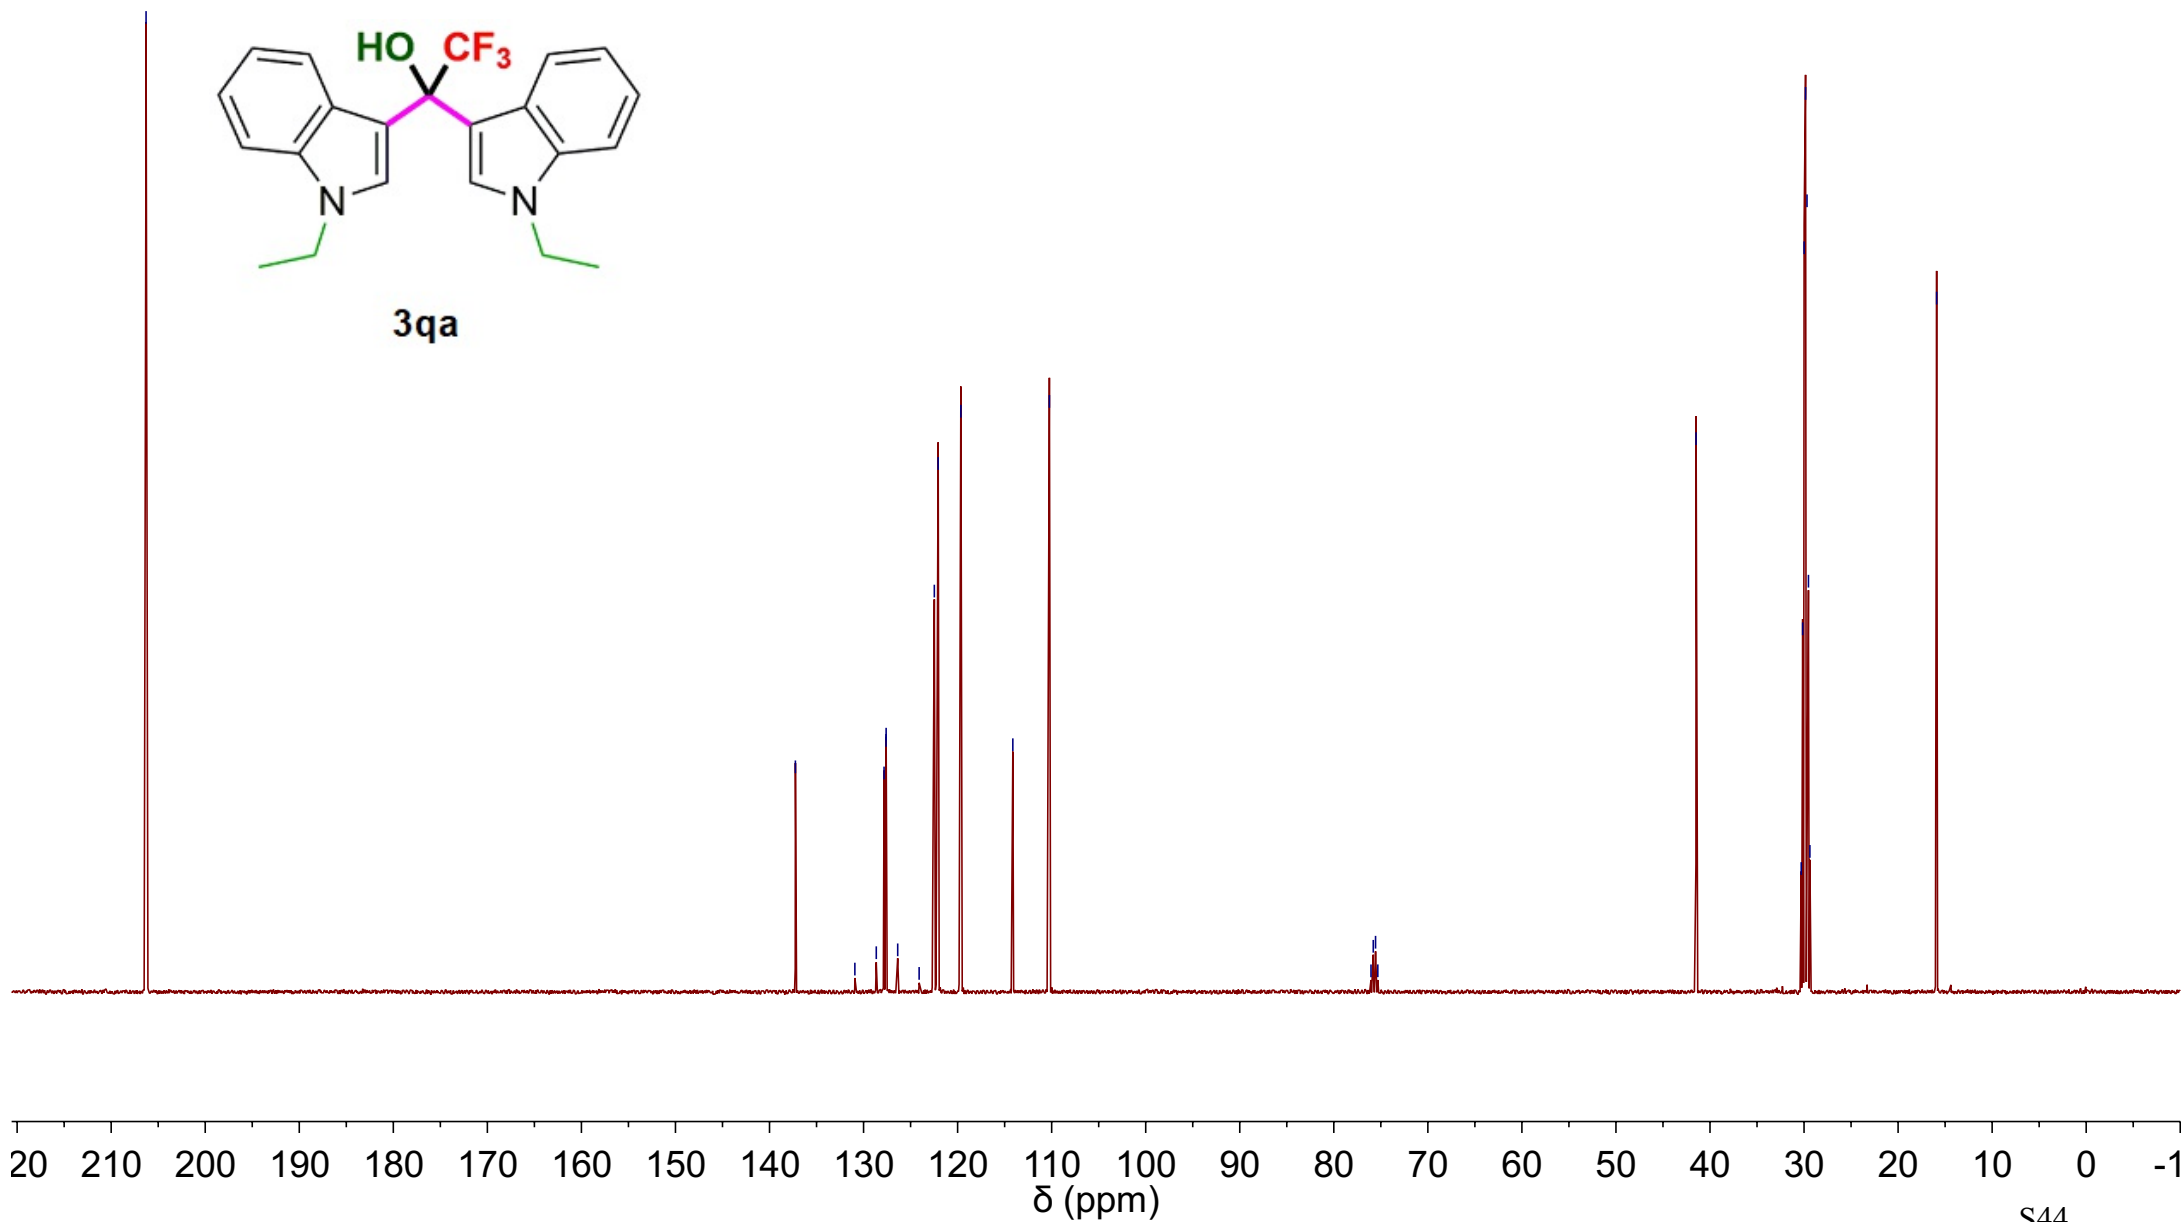

$^{19}\text{F}$  NMR (471 MHz, acetone- $d_6$ )

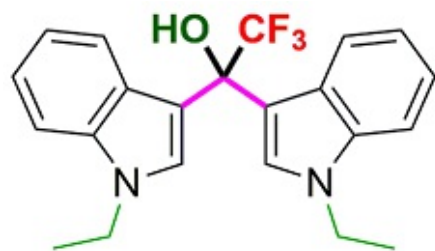

**3qa**

---77.30

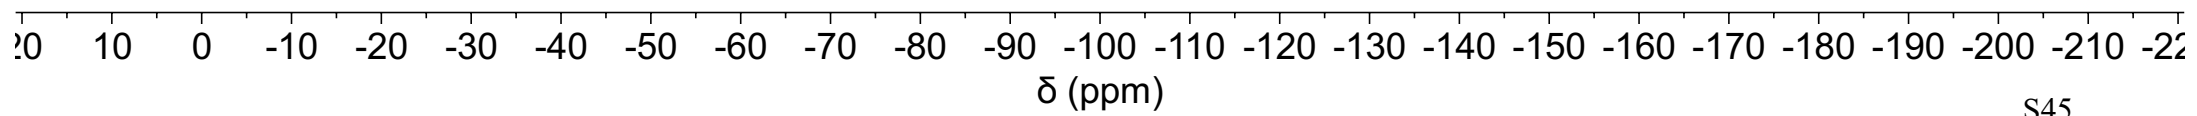

7.419  
7.402  
7.360  
7.339  
7.069  
7.049  
7.031  
6.833  
6.815  
6.797  
6.106  
6.094  
6.081  
6.068  
6.051  
6.038  
6.025  
6.013  
5.567  
5.172  
5.169  
5.147  
5.143  
5.067  
5.063  
5.024  
5.021  
4.895  
4.891  
4.886  
4.883  
2.844  
2.811  
2.055  
2.050  
2.045  
-0.003

<sup>1</sup>H NMR (400 MHz, acetone-*d*<sub>6</sub>)

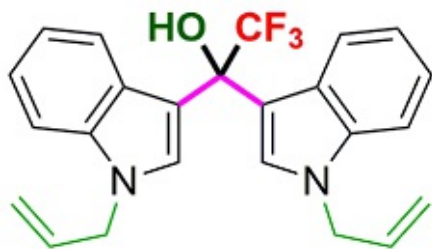

3ra

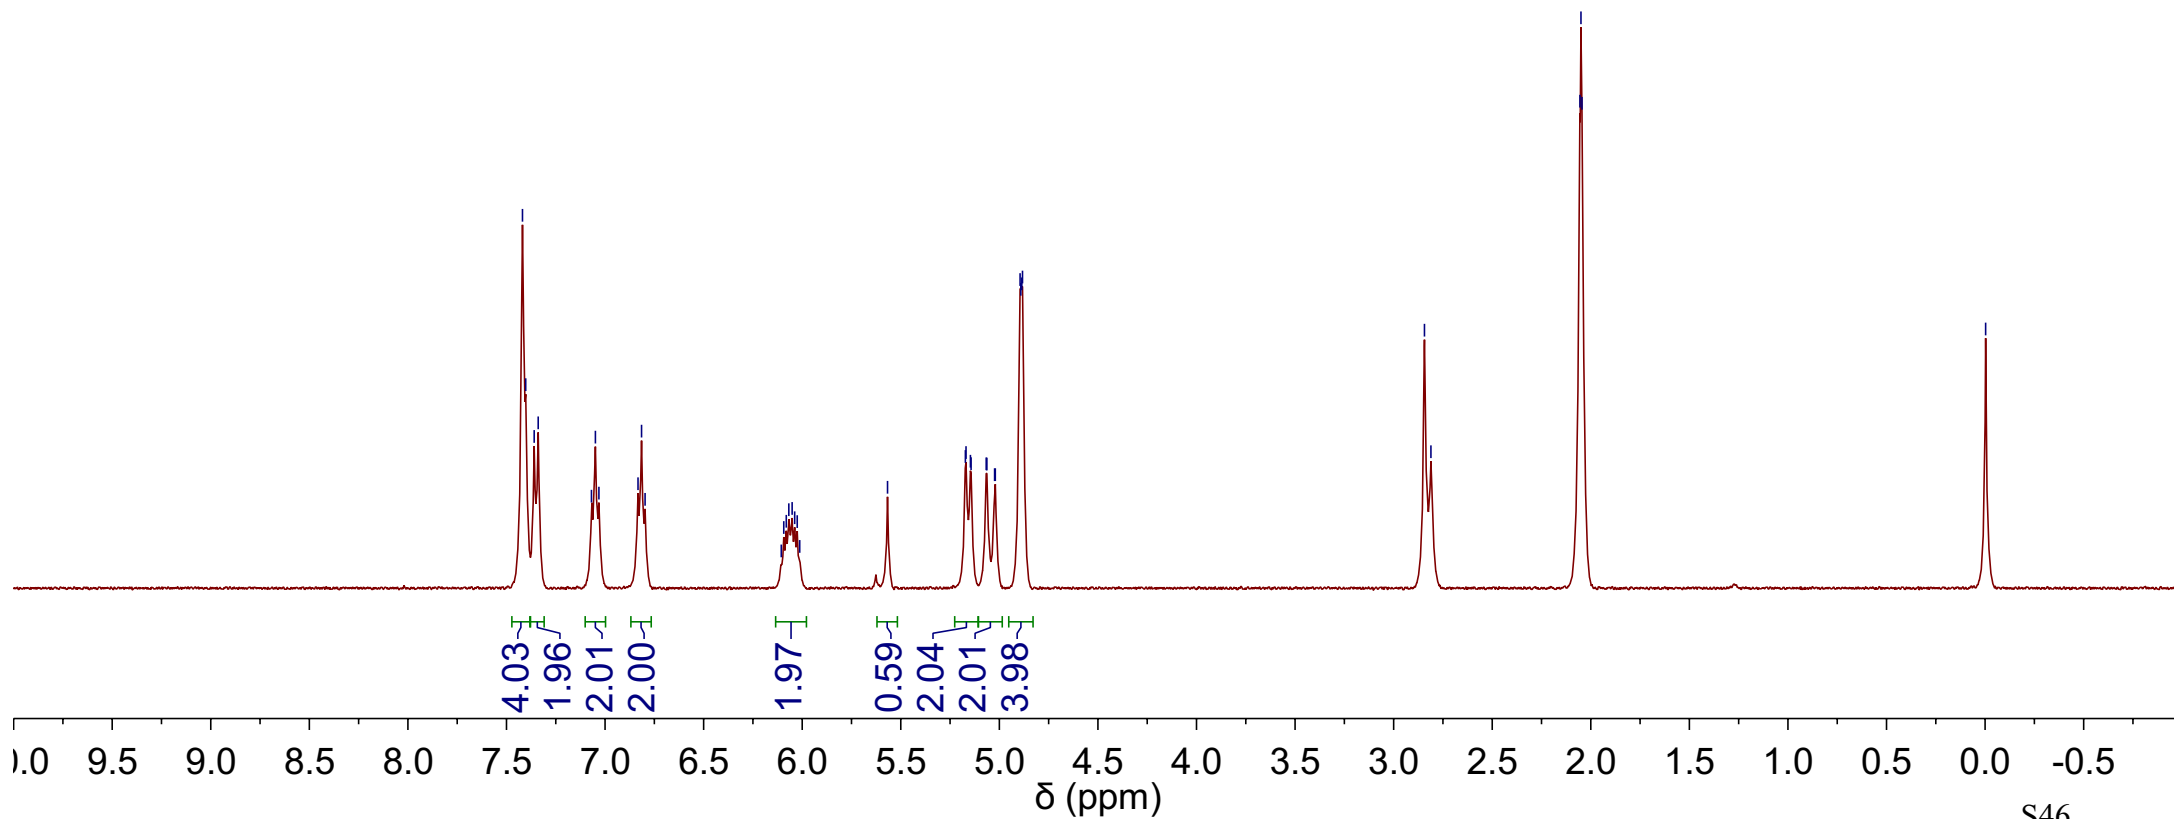

-206.30

137.64  
135.04  
130.85  
128.57  
128.29  
128.28  
127.73  
126.29  
124.01  
122.36  
122.22  
119.82  
116.92  
114.33  
110.62

75.94  
75.70  
75.46  
75.21

-49.08  
30.30  
30.15  
29.99  
29.84  
29.69  
29.53  
29.38

$^{13}\text{C}$  NMR (126 MHz, acetone- $d_6$ )

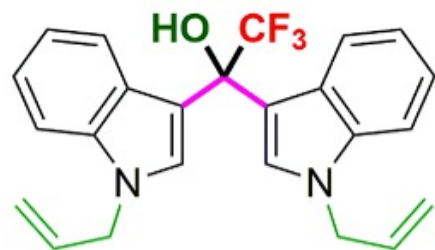

3ra

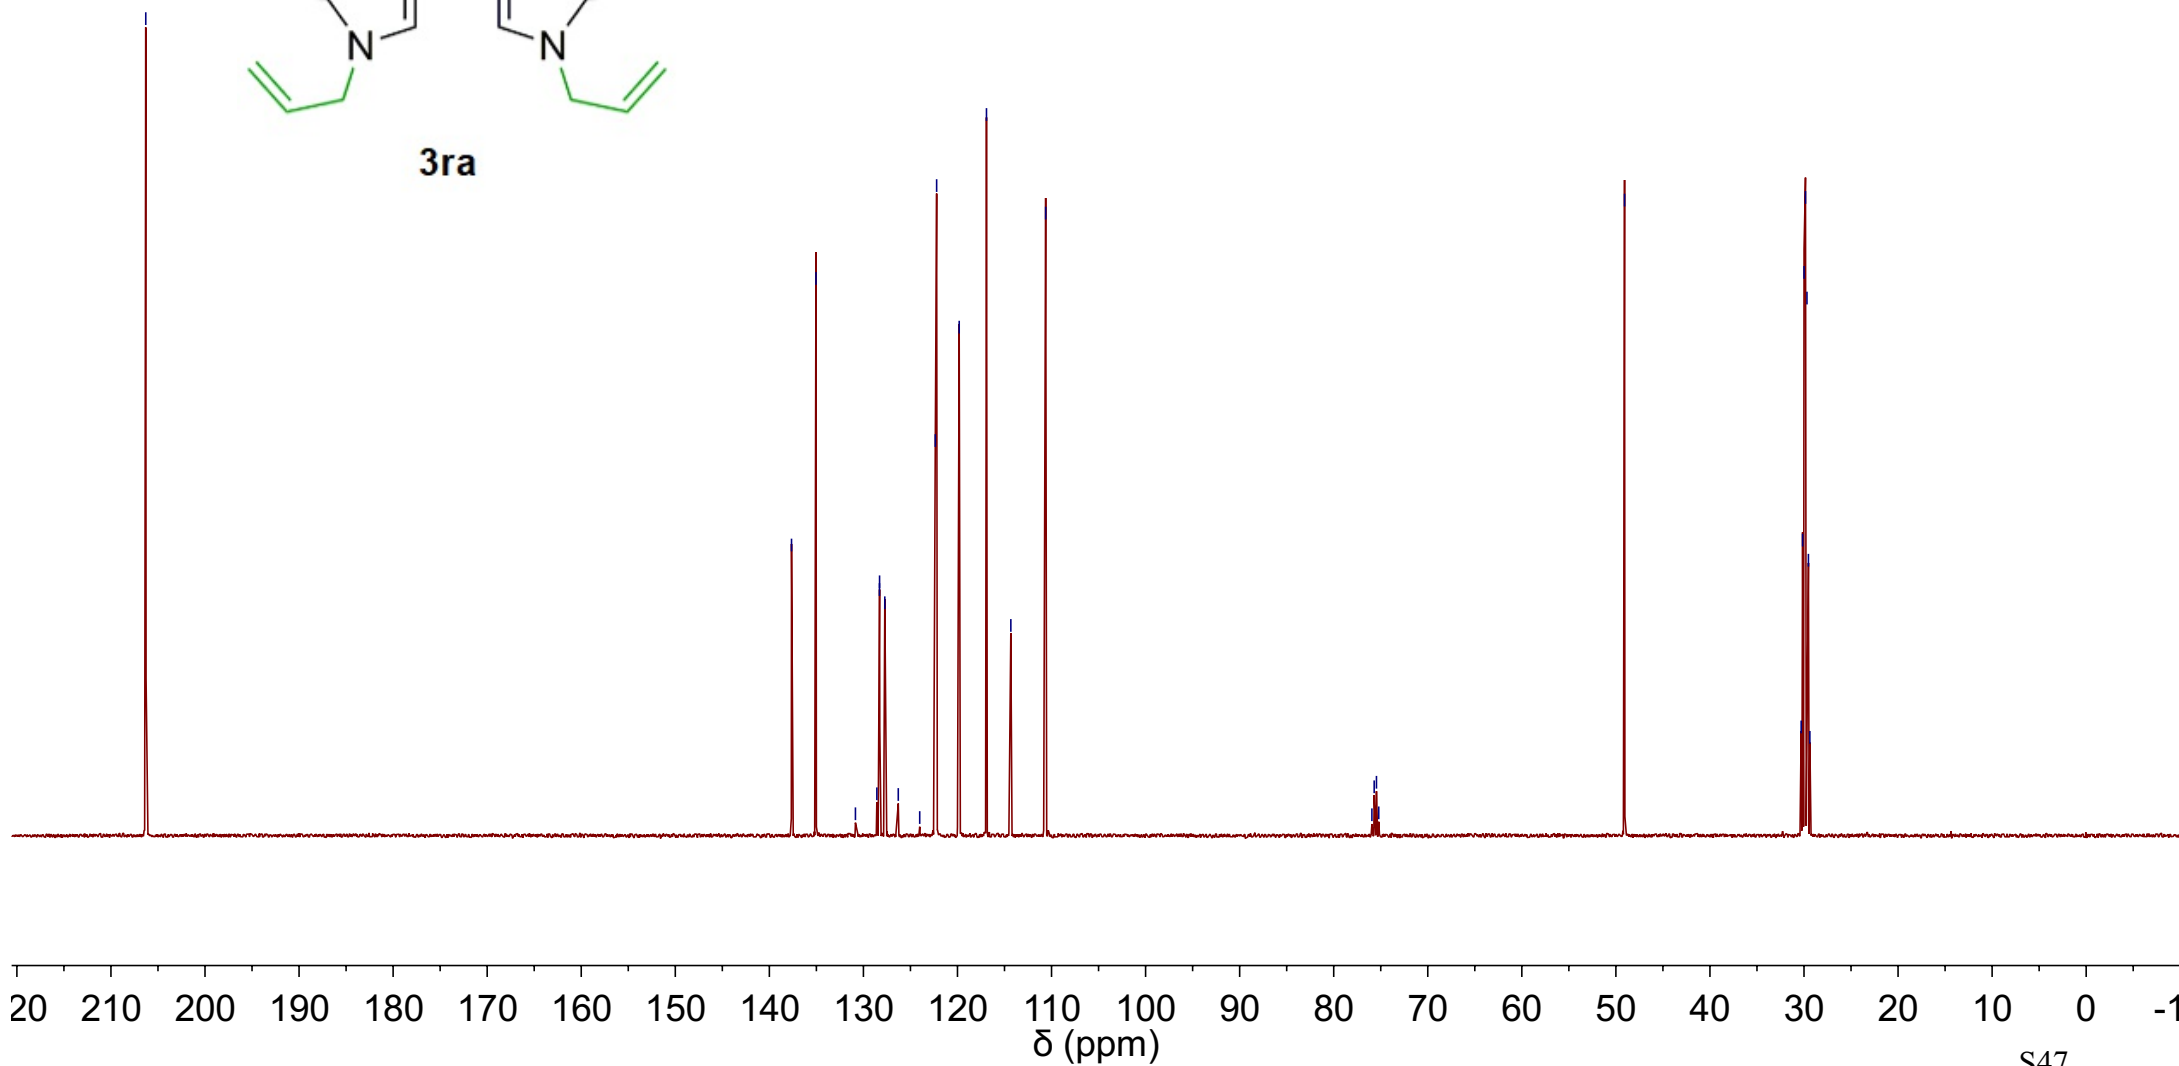



$^{19}\text{F}$  NMR (471 MHz, acetone- $d_6$ )

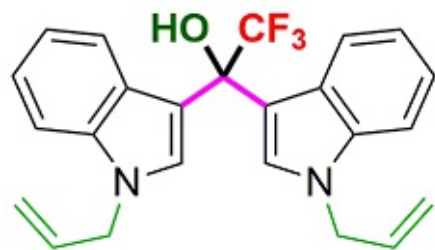

3ra

--77.33

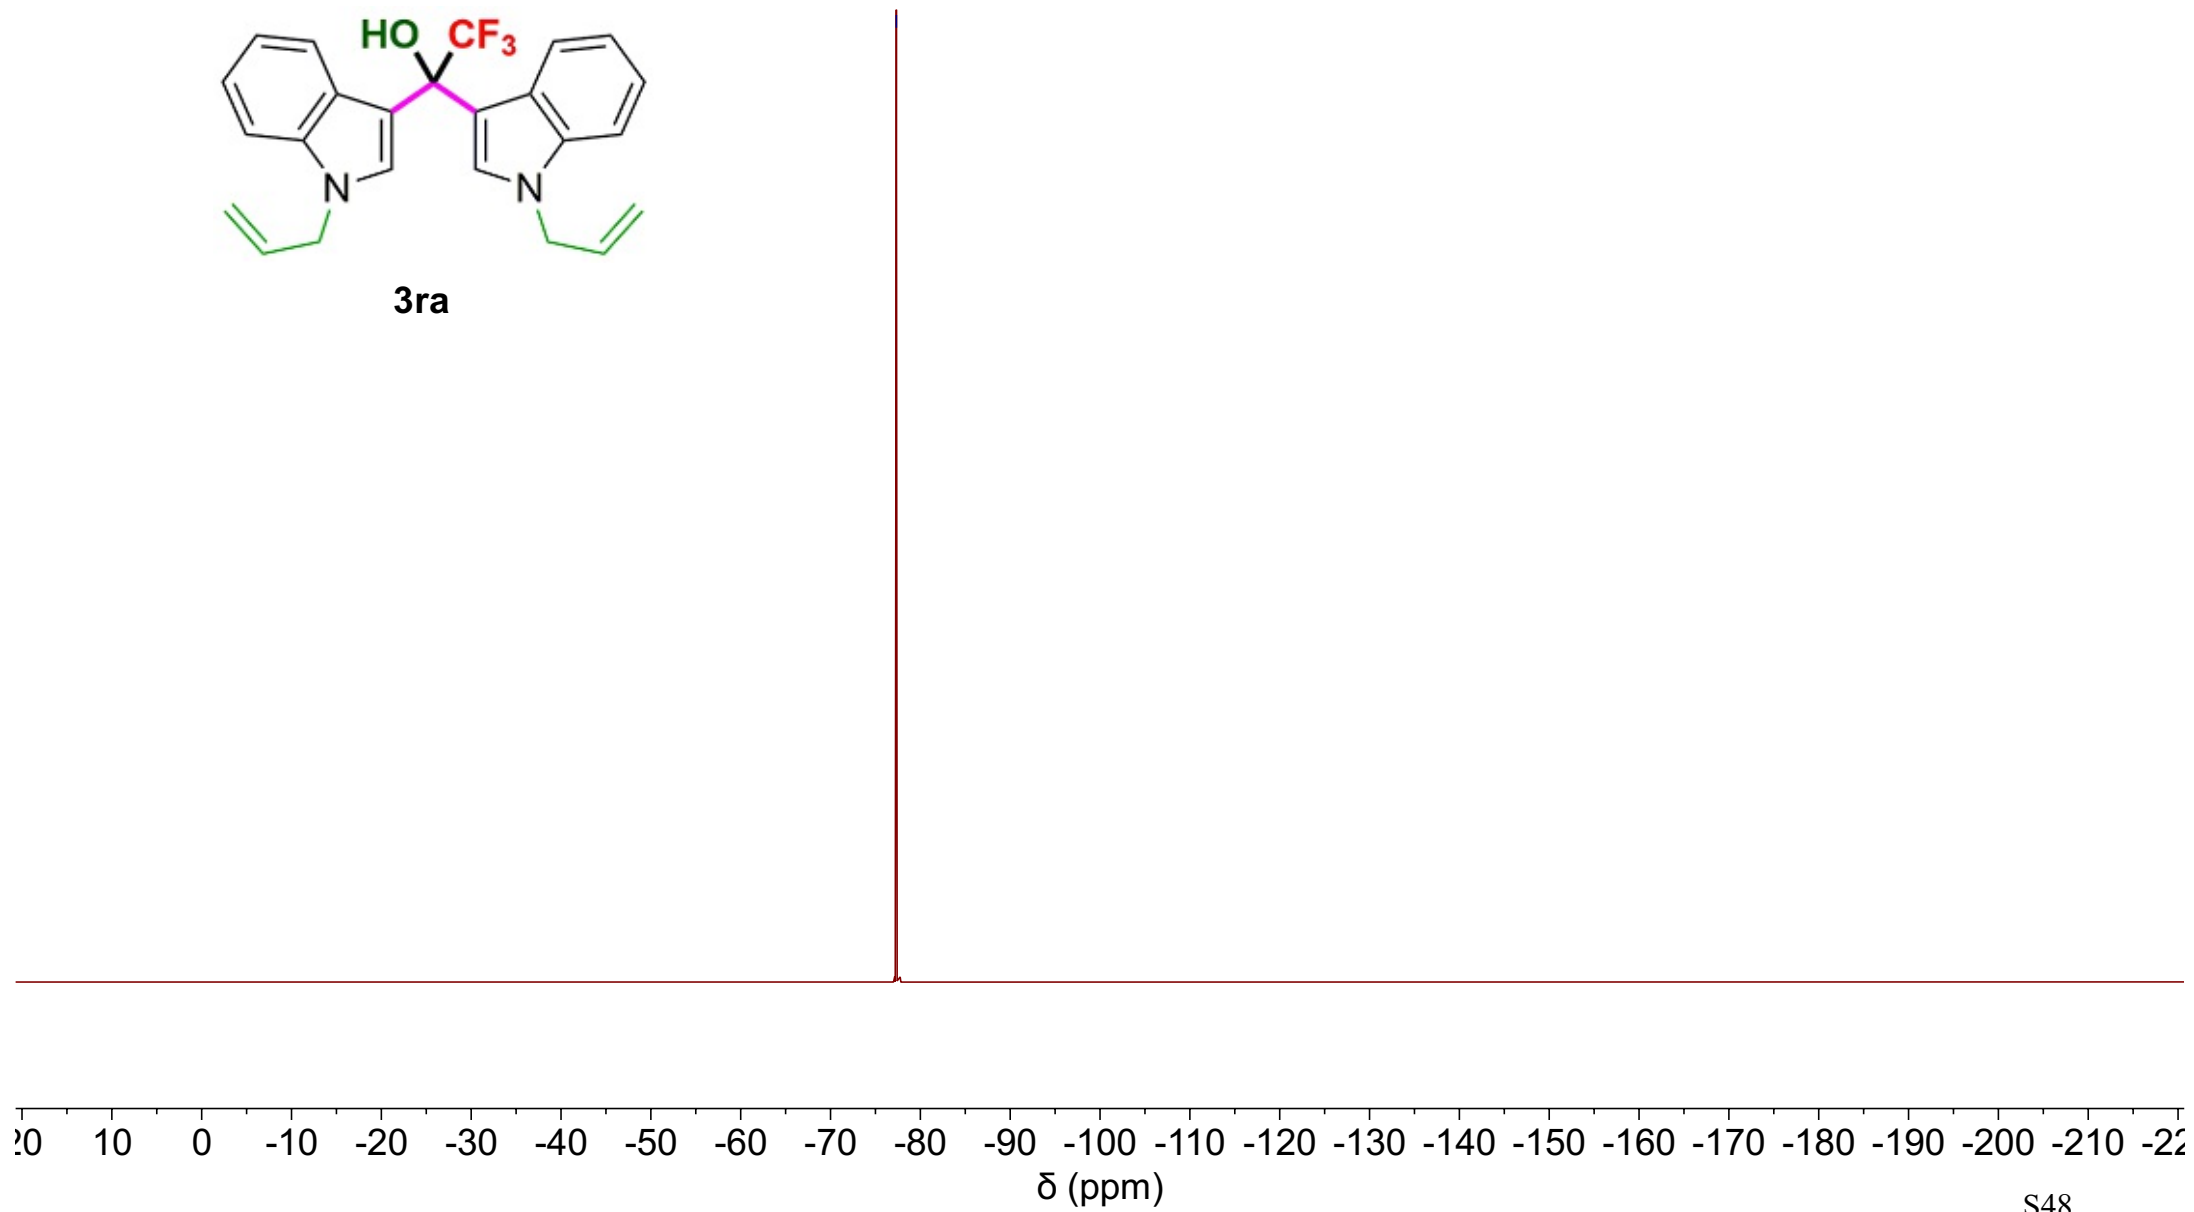

7.517  
7.488  
7.468  
7.452  
7.432  
7.133  
7.115  
7.097  
6.882  
6.863  
6.845

-5.667

5.130  
5.125

2.981  
2.975  
2.971  
2.841  
2.810  
2.055  
2.050  
2.045

-0.003

<sup>1</sup>H NMR (400 MHz, acetone-*d*<sub>6</sub>)

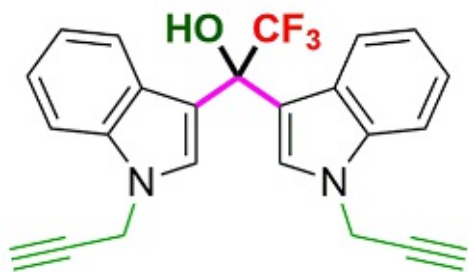

3sa

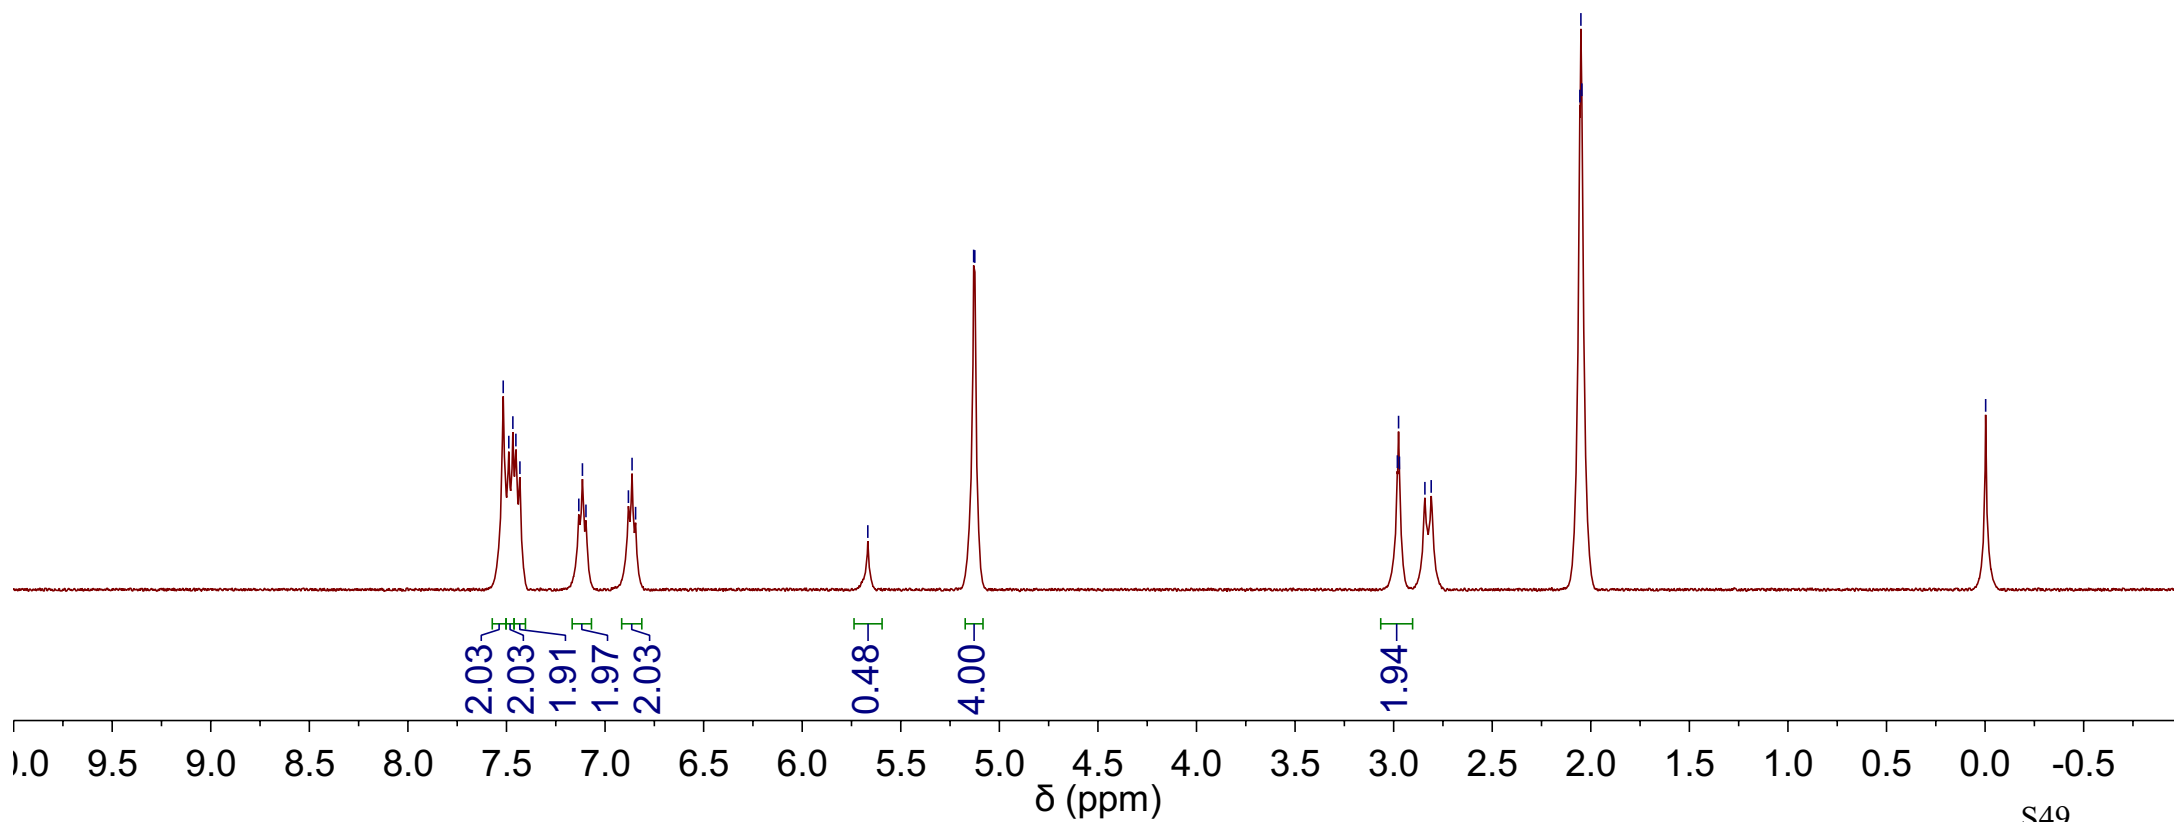

-206.39

137.37  
130.73  
128.45  
127.90  
127.83  
126.18  
123.90  
122.51  
122.46  
120.28  
114.71  
110.58

79.27  
75.91  
75.67  
75.43  
75.18  
74.81

36.12  
30.30  
30.15  
29.99  
29.84  
29.69  
29.53  
29.38

$^{13}\text{C}$  NMR (126 MHz, acetone- $d_6$ )

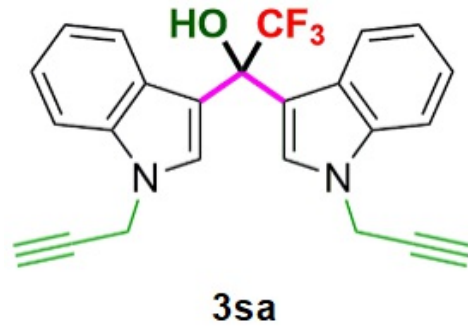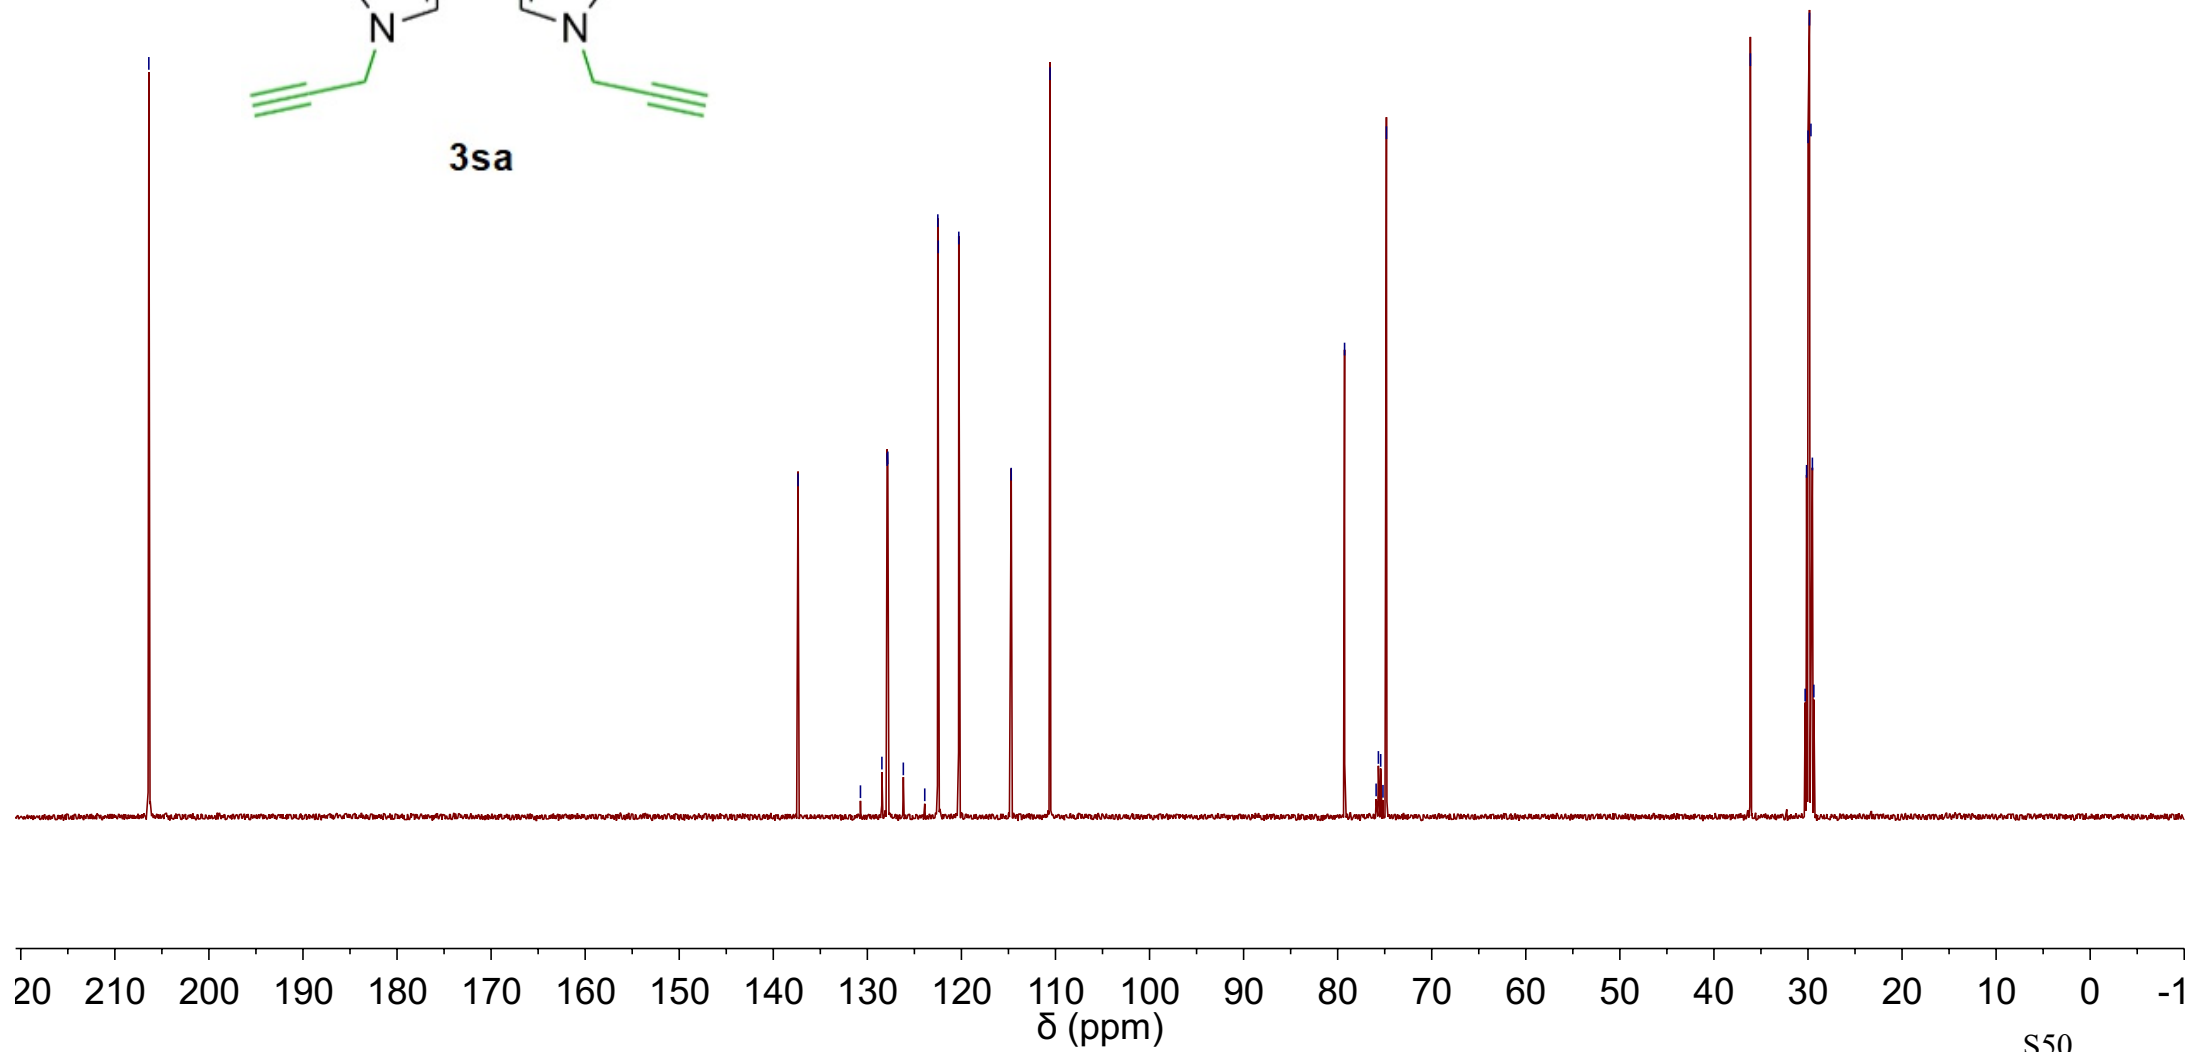

$^{19}\text{F}$  NMR (471 MHz, acetone- $d_6$ )

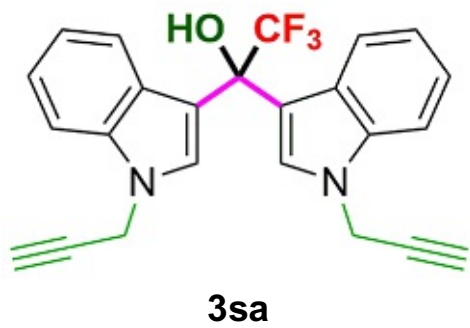

--77.39

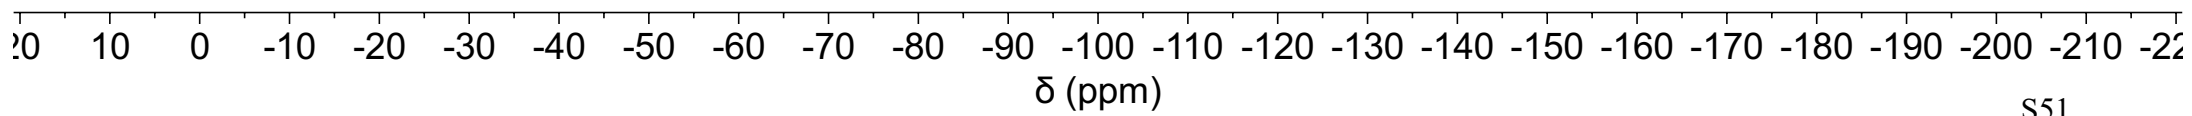

7.692  
7.661  
7.641  
7.618  
7.610  
7.540  
7.520  
7.450  
7.445  
7.442  
7.439  
7.431  
7.429  
7.164  
7.146  
7.126  
6.993  
6.974  
6.956

-2.846

-2.050

-0.004

<sup>1</sup>H NMR (400 MHz, acetone-*d*<sub>6</sub>)

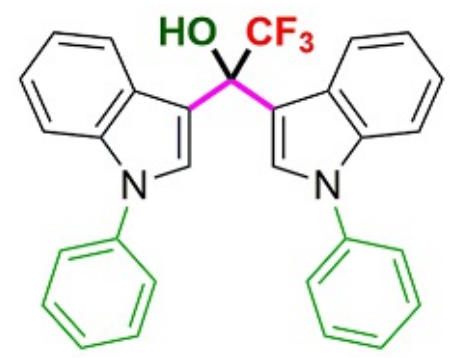

**3ta**

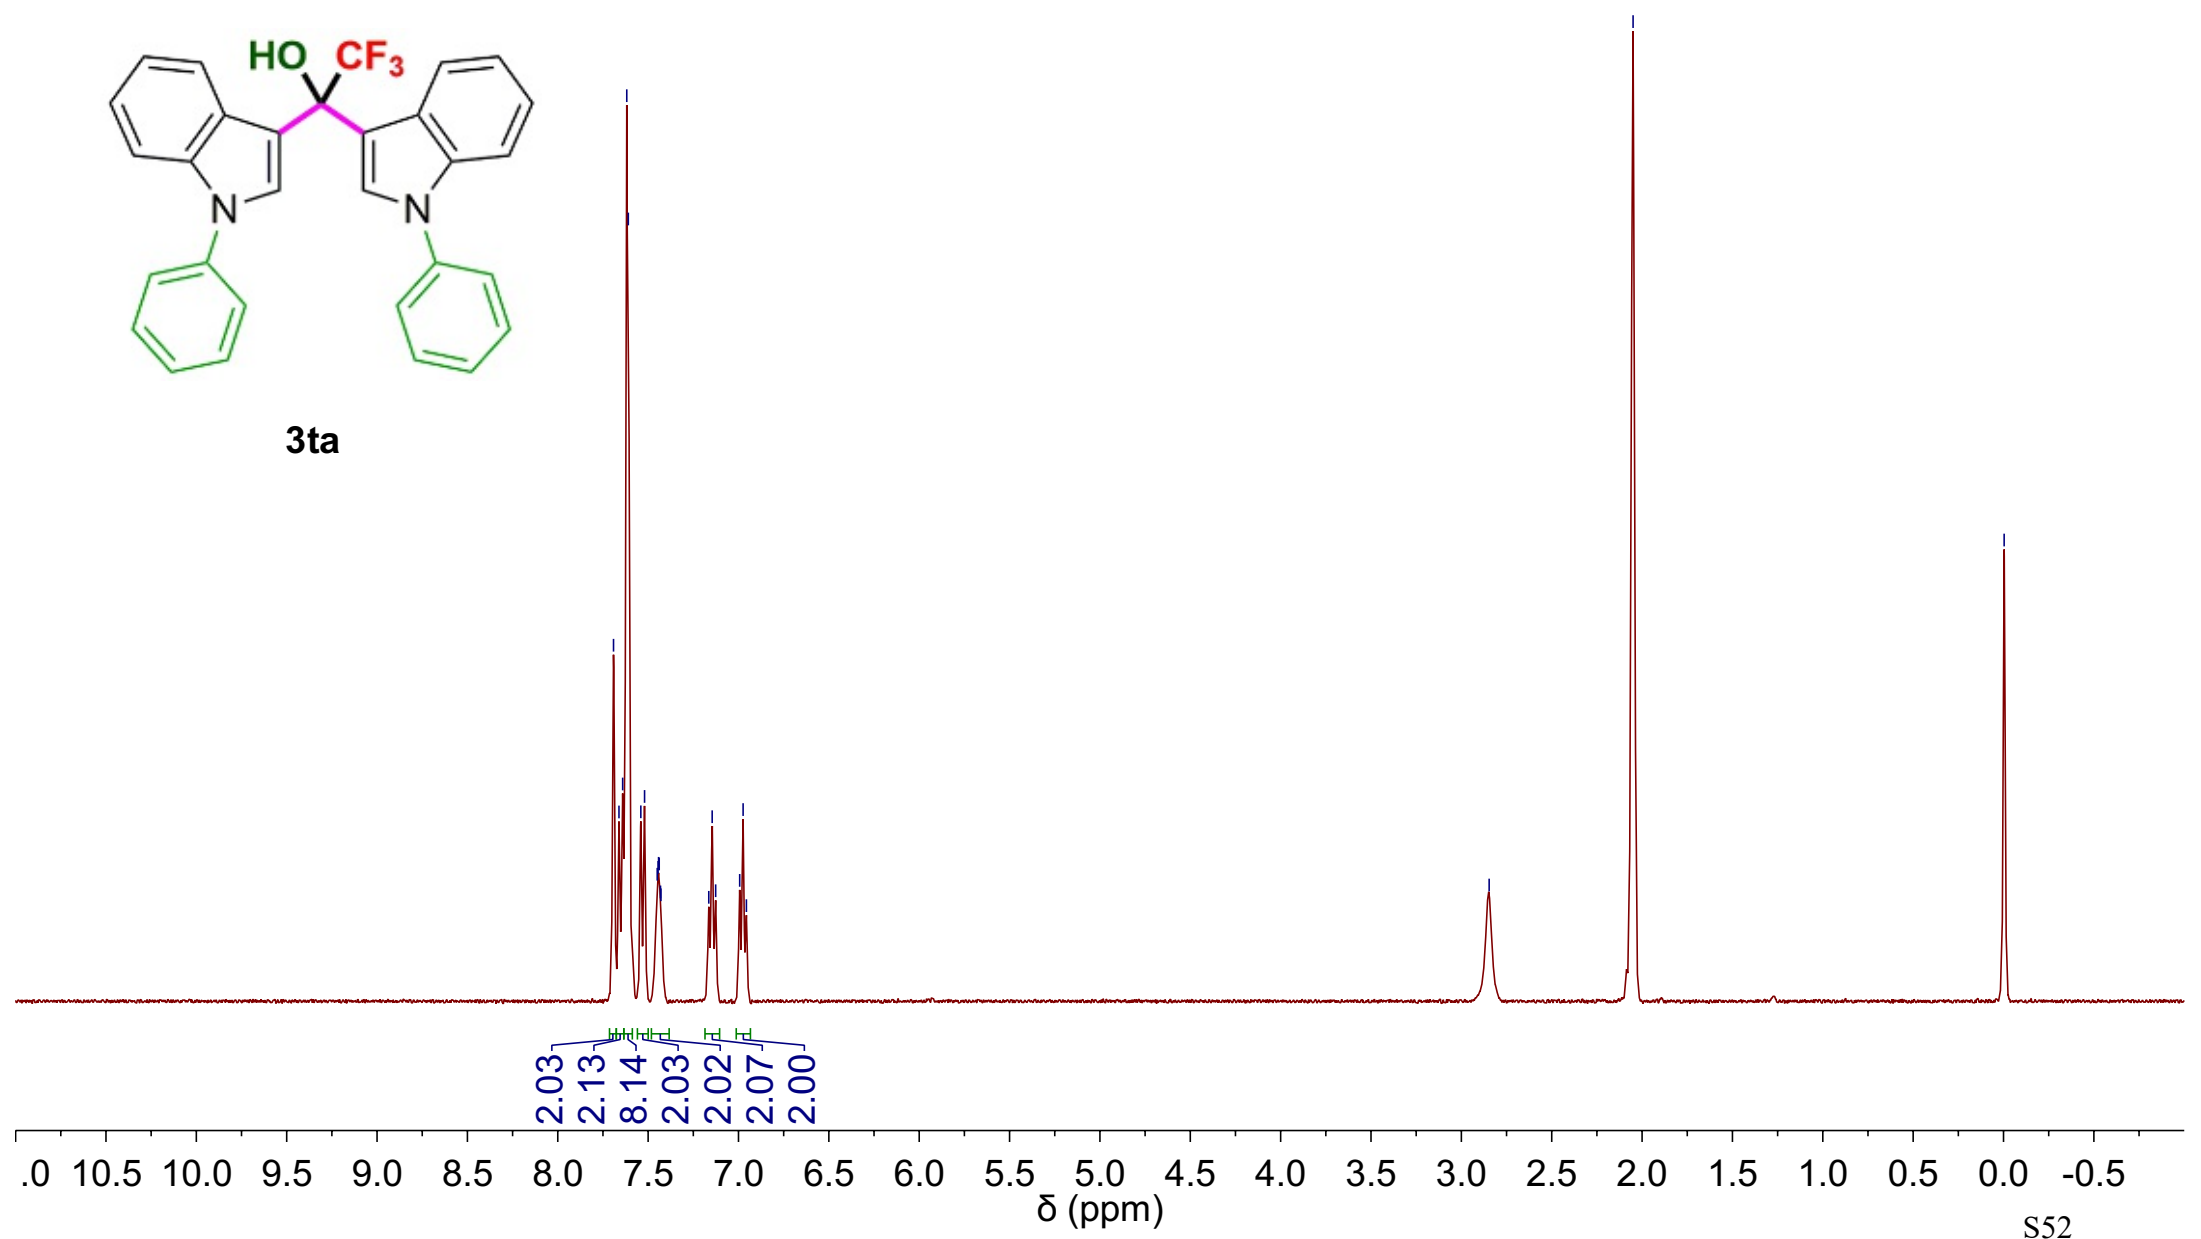

-206.24

140.15  
137.32  
130.70  
128.45  
128.38  
128.07  
127.70  
126.17  
125.22  
123.90  
123.41  
122.83  
121.12  
116.47  
111.21

76.10  
75.86  
75.61  
75.37

30.30  
30.15  
29.99  
29.84  
29.69  
29.53  
29.38

<sup>13</sup>C NMR (126 MHz, acetone-d<sub>6</sub>)

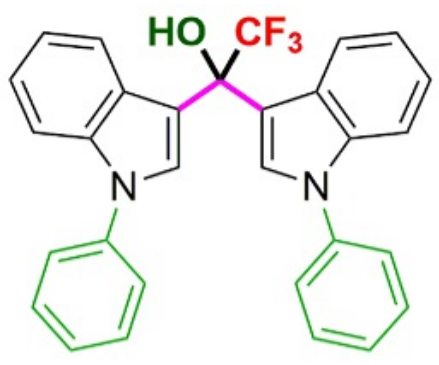

3ta

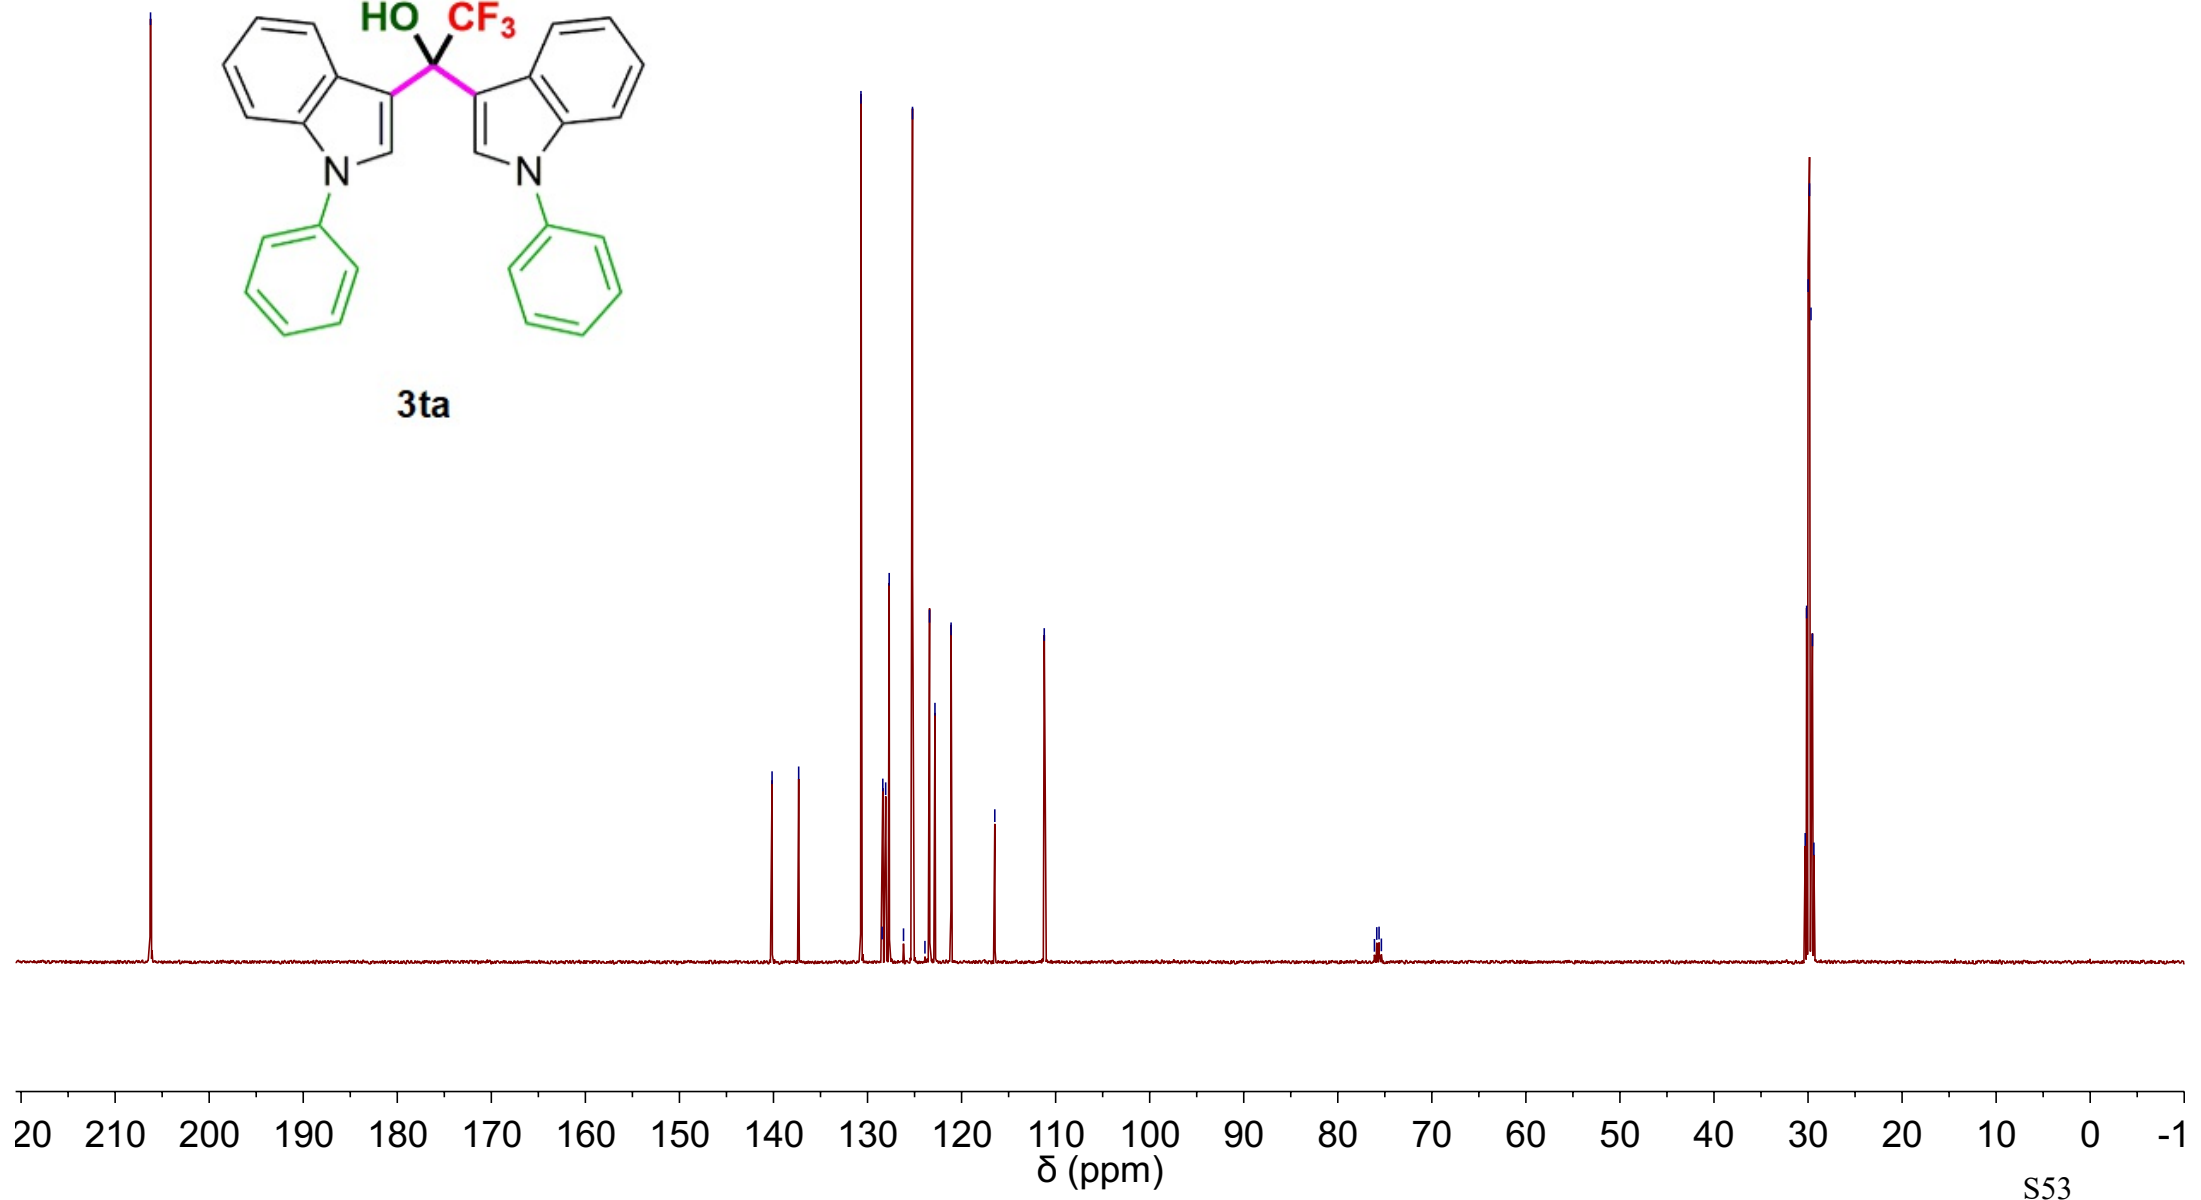

$^{19}\text{F}$  NMR (471 MHz, acetone- $d_6$ )

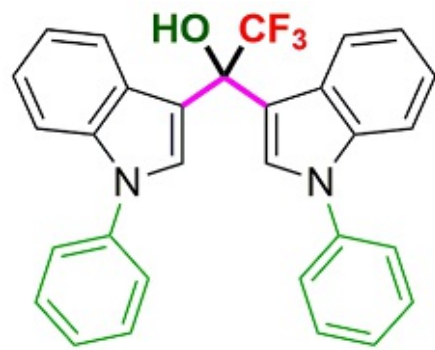

**3ta**

--77.21

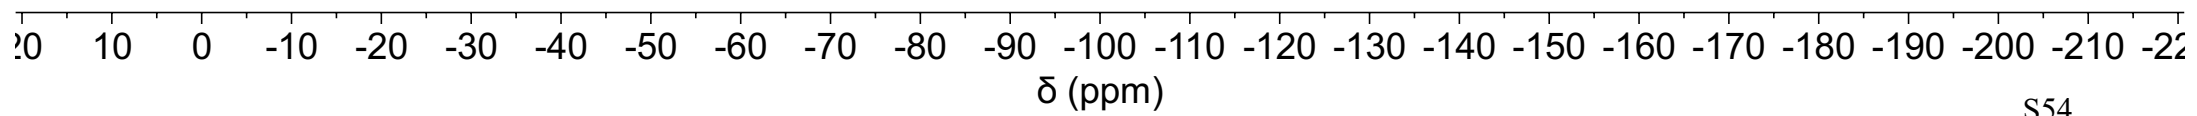

7.598  
7.445  
7.424  
7.343  
7.323  
7.314  
7.295  
7.273  
7.255  
7.237  
7.208  
7.190  
7.033  
7.013  
6.994  
6.846  
6.826  
6.808  
~5.653  
~5.510

2.843  
2.809  
2.061  
2.056  
2.050  
2.045  
2.040

—0.003

<sup>1</sup>H NMR (400 MHz, acetone-d<sub>6</sub>)

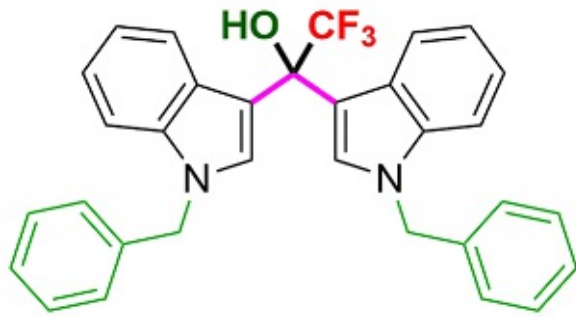

**3ua**

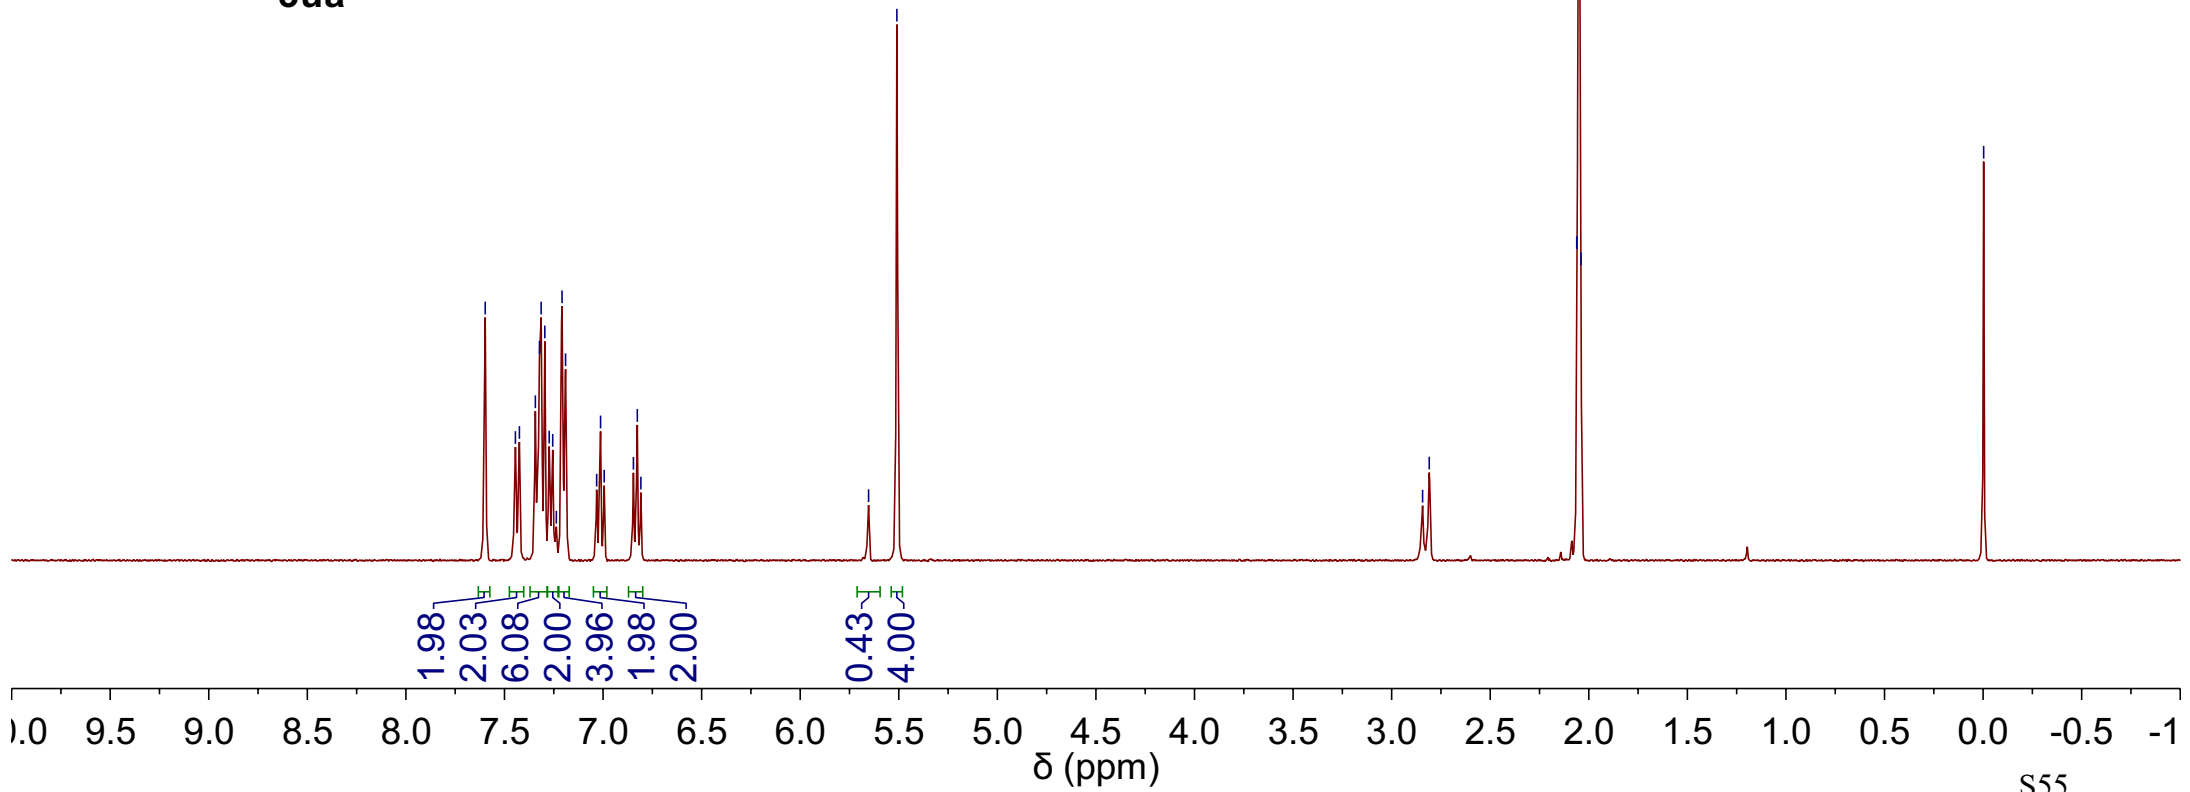



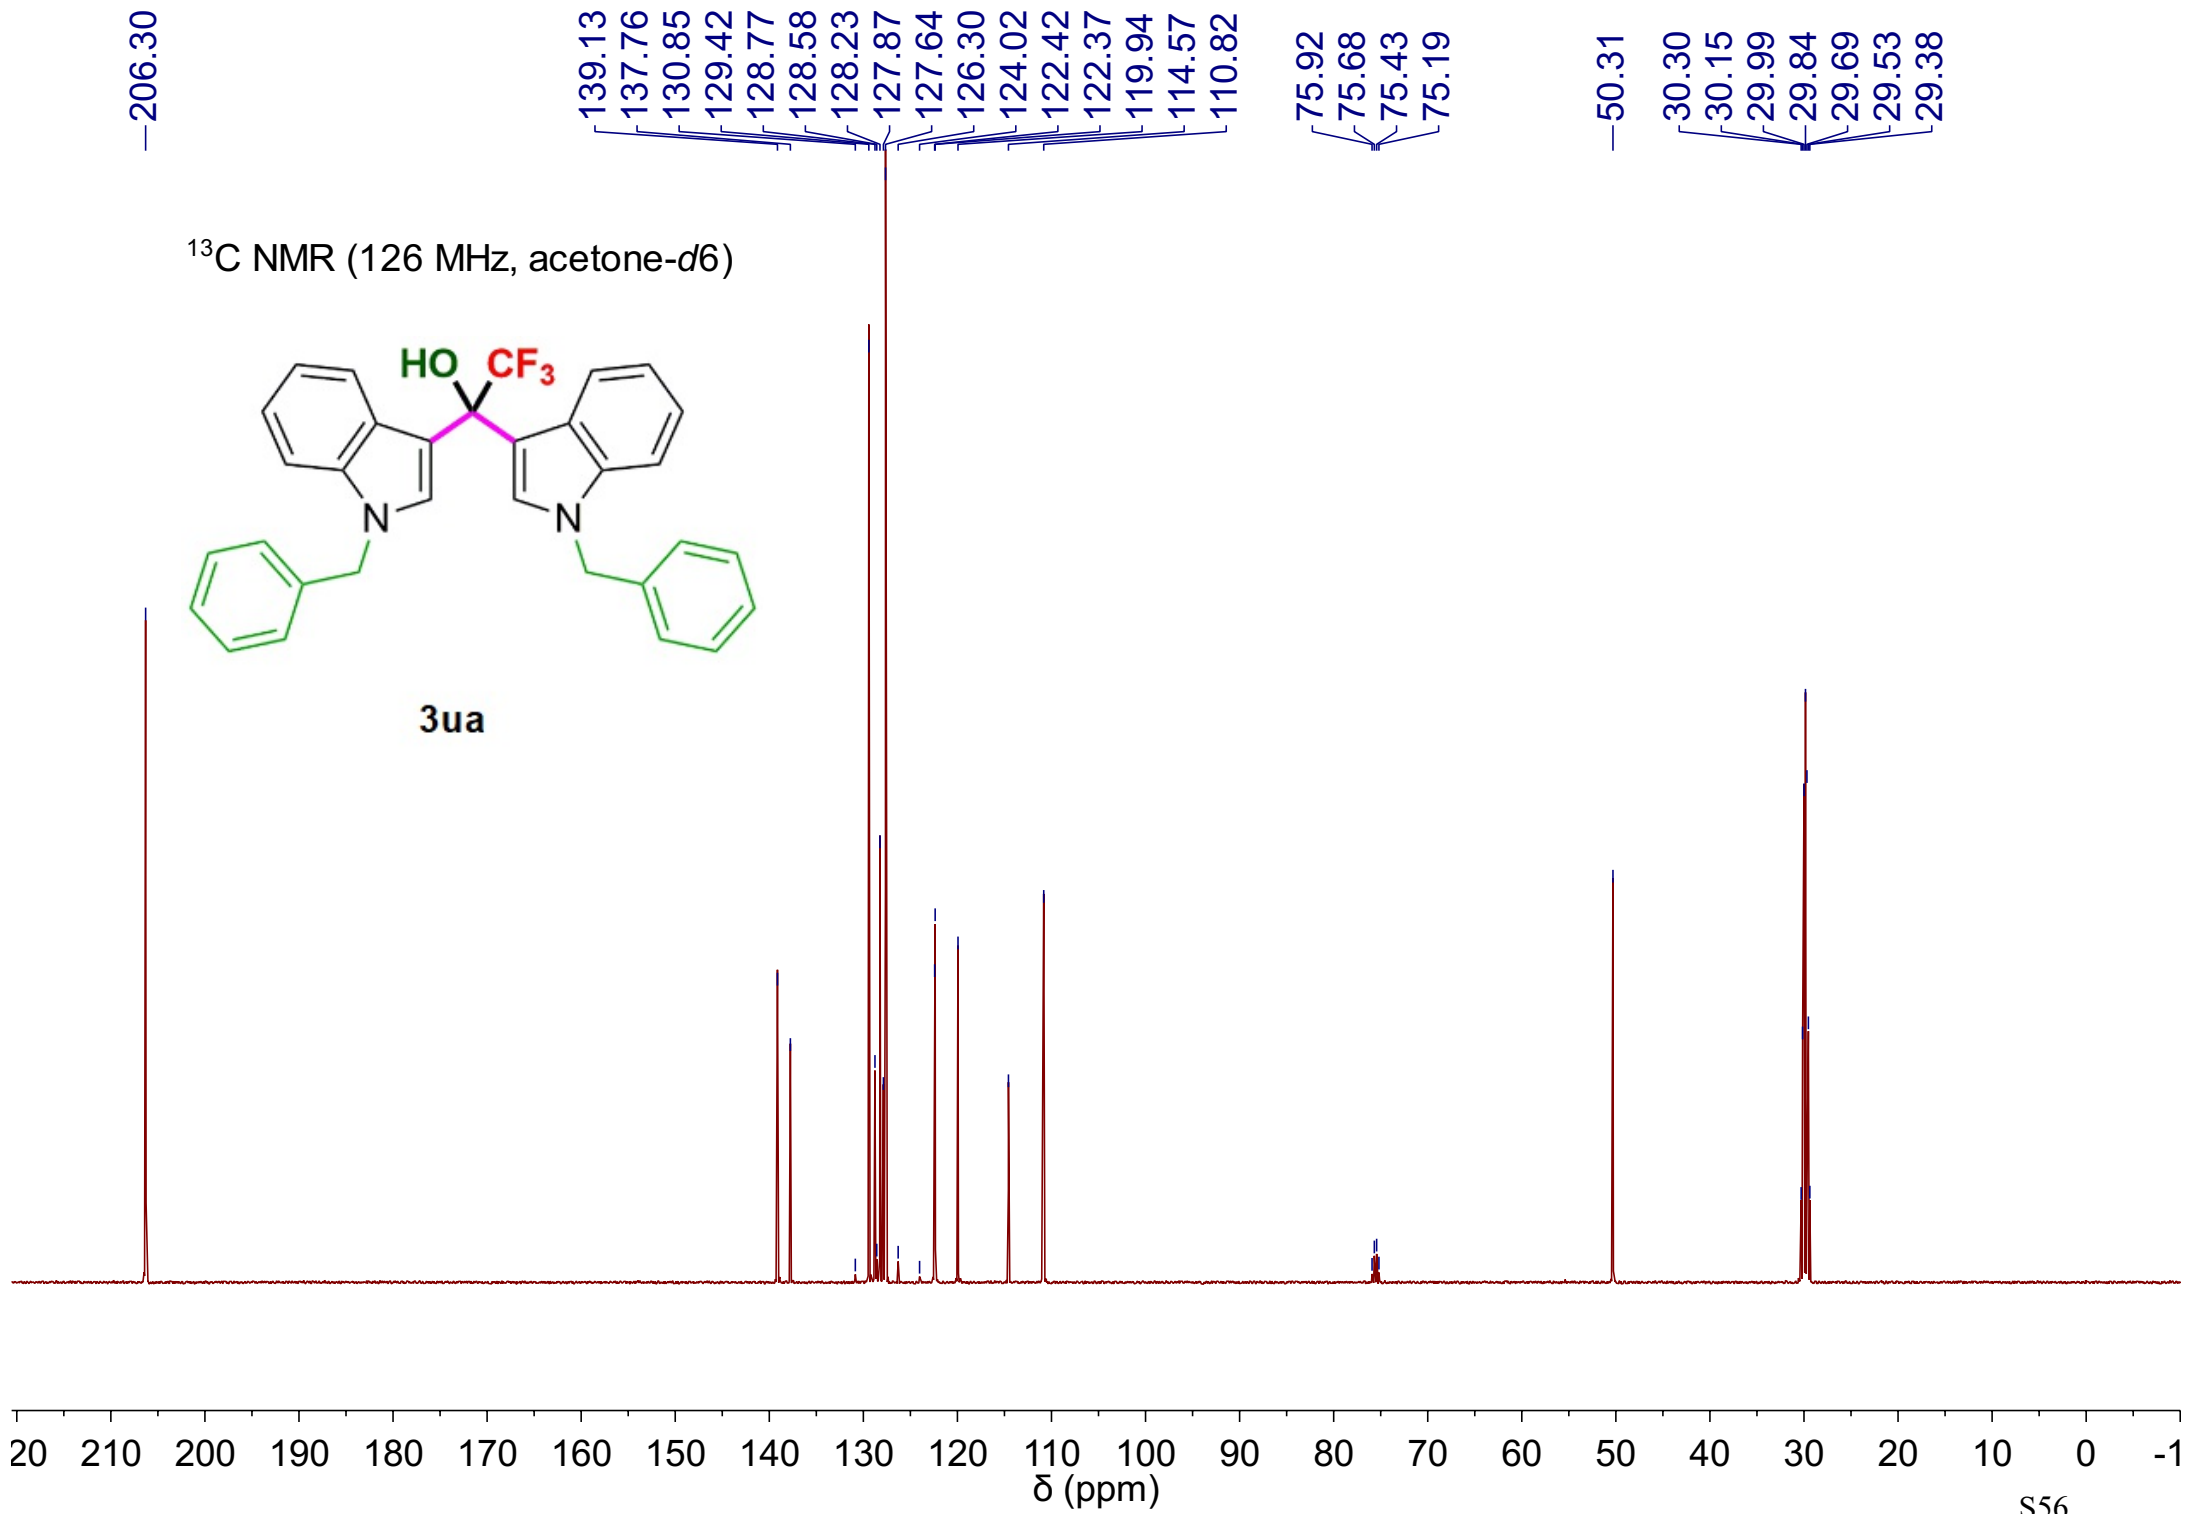

$^{19}\text{F}$  NMR (471 MHz, acetone- $d_6$ )

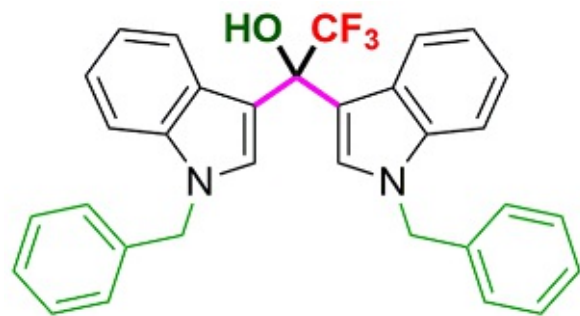

**3ua**

--77.24

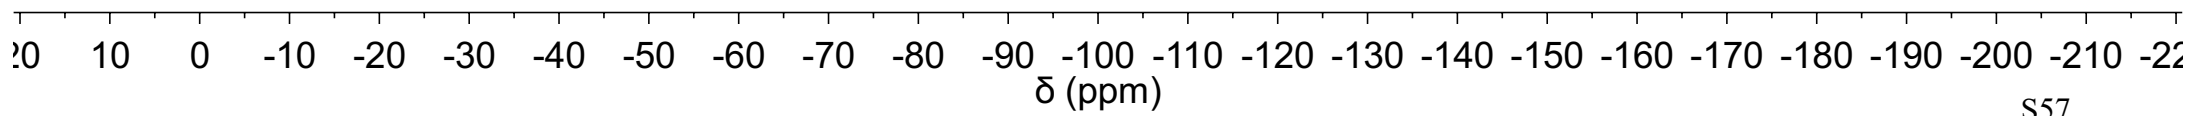

7.593  
7.427  
7.408  
7.355  
7.335  
7.266  
7.255  
7.249  
7.236  
7.101  
7.079  
7.063  
7.057  
7.045  
7.025  
7.007  
6.858  
6.839  
6.821  
5.655  
5.506

2.844  
2.811  
2.055  
2.050  
2.045

-0.003

<sup>1</sup>H NMR (400 MHz, acetone-d<sub>6</sub>)

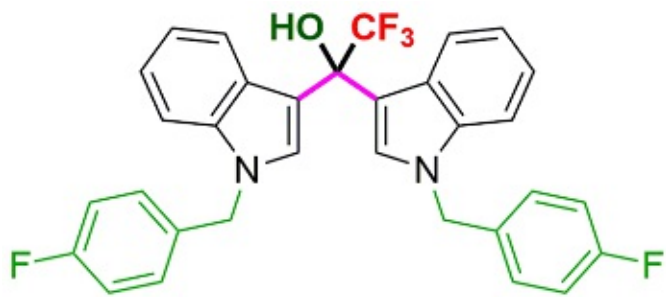

**3va**

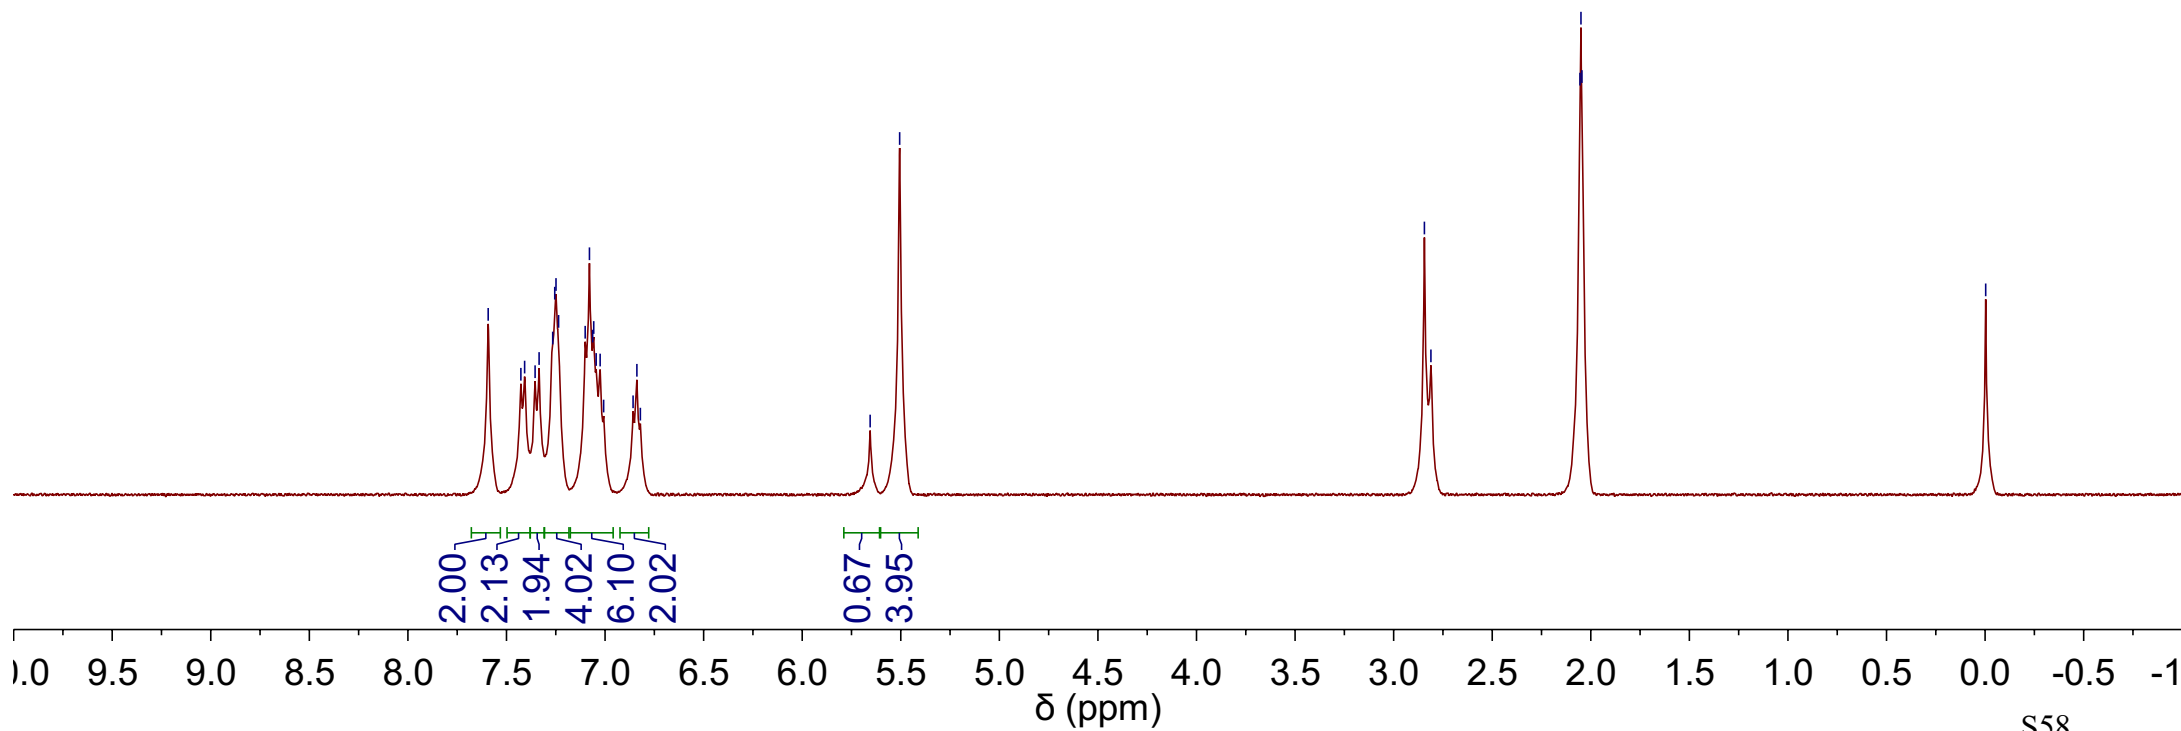

206.35

163.93  
162.00  
137.66  
135.25  
135.23  
130.83  
129.70  
129.63  
128.66  
128.56  
127.91  
126.28  
124.00  
122.48  
122.44  
120.05  
116.20  
116.02  
114.71  
110.81

75.92  
75.67  
75.43  
75.19

49.60  
30.30  
30.15  
29.99  
29.84  
29.69  
29.53  
29.38

<sup>13</sup>C NMR (126 MHz, acetone-d<sub>6</sub>)

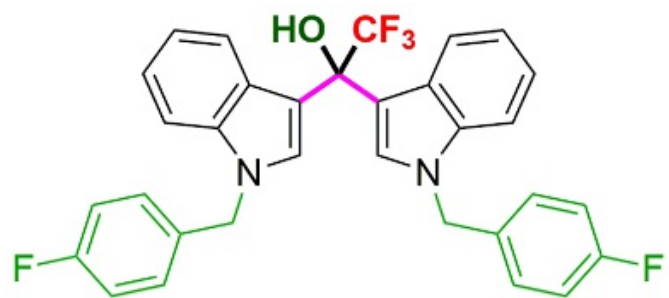

3va

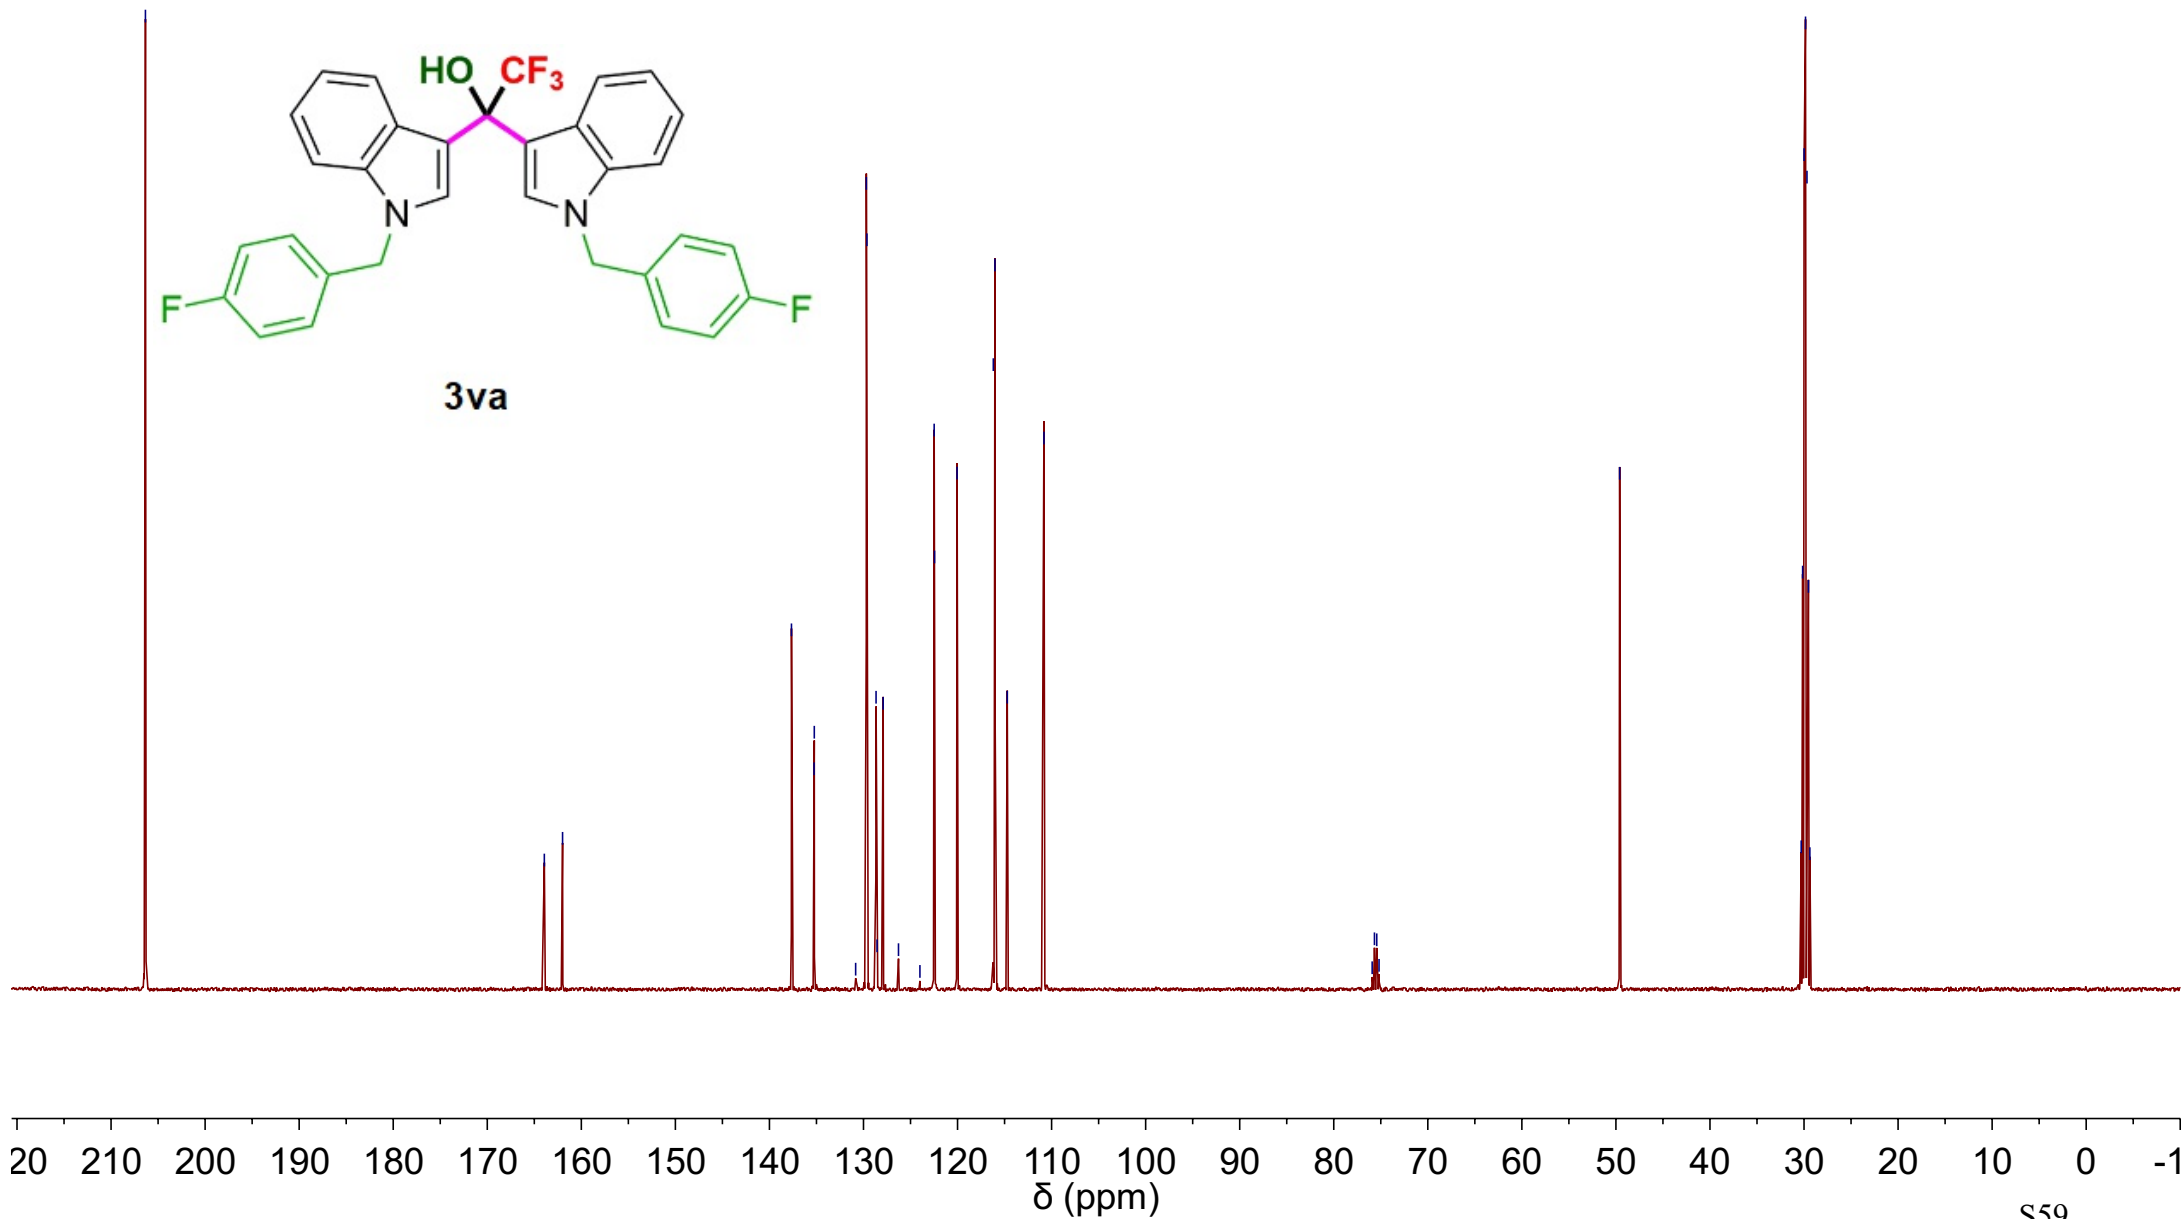

$^{19}\text{F}$  NMR (471 MHz, acetone- $d_6$ )

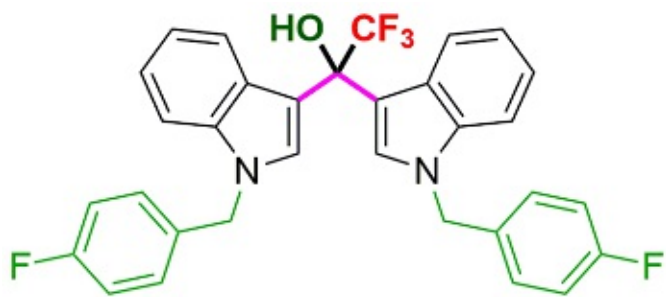

3va

--77.27

116.53  
116.55  
116.56  
116.57

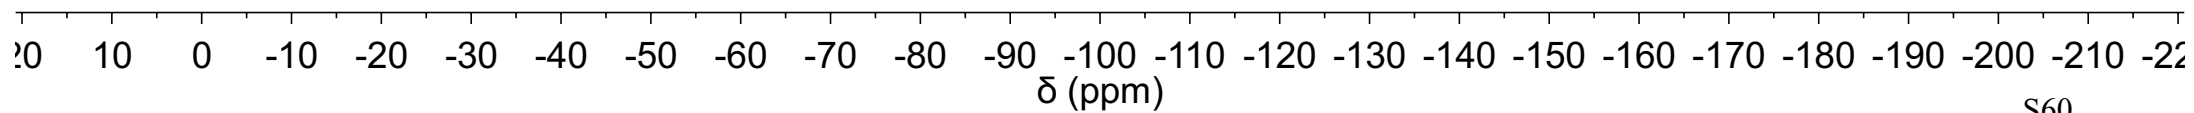

7.590  
7.445  
7.425  
7.368  
7.360  
7.347  
7.339  
7.143  
7.122  
7.041  
7.021  
7.003  
6.845  
6.826  
6.808  
5.630  
5.463

2.840  
2.806  
2.060  
2.055  
2.050  
2.045

1.276

-0.003

<sup>1</sup>H NMR (400 MHz, acetone-d<sub>6</sub>)

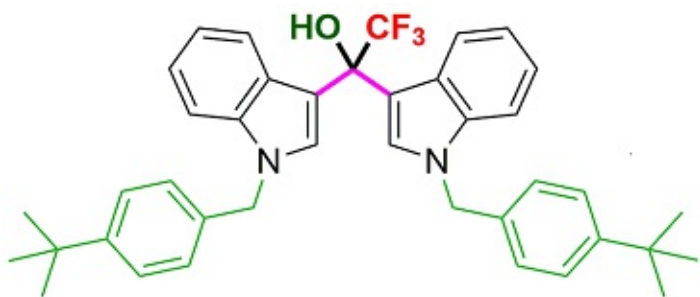

**3wa**

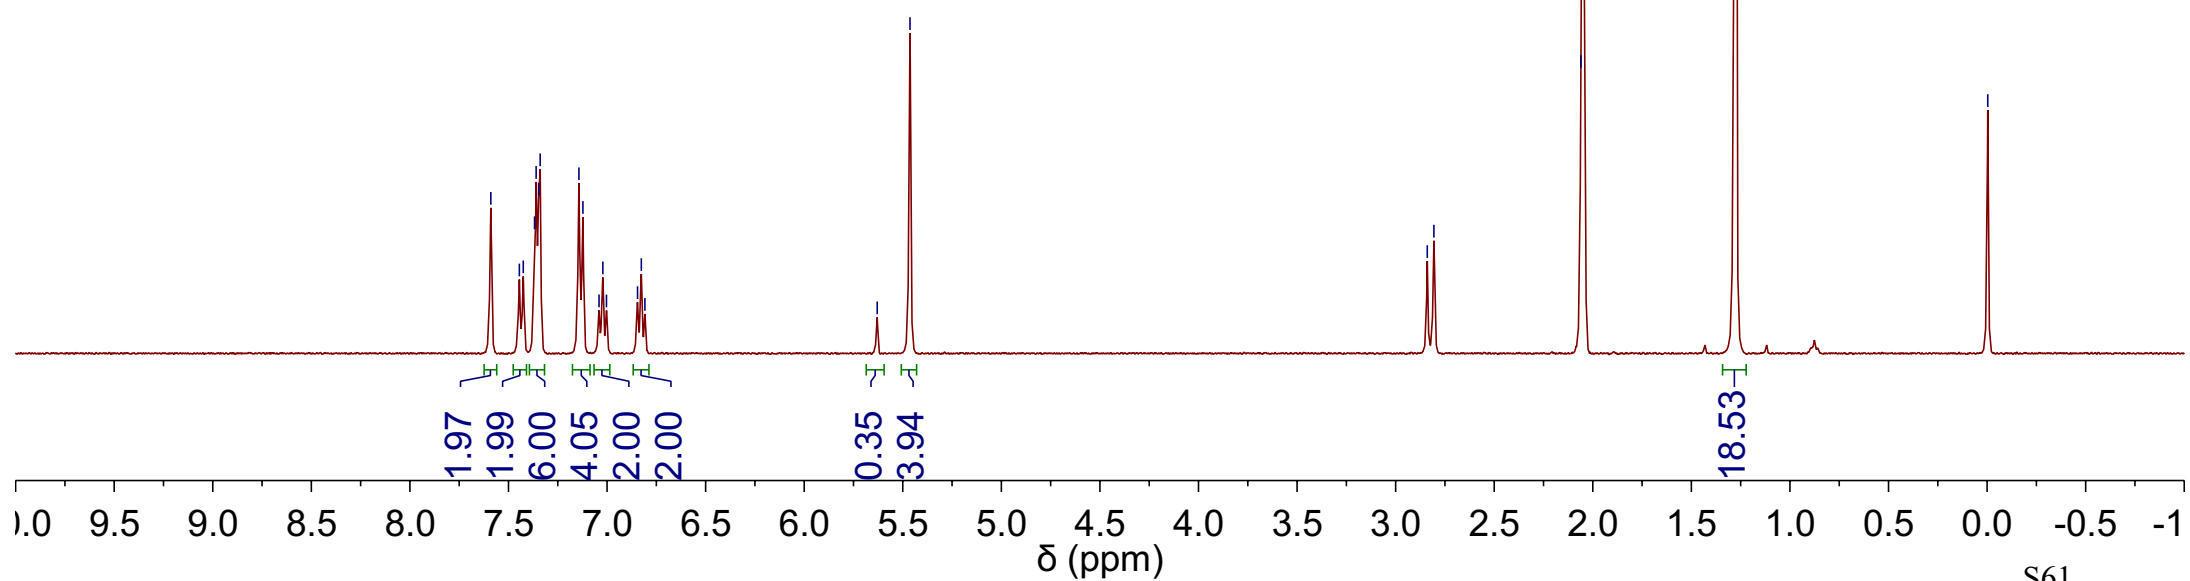

-206.27

-150.97

-137.74

-136.11

-130.86

-128.75

-128.58

-127.84

-127.41

-126.24

-124.02

-122.44

-122.30

-119.87

-114.50

-110.81

-75.93

-75.69

-75.44

-75.20

-49.97

-34.96

-31.62

-30.30

-30.15

-29.99

-29.84

-29.69

-29.53

-29.38

<sup>13</sup>C NMR (126 MHz, acetone-*d*<sub>6</sub>)

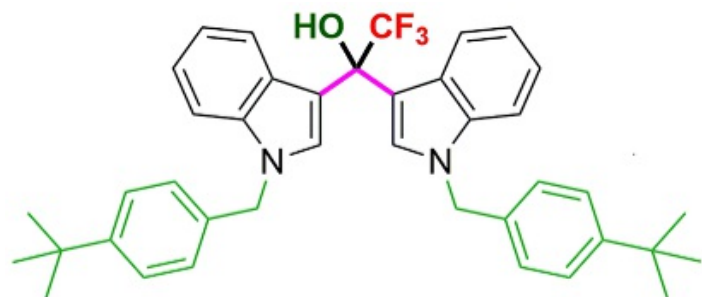

3wa

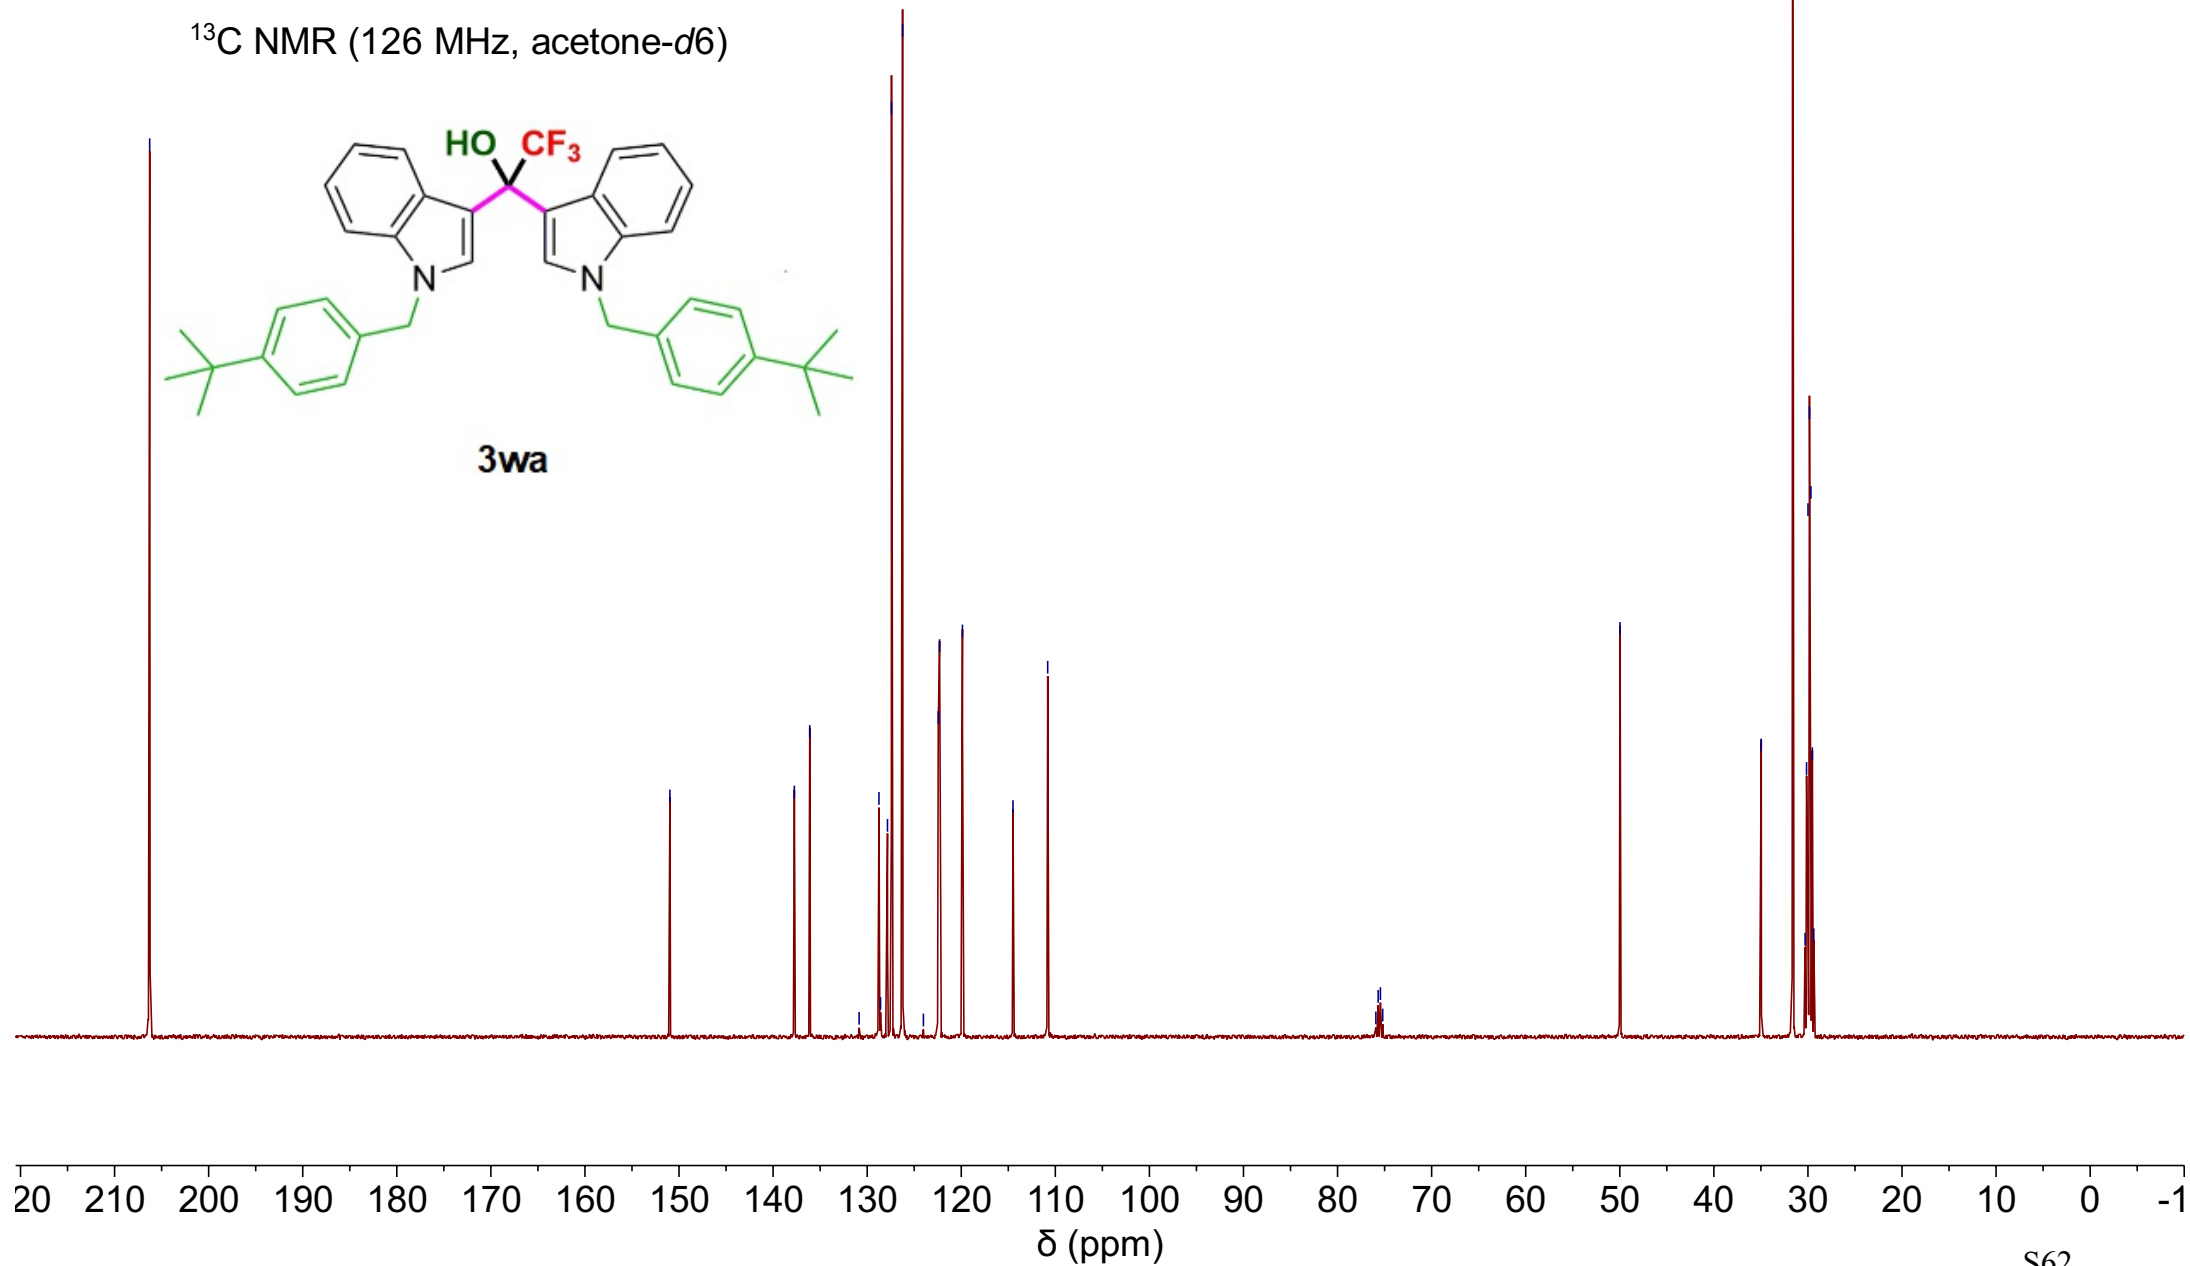

$^{19}\text{F}$  NMR (471 MHz, acetone-*d*6)

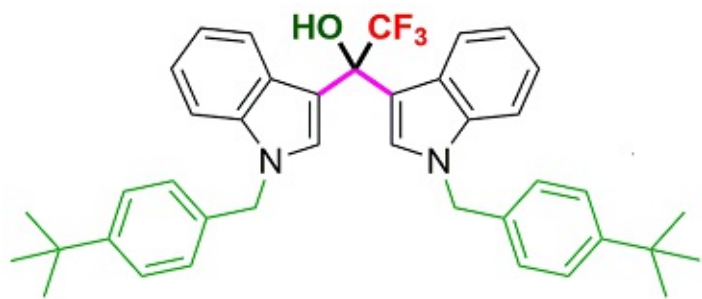

**3wa**

---77.14

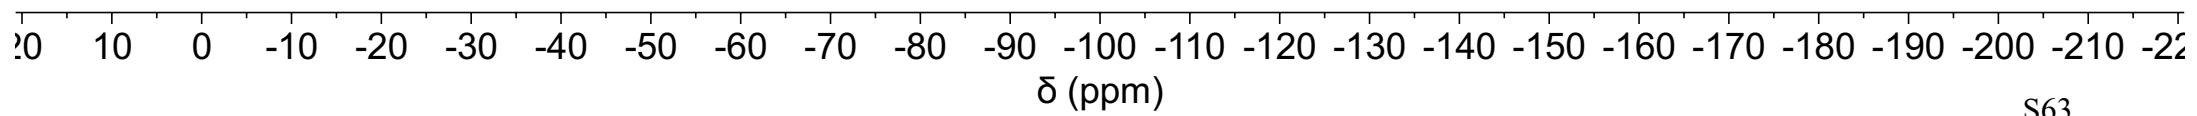



<sup>1</sup>H NMR (500 MHz, acetone-*d*<sub>6</sub>)

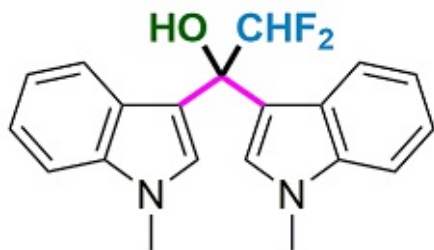

**3ab**

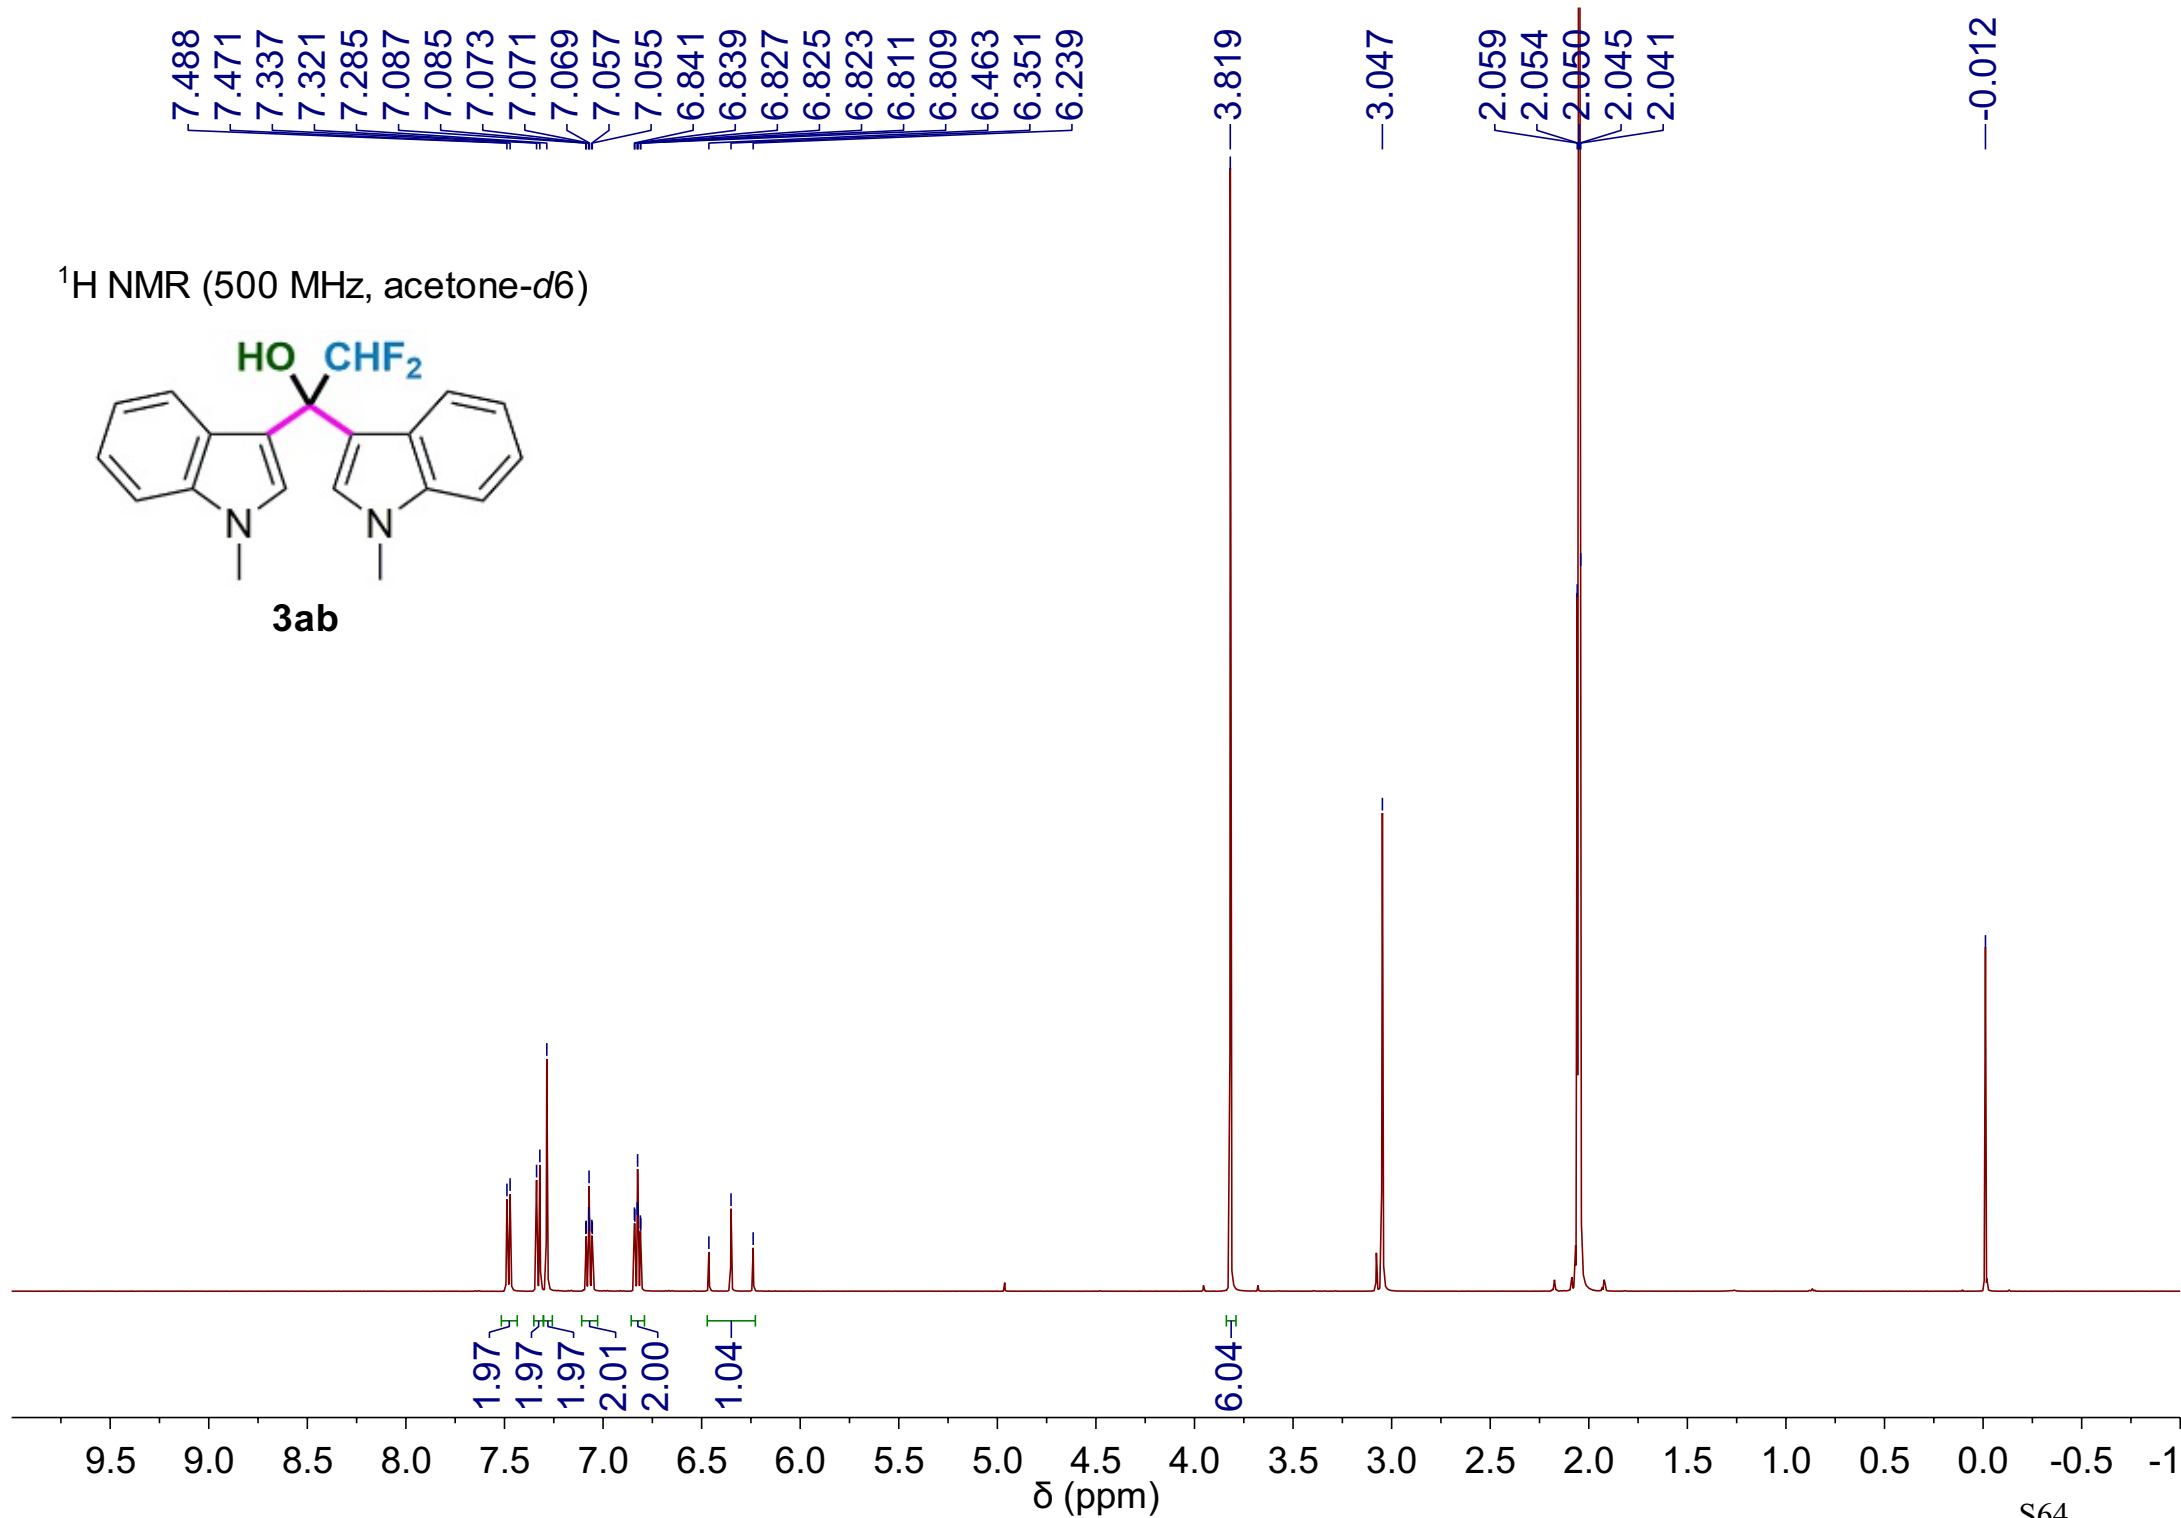

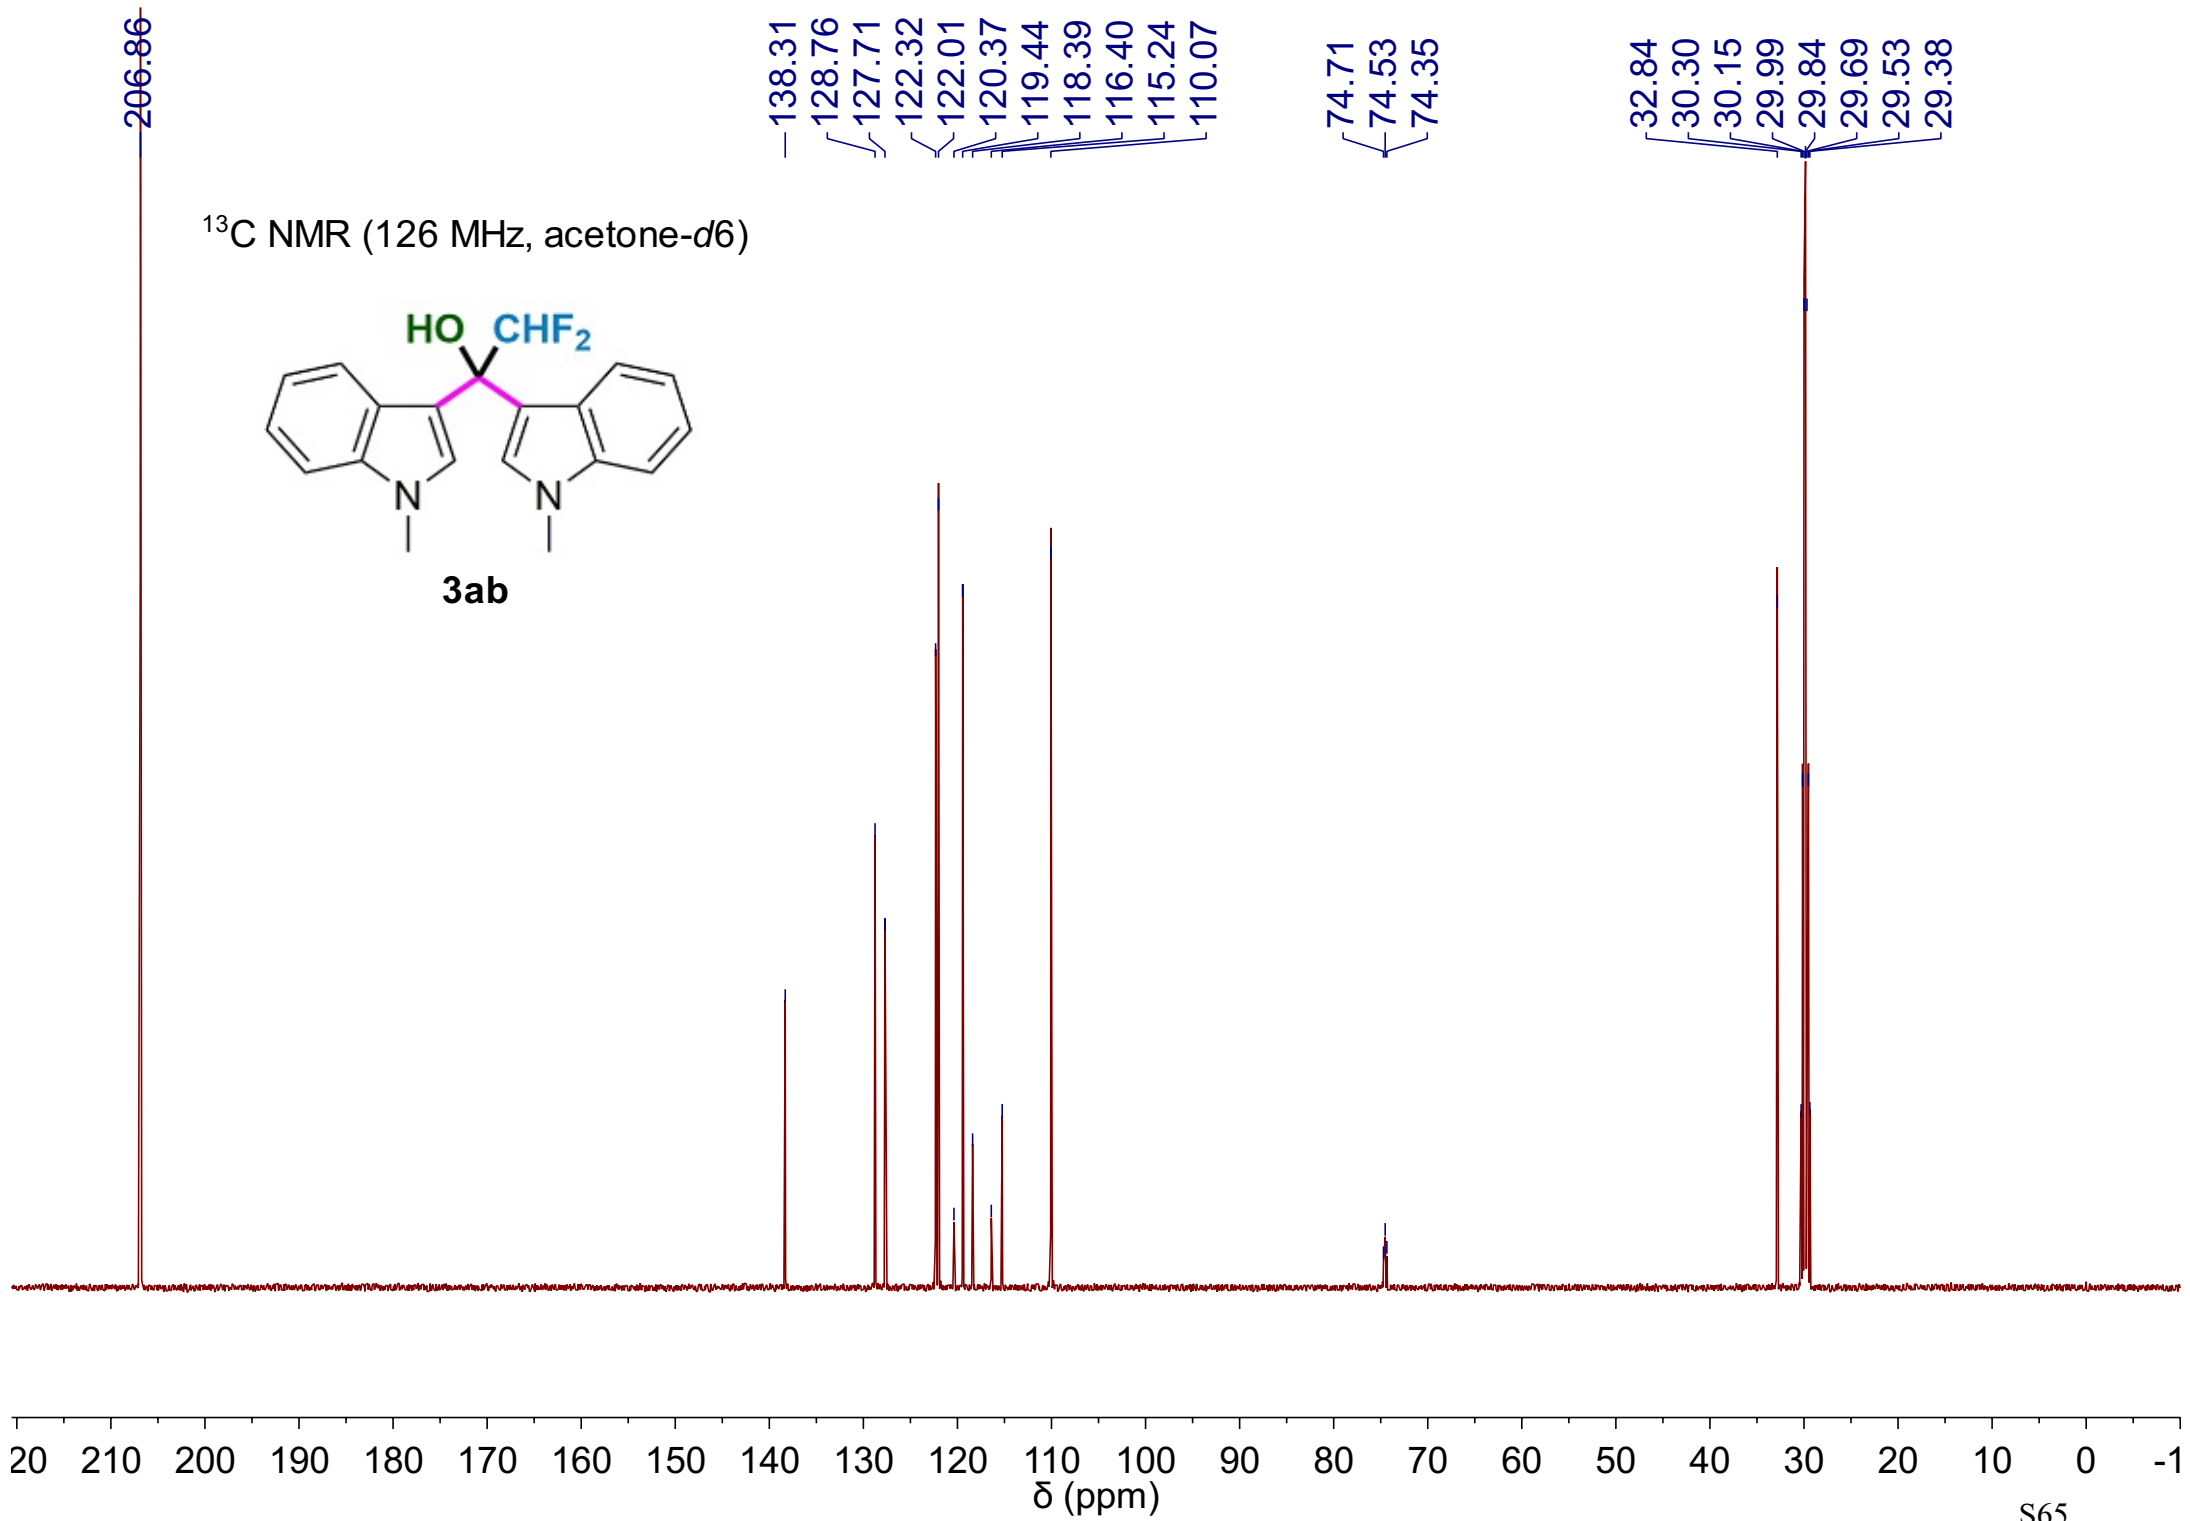

-126.34  
-126.35  
-126.46  
-126.47

$^{19}\text{F}$  NMR (471 MHz, acetone-*d*6)

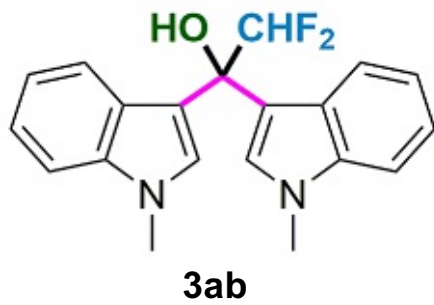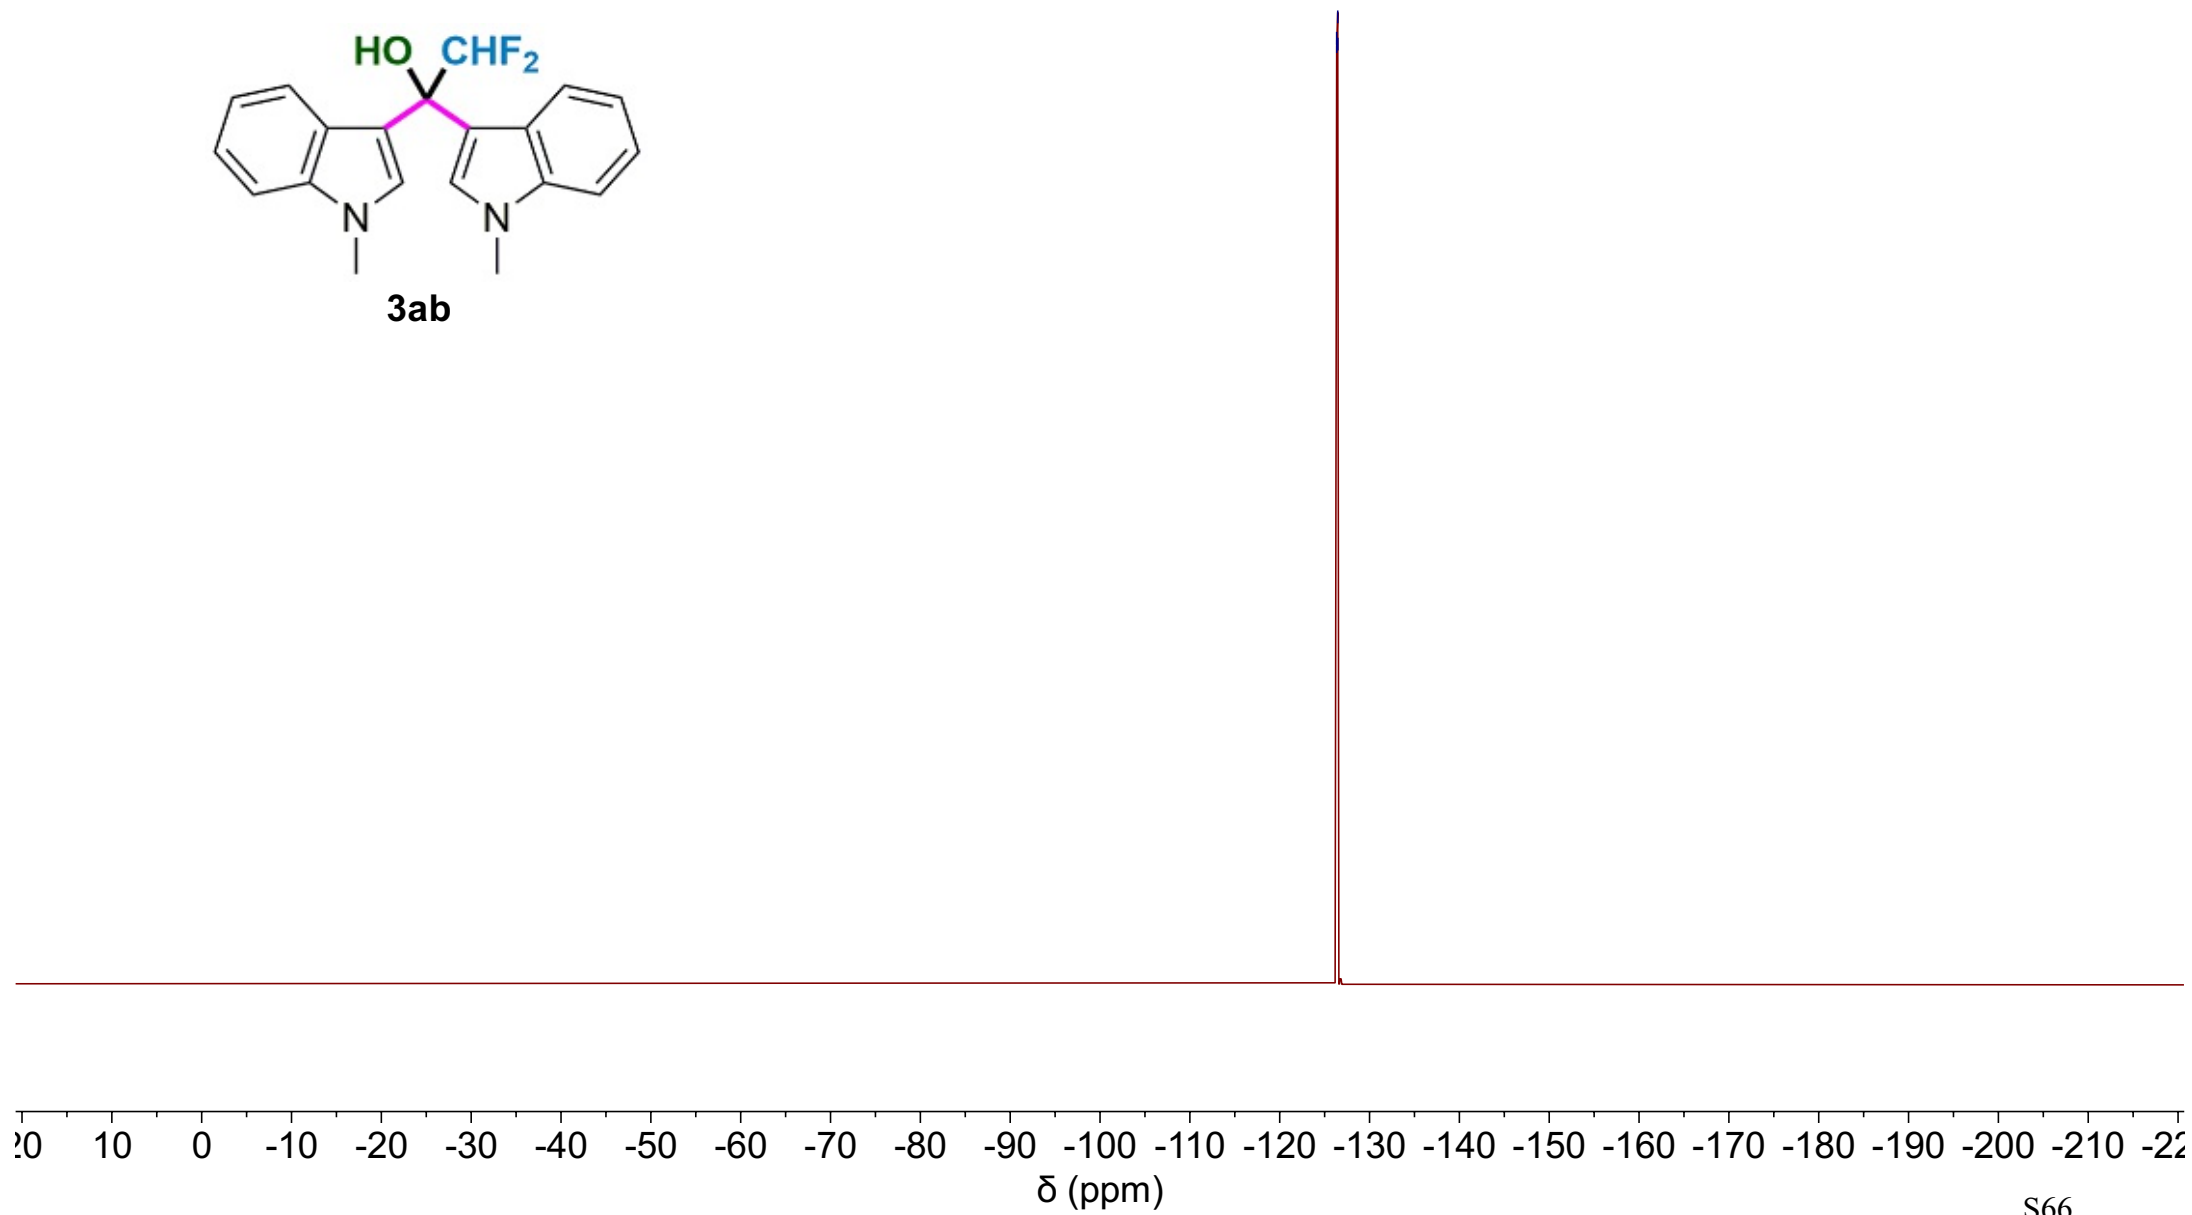

7.691  
7.687  
7.355  
7.337  
7.320  
7.221  
7.217  
7.203  
7.199  
6.448  
6.336  
6.224

3.839

3.046

2.059  
2.055  
2.050  
2.046  
2.042

-0.013

<sup>1</sup>H NMR (500 MHz, acetone-d<sub>6</sub>)

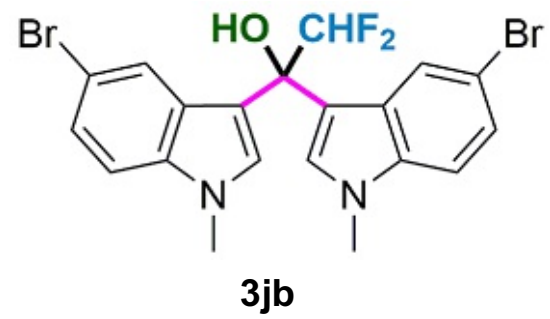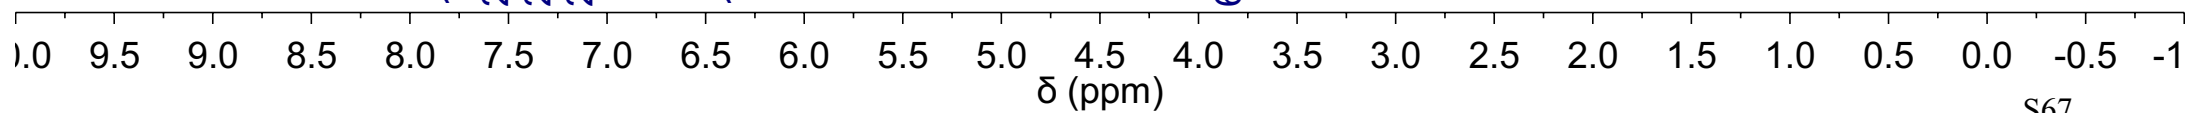

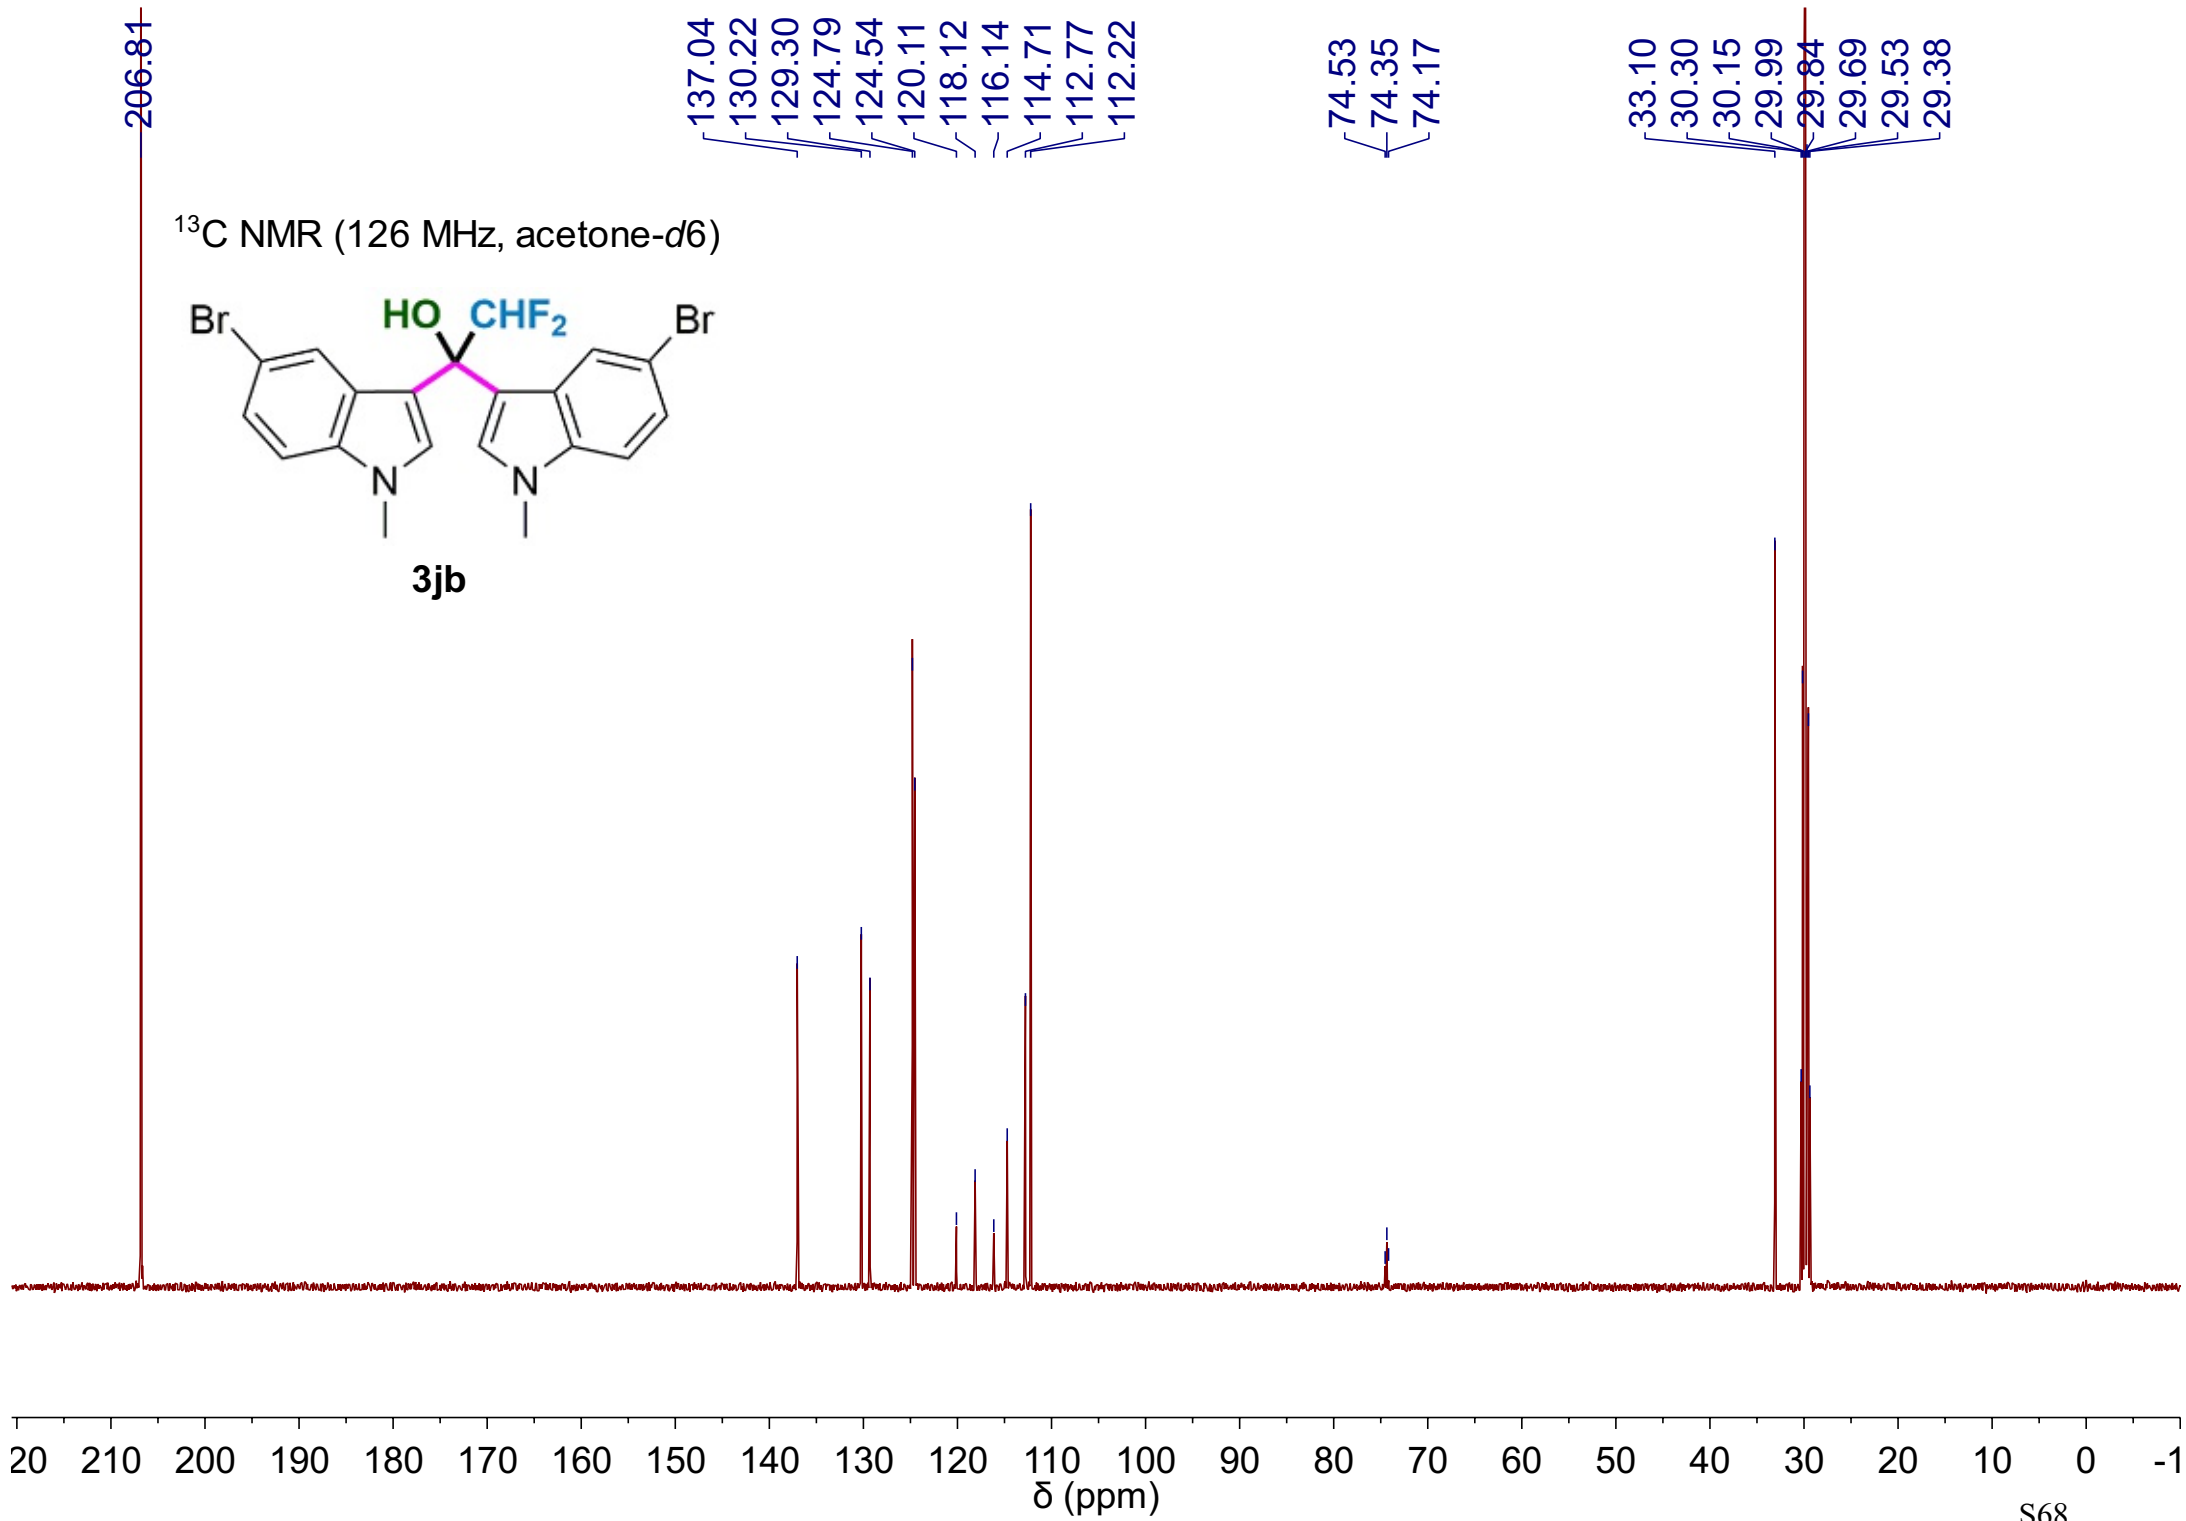

<sup>19</sup>F NMR (471 MHz, acetone-*d*<sub>6</sub>)

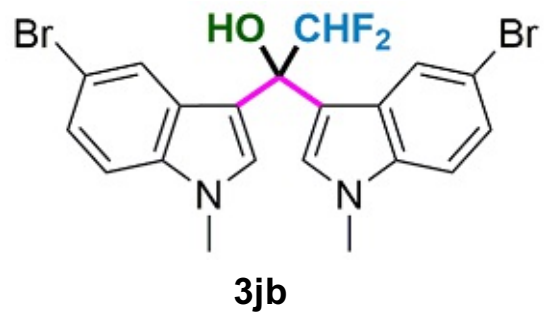

-126.55  
-126.67

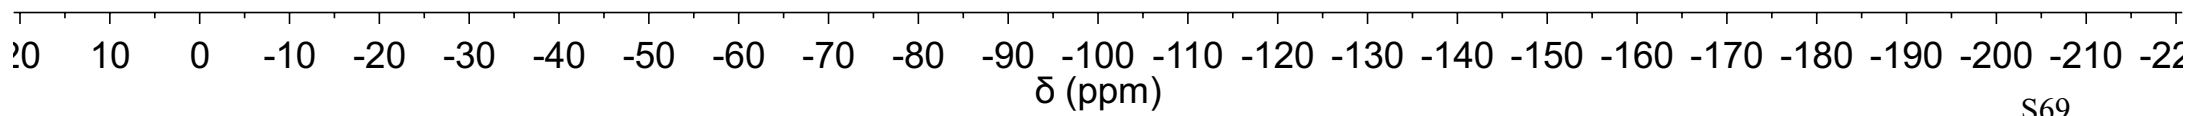

<sup>1</sup>H NMR (500 MHz, acetone-*d*6)

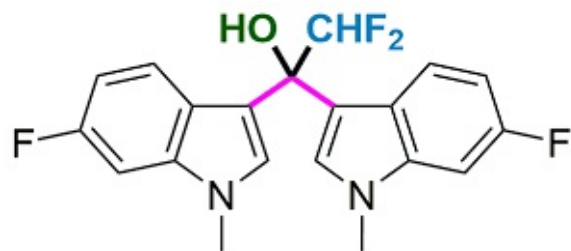

**3b**

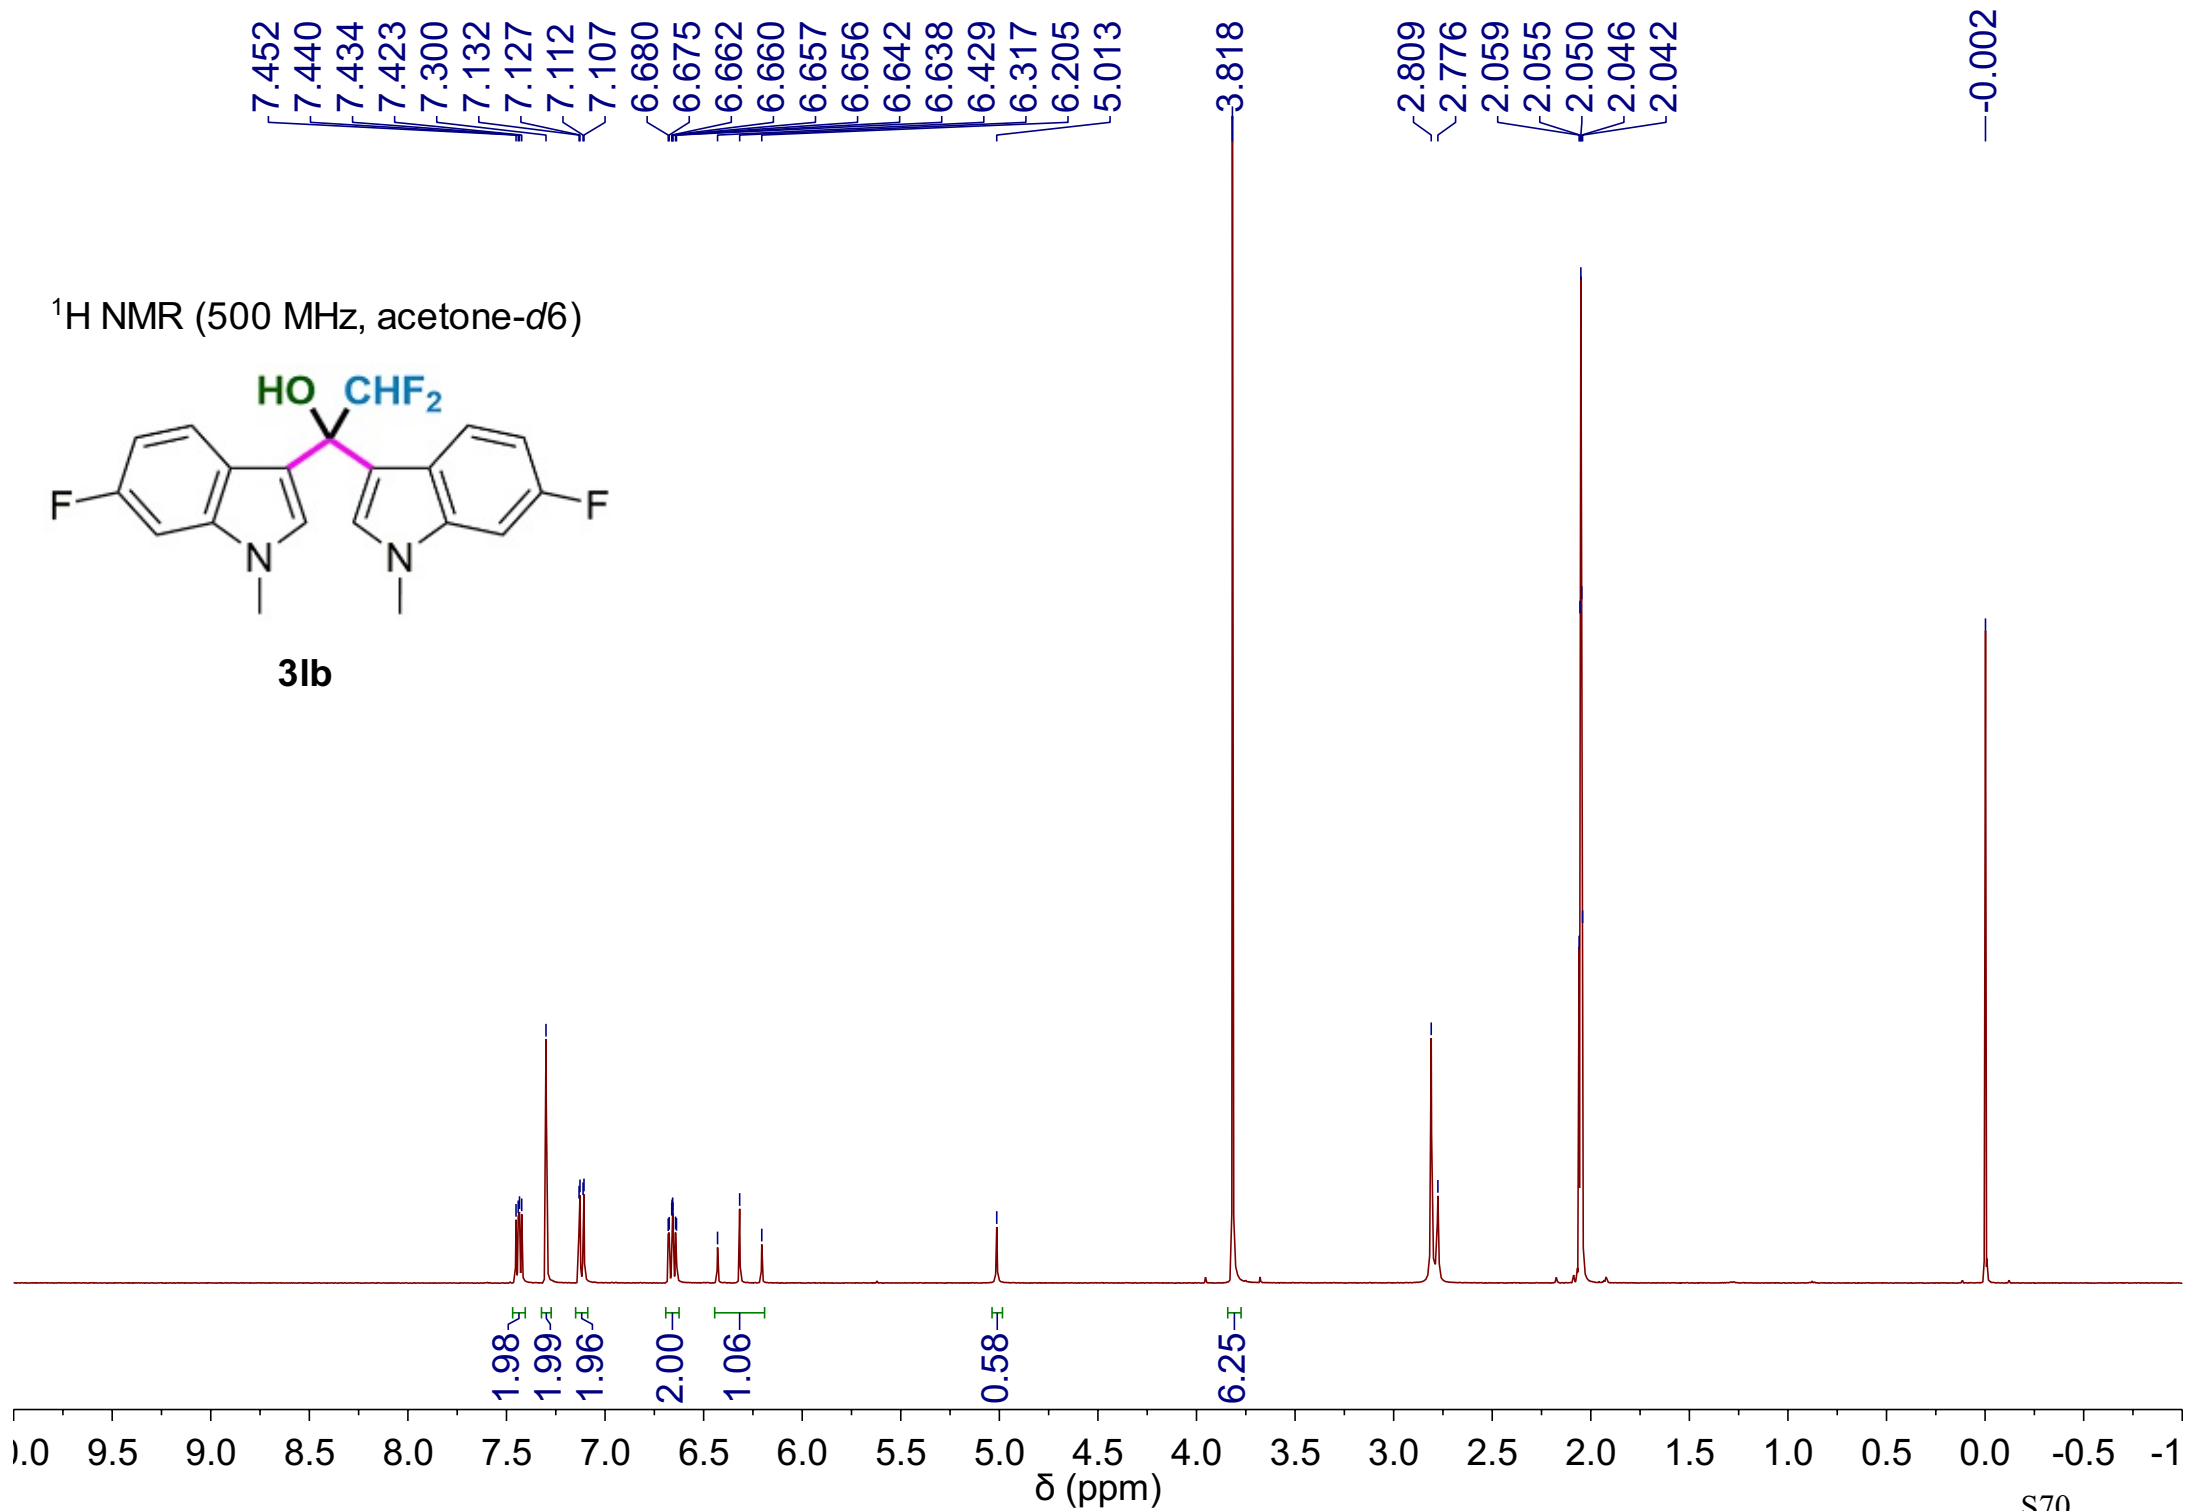

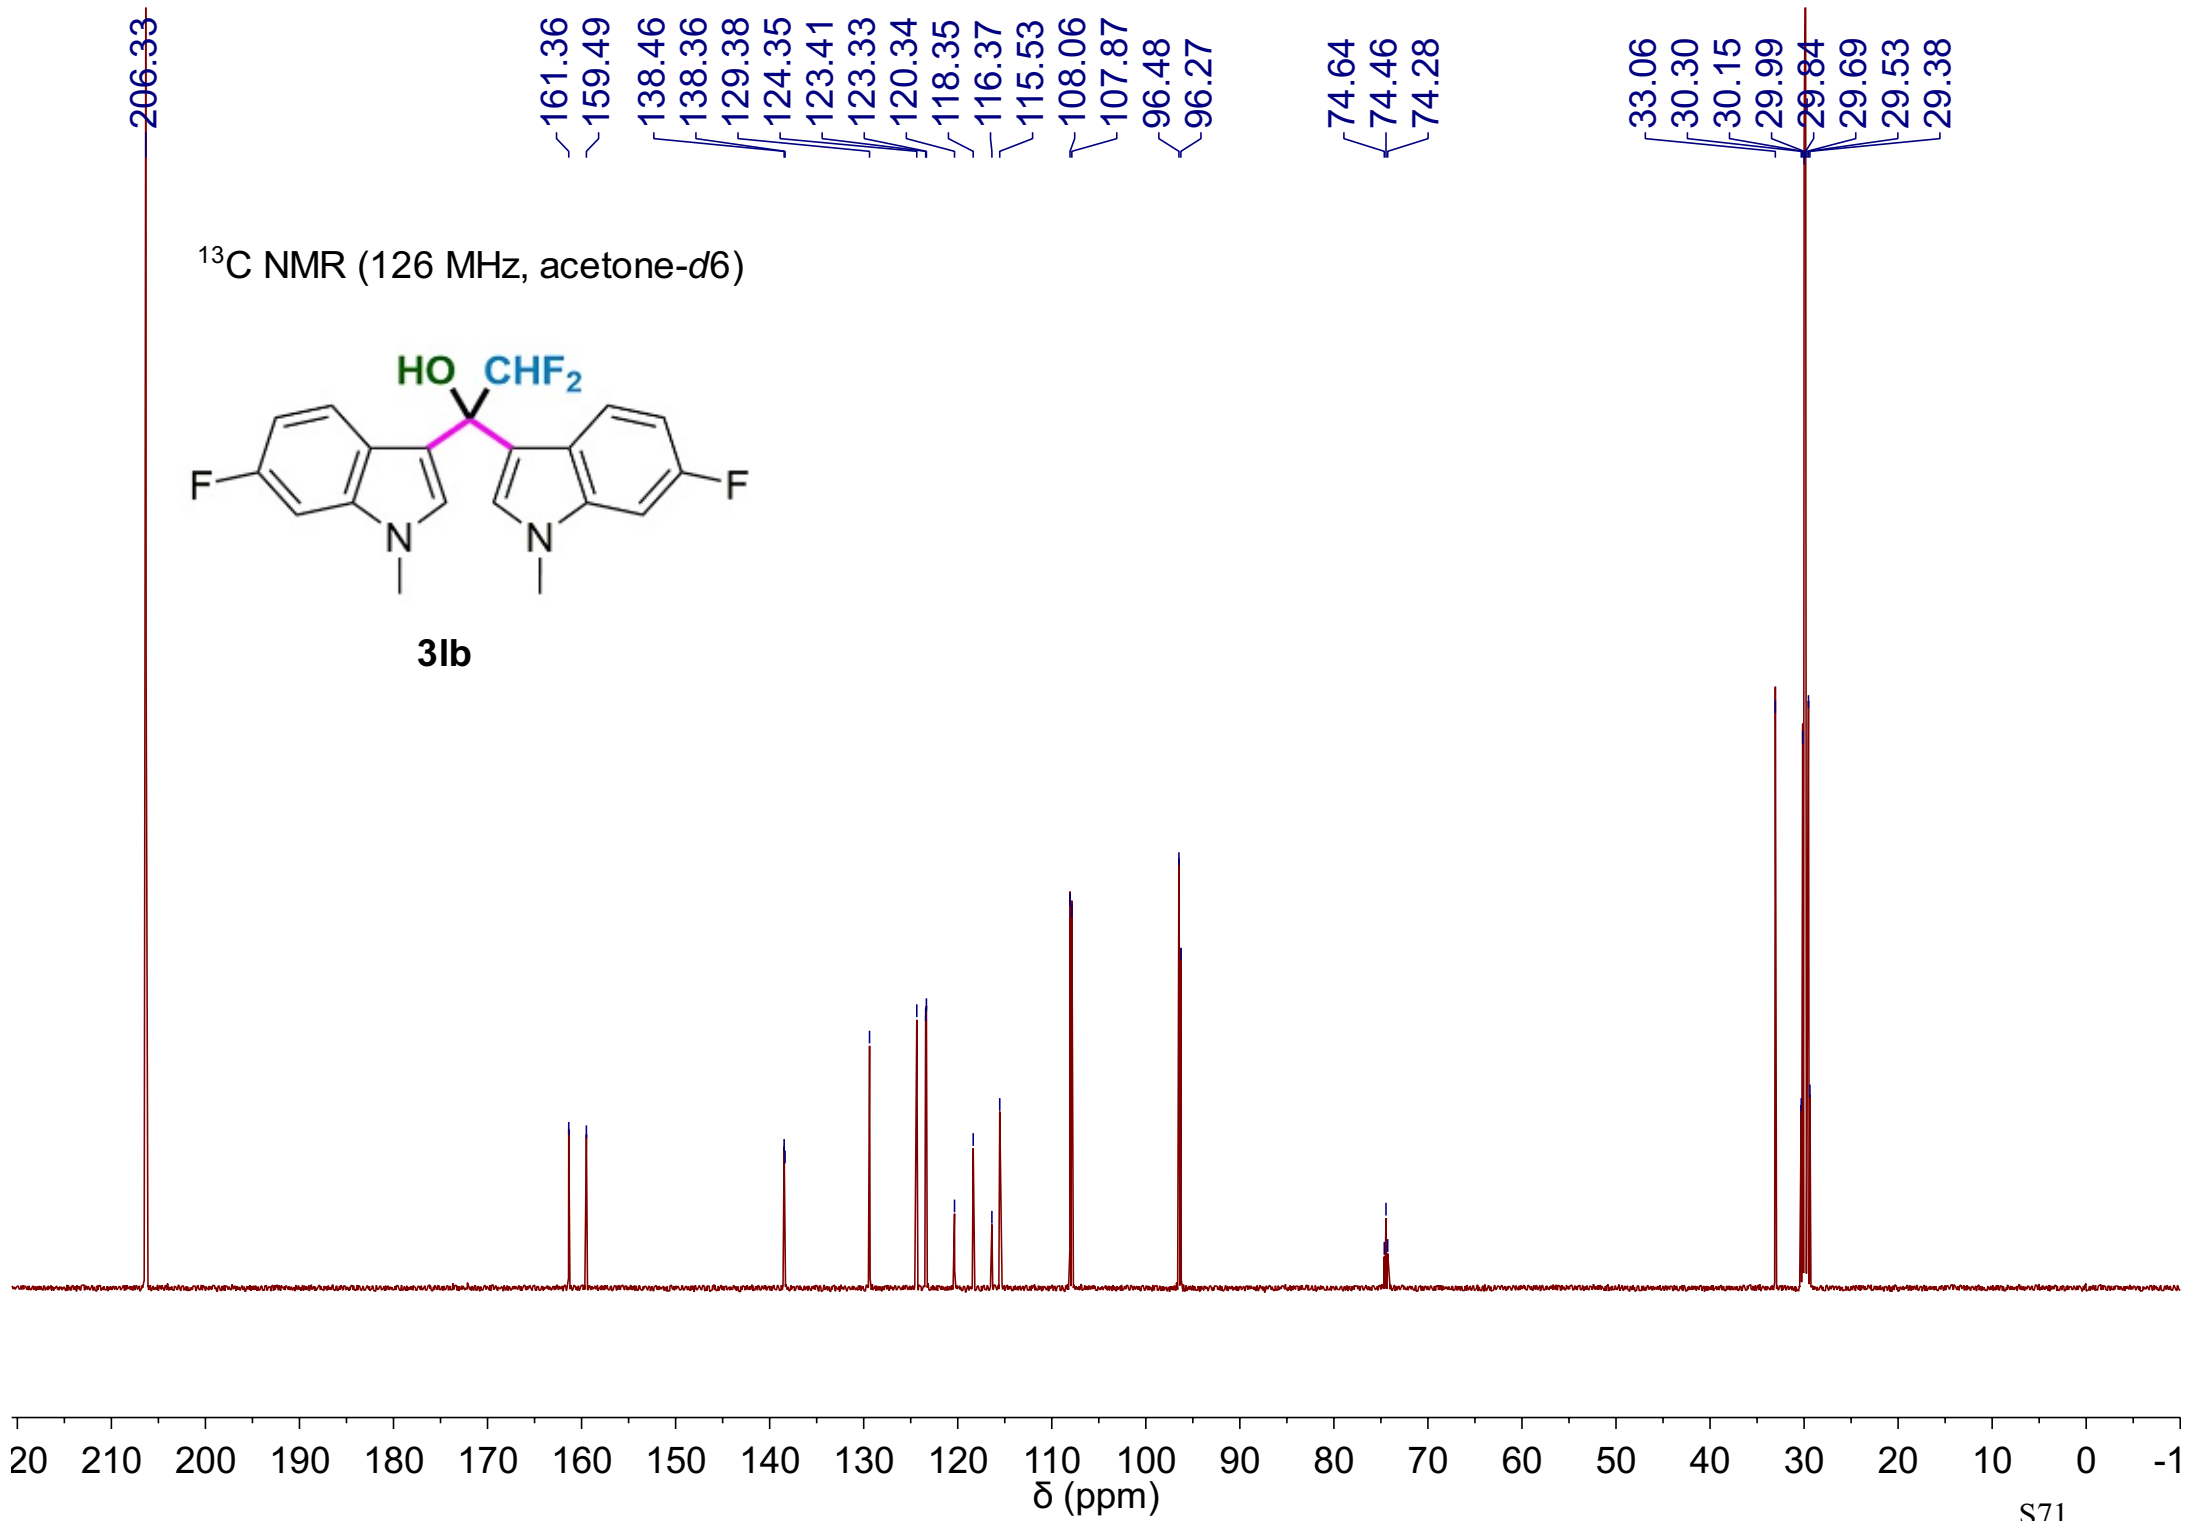



$^{19}\text{F}$  NMR (471 MHz, acetone- $d_6$ )

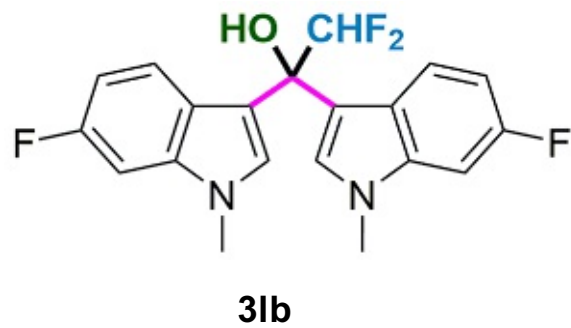

122.73  
122.75  
122.75  
122.77  
122.77  
122.79  
126.42  
126.53

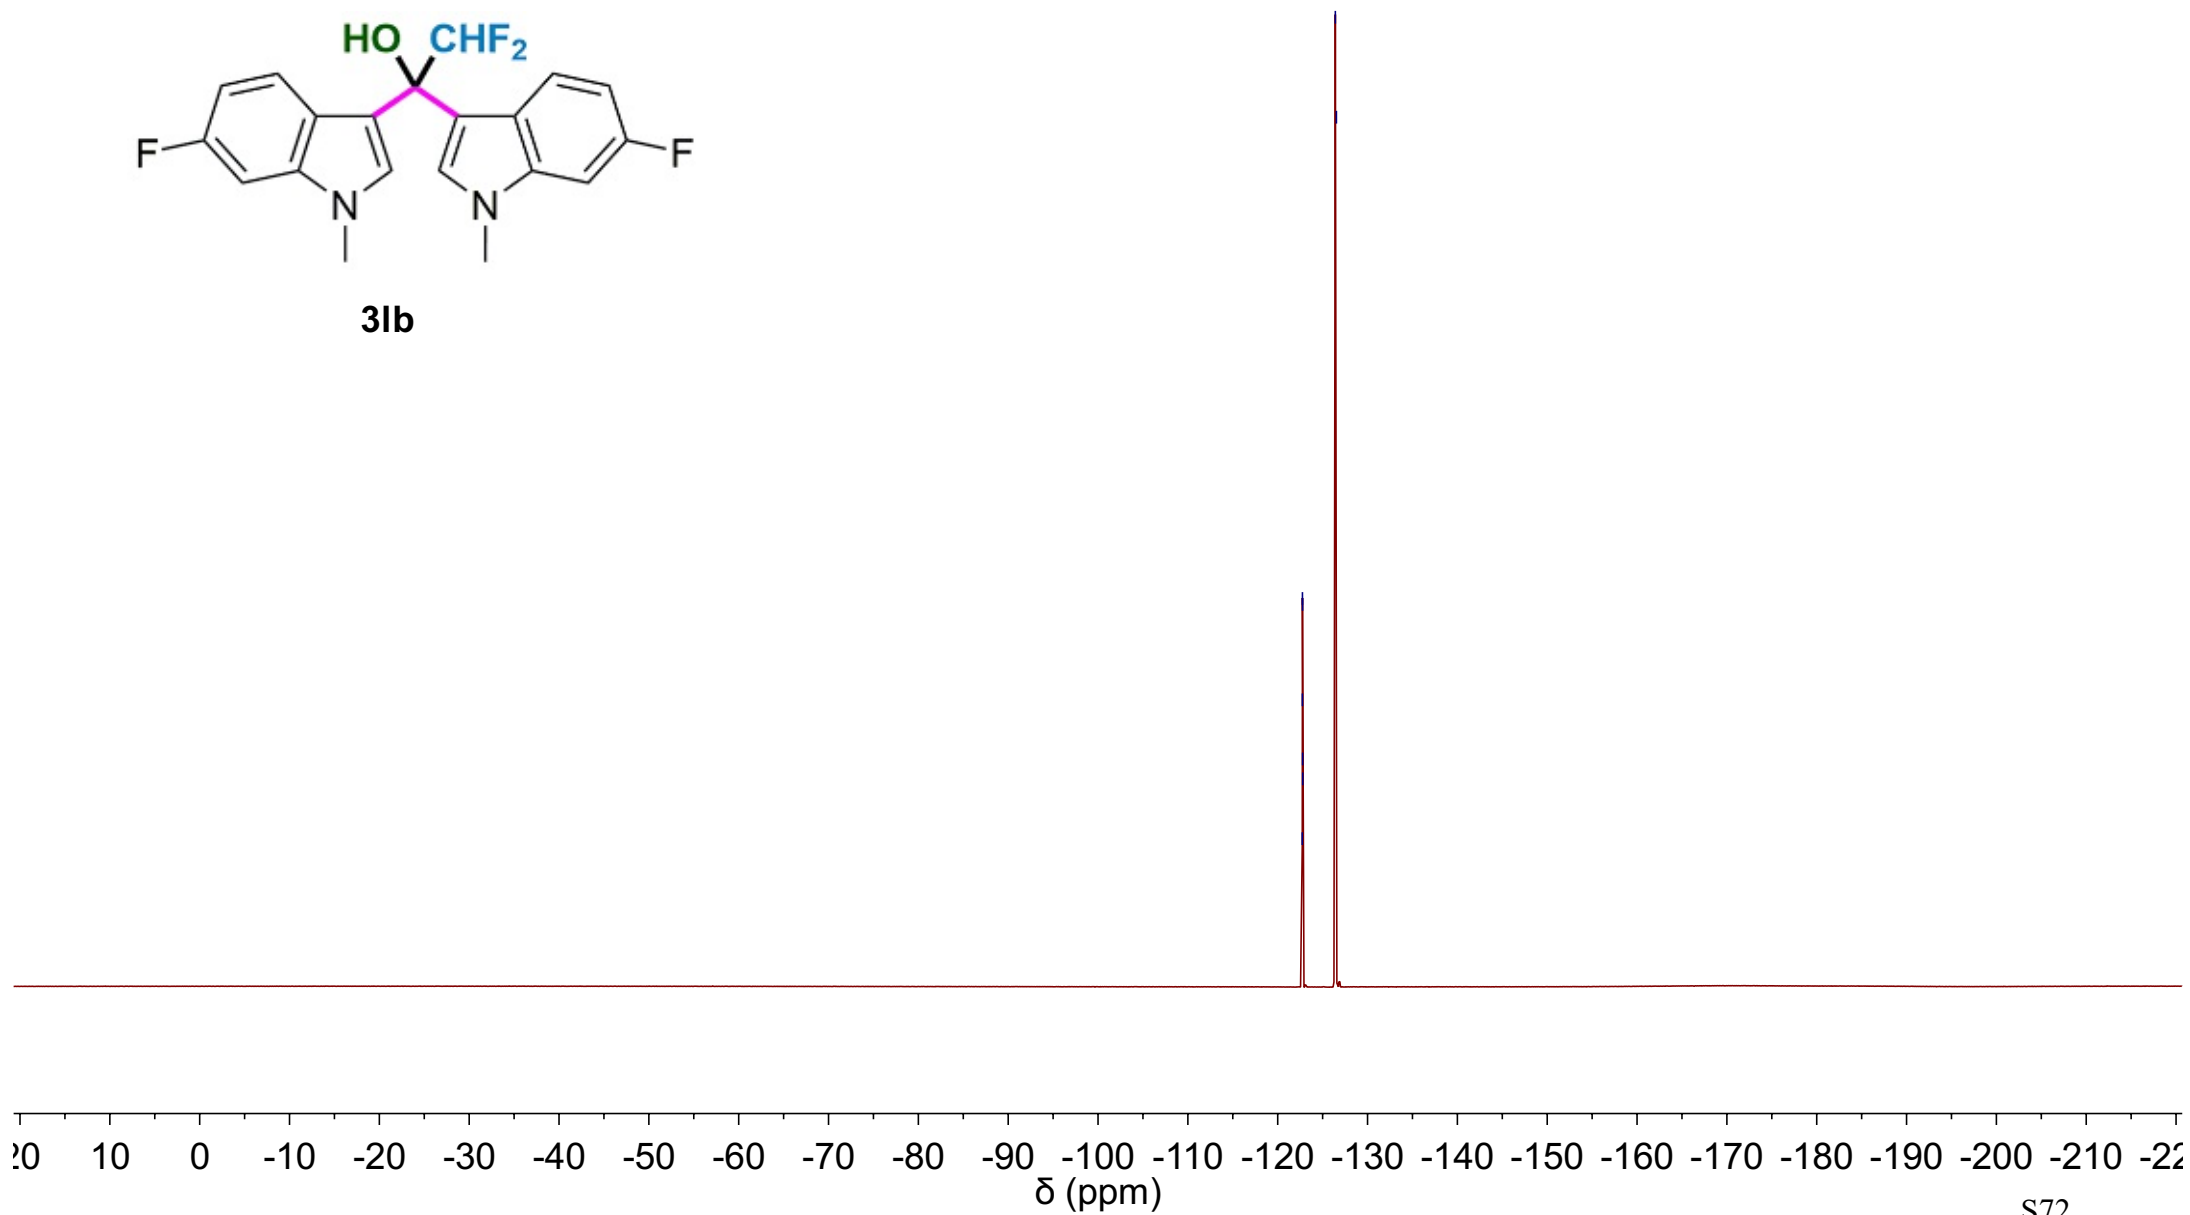

7.462  
7.458  
7.453  
7.445  
7.441  
7.436  
7.424  
7.420  
7.353  
6.874  
6.873  
6.871  
6.867  
6.860  
6.857  
6.854  
6.850  
6.462  
6.458  
6.350  
6.346  
6.238  
6.234  
5.116  
3.833  
3.830

-2.880  
2.059  
2.054  
2.050  
2.046  
2.041

-0.018

<sup>1</sup>H NMR (500 MHz, acetone-d<sub>6</sub>)

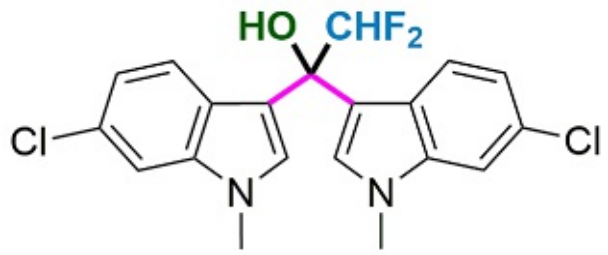

3mb

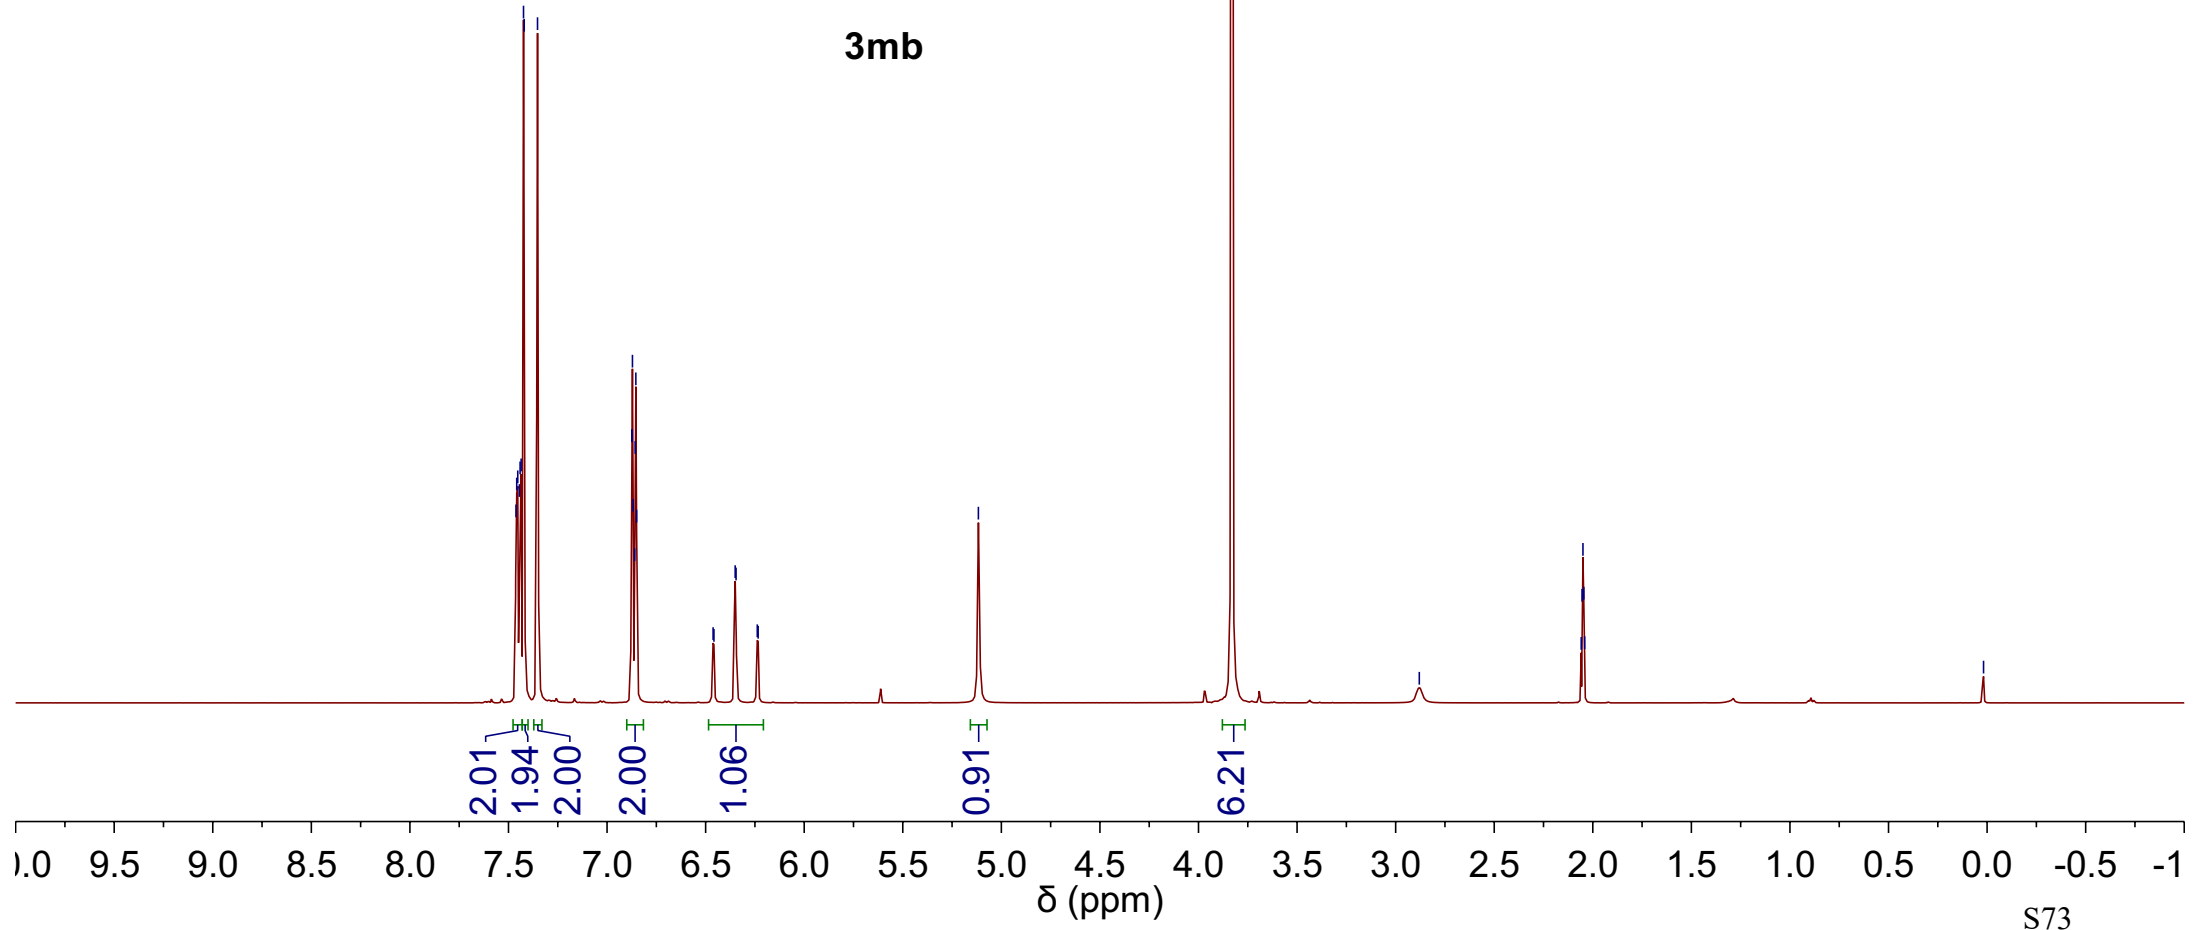

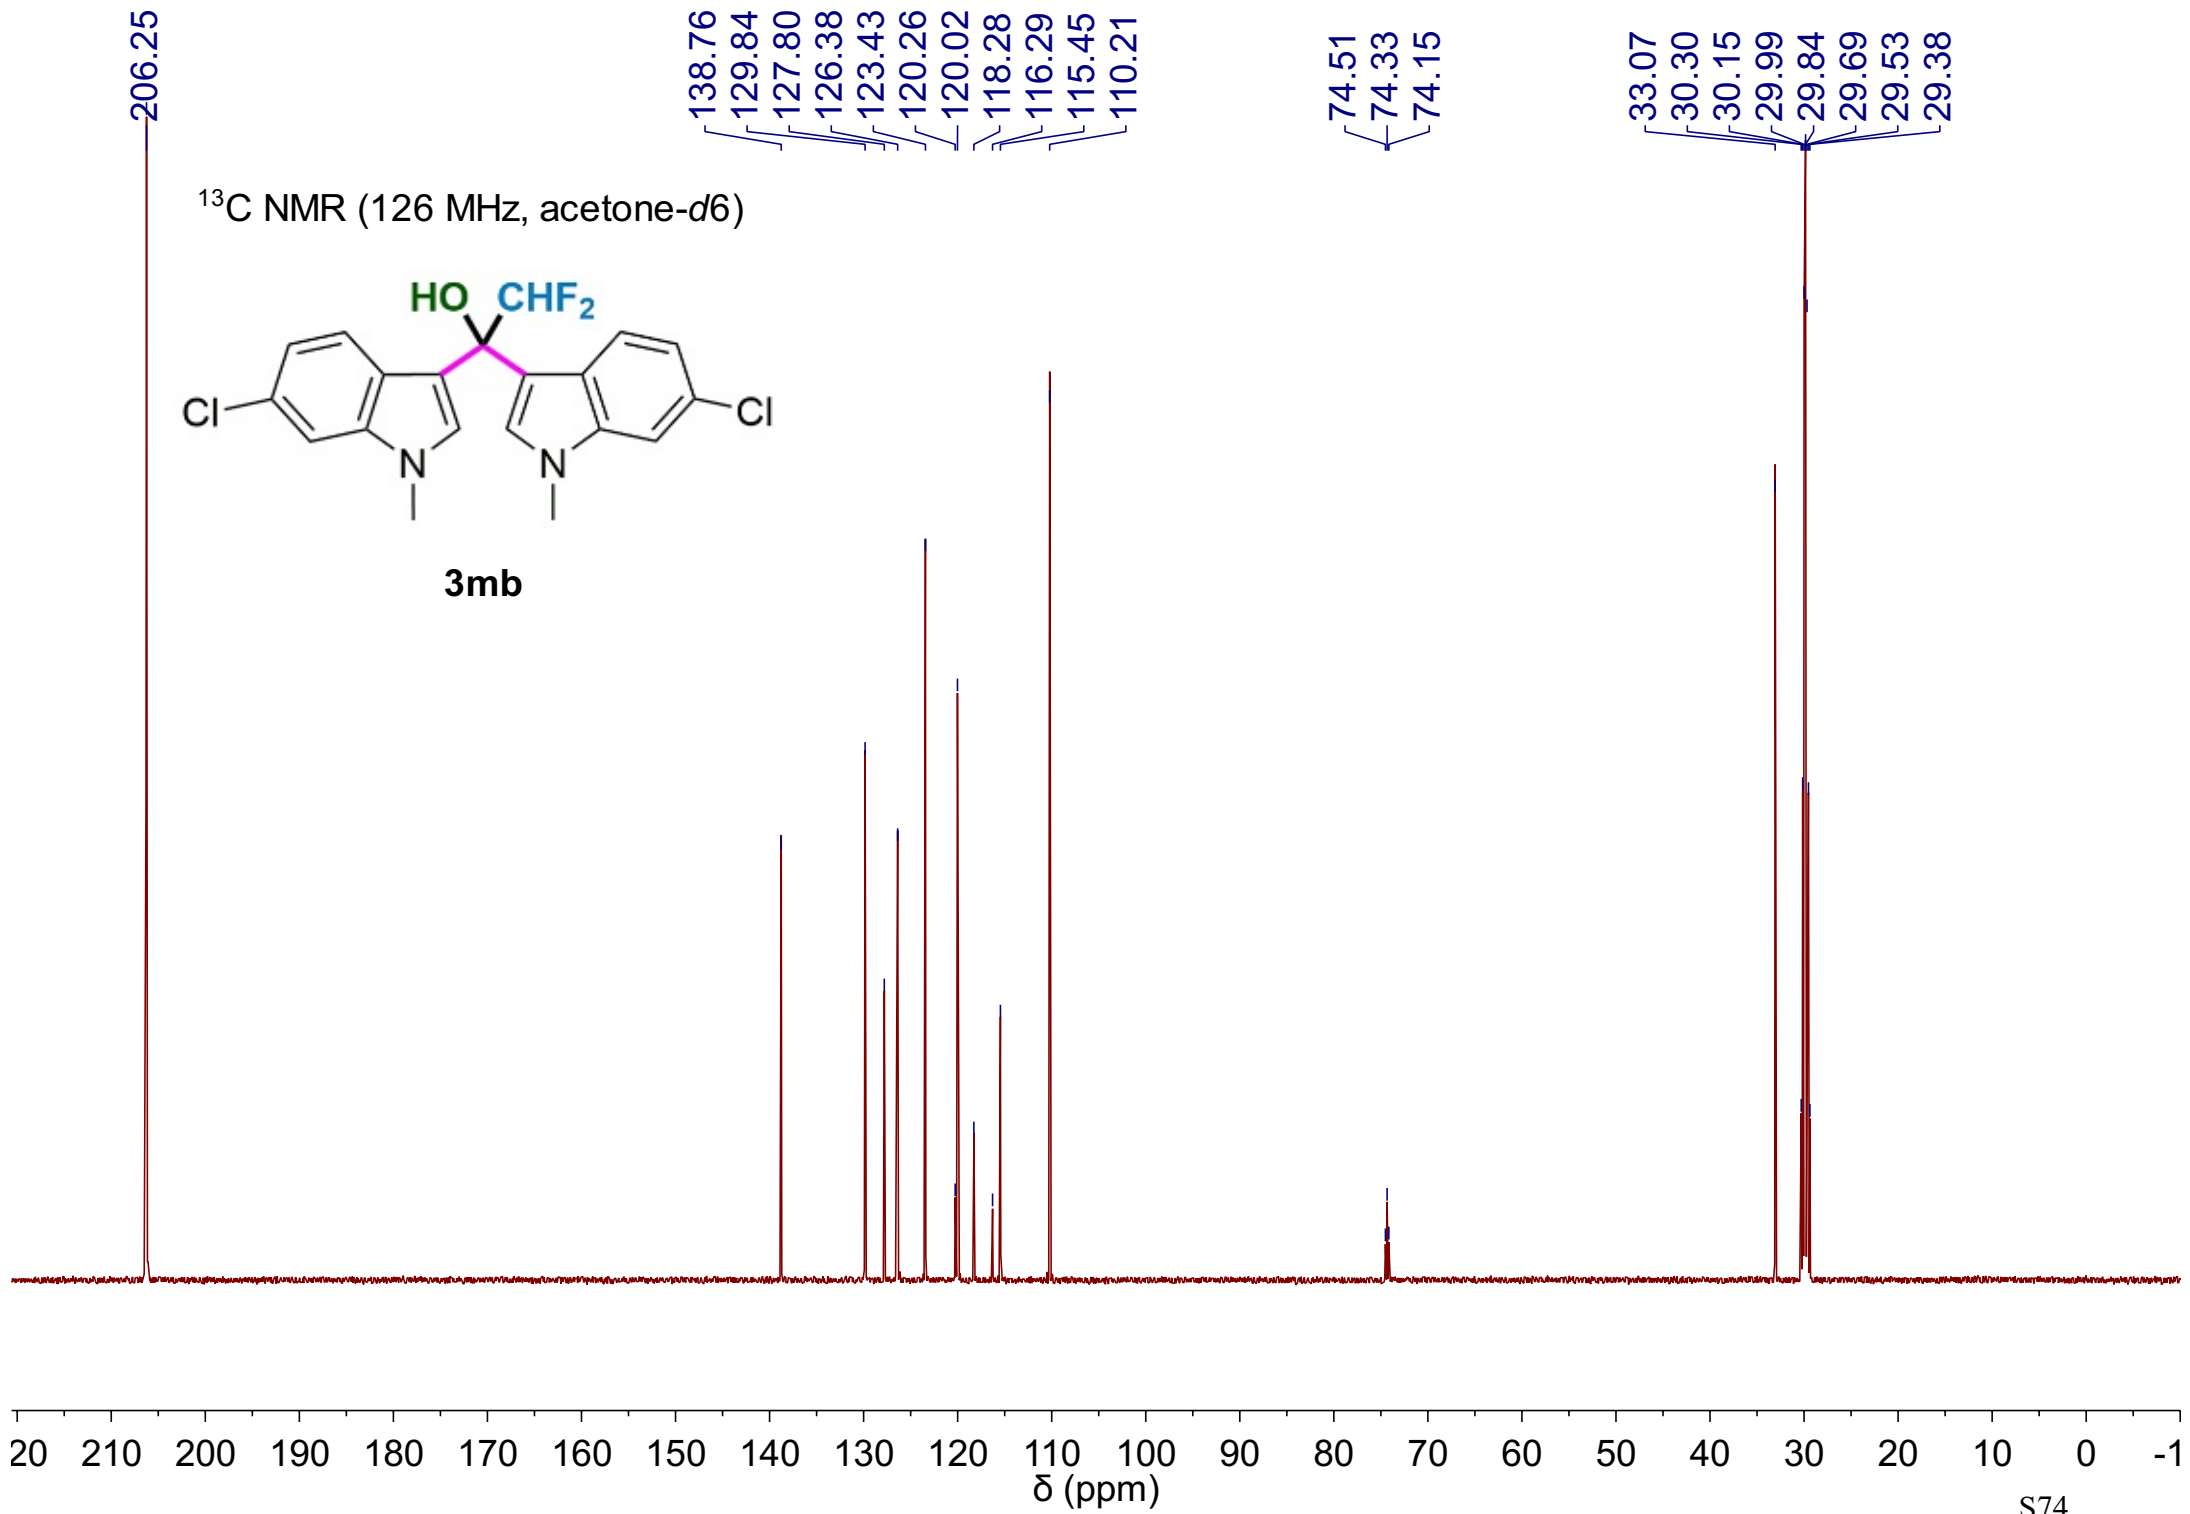

$^{19}\text{F}$  NMR (471 MHz, acetone- $d_6$ )

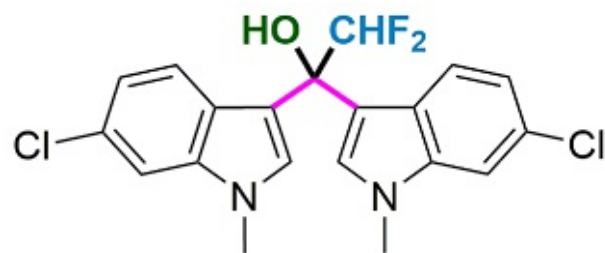

**3mb**

-126.44  
-126.49  
-126.56  
-126.61

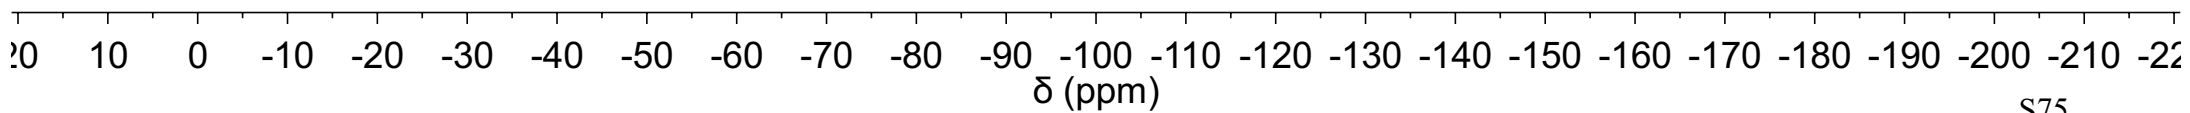

<sup>1</sup>H NMR (500 MHz, acetone-*d*<sub>6</sub>)

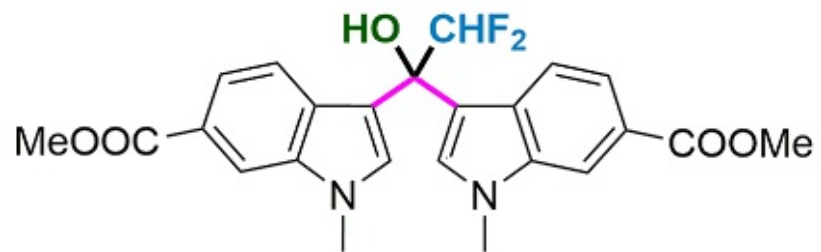

**3pb**

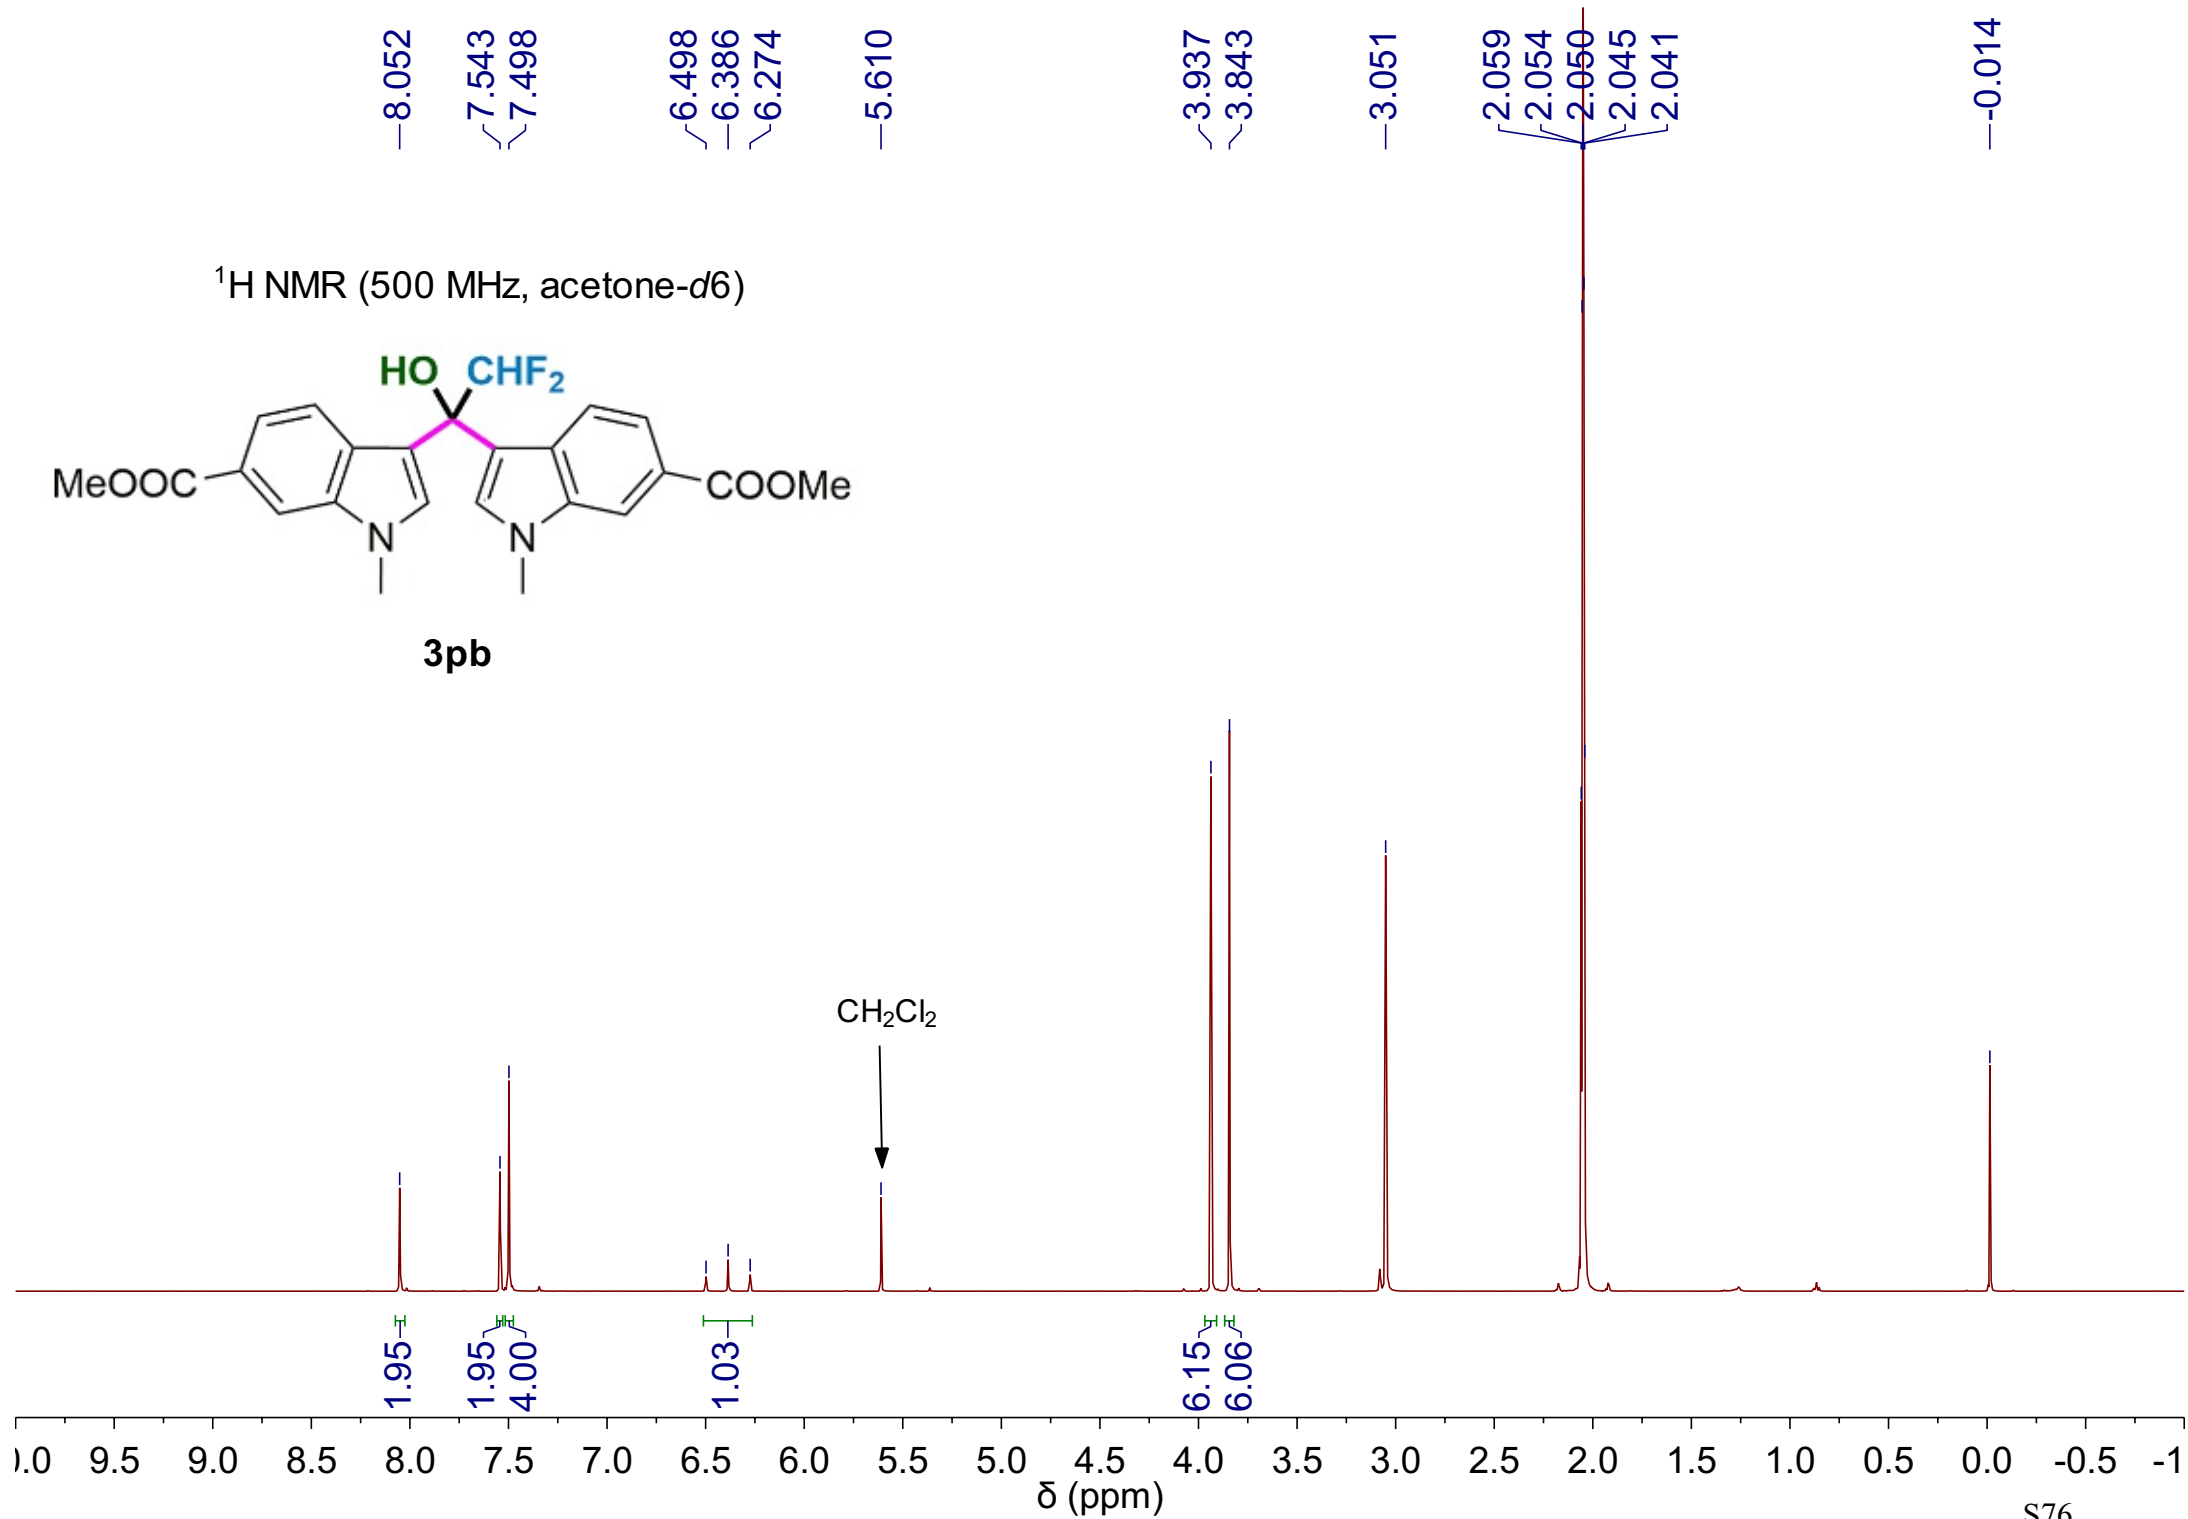

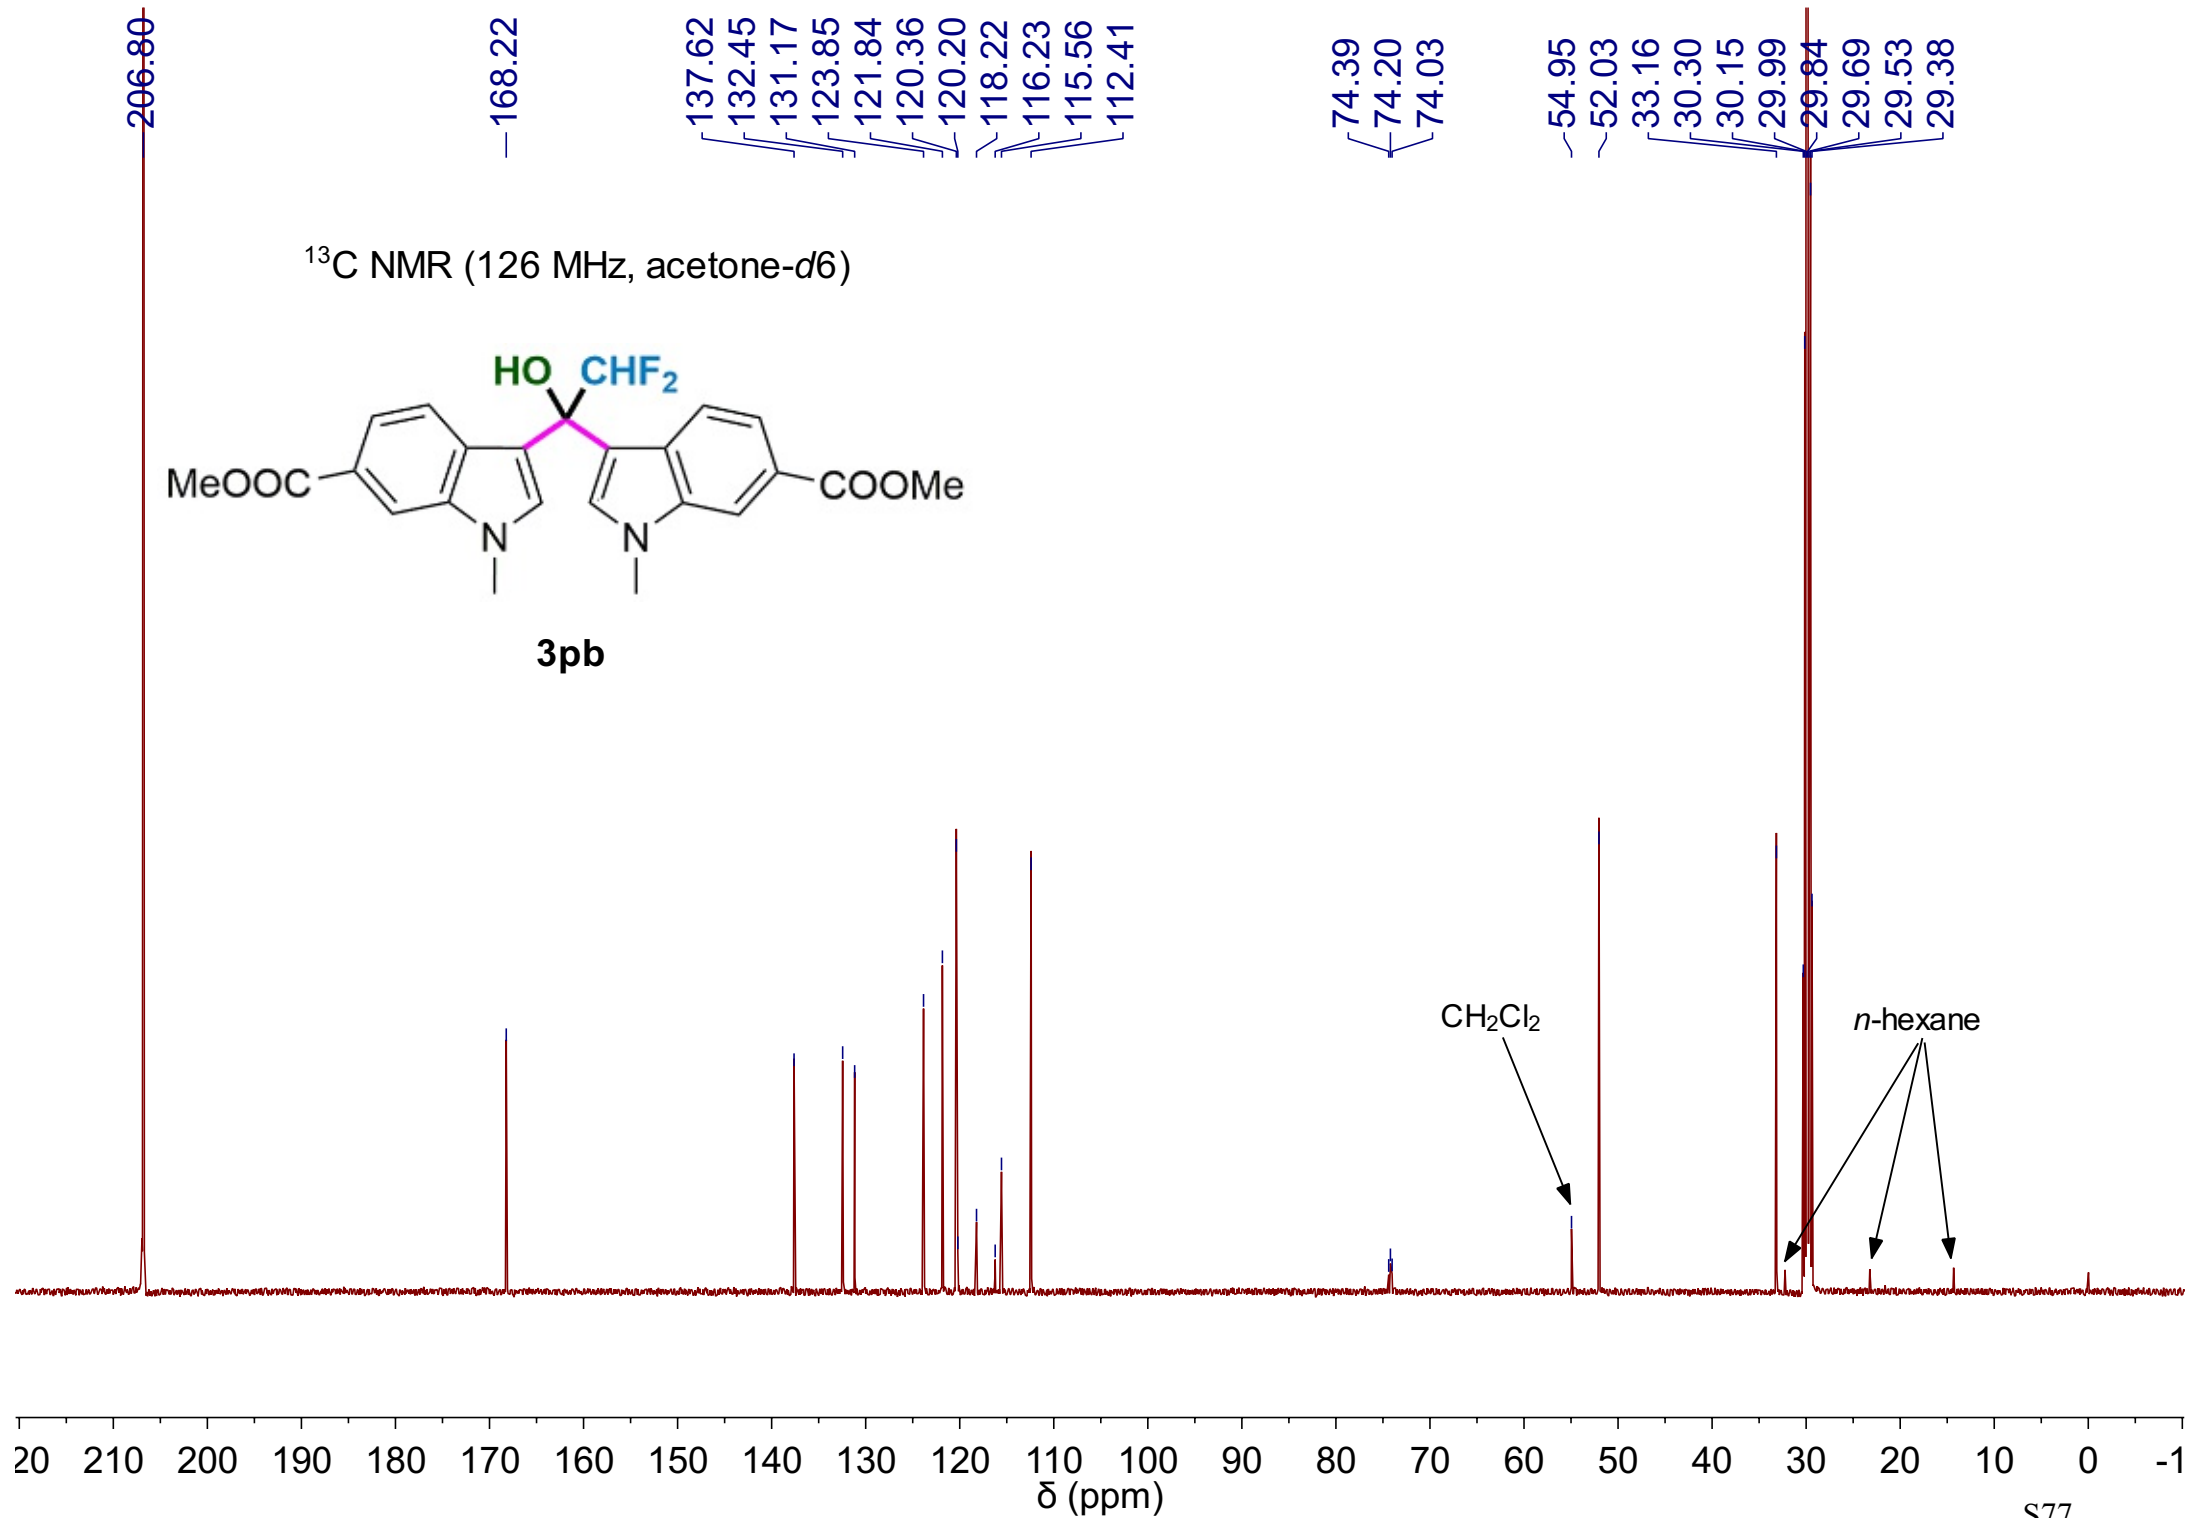

$^{19}\text{F}$  NMR (471 MHz, acetone- $d_6$ )

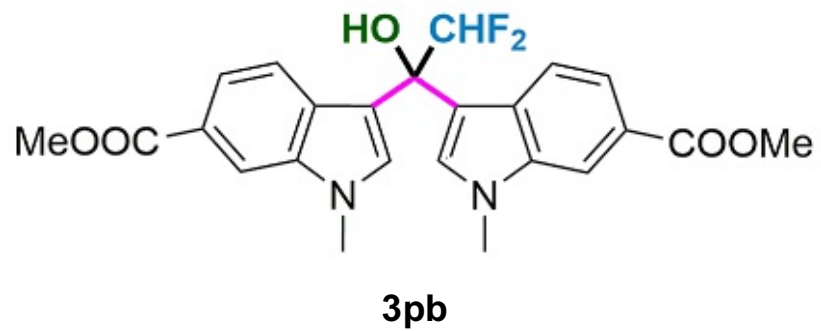

-126.58  
-126.70

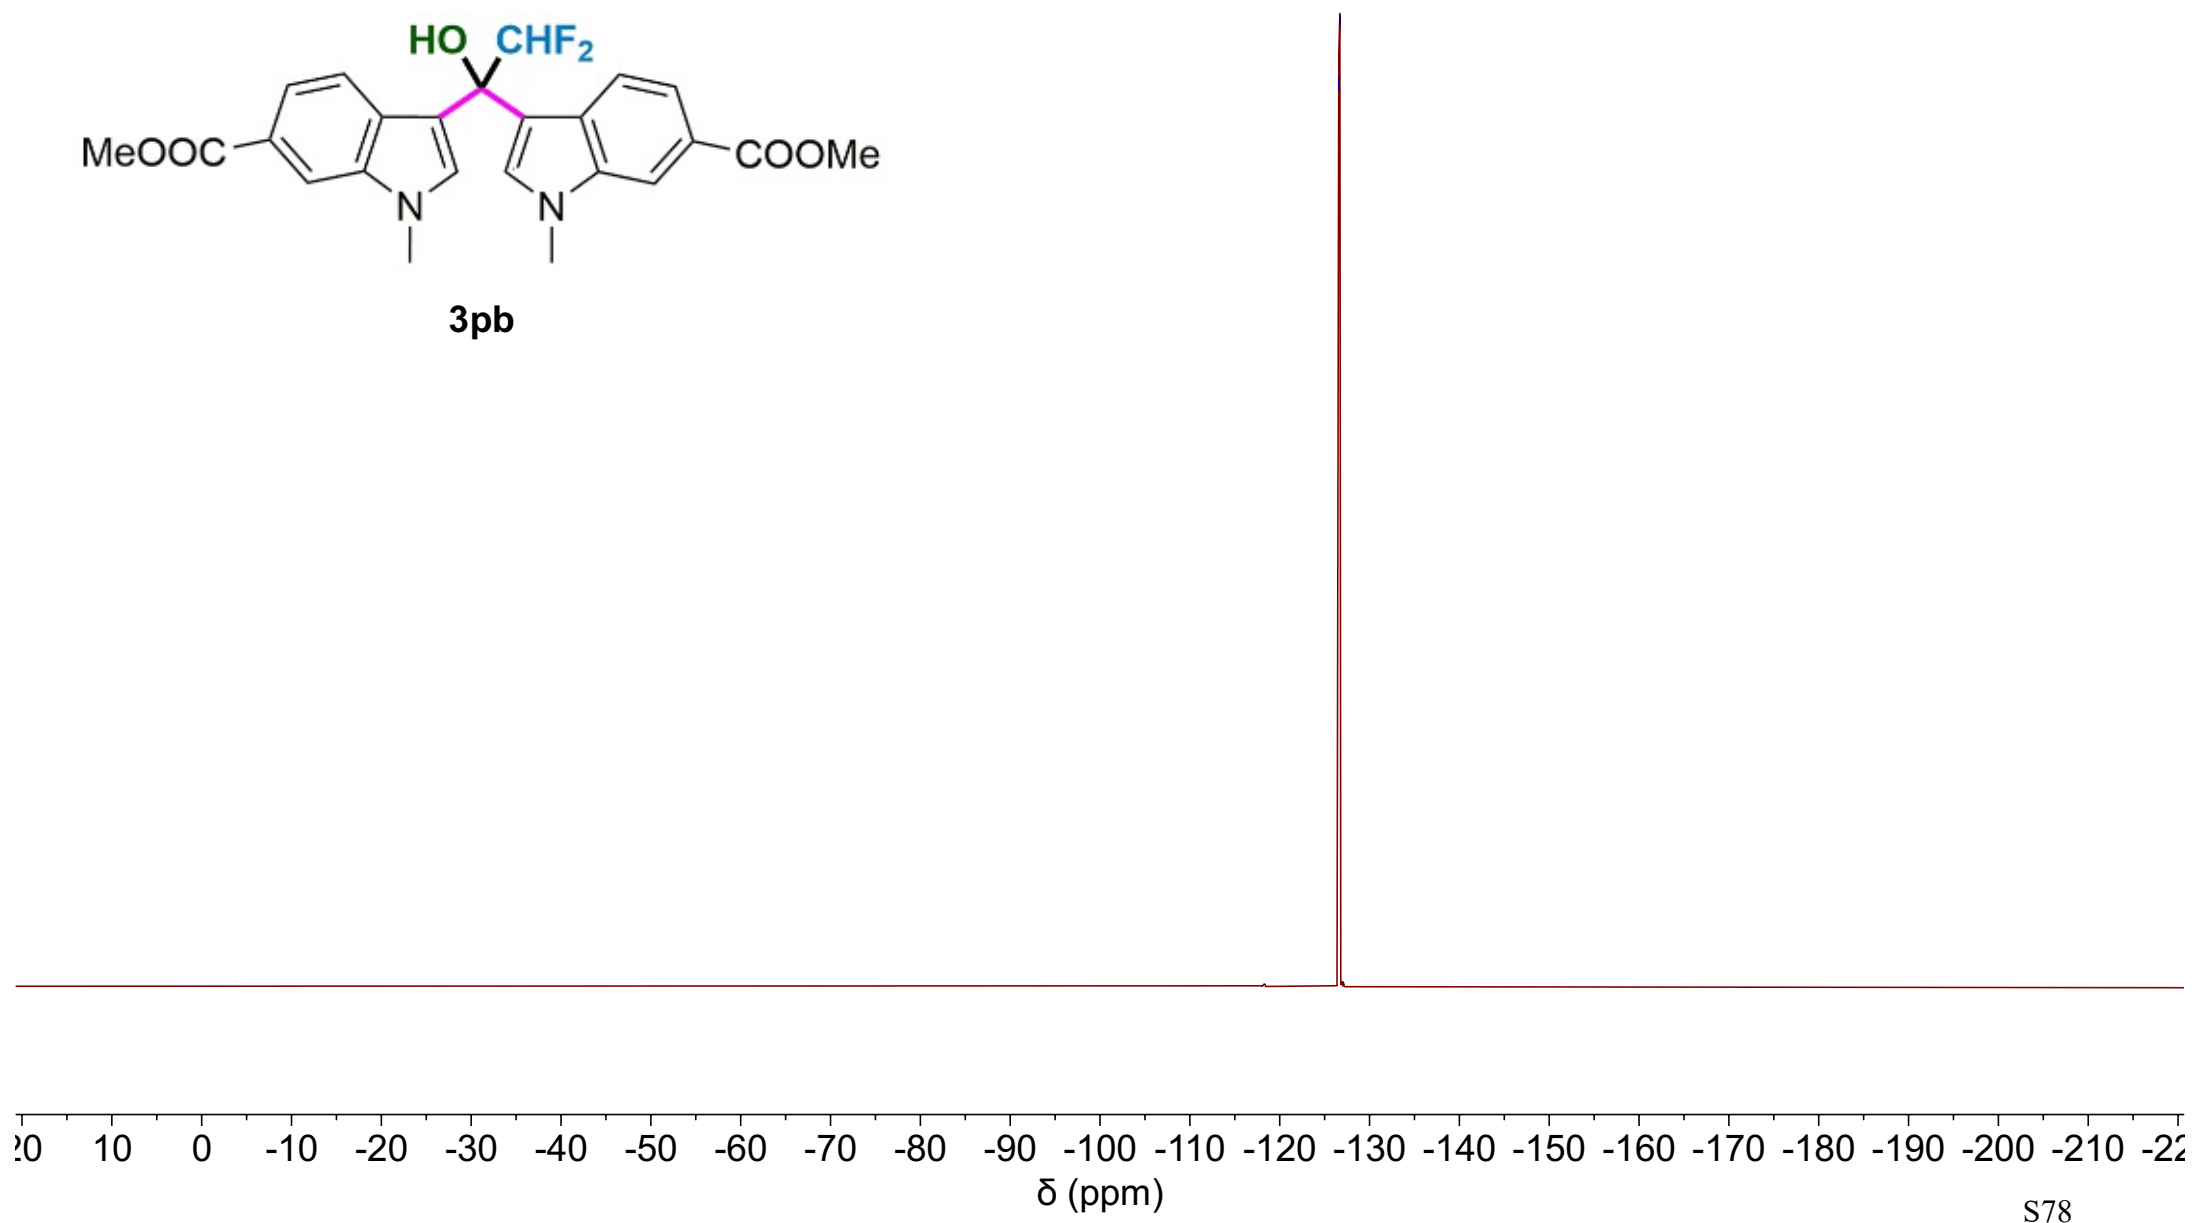

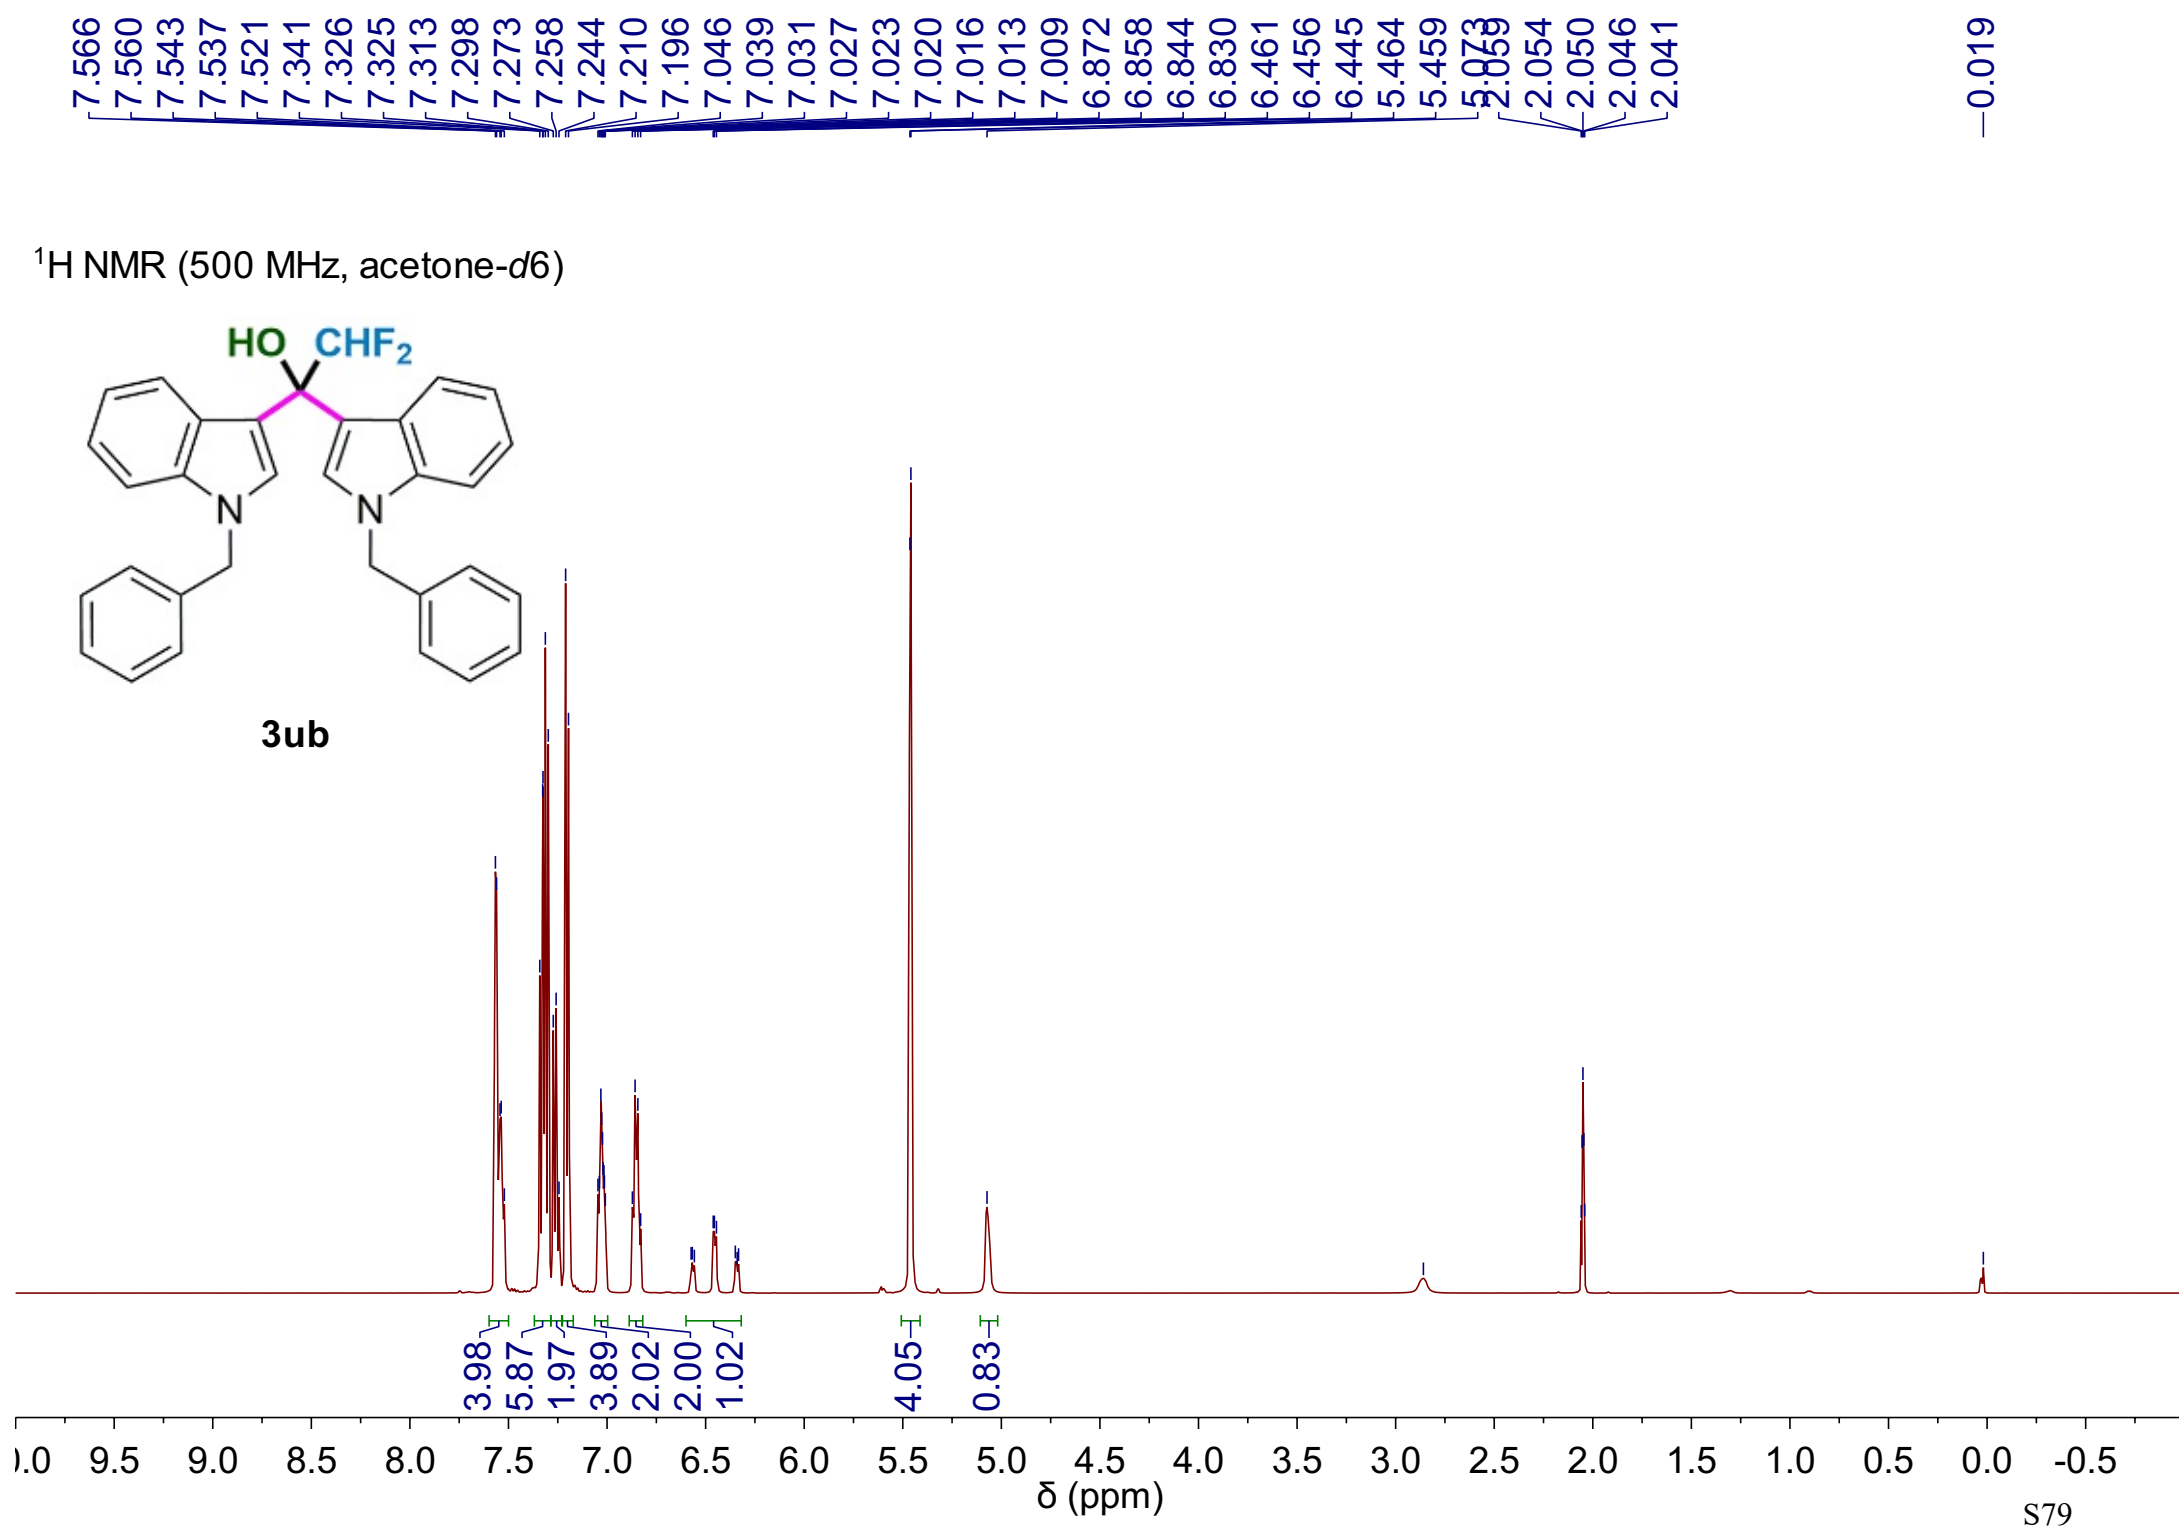



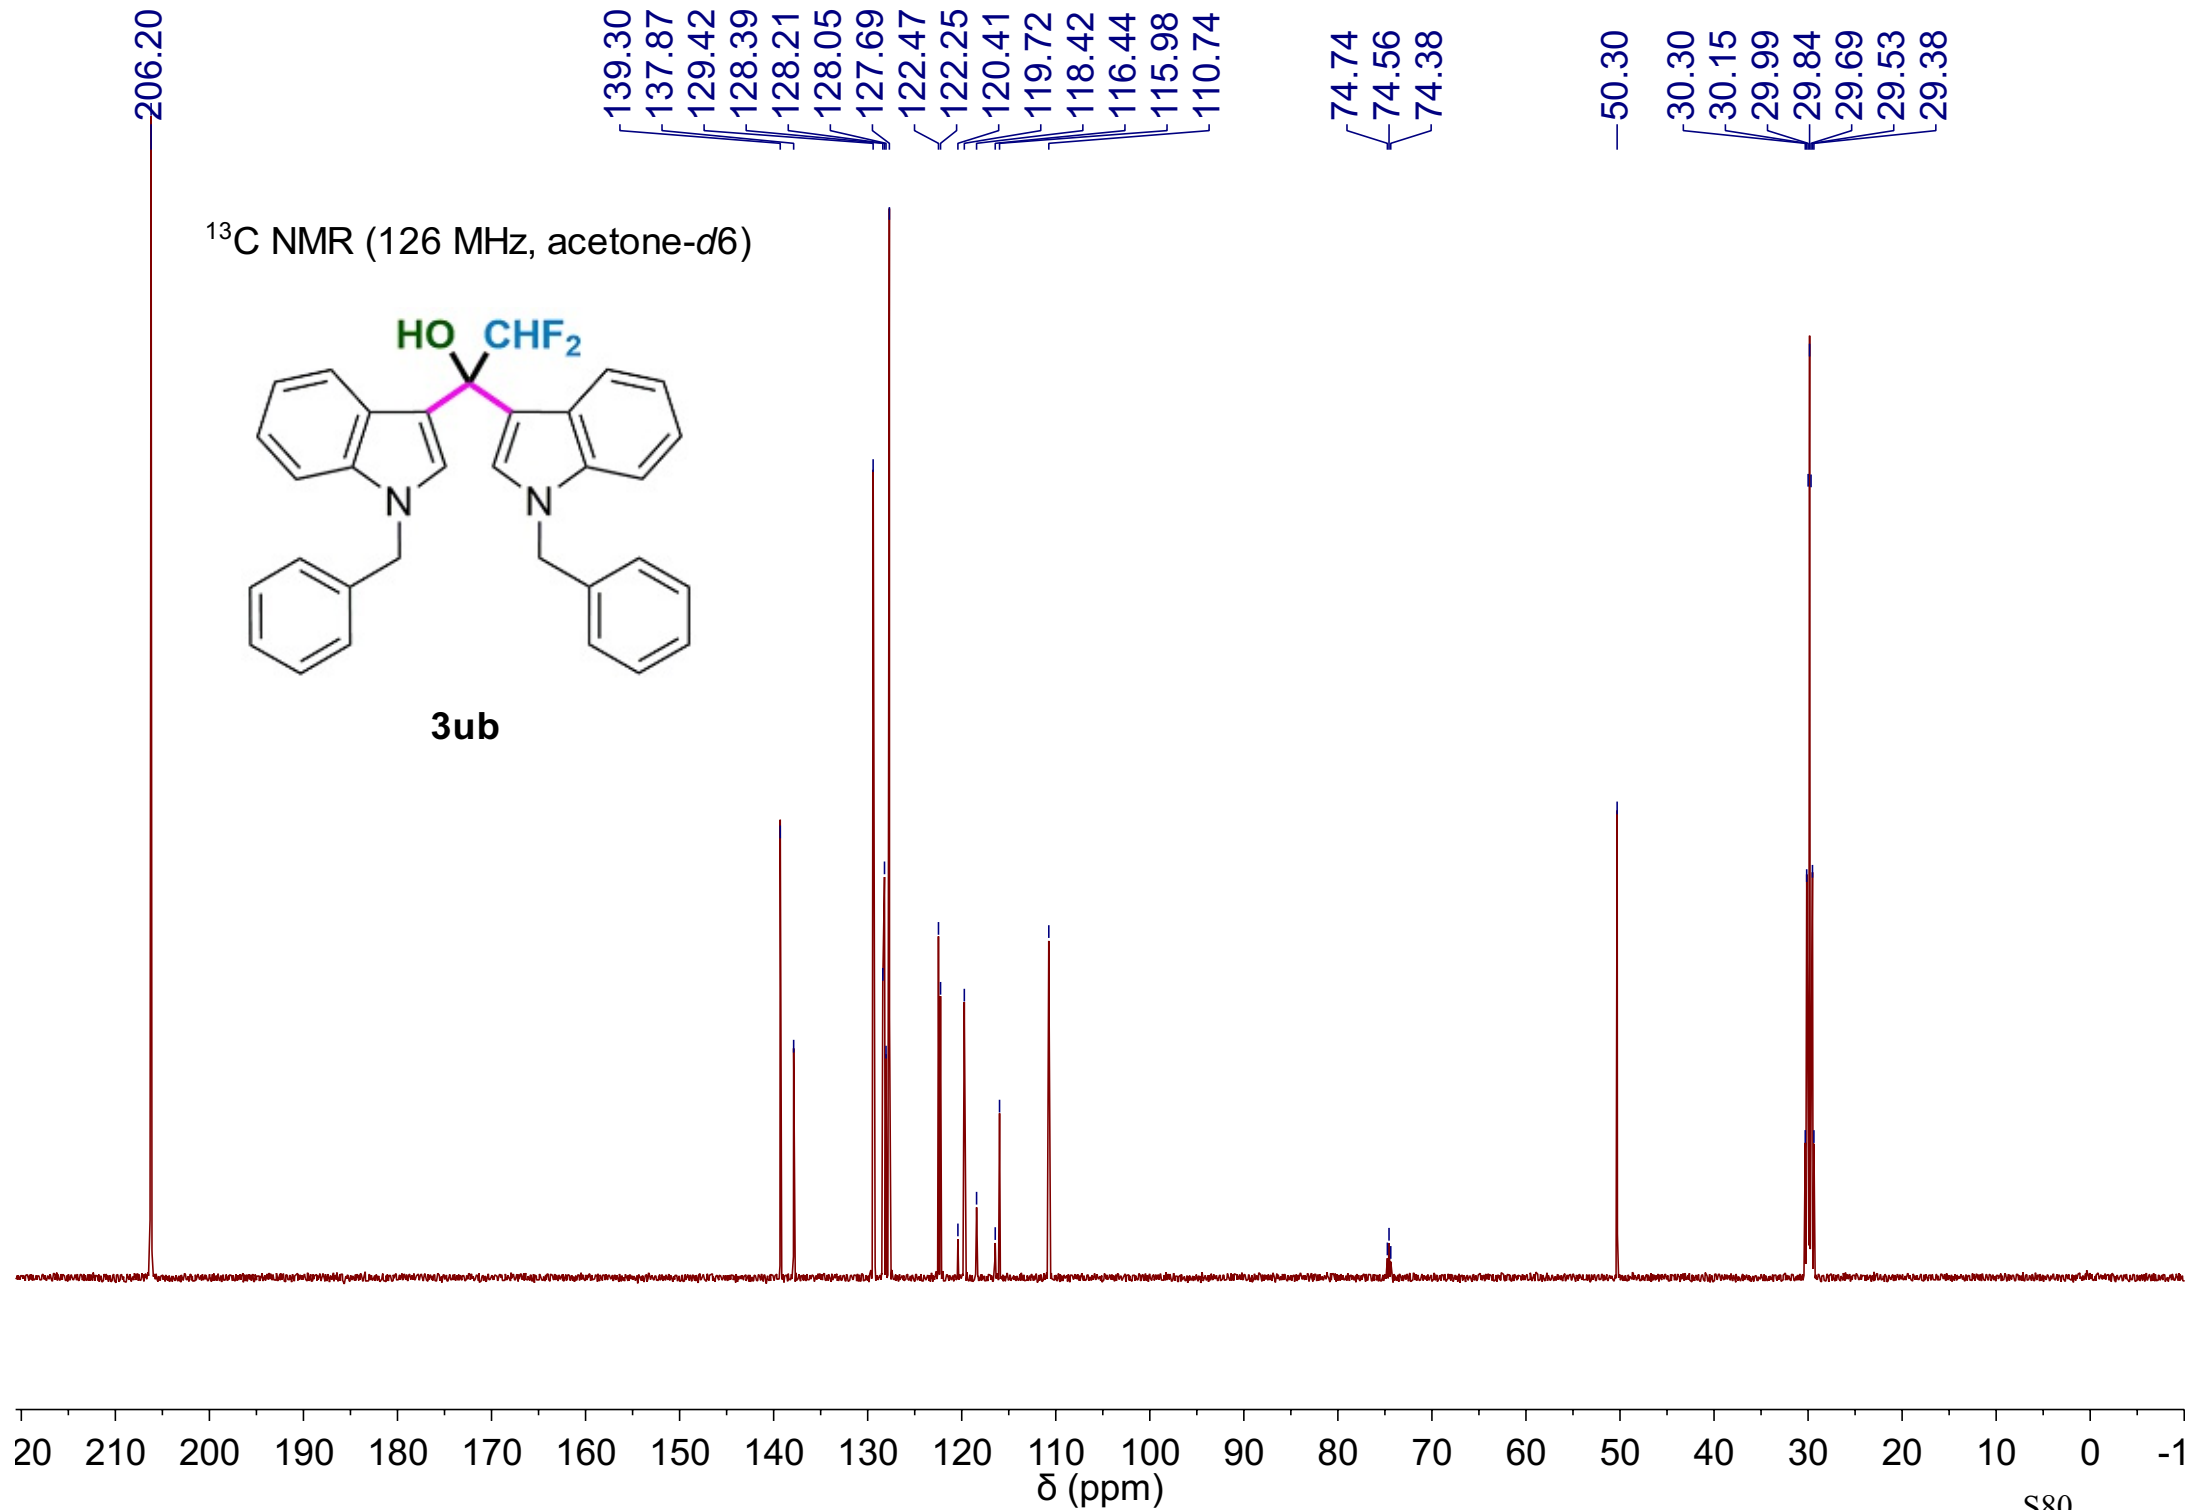

$^{19}\text{F}$  NMR (471 MHz, acetone- $d_6$ )

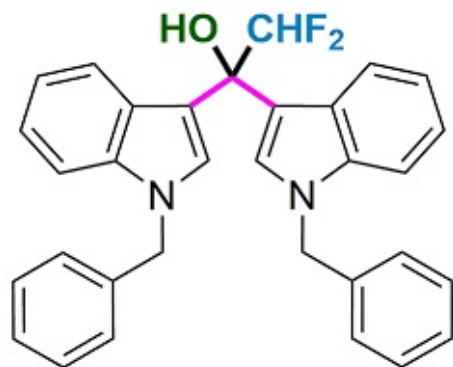

**3ub**

-126.43  
-126.50  
-126.55  
-126.62

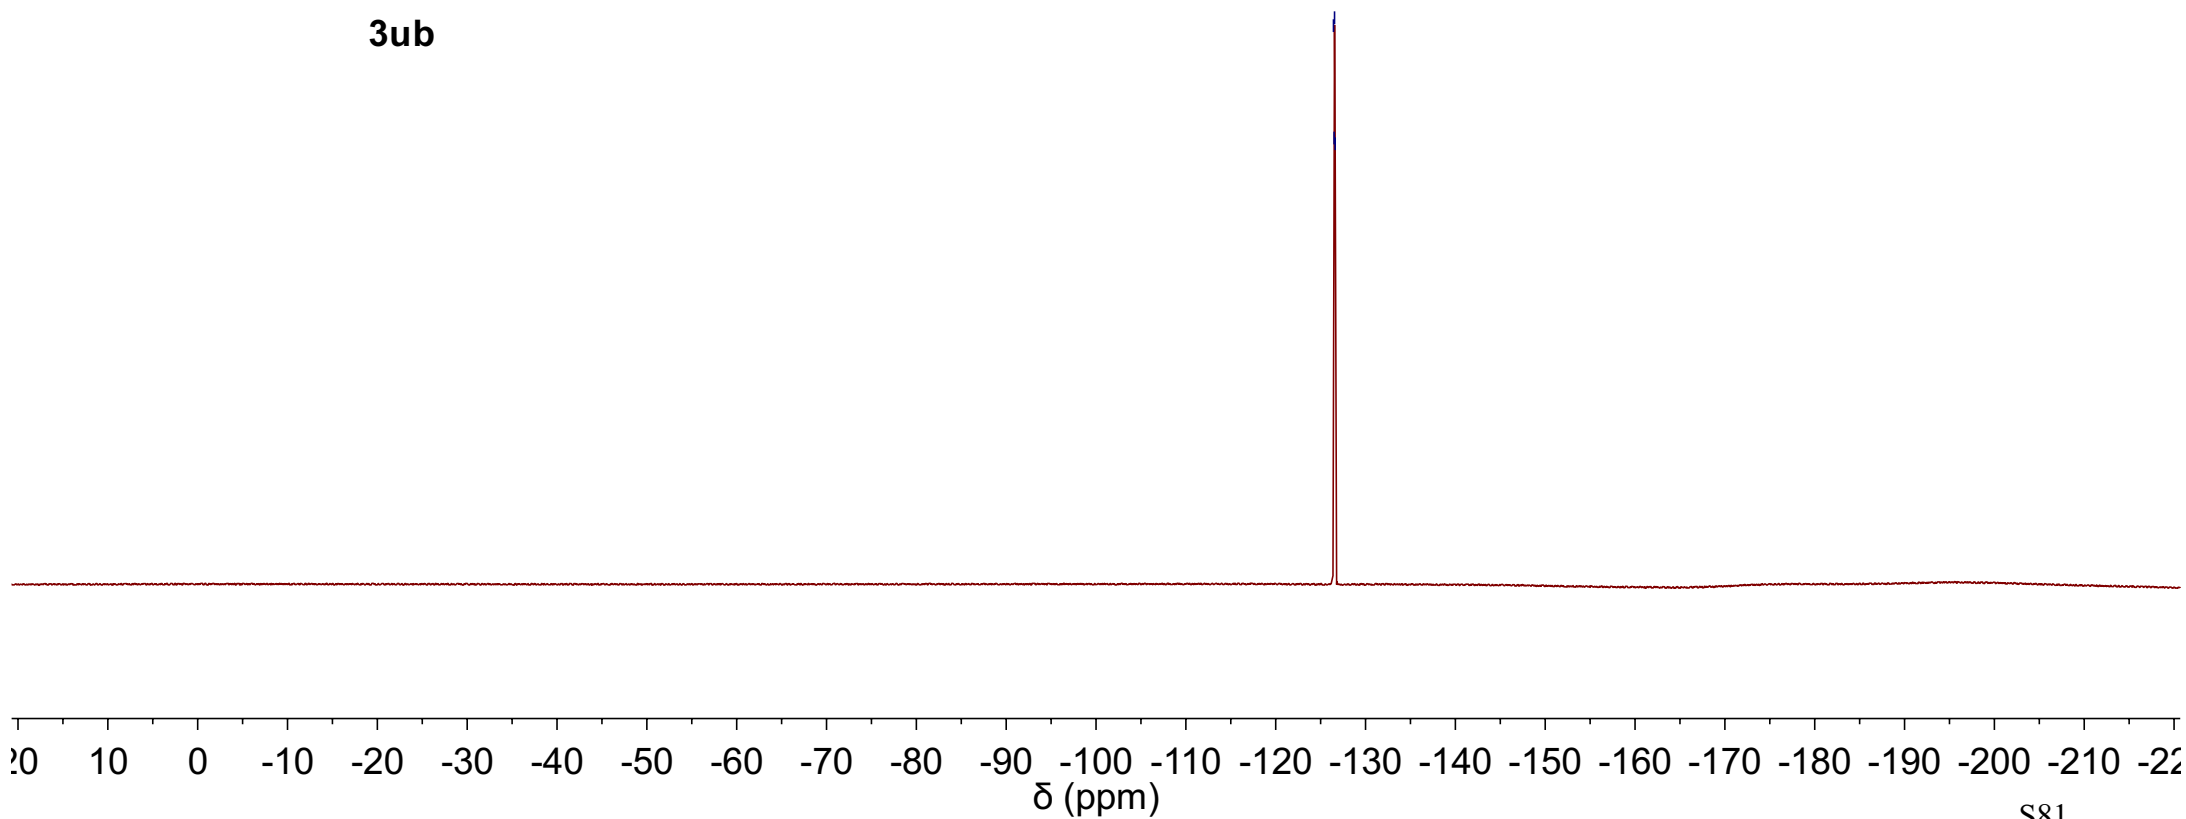

7.447  
7.430  
7.366  
7.334  
7.317  
7.075  
7.073  
7.059  
7.044  
7.043  
6.827  
6.826  
6.812  
6.810  
6.797  
6.796

3.839

3.047

2.059

2.055

2.050

2.046

2.042

-0.012

<sup>1</sup>H NMR (500 MHz, acetone-*d*<sub>6</sub>)

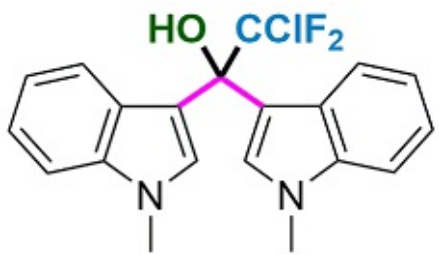

**3ac**

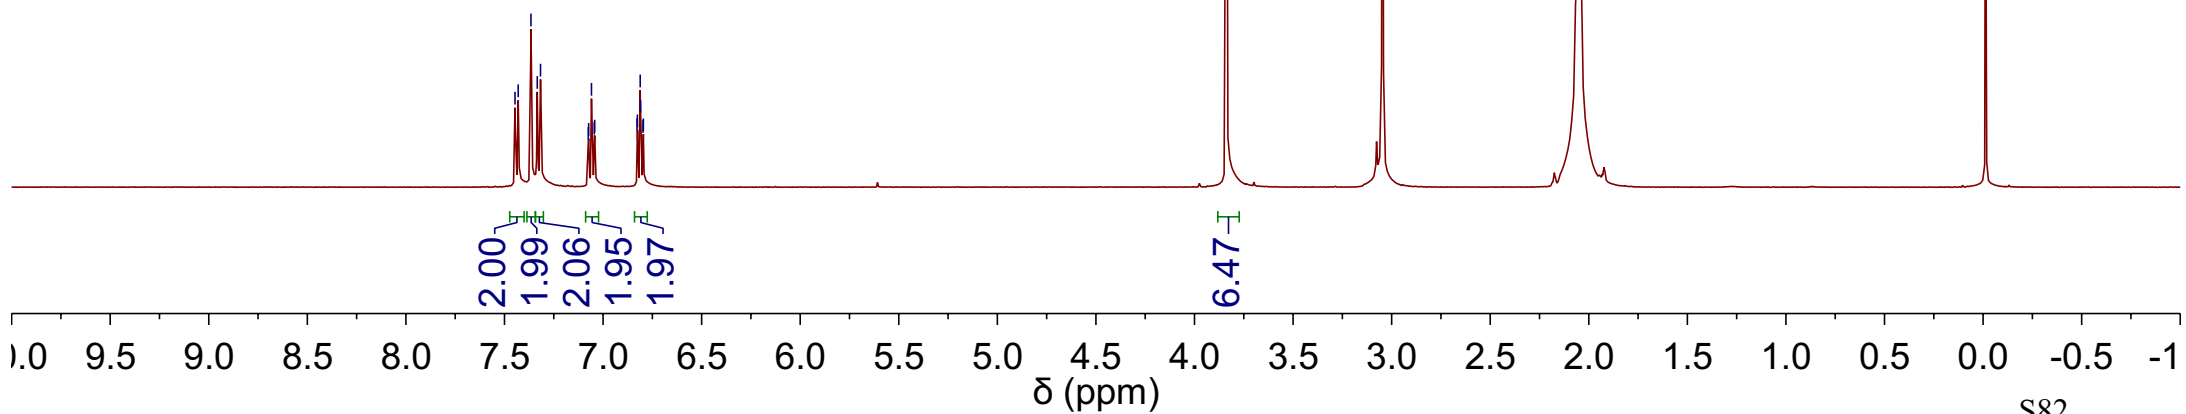

206.79

<sup>13</sup>C NMR (126 MHz, acetone-*d*<sub>6</sub>)

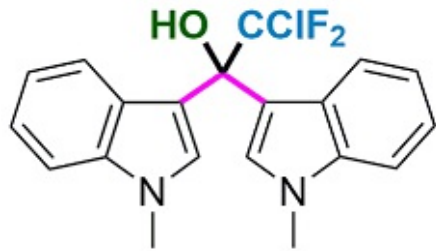

**3ac**

138.09  
136.35  
133.94  
131.53  
129.44  
129.42  
129.40  
127.82  
122.49  
122.04  
119.63  
114.40  
110.08

79.89  
79.68  
79.47

32.93  
30.30  
30.15  
29.99  
29.84  
29.69  
29.53  
29.38

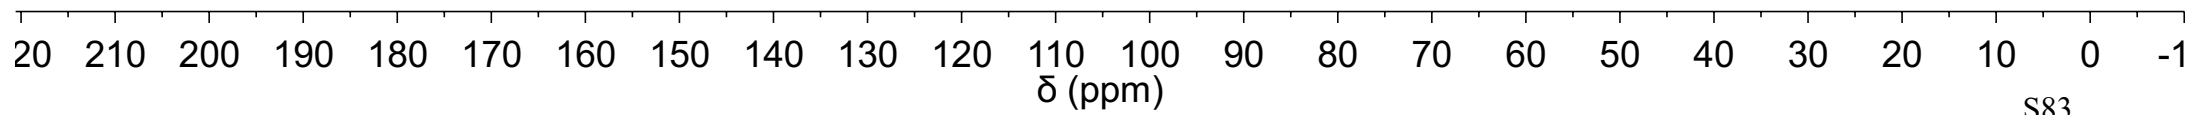

$^{19}\text{F}$  NMR (471 MHz, acetone- $d_6$ )

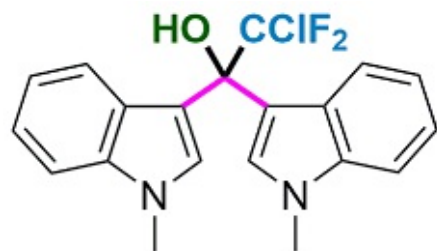

**3ac**

---60.42

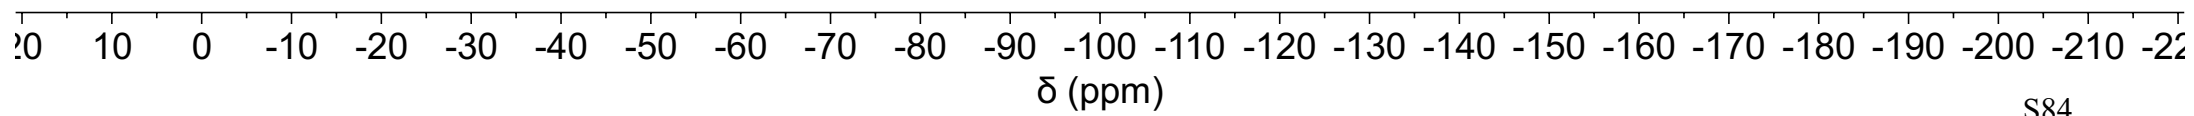

7.499  
7.482  
7.409  
7.329  
7.312  
7.092  
7.090  
7.078  
7.076  
7.074  
7.062  
7.059  
6.855  
6.853  
6.841  
6.839  
6.837  
6.825  
6.823  
-5.651

<sup>1</sup>H NMR (500 MHz, acetone-*d*<sub>6</sub>)

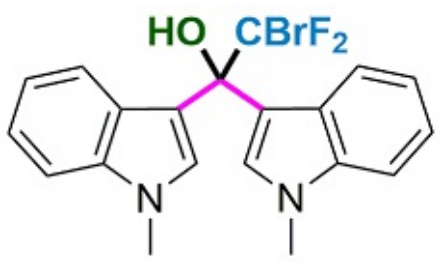

**3ad**

3.802  
-3.118  
2.058  
2.054  
2.050  
2.045  
2.041  
-0.022

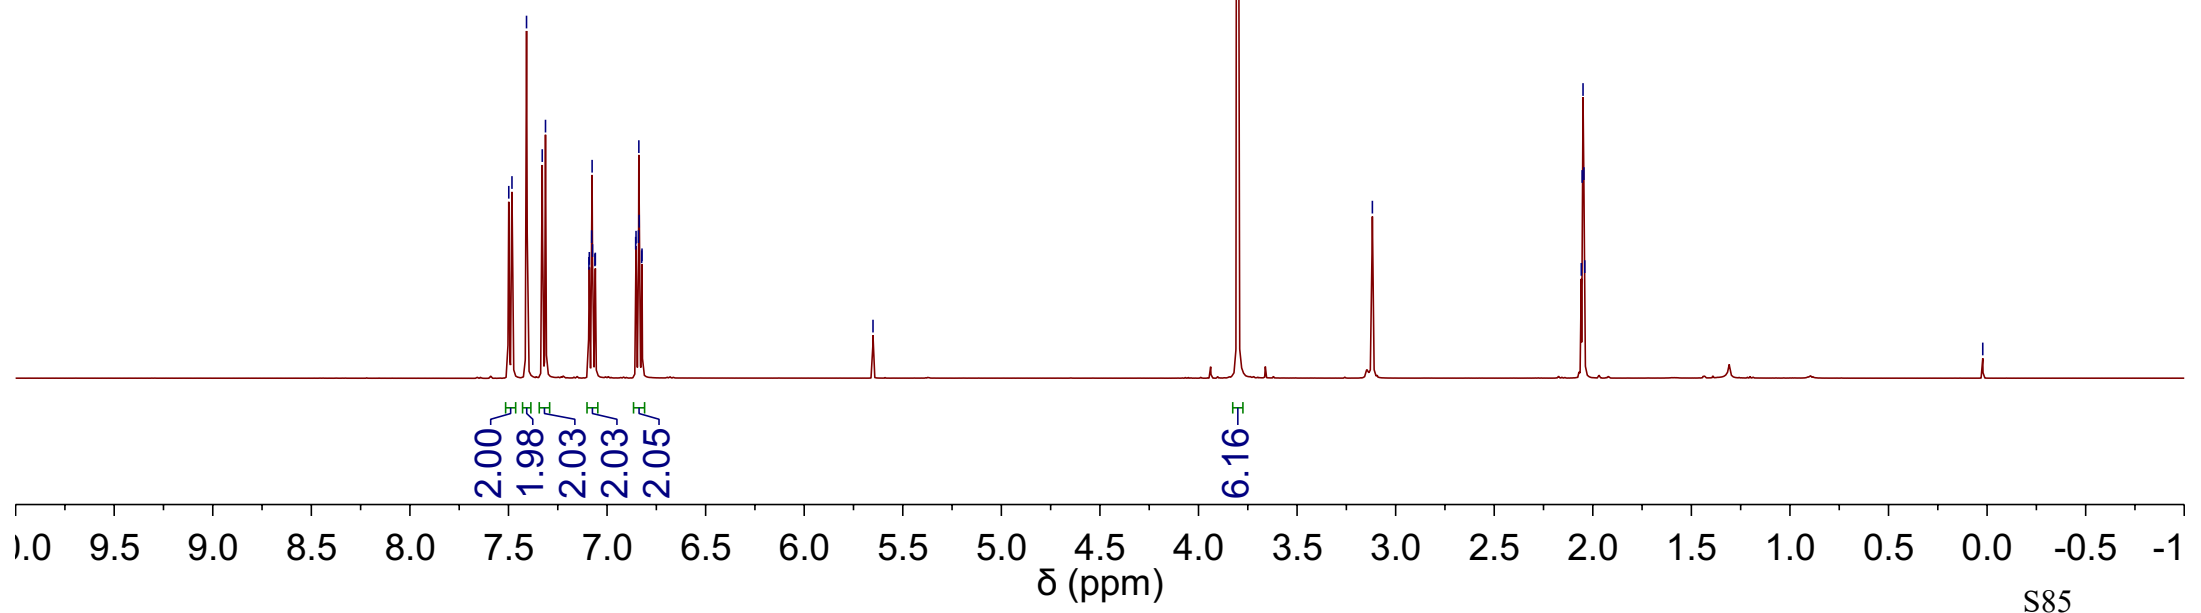

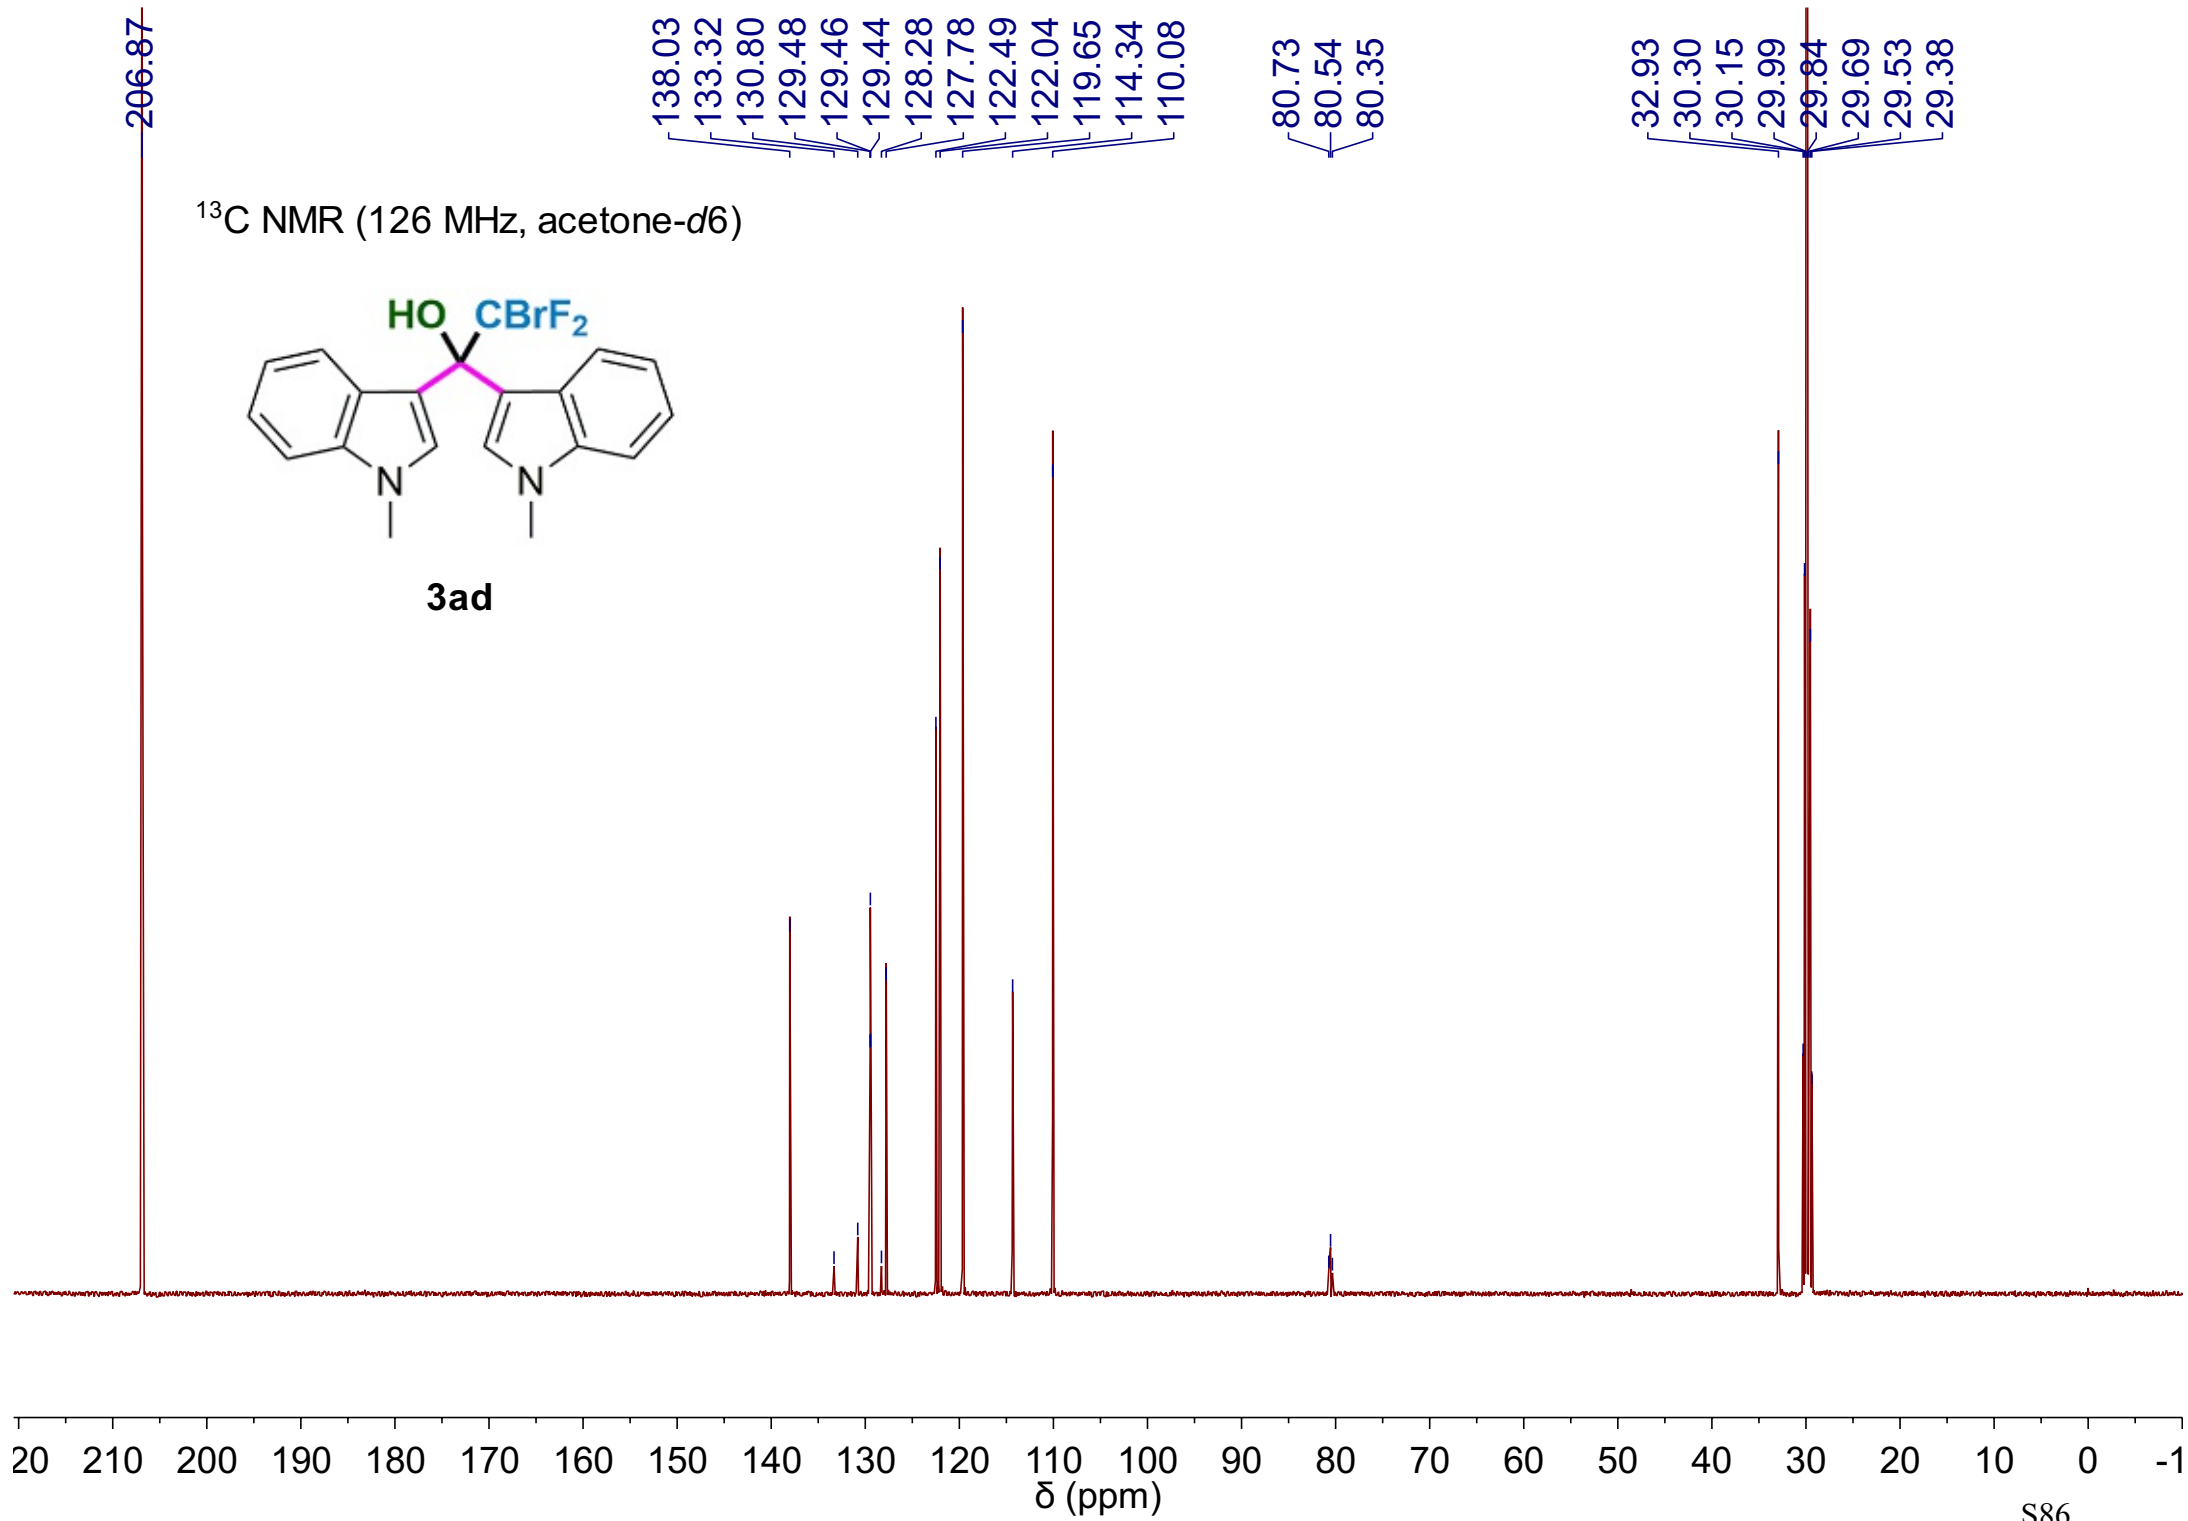

$^{19}\text{F}$  NMR (471 MHz, acetone- $d_6$ )

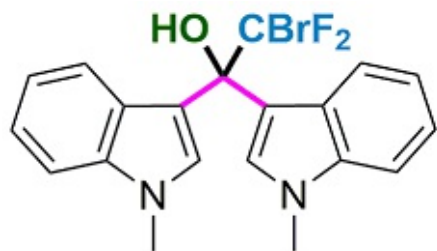

**3ad**

---53.09

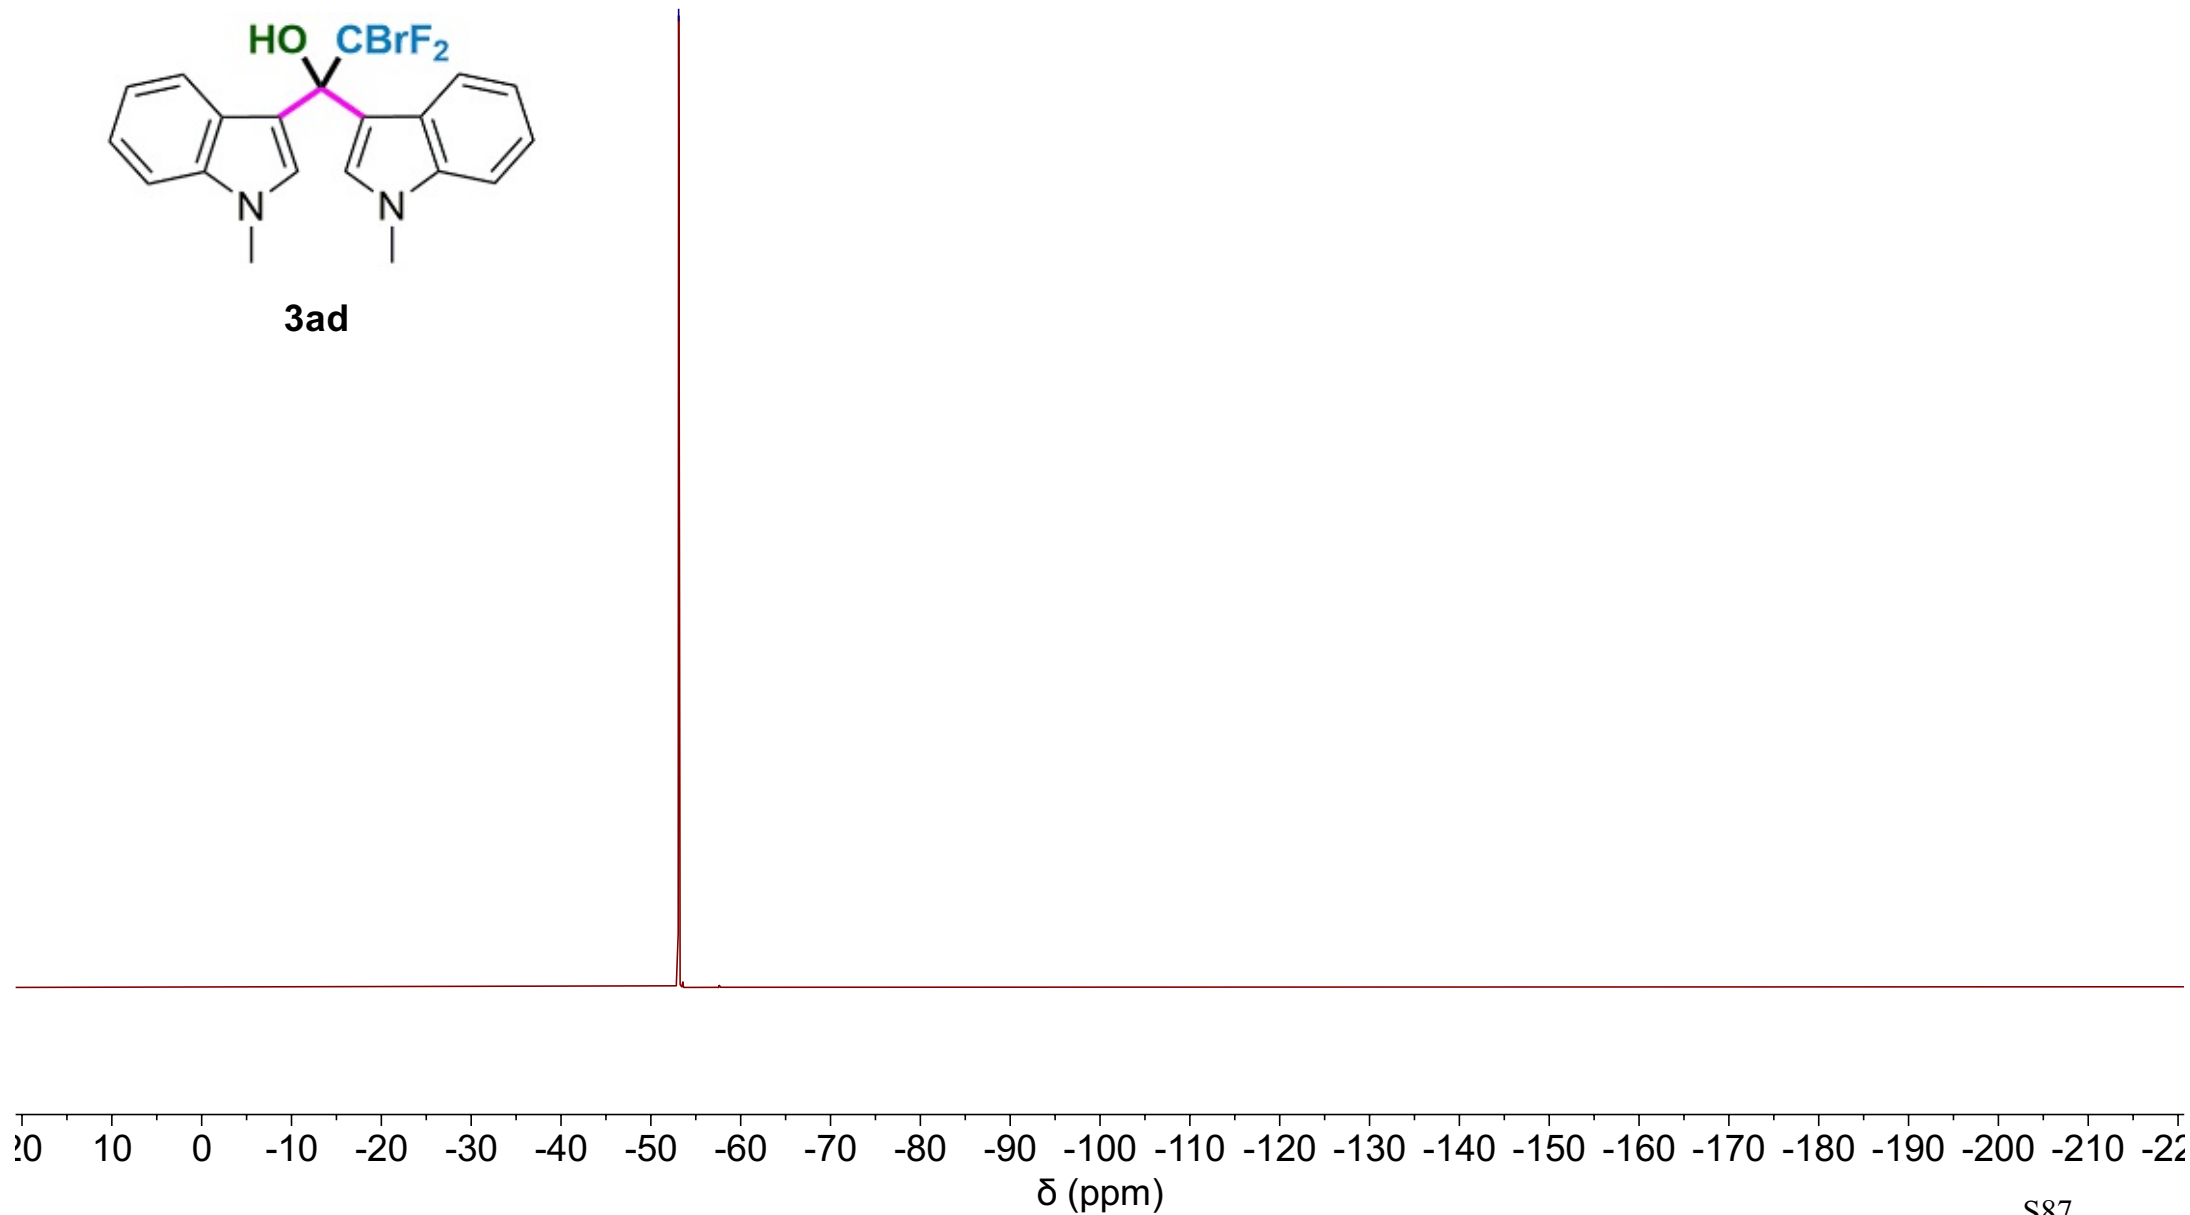



7.465  
7.436  
7.420  
7.327  
7.310  
7.066  
7.064  
7.050  
7.036  
7.034  
6.813  
6.812  
6.797  
6.783  
6.781

3.840

3.092

2.059  
2.055  
2.050  
2.046  
2.041

0.002

<sup>1</sup>H NMR (500 MHz, acetone-*d*<sub>6</sub>)

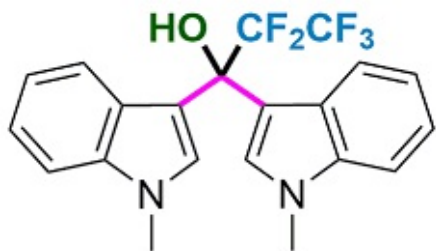

**3ae**

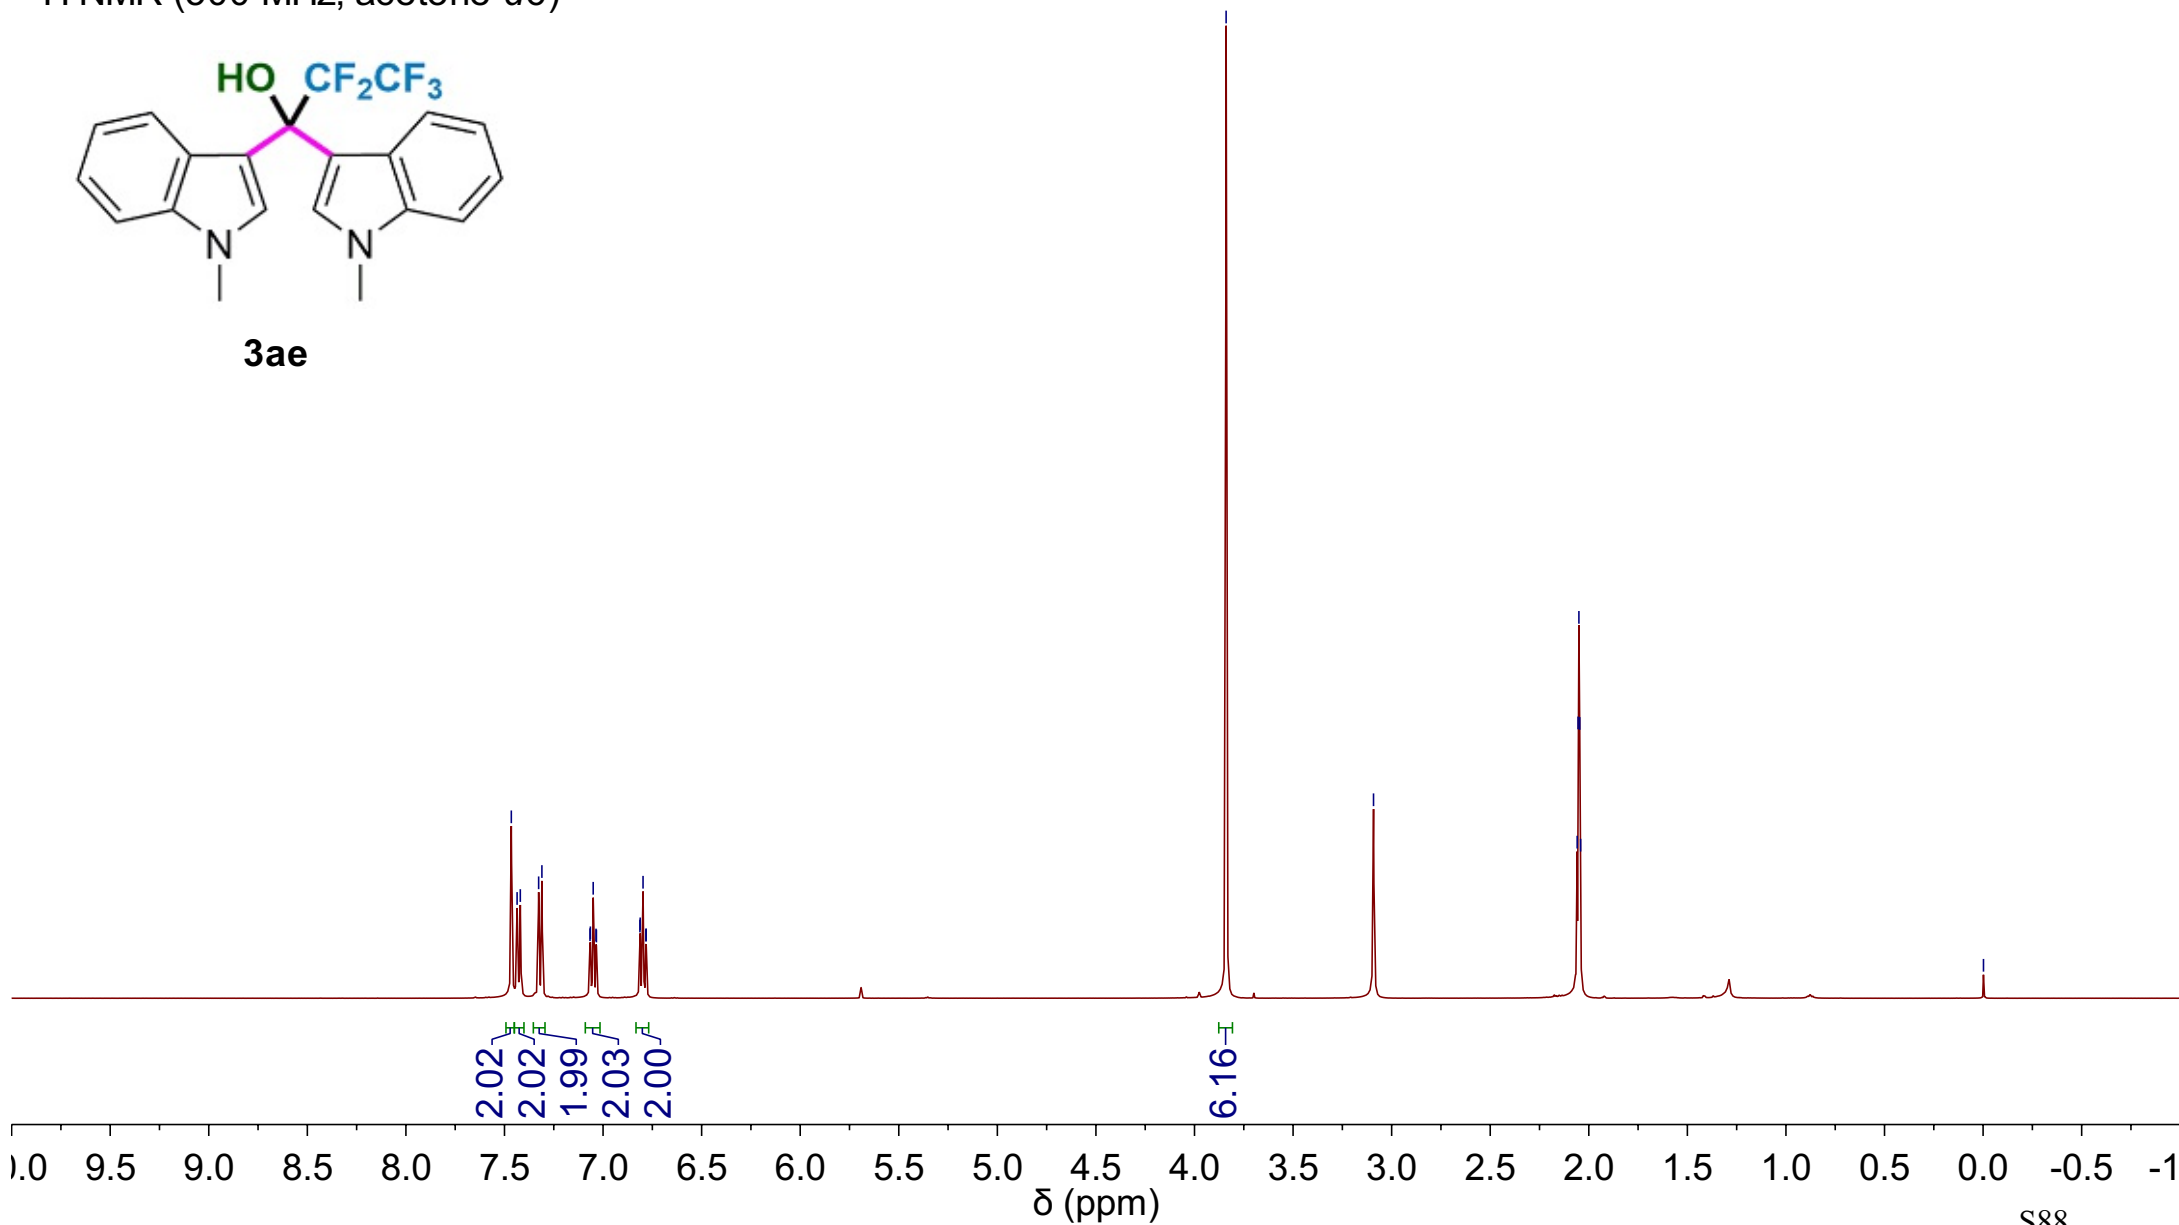



$^{19}\text{F}$  NMR (471 MHz, acetone- $d_6$ )

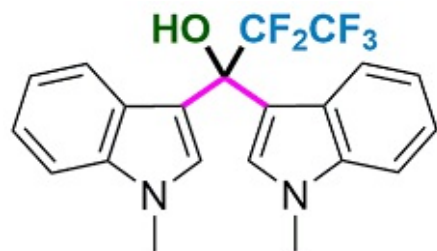

**3ae**

--77.64

--117.58

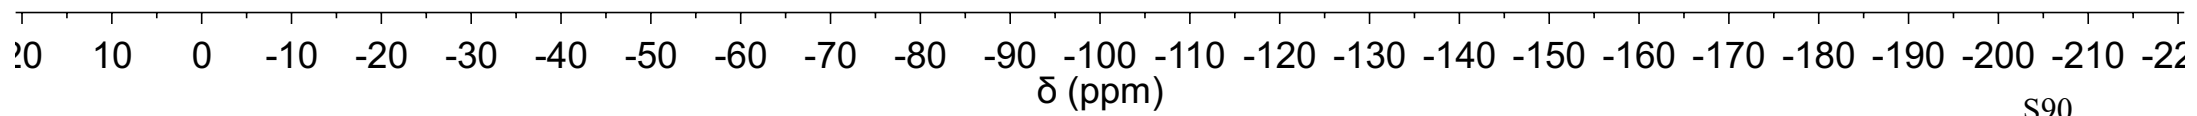

8.423  
8.418  
8.415  
8.413  
8.406  
8.401  
8.398  
8.394  
7.914  
7.911  
7.411  
7.406  
7.404  
7.402  
7.396  
7.394  
7.387  
7.385  
7.260

-3.917

-1.565

-0.003

$^1\text{H}$  NMR (500 MHz,  $\text{CDCl}_3$ )

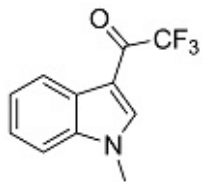

**4**

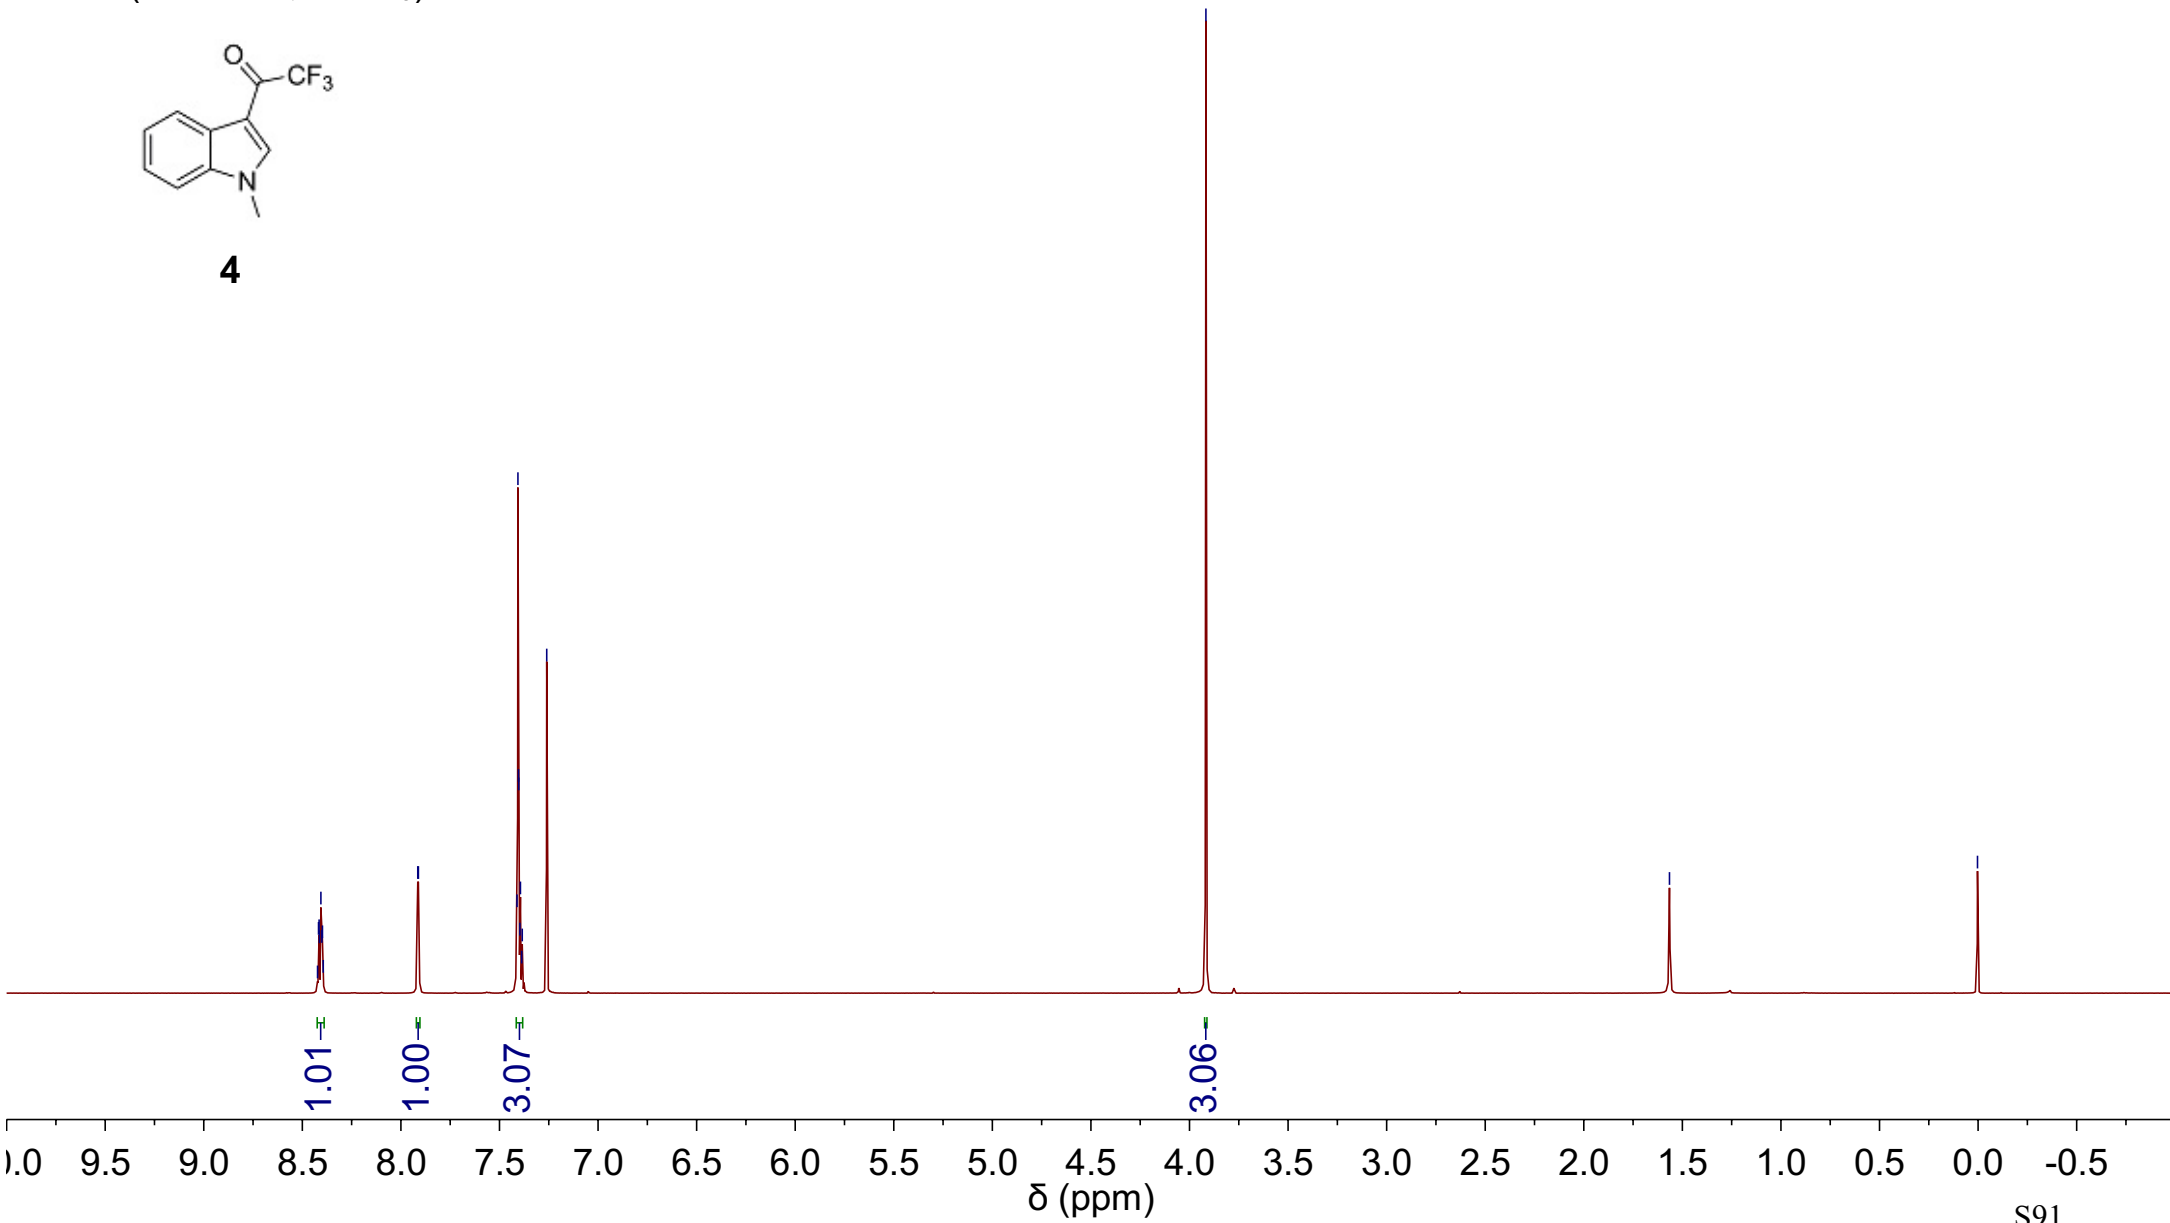

<sup>13</sup>C NMR (126 MHz, CDCl<sub>3</sub>)

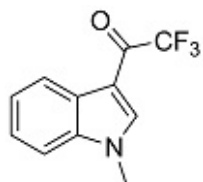

**4**

175.25  
174.98  
174.70  
174.42

138.46  
138.43  
138.39  
138.35  
137.47  
127.09  
124.77  
124.13  
122.77  
120.69  
118.38  
116.06  
113.75  
110.23  
109.60

77.41  
77.16  
76.91

-34.15

-0.13

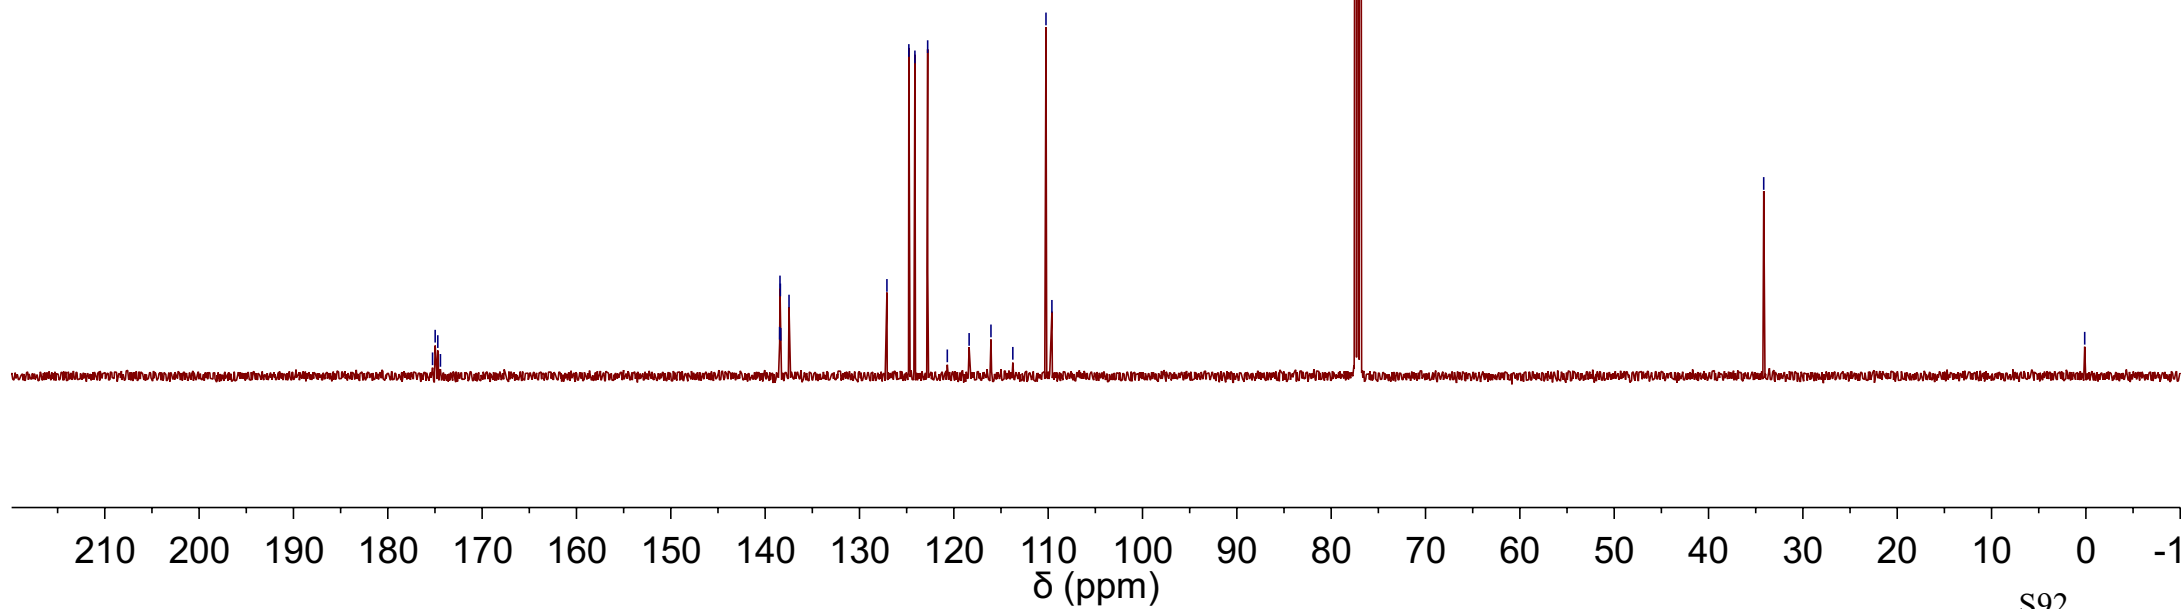

Supplement: d2ob01281b1.pdf [file d2ob01281b1.pdf]
